# Supplementary material for: Integrated sRNA-seq and RNA-seq Analyses Reveal a microRNA Regulation Network Involved in Cold Response in Pisum sativum L.
Source: MDPI journal article supplement (doi:10.3390/genes13071119), 2022-06-22
Supplement: s1 [file s1]

A

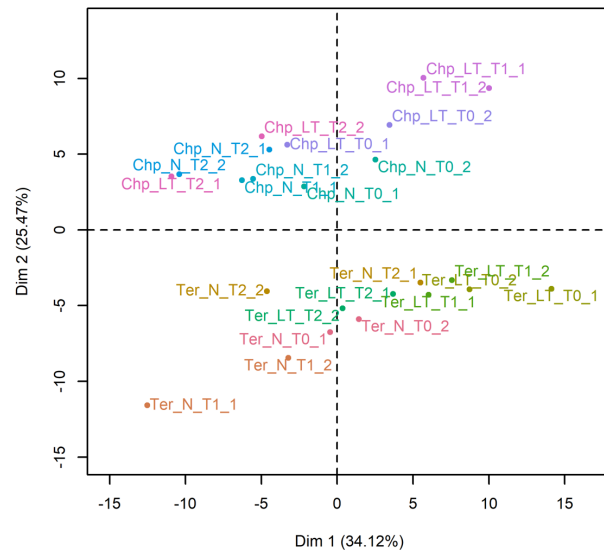

B

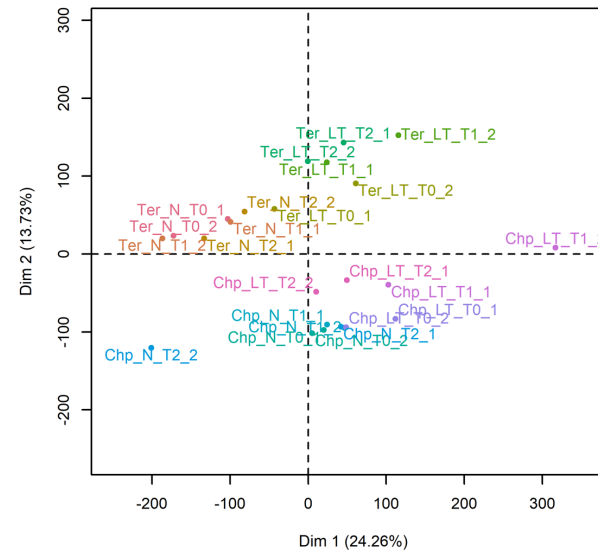

**Additional file S4:** Principal component analyses of miRNA (A) and mRNA (B) samples. Identical colours were used to represent the biological replicates (\_1 and \_2 suffixes).
