# Supplementary material for: Integrated sRNA-seq and RNA-seq Analyses Reveal a microRNA Regulation Network Involved in Cold Response in Pisum sativum L
Source: Genes (Basel). 2022 Jun 22;13(7):1119. doi: 10.3390/genes13071119 (PMC9322779; doi:10.3390/genes13071119)
Supplement: Supplementary file 1 [file genes-13-01119-s001.zip › Additional file S2-Supplementary Tables.xlsx]

## Sheet: Short file names
Supplementary table S1: miRNAs identified in this study
Supplementary tables S2-S7: Analysis of differentially expressed miRNAs in pea (Pisum sativum L.) leaves under low temperatures and at different periods of cold exposure
Table S2: Champagne specific differentially expressed miRNAs at T1
Table S3: Champagne specific differentially expressed miRNAs at T2
Table S4: Térèse specific differentially expressed miRNAs at T1
Table S5: Térèse specific differentially expressed miRNAs at T2
Table S6: Common miRNAs differentially expressed at T1
Table S7: Common miRNAs differentially expressed at T2
Supplentary table S8: Identification of miRNA targets
Supplementary tables S9-S14: Analysis of differentially expressed genes in pea (Pisum sativum L.) leaves under low temperatures and at different periods of cold exposure
Table S9: Champagne specific differentially expressed genes at T1
Table S10: Champagne specific differentially expressed genes at T2
Table S11: Térèse specific differentially expressed genes at T1
Table S12: Térèse specific differentially expressed genes at T2
Table S13: Common genes differentially expressed at T1
Table S14: Common genes differentially expressed at T2
Supplementary tables S15-S17 GO terms enrichment for the differentially expressed genes in pea (Pisum sativum L.) leaves under low temperature
Table S15: GO terms enrichment for the Champagne specific differentially expressed genes
Table S16: GO terms enrichment for the Térèse specific differentially expressed genes
Table S17: GO terms enrichment for the common genes differentially expressed

## Sheet: Table S1
Table S1: miRNAs identified in this study
For each miRNA, localisation, strand, prediction statistics, sequence, length, miR family and number of miRNA targets are specified. Presence of the miRNAs in pea [21], Fabaceae, Eudicotyledons (others than Fabaceae), Monocotyledons, Coniferophyta, Embryophyta are indicated by "+".
Localisation	strand	prediction quality	premiR length	mfei	mirna_sequence	mirna_length	In [21]	Family	Fabaceae	Eudicotyledons others	Monocotyledons	Coniferophyta	Other Embryophyta	Number of targets
c15057_g1_i1_521_662	-	6	142	-0.95	UACGCAGGAGAGAUGAUGCCG	21		miR391			+			1
c16004_g1_i1_419_511	+	6	93	-1.05	UUGACAGAAGAGAGAGAGCAC	21		miR156	+	+	+	+	+	36
c16228_g1_i1_5_118	-	6	114	-1.15	AGUUCGACUCGUUAGGUUCAUGAG	24		miR2614-m	+					1
c17414_g1_i1_759_980	-	6	222	-0.89	UCGGACCAGGCUUCAUUCCUG	21	+	miR166	+	+	+	+	+	9
c18593_g1_i1_863_1058	-	6	196	-0.84	UGAAGCUGCCAGCAUGAUCUA	21	+	miR167_1	+	+	+			8
c21453_g2_i1_127_210	-	6	84	-1.03	UCAGAGGACUCGGUUGCACCGCC	23	+							1
c24698_g2_i1_2641_2749	-	6	109	-1.05	GCUCACCCUCUAUCUGUCACC	21		miR156	+	+	+	+	+	1
c25795_g3_i1_340_467	-	6	128	-1.09	GGAAUGUUGUCUGCUUCGAGG	21		miR166	+	+	+	+	+	9
c25917_g1_i1_73_190	+	6	118	-0.82	UCGGACCAGGCUUCAUUCCCC	21	+	miR166	+	+	+	+	+	10
c27377_g1_i3_87_243	-	6	157	-1.28	UGCUCACUUCUCUUUCUGUCAUC	23		miR156	+	+	+	+	+	2
c28622_g1_i2_2792_2946	+	6	155	-0.92	UUUUUCUCUUCUCCUGGAACC	21								46
c28704_g5_i1_2734_3044	-	6	311	-1.31	UGUAGAGCCCAUGUCAAUCCAAUU	24
c29768_g5_i1_1383_1765	-	6	383	-0.99	UUUGAGCUUUUCUUUGACUUU	21				+				75
c37943_g1_i1_94_234	+	6	141	-1.02	UUUCCAAAUCUACCCAUGCCUA	22		miR482		+				11
c49474_g1_i1_1_82	+	6	82	-0.89	UGAGUCAGGAUGGGCUGCCGG	21		miR169_6	+					9
c53463_g1_i1_629_729	-	6	101	-1.12	UGACAGAAGAUAGAGAGCAC	20		miR156	+	+	+	+	+	43
c5511_g1_i1_78_198	+	6	121	-0.83	UCGGACCAGGCUUCAUUCCUU	21		miR166	+	+	+	+	+	8
chr1LG6_46352782_46352857	-	6	76	-0.84	AGAGGAUGCGUCAAUUGGAUUGGC	24
chr1LG6_49255879_49256050	+	6	172	-0.86	CAAUUGGCGCCCCUGUGUAGGACU	24				+
chr1LG6_51411458_51411592	+	6	135	-1.02	UUGACAGAAGAUAGAGAGCAC	21	+	miR156	+	+	+	+	+	39
chr1LG6_117215151_117215280	+	6	130	-1.27	UGUCGCAGGAGUGAUGGGACC	21		miR5211-m		+
chr1LG6_172907582_172907768	+	6	187	-1.04	AGCGAACCGGAAAUCUUUGAAGAA	24								1
chr1LG6_226076841_226077234	-	6	394	-1.24	AGAAAUGUAUCUCCGGACGCACCC	24
chr1LG6_226124948_226125341	-	6	394	-1.32	AGAAAUGUAUCUCCGGACGCACCC	24
chr1LG6_290598787_290598916	-	6	130	-0.91	UGAGCCAGGAUGACUUGCCGG	21	+	miR169_2	+	+	+	+
chr1LG6_291257736_291258017	-	6	282	-1.69	AAAUACCGGGUCUCCUGAACAACC	24
chr1LG6_317871855_317872254	-	6	400	-1.87	UUAGGGCAUAGAGAACUUAGAG	22
chr1LG6_317959854_317959978	-	6	125	-1.05	UUAGGACGAGUUCGGAGAUGCAUC	24		miR9778-m			+
chr1LG6_318930716_318930886	-	6	171	-0.83	GAGGCACCAGACCAAUUGACGCCU	24
chr1LG6_331428158_331428247	+	6	90	-1.28	UUGAGCCGUGCCAAUAUCACA	21		miR171_1	+	+	+	+	+	8
chr1LG6_359297682_359297807	-	6	126	-1.13	UAUUGAGUUCACUGUUGAUGA	21		miR397	+	+	+			14
chr1LG6_359320303_359320503	-	6	201	-1.07	UCAUUGAGUGCAGCGUUGAUG	21	+	miR397	+	+	+			37
chr1LG6_367283148_367283541	-	6	394	-1.23	AUGCACUCGGUCAAUGGUUGGACA	24			+
chr1LG6_369636652_369636808	+	6	157	-1.07	UCUCGGACCAGGCUUCAUUCC	21		miR166	+	+	+	+	+	5
chr2LG1_86501317_86501577	+	6	261	-1.03	UUGGACUGAAGGGAGCUCCCU	21		miR159	+	+	+	+	+	13
chr2LG1_334925023_334925164	+	6	142	-1.08	UUGUGUUCUCAGGUCACCCCU	21		miR398	+	+	+	+		1
chr2LG1_372314340_372314473	+	6	134	-0.8	UCGCUUGGUGCAGGUCGGGAA	21	+	miR168	+	+	+			5
chr2LG1_381836242_381836355	-	6	114	-1.04	UGAUUGAGCCGUGCCAAUAUC	21	+	miR171_1	+	+	+	+	+	8
chr2LG1_421777995_421778267	+	6	273	-1.67	AUGGUGAUGUGCUCCACUGGACCC	24			+
chr2LG1_422742428_422742603	+	6	176	-1.06	UUGGACUGAAGGGAGCUCCCU	21		miR159	+	+	+	+	+	13
chr3LG5_28279618_28279726	+	6	109	-0.92	ACUGAAUUUCCUCGGUUAAAG	21			+	+				7
chr3LG5_103340043_103340181	-	6	139	-0.98	UUAAAAGUUAGGCCCUGGCCCCCU	24
chr3LG5_130067641_130067899	+	6	259	-0.81	UGAAGCUGCCAGCAUGAUCU	20		miR167_1	+	+	+			31
chr3LG5_181768832_181768981	+	6	150	-0.99	UCUCGGACCAGGCUUCAUUCC	21		miR166	+	+	+	+	+	5
chr3LG5_194757971_194758069	-	6	99	-0.97	UUGACAGAAGAUAGAGAGCAC	21	+	miR156	+	+	+	+	+	39
chr3LG5_198675088_198675210	-	6	123	-1.06	GCUGGAAGGUUUUGUAGGAAC	21		miR862_2	+					16
chr3LG5_198969267_198969410	+	6	144	-0.95	GUGGGAUCCUGUUGACGGGUUAC	23		miR5037	+
chr3LG5_235830429_235830578	+	6	150	-1.15	UGGAGAAGCAGGGCACGUGCA	21	+	miR164	+	+	+	+		15
chr3LG5_235838133_235838286	+	6	154	-1.06	UGGAGAAGCAGGGCACGUGCA	21	+	miR164	+	+	+	+		15
chr3LG5_262443436_262443595	-	6	160	-1.07	UUAGGACUAUGGUUUGGACAA	21	+	miR5770	+					9
chr3LG5_381108659_381108792	+	6	134	-0.91	UUACAUAAUCCAUUGAUCAAGU	22		miR475	+	+				41
chr3LG5_381249611_381249818	-	6	208	-0.87	UUACAUAAUCCAUUGAUCAAGU	22		miR475	+	+				41
chr3LG5_422652492_422652574	-	6	83	-1.62	UUUUGGGUGAAUGUUGAUGUG	21	+							25
chr4LG4_7037616_7037726	+	6	111	-1.04	UGAUUGAGCCGUGCCAAUAUC	21	+	miR171_1	+	+	+	+	+	8
chr4LG4_10354484_10354629	+	6	146	-0.9	CCUCAUUCCAUACAUCAUCUAA	22		miR1507	+					12
chr4LG4_10361143_10361258	+	6	116	-1.18	CCUCAUUCCAUAUAUCAUCUAA	22		miR1507-m	+					18
chr4LG4_61563150_61563271	-	6	122	-1.08	UUCCACAGCUUUCUUGAACUU	21		miR396	+	+	+	+	+	46
chr4LG4_62462066_62462189	-	6	124	-1.11	UUCCACAGCUUUCUUGAACUG	21	+	miR396	+	+	+	+	+	28
chr4LG4_63910059_63910176	+	6	118	-1.02	AAUCCGGAACUCUUCGUUGAAGAC	24
chr4LG4_192576712_192576835	+	6	124	-1.16	UAUUGGCCUGGUUCACUCAGA	21		miR171_1	+	+	+	+	+	6
chr4LG4_232025198_232025331	-	6	134	-0.86	AACCAGGCUCUGAUACCAUGA	21	+	miR5139-m			+			2
chr4LG4_416993332_416993727	-	6	396	-1.78	ACCCACUUUUGACUCGUCCAAC	22								10
chr4LG4_418194647_418195045	-	6	399	-1.67	CAUAGCGACUCCUCCACCACCU	22
chr4LG4_418206808_418207206	-	6	399	-1.66	CAUAGCGACUCCUCCACCACCU	22
chr4LG4_430544529_430544925	-	6	397	-1.86	CAGAUGUGUCCGGUCGGAGCUC	22								2
chr4LG4_435065170_435065297	+	6	128	-1.09	UCGGACCAGGCUUCAUUCCCC	21	+	miR166	+	+	+	+	+	10
chr5LG3_44710419_44710524	-	6	106	-0.88	AAUCCGGAACUCUUCGUUGAAGAC	24
chr5LG3_50662476_50662611	+	6	136	-0.91	AACGGUGACGCCAAUUGGAUUGAC	24								1
chr5LG3_106621256_106621376	-	6	121	-0.83	UCUCGGACCAGGCUUCAUUCC	21		miR166	+	+	+	+	+	5
chr5LG3_106621422_106621561	-	6	140	-0.87	UCGGACCAGGCUUCAUUCCCC	21	+	miR166	+	+	+	+	+	10
chr5LG3_127478823_127478921	+	6	99	-1.08	UGGACUGAAGGGGAGCUCCUUC	22		miR159	+	+	+	+	+	4
chr5LG3_264860902_264861103	+	6	202	-1.03	UUGGACUGAAGGGAGCUCCCU	21		miR159	+	+	+	+	+	13
chr5LG3_278324568_278324675	-	6	108	-1.09	AAGCUCAGGAGGGAUAGCGCC	21	+	miR390	+	+	+	+	+	1
chr5LG3_278581982_278582377	-	6	396	-4.23	AAUGGCCGAGGGUAUGAAGAACUU	24
chr5LG3_518540971_518541144	+	6	174	-1.05	UUGAGCCGCGUCAAUAUCUUG	21	+	miR171_1-m	+	+	+	+	+	3
chr5LG3_576771935_576772069	+	6	135	-0.99	GAACAUUGAAAACCAUCACCGA	22
chr6LG2_1007572_1007801	+	6	230	-0.83	UUGGCAUUCUGUCCACCUCC	20	+	miR394	+	+	+			12
chr6LG2_19401898_19401979	+	6	82	-1.31	UGACAGAAGAGAGUGAGCAC	20	+	miR156	+	+	+	+	+	38
chr6LG2_43495963_43496100	+	6	138	-0.96	CAGACGCCAAUUCAUCUGACGCCU	24
chr6LG2_58037674_58037815	+	6	142	-1.21	UCGGACCAGACUUCAUUCCCC	21		miR166	+	+	+	+	+	3
chr6LG2_135389666_135389847	+	6	182	-1.35	AUACACUGUCGUCAAUUGAAUUGA	24
chr6LG2_188979232_188979383	+	6	152	-1.15	UCUUUGGCUAUAUUGGACUUU	21			+	+	+	+		24
chr6LG2_253790915_253791171	-	6	257	-1.25	AAUUCAAUUGGCGUCUCUGUACAA	24
chr6LG2_316896989_316897189	+	6	201	-0.86	UGCACUGCCUCUUCCCUGGCUC	22		miR408	+	+	+	+		7
chr6LG2_328900018_328900134	+	6	117	-0.83	UGGAGAAGCAGGGCACGUGCA	21	+	miR164	+	+	+	+		15
chr6LG2_370932764_370932849	-	6	86	-1.29	UGCCUGGCUCCCUGUAUGCCA	21	+	miR160	+	+	+	+	+	24
chr6LG2_400226148_400226269	+	6	122	-1.1	UGCCAAAGGAGAGUUGCCCUG	21	+	miR399	+	+	+			5
chr6LG2_440904006_440904175	+	6	170	-0.92	UUACCUACACCUCCCAUACCUA	22		miR482	+	+	+			2
chr7LG7_9428632_9428801	-	6	170	-1.08	UUGACAGAAGAUAGAGAGCAC	21	+	miR156	+	+	+	+	+	39
chr7LG7_43481221_43481427	+	6	207	-1.05	UUGGACUGAAGGGAGCUCCCU	21		miR159	+	+	+	+	+	13
chr7LG7_380299466_380299593	+	6	128	-1	UGAUUGAGCCGUGCCAAUAUC	21	+	miR171_1	+	+	+	+	+	8
chr7LG7_411821586_411821691	-	6	106	-1	UGAAGCUGCCAGCAUGAUCUU	21		miR167_1	+	+	+			15
chr7LG7_474875580_474875671	-	6	92	-1.2	UAAUCUGCAUCCUGAGGUG	19		miR2111	+	+				35
chr7LG7_479657739_479657882	-	6	144	-0.89	AAGCUCAGGAGGGAUAGCGCC	21	+	miR390	+	+	+	+	+	1
scaffold00485_99140_99293	+	6	154	-0.81	UUGGCAUUCUGUCCACCUCC	20	+	miR394	+	+	+			12
scaffold00590_255548_255651	+	6	104	-1.07	AGCCUUGGAAUGCGGAUUAUC	21		miR2111-m	+	+				4
scaffold00659_125906_126005	+	6	100	-0.9	UGAAGCUGCCAGCAUGAUCUG	21		miR167_1	+	+	+			12
scaffold02362_270523_270603	-	6	81	-0.85	CAACCCGAACCCGUUUGAGACGAG	24								1
scaffold02479_91953_92061	+	6	109	-1.05	UGACAGAAGAGAGUGAGCAC	20	+	miR156	+	+	+	+	+	38
scaffold03671_91857_92056	-	6	200	-0.88	UGAAGCUGCCAGCAUGAUCUGC	22		miR167_1	+	+	+			2
scaffold03965_44551_44668	+	6	118	-1.03	UGGAGAAGCAGGGCACGUGCA	21	+	miR164	+	+	+	+		15
scaffold04340_50698_50831	-	6	134	-0.81	UCGAUAAACCUCUGCAUCCAG	21		miR162_1	+	+	+			6
scaffold04652_41089_41174	-	6	86	-0.82	GAGACGCUUAAGGCUUUGGCGCCU	24
scaffold06276_10907_11193	+	6	287	-1.3	AUGGUGAUGUGCUCCACUGGACCC	24			+
super-scaffold6646_352010_352166	+	6	157	-1.28	UGACAGAAGAGAGUGAGCAC	20	+	miR156	+	+	+	+	+	38
super-scaffold9438_161134_161280	+	6	147	-1.44	CAAGUGGGUGAGGAAUUGGGG	21								11
c27165_g1_i6_5190_5353	+	5	164	-0.85	AACCGUAAACCGAACCGAACCGAU	24		miR11592-m		+
c28597_g1_i1_2740_2831	-	5	92	-1.28	UCUCAUGCUCUUCUGUCACUU	21		miR156	+	+	+	+	+	37
c29557_g1_i1_1445_1599	-	5	155	-1.04	AGAAUCUUGAUGAUGCUGCAU	21	+	miR172	+	+	+			50
chr1LG6_289005926_289006077	-	5	152	-0.93	UGAGCCAAGGAUGACUUG	18		miR169_2	+	+	+	+		97
chr2LG1_21550015_21550159	+	5	145	-0.9	UGUGUUCUCAGGUCGCCCCUG	21	+	miR398	+	+	+	+		1
chr2LG1_51922181_51922454	-	5	274	-0.82	UCCAAAGGGAUCGCAUUGAUCU	22		miR393	+	+	+			7
chr2LG1_67576879_67576994	-	5	116	-1.23	AGAAUCCUGAUGAUGCUGCAG	21	+	miR172	+	+	+			20
chr2LG1_67576884_67576987	-	5	104	-1.31	AGAAUCCUGAUGAUGCUGCAG	21	+	miR172	+	+	+			20
chr2LG1_104655201_104655382	+	5	182	-0.97	UUGGACUGAAGGGAGCUCCUUC	22		miR159	+	+	+	+	+	5
chr2LG1_426429639_426429800	-	5	162	-0.74	CCGGACCAGGCUUCAUUCCUC	21	+	miR166	+	+	+	+	+	8
chr3LG5_177170713_177170808	-	5	96	-1.08	GUACCGGAAGACUUUGCAAAAGAA	24		miR11306-m		+
chr3LG5_181784360_181784535	-	5	176	-0.86	ACAUGGAUCCUCUGCAGUGGCUGA	24		miR10516-m			+
chr3LG5_259252384_259252491	-	5	108	-0.96	AGCCUUGGAAUGCGGAUUACC	21		miR2111	+	+				2
chr4LG4_60884686_60884843	+	5	158	-1.08	UUGAGCCGCGCCAAUAUCACU	21		miR171_1	+	+	+	+	+	5
chr4LG4_297101306_297101478	-	5	173	-0.9	ACAUGGAUCCUCUGCAGUGGCUGA	24		miR10516-m			+
chr5LG3_61818177_61818267	+	5	91	-1.23	UUGACAGAAGAGAGUGAGCAC	21	+	miR156	+	+	+	+	+	42
chr5LG3_134064950_134065097	-	5	148	-0.8	UCGGACCAGGCUUCAUUCCCC	21	+	miR166	+	+	+	+	+	10
chr6LG2_64029994_64030124	-	5	131	-1.08	UGAAGCUGCCAGCAUGAUCU	20		miR167_1	+	+	+			31
chr6LG2_81769030_81769289	+	5	260	-1.01	UGCCUGGCUCCCUGUAUGCCA	21	+	miR160	+	+	+	+	+	24
chr6LG2_171486425_171486530	-	5	106	-0.82	UGAAGCUGCCAGCAUGAUCUU	21		miR167_1	+	+	+			15
chr6LG2_227595365_227595525	-	5	161	-0.79	AUACAUGUCGCUCUCACCUUG	21	+	miR5232-m	+					3
chr6LG2_234595517_234595637	+	5	121	-1.03	UCGGACCAGGCUUCAUUCCCC	21	+	miR166	+	+	+	+	+	10
chr6LG2_274643746_274644013	+	5	268	-0.82	UUUGGAUUGAAGGGAGCUCUA	21	+	miR159	+	+	+	+	+	41
chr6LG2_275075851_275076139	-	5	289	-1.03	UUUGGAUUGAAGGGAGCUCUA	21	+	miR159	+	+	+	+	+	41
chr6LG2_438237322_438237574	-	5	253	-1.04	UUGGACUGAAGGGGCCCCUU	20		miR159	+	+	+	+	+	10
scaffold00590_97646_97747	-	5	102	-1.33	AUCCUUGGAAUGCAGAUUAUC	21		miR2111	+	+				14
scaffold00929_26933_27082	-	5	150	-1.05	CACCCUCAAAGGCUUCCACUA	21		miR5037	+					12
scaffold01820_10822_10920	-	5	99	-0.99	UGCCUGGCUCCCUGUAUGCCA	21	+	miR160	+	+	+	+	+	24
scaffold02004_25850_26091	-	5	242	-1.06	UUUGGAUUGAAGGGAGCUCUA	21	+	miR159	+	+	+	+	+	41
scaffold03518_91562_91733	-	5	172	-1.12	UUGAGCCGCGUCAAUAUCUCG	21		miR171_1	+	+	+	+	+	2

## Sheet: Table S2
Table S2: Champagne specific differentially expressed miRNAs at T1
For each miRNA, log2 Fold Change are specified for significant contrasts. The miRNA family is indicated when identified.
miRNAs	log2 Fold Change				Annotation
	Ch_LT_T1 vs Ch_N_T1	Ch_LT_T1 vs Te_LT_T1	Ch_N_T1 vs Te_N_T1	Te_LT_T1 vs Te_N_T1
c15057_g1_i1_521_662	1.31161				mir391
chr1LG6_117215151_117215280	-3.15995		2.13841		mir5211-m
chr1LG6_359320303_359320503	1.82565	3.86488	3.42085		mir397
chr3LG5_262443436_262443595	2.10793	1.54728			mir5770
chr6LG2_171486425_171486530	0.628556				mir167_1
chr6LG2_274643746_274644013	0.642387		-0.623713		mir159
chr6LG2_275075851_275076139	0.642387		-0.623713		mir159
chr7LG7_411821586_411821691	0.628558				mir167_1
scaffold02004_25850_26091	0.642387		-0.623713		mir159

## Sheet: Table S3
Table S3: Champagne specific differentially expressed miRNAs at T2
For each miRNA, log2 Fold Change are specified for significant contrasts. The miRNA family is indicated when identified.
miRNAs	log2 Fold Change				Annotation
	Ch_LT_T2 vs Ch_N_T2	Ch_LT_T2 vs Te_LT_T2	Ch_N_T2 vs Te_N_T2	Te_LT_T2 vs Te_N_T2
c49474_g1_i1_1_82	-1.26525		1.07786		mir169_6
chr2LG1_334925023_334925164	1.2826	2.57528	1.40439		mir398

## Sheet: Table S4
Table S4: Térèse specific differentially expressed miRNAs at T1
For each miRNA, log2 Fold Change are specified for significant contrasts. The miRNA family is indicated when identified.
miRNAs	log2 Fold Change				Annotation
	Ch_LT_T1 vs Ch_N_T1	Ch_LT_T1 vs Te_LT_T1	Ch_N_T1 vs Te_N_T1	Te_LT_T1 vs Te_N_T1
c37943_g1_i1_94_234				1.16921	mir482
chr1LG6_51411458_51411592				1.386	mir156
chr3LG5_194757971_194758069				1.38599	mir156
chr4LG4_232025198_232025331		4.61291	3.25808	-0.962806	mir5139-m
chr4LG4_62462066_62462189			0.830353	1.21652	mir396
chr6LG2_227595365_227595525			0.871275	0.861765	mir5232-m
chr6LG2_438237322_438237574		-1.33332	-1.63814	-0.710755	mir159
chr7LG7_9428632_9428801				1.38598	mir156
scaffold03671_91857_92056			0.993521	0.770172	mir167_1

## Sheet: Table S5
Table S5: Térèse specific differentially expressed miRNAs at T2
For each miRNA, log2 Fold Change are specified for significant contrasts. The miRNA family is indicated when identified.
miRNAs	log2 Fold Change				Annotation
	Ch_LT_T2 vs Ch_N_T2	Ch_LT_T2 vs Te_LT_T2	Ch_N_T2 vs Te_N_T2	Te_LT_T2 vs Te_N_T2
c15057_g1_i1_521_662				1.28202	mir391
c16004_g1_i1_419_511		1.66032	0.819911	-1.62074	mir156
c18593_g1_i1_863_1058		-1.15587		1.11598	mir167_1
c21453_g2_i1_127_210		1.19995	0.74267	-1.03985
c25795_g3_i1_340_467				1.17467	mir166
chr1LG6_117215151_117215280				-3.02396	mir5211-m
chr1LG6_226076841_226077234		-1.50338		1.22696
chr1LG6_226124948_226125341		-1.50391		1.22649
chr1LG6_317871855_317872254		-1.01467		1.12035
chr1LG6_369636652_369636808				0.599817	mir166
chr2LG1_426429639_426429800				-0.603467	mir166
chr3LG5_181768832_181768981				0.599817	mir166
chr3LG5_235830429_235830578		-0.658457		0.934738	mir164
chr3LG5_235838133_235838286		-0.658462		0.934738	mir164
chr4LG4_232025198_232025331		5.08834	4.39783	-0.936456	mir5139-m
chr4LG4_63910059_63910176				-1.32354
chr5LG3_106621256_106621376				0.599817	mir166
chr5LG3_278324568_278324675				-0.707548	mir390
chr5LG3_44710419_44710524				-1.3238
chr6LG2_171486425_171486530				0.611979	mir167_1
chr6LG2_274643746_274644013				0.504938	mir159
chr6LG2_275075851_275076139				0.504937	mir159
chr6LG2_328900018_328900134		-0.65846		0.934738	mir164
chr6LG2_370932764_370932849		-0.625342		0.778643	mir160
chr6LG2_81769030_81769289		-0.625346		0.778642	mir160
chr7LG7_411821586_411821691				0.611957	mir167_1
chr7LG7_474875580_474875671			1.83648	1.33789	mir2111
chr7LG7_479657739_479657882				-0.707539	mir390
scaffold01820_10822_10920		-0.625344		0.778643	mir160
scaffold02004_25850_26091				0.504937	mir159
scaffold03965_44551_44668		-0.658463		0.934738	mir164

## Sheet: Table S6
Table S6: Common miRNAs differentially expressed at T1
For each miRNA, log2 Fold Change are specified for significant contrasts. The miRNA family is indicated when identified.
miRNAs	log2 Fold Change				Annotation
	Ch_LT_T1 vs Ch_N_T1	Ch_LT_T1 vs Te_LT_T1	Ch_N_T1 vs Te_N_T1	Te_LT_T1 vs Te_N_T1
c16004_g1_i1_419_511	1.742		1.19375	3.1597	mir156
c27377_g1_i3_87_243	1.15727			1.35499	mir156
c28597_g1_i1_2740_2831	0.903827			1.56153	mir156
chr2LG1_372314340_372314473	-0.554286	0.512844		-0.616253	mir168
chr4LG4_10361143_10361258	1.00351			1.40533	mir1507-m
chr4LG4_61563150_61563271	1.27674			1.86432	mir396
chr5LG3_61818177_61818267	1.65575		0.714789	1.92111	mir156
chr6LG2_19401898_19401979	1.04992		0.901089	1.61142	mir156
scaffold02479_91953_92061	1.04992		0.901089	1.61142	mir156
scaffold04340_50698_50831	0.917881			1.29104	mir162_1
super-scaffold6646_352010_352166	1.04992		0.901088	1.61142	mir156

## Sheet: Table S7
Table S7: Common miRNAs differentially expressed at T2
For each miRNA, log2 Fold Change are specified for significant contrasts. The miRNA family is indicated when identified.
miRNAs	log2 Fold Change				Annotation
	Ch_LT_T2 vs Ch_N_T2	Ch_LT_T2 vs Te_LT_T2	Ch_N_T2 vs Te_N_T2	Te_LT_T2 vs Te_N_T2
c25917_g1_i1_73_190	0.682374	0.541959	0.314403	0.454818	mir166
c28704_g5_i1_2734_3044	1.78854	1.22602	1.76646	2.32899
chr4LG4_435065170_435065297	0.682374	0.541959	0.314403	0.454818	mir166
chr5LG3_106621422_106621561	0.682374	0.541959	0.314403	0.454818	mir166
chr5LG3_134064950_134065097	0.682374	0.541959	0.314403	0.454818	mir166
chr5LG3_61818177_61818267	-0.898233	0.805652	0.83402	-0.869865	mir156
chr6LG2_19401898_19401979	-1.28686	0.981814	0.882525	-1.38615	mir156
chr6LG2_227595365_227595525	1.1194		0.871802	1.6248	mir5232-m
chr6LG2_234595517_234595637	0.682374	0.541959	0.314403	0.454818	mir166
chr6LG2_438237322_438237574	-0.864074	-0.83057	-0.615701	-0.649204	mir159
scaffold02479_91953_92061	-1.28686	0.981814	0.882526	-1.38615	mir156
super-scaffold6646_352010_352166	-1.28687	0.981813	0.882528	-1.38615	mir156

## Sheet: Table S8
Table S8: identification of miRNA target genes
For each miRNA, the location, family and putative target gene ID are specified. Target genes were annotated using a BlastX search performed against the protein sequences from Arabidopsis thaliana (TAIR10). Only matches with an E-value <1E-5 were considered.
miRNA location	miRNA family	Target gene ID	Arabidopsis thaliana best blastx match	Function	E-value
c15057_g1_i1_521_662	mir391	Psat2g044200.1	AT1G65810.2	| Symbols: | P-loop containing nucleoside triphosphate hydrolases superfamily protein | chr1:24477043-24480728 REVERSE LENGTH=1016	4e-137
c16004_g1_i1_419_511	mir156	Psat5g096720.4	AT5G43270.1	| Symbols: SPL2 | squamosa promoter binding protein-like 2 | chr5:17360527-17362143 REVERSE LENGTH=419	7e-57
c16004_g1_i1_419_511	mir156	Psat7g077080.3	AT5G43270.1	| Symbols: SPL2 | squamosa promoter binding protein-like 2 | chr5:17360527-17362143 REVERSE LENGTH=419	7e-54
c16004_g1_i1_419_511	mir156	Psat7g077080.1	AT5G43270.1	| Symbols: SPL2 | squamosa promoter binding protein-like 2 | chr5:17360527-17362143 REVERSE LENGTH=419	7e-54
c16004_g1_i1_419_511	mir156	Psat7g077080.2	AT5G43270.1	| Symbols: SPL2 | squamosa promoter binding protein-like 2 | chr5:17360527-17362143 REVERSE LENGTH=419	7e-54
c16004_g1_i1_419_511	mir156	Psat5g096720.1	AT5G43270.1	| Symbols: SPL2 | squamosa promoter binding protein-like 2 | chr5:17360527-17362143 REVERSE LENGTH=419	3e-59
c16004_g1_i1_419_511	mir156	Psat5g096720.2	AT5G43270.1	| Symbols: SPL2 | squamosa promoter binding protein-like 2 | chr5:17360527-17362143 REVERSE LENGTH=419	3e-59
c16004_g1_i1_419_511	mir156	Psat5g096720.3	AT5G43270.1	| Symbols: SPL2 | squamosa promoter binding protein-like 2 | chr5:17360527-17362143 REVERSE LENGTH=419	3e-59
c16004_g1_i1_419_511	mir156	Psat3g069560.1	AT2G42200.1	| Symbols: SPL9, AtSPL9 | squamosa promoter binding protein-like 9 | chr2:17587601-17589451 FORWARD LENGTH=375	5e-65
c16004_g1_i1_419_511	mir156	Psat6g101960.1	AT2G42200.1	| Symbols: SPL9, AtSPL9 | squamosa promoter binding protein-like 9 | chr2:17587601-17589451 FORWARD LENGTH=375	2e-54
c16004_g1_i1_419_511	mir156	Psat2g077800.1	No hits found
c16004_g1_i1_419_511	mir156	Psat2g077800.2	No hits found
c16004_g1_i1_419_511	mir156	Psat2g077800.3	No hits found
c16004_g1_i1_419_511	mir156	Psat2g133080.1	AT1G69170.1	| Symbols: | Squamosa promoter-binding protein-like (SBP domain) transcription factor family protein | chr1:26005626-26007041 FORWARD LENGTH=405	4e-61
c16004_g1_i1_419_511	mir156	Psat4g046440.1	AT1G69170.1	| Symbols: | Squamosa promoter-binding protein-like (SBP domain) transcription factor family protein | chr1:26005626-26007041 FORWARD LENGTH=405	4e-48
c16004_g1_i1_419_511	mir156	Psat4g046440.2	AT1G69170.1	| Symbols: | Squamosa promoter-binding protein-like (SBP domain) transcription factor family protein | chr1:26005626-26007041 FORWARD LENGTH=405	4e-48
c16004_g1_i1_419_511	mir156	Psat1g127000.2	AT1G69170.1	| Symbols: | Squamosa promoter-binding protein-like (SBP domain) transcription factor family protein | chr1:26005626-26007041 FORWARD LENGTH=405	9e-48
c16004_g1_i1_419_511	mir156	Psat1g127000.1	AT1G69170.1	| Symbols: | Squamosa promoter-binding protein-like (SBP domain) transcription factor family protein | chr1:26005626-26007041 FORWARD LENGTH=405	9e-48
c16004_g1_i1_419_511	mir156	Psat5g052160.1	AT5G50570.2	| Symbols: SPL13A, SPL13 | Squamosa promoter-binding protein-like (SBP domain) transcription factor family protein| chr5:20582555-20583791 REVERSE LENGTH=359	1e-67
c16004_g1_i1_419_511	mir156	Psat3g157680.1	AT1G27360.4	| Symbols: SPL11 | squamosa promoter-like 11 | chr1:9502139-9503715 FORWARD LENGTH=393	7e-38
c16004_g1_i1_419_511	mir156	Psat3g164360.2	AT5G50570.2	| Symbols: SPL13A, SPL13 | Squamosa promoter-binding protein-like (SBP domain) transcription factor family protein| chr5:20582555-20583791 REVERSE LENGTH=359	4e-43
c16004_g1_i1_419_511	mir156	Psat3g164360.1	AT5G50570.2	| Symbols: SPL13A, SPL13 | Squamosa promoter-binding protein-like (SBP domain) transcription factor family protein| chr5:20582555-20583791 REVERSE LENGTH=359	4e-43
c16004_g1_i1_419_511	mir156	Psat2g015200.1	AT1G50840.1	| Symbols: POLGAMMA2 | polymerase gamma 2 | chr1:18839277-18844313 FORWARD LENGTH=1050	0
c16004_g1_i1_419_511	mir156	Psat2g190200.1	AT1G76690.1	| Symbols: OPR2, ATOPR2 | 12-oxophytodienoate reductase 2 | chr1:28778976-28780355 FORWARD LENGTH=374	0
c16004_g1_i1_419_511	mir156	Psat6g007040.1	AT1G80950.1	| Symbols: | Phospholipid/glycerol acyltransferase family protein | chr1:30412653-30414935 REVERSE LENGTH=398	3e-169
c16004_g1_i1_419_511	mir156	Psat2g008680.1	No hits found
c16004_g1_i1_419_511	mir156	Psat6g033960.1	AT5G25610.1	| Symbols: RD22, ATRD22 | BURP domain-containing protein | chr5:8914498-8916684 REVERSE LENGTH=392	5e-119
c16004_g1_i1_419_511	mir156	Psat6g033960.2	AT5G25610.1	| Symbols: RD22, ATRD22 | BURP domain-containing protein | chr5:8914498-8916684 REVERSE LENGTH=392	1e-109
c16004_g1_i1_419_511	mir156	Psat2g182880.1	AT1G63440.1	| Symbols: HMA5 | heavy metal atpase 5 | chr1:23527655-23531109 FORWARD LENGTH=995	0
c16004_g1_i1_419_511	mir156	Psat2g077800.1	No hits found
c16004_g1_i1_419_511	mir156	Psat2g077800.2	No hits found
c16004_g1_i1_419_511	mir156	Psat2g077800.3	No hits found
c16004_g1_i1_419_511	mir156	Psat2g009800.1	AT5G55220.1	| Symbols: | trigger factor type chaperone family protein | chr5:22397677-22400678 FORWARD LENGTH=547	0
c16004_g1_i1_419_511	mir156	Psat4g059920.1	AT5G63090.4	| Symbols: LOB | Lateral organ boundaries (LOB) domain family protein | chr5:25308723-25309283 REVERSE LENGTH=186	1e-77
c16004_g1_i1_419_511	mir156	Psat5g040520.1	AT4G00340.1	| Symbols: RLK4 | receptor-like protein kinase 4 | chr4:148958-151496 FORWARD LENGTH=818	2e-97
c16004_g1_i1_419_511	mir156	Psat2g171720.1	AT4G37670.2	| Symbols: NAGS2 | N-acetyl-l-glutamate synthase 2 | chr4:17696179-17698836 REVERSE LENGTH=613	0
c16004_g1_i1_419_511	mir156	Psat5g094840.1	No hits found
c16228_g1_i1_5_118	mir2614-m	Psat0s193g0040.1	No hits found
c17414_g1_i1_759_980	mir166	Psat4g221480.2	AT1G52150.3	| Symbols: ATHB-15, ATHB15, CNA, ICU4 | Homeobox-leucine zipper family protein / lipid-binding START domain-containing protein | chr1:19410118-19413961 REVERSE LENGTH=794	0
c17414_g1_i1_759_980	mir166	Psat5g297000.1	AT1G52150.1	| Symbols: ATHB-15, ATHB15, CNA, ICU4 | Homeobox-leucine zipper family protein / lipid-binding START domain-containing protein | chr1:19409913-19413961 REVERSE LENGTH=836	0
c17414_g1_i1_759_980	mir166	Psat4g221480.1	AT1G52150.1	| Symbols: ATHB-15, ATHB15, CNA, ICU4 | Homeobox-leucine zipper family protein / lipid-binding START domain-containing protein | chr1:19409913-19413961 REVERSE LENGTH=836	0
c17414_g1_i1_759_980	mir166	Psat5g279960.1	AT5G60690.1	| Symbols: REV, IFL, IFL1 | Homeobox-leucine zipper family protein / lipid-binding START domain-containing protein| chr5:24397734-24401933 FORWARD LENGTH=842	0
c17414_g1_i1_759_980	mir166	Psat7g225360.1	AT5G60690.1	| Symbols: REV, IFL, IFL1 | Homeobox-leucine zipper family protein / lipid-binding START domain-containing protein| chr5:24397734-24401933 FORWARD LENGTH=842	0
c17414_g1_i1_759_980	mir166	Psat1g167760.2	AT2G34710.1	| Symbols: PHB, ATHB14, ATHB-14, PHB-1D | Homeobox-leucine zipper family protein / lipid-binding START domain-containing protein | chr2:14639548-14643993 REVERSE LENGTH=852	0
c17414_g1_i1_759_980	mir166	Psat1g167760.1	AT2G34710.1	| Symbols: PHB, ATHB14, ATHB-14, PHB-1D | Homeobox-leucine zipper family protein / lipid-binding START domain-containing protein | chr2:14639548-14643993 REVERSE LENGTH=852	0
c17414_g1_i1_759_980	mir166	Psat5g020800.1	AT4G32880.1	| Symbols: ATHB-8, ATHB8, HB-8 | homeobox gene 8 | chr4:15863587-15867822 REVERSE LENGTH=833	0
c17414_g1_i1_759_980	mir166	Psat1g133120.1	AT2G06000.2	| Symbols: | Pentatricopeptide repeat (PPR) superfamily protein | chr2:2328000-2329610 REVERSE LENGTH=536	2e-163
c18593_g1_i1_863_1058	mir167_1	Psat5g229040.1	AT1G53000.1	| Symbols: KDSB | Nucleotide-diphospho-sugar transferases superfamily protein | chr1:19745330-19747133 REVERSE LENGTH=290	1e-174
c18593_g1_i1_863_1058	mir167_1	Psat2g042360.1	AT5G37020.1	| Symbols: ARF8, ATARF8 | auxin response factor 8 | chr5:14630151-14634106 FORWARD LENGTH=811	0
c18593_g1_i1_863_1058	mir167_1	Psat2g042360.2	AT5G37020.2	| Symbols: ARF8 | auxin response factor 8 | chr5:14630151-14633916 FORWARD LENGTH=773	0
c18593_g1_i1_863_1058	mir167_1	Psat5g144000.1	AT5G37020.1	| Symbols: ARF8, ATARF8 | auxin response factor 8 | chr5:14630151-14634106 FORWARD LENGTH=811	0
c18593_g1_i1_863_1058	mir167_1	Psat7g227760.1	AT1G50510.1	| Symbols: | indigoidine synthase A family protein | chr1:18716578-18719060 FORWARD LENGTH=330	6e-159
c18593_g1_i1_863_1058	mir167_1	Psat7g227760.2	AT1G50510.1	| Symbols: | indigoidine synthase A family protein | chr1:18716578-18719060 FORWARD LENGTH=330	6e-149
c18593_g1_i1_863_1058	mir167_1	Psat7g227760.3	AT1G50510.1	| Symbols: | indigoidine synthase A family protein | chr1:18716578-18719060 FORWARD LENGTH=330	8e-133
c18593_g1_i1_863_1058	mir167_1	Psat5g027120.1	AT1G15520.1	| Symbols: PDR12, ATPDR12, ABCG40, ATABCG40 | pleiotropic drug resistance 12 | chr1:5331993-5338175 REVERSE LENGTH=1423	0
c21453_g2_i1_127_210		Psat1g035040.1	AT1G73760.1	| Symbols: | RING/U-box superfamily protein | chr1:27739366-27741161 REVERSE LENGTH=367	8e-71
c24698_g2_i1_2641_2749	mir156	Psat4g133320.1	No hits found
c25795_g3_i1_340_467	mir166	Psat1g158080.1	No hits found
c25795_g3_i1_340_467	mir166	Psat7g006120.1	AT2G43350.2	| Symbols: GPX3 | glutathione peroxidase 3 | chr2:18009195-18010533 REVERSE LENGTH=206	5e-87
c25795_g3_i1_340_467	mir166	Psat4g054360.1	AT1G74790.1	| Symbols: | catalytics | chr1:28098912-28101673 FORWARD LENGTH=695	0
c25795_g3_i1_340_467	mir166	Psat4g054360.2	AT1G74790.1	| Symbols: | catalytics | chr1:28098912-28101673 FORWARD LENGTH=695	0
c25795_g3_i1_340_467	mir166	Psat1g010960.1	AT2G35155.1	| Symbols: | Trypsin family protein | chr2:14819209-14821330 REVERSE LENGTH=579	4e-17
c25795_g3_i1_340_467	mir166	Psat4g048880.1	AT5G61260.1	| Symbols: | Plant calmodulin-binding protein-related | chr5:24637109-24638599 FORWARD LENGTH=496	2e-19
c25795_g3_i1_340_467	mir166	Psat0s1764g0080.1	AT5G22900.1	| Symbols: ATCHX3, CHX3 | cation/H+ exchanger 3 | chr5:7657224-7659868 FORWARD LENGTH=822	1e-170
c25795_g3_i1_340_467	mir166	Psat7g257480.2	AT1G15290.1	| Symbols: | Tetratricopeptide repeat (TPR)-like superfamily protein | chr1:5257327-5264814 REVERSE LENGTH=1608	0
c25795_g3_i1_340_467	mir166	Psat7g257480.1	AT1G15290.1	| Symbols: | Tetratricopeptide repeat (TPR)-like superfamily protein | chr1:5257327-5264814 REVERSE LENGTH=1608	0
c25917_g1_i1_73_190	mir166	Psat4g221480.1	AT1G52150.1	| Symbols: ATHB-15, ATHB15, CNA, ICU4 | Homeobox-leucine zipper family protein / lipid-binding START domain-containing protein | chr1:19409913-19413961 REVERSE LENGTH=836	0
c25917_g1_i1_73_190	mir166	Psat5g297000.1	AT1G52150.1	| Symbols: ATHB-15, ATHB15, CNA, ICU4 | Homeobox-leucine zipper family protein / lipid-binding START domain-containing protein | chr1:19409913-19413961 REVERSE LENGTH=836	0
c25917_g1_i1_73_190	mir166	Psat4g221480.2	AT1G52150.3	| Symbols: ATHB-15, ATHB15, CNA, ICU4 | Homeobox-leucine zipper family protein / lipid-binding START domain-containing protein | chr1:19410118-19413961 REVERSE LENGTH=794	0
c25917_g1_i1_73_190	mir166	Psat1g167760.1	AT2G34710.1	| Symbols: PHB, ATHB14, ATHB-14, PHB-1D | Homeobox-leucine zipper family protein / lipid-binding START domain-containing protein | chr2:14639548-14643993 REVERSE LENGTH=852	0
c25917_g1_i1_73_190	mir166	Psat7g225360.1	AT5G60690.1	| Symbols: REV, IFL, IFL1 | Homeobox-leucine zipper family protein / lipid-binding START domain-containing protein| chr5:24397734-24401933 FORWARD LENGTH=842	0
c25917_g1_i1_73_190	mir166	Psat1g167760.2	AT2G34710.1	| Symbols: PHB, ATHB14, ATHB-14, PHB-1D | Homeobox-leucine zipper family protein / lipid-binding START domain-containing protein | chr2:14639548-14643993 REVERSE LENGTH=852	0
c25917_g1_i1_73_190	mir166	Psat5g279960.1	AT5G60690.1	| Symbols: REV, IFL, IFL1 | Homeobox-leucine zipper family protein / lipid-binding START domain-containing protein| chr5:24397734-24401933 FORWARD LENGTH=842	0
c25917_g1_i1_73_190	mir166	Psat5g020800.1	AT4G32880.1	| Symbols: ATHB-8, ATHB8, HB-8 | homeobox gene 8 | chr4:15863587-15867822 REVERSE LENGTH=833	0
c25917_g1_i1_73_190	mir166	Psat2g173760.1	AT3G57990.1	| Symbols: | unknown protein; Has 1497 Blast hits to 1323 proteins in 52 species: Archae - 0; Bacteria - 4;Metazoa - 23; Fungi - 34; Plants - 61; Viruses - 0; Other Eukaryotes- 1375 (source: NCBI BLink). | chr3:21470244-21471347 REVERSE LENGTH=367	9e-31
c25917_g1_i1_73_190	mir166	Psat1g131440.1	No hits found
c27377_g1_i3_87_243	mir156	Psat3g195160.1	AT5G39950.1	| Symbols: ATTRX2, ATH2, ATTRXH2, TRXH2, TRX2 | thioredoxin 2 | chr5:15990885-15991881 REVERSE LENGTH=133	2e-58
c27377_g1_i3_87_243	mir156	Psat5g240800.1	No hits found
c28597_g1_i1_2740_2831	mir156	Psat0s6346g0040.1	AT3G63280.2	| Symbols: ATNEK4, NEK4 | NIMA-related kinase 4 | chr3:23378582-23381362 FORWARD LENGTH=555	1e-172
c28597_g1_i1_2740_2831	mir156	Psat4g053040.1	No hits found
c28597_g1_i1_2740_2831	mir156	Psat3g120520.1	No hits found
c28597_g1_i1_2740_2831	mir156	Psat7g249960.2	AT2G38440.1	| Symbols: ITB1, SCAR2, DIS3, WAVE4, ATSCAR2 | SCAR homolog 2 | chr2:16095550-16100851 FORWARD LENGTH=1399	5e-119
c28597_g1_i1_2740_2831	mir156	Psat7g249960.1	AT2G38440.1	| Symbols: ITB1, SCAR2, DIS3, WAVE4, ATSCAR2 | SCAR homolog 2 | chr2:16095550-16100851 FORWARD LENGTH=1399	1e-120
c28597_g1_i1_2740_2831	mir156	Psat2g178240.1	AT5G47430.2	| Symbols: | DWNN domain, a CCHC-type zinc finger | chr5:19235819-19240147 REVERSE LENGTH=831	4e-79
c28597_g1_i1_2740_2831	mir156	Psat0s1867g0040.1	AT2G23320.1	| Symbols: WRKY15 | WRKY DNA-binding protein 15 | chr2:9924998-9926154 FORWARD LENGTH=317	4e-77
c28597_g1_i1_2740_2831	mir156	Psat0s1867g0040.2	AT2G23320.2	| Symbols: WRKY15 | WRKY DNA-binding protein 15 | chr2:9924998-9925991 FORWARD LENGTH=262	3e-47
c28597_g1_i1_2740_2831	mir156	Psat3g096560.1	AT3G51880.2	| Symbols: HMGB1, NFD1 | high mobility group B1 | chr3:19247241-19248491 REVERSE LENGTH=185	1e-21
c28597_g1_i1_2740_2831	mir156	Psat7g095920.2	AT1G25270.1	| Symbols: | nodulin MtN21 /EamA-like transporter family protein | chr1:8857726-8859909 FORWARD LENGTH=355	5e-95
c28597_g1_i1_2740_2831	mir156	Psat7g096040.1	AT1G68170.1	| Symbols: | nodulin MtN21 /EamA-like transporter family protein | chr1:25551925-25554258 FORWARD LENGTH=356	8e-63
c28597_g1_i1_2740_2831	mir156	Psat7g095920.3	AT1G25270.1	| Symbols: | nodulin MtN21 /EamA-like transporter family protein | chr1:8857726-8859909 FORWARD LENGTH=355	1e-64
c28597_g1_i1_2740_2831	mir156	Psat7g195480.11	AT3G21810.1	| Symbols: | Zinc finger C-x8-C-x5-C-x3-H type family protein | chr3:7684852-7688360 FORWARD LENGTH=437	7e-48
c28597_g1_i1_2740_2831	mir156	Psat7g195480.7	AT3G21810.1	| Symbols: | Zinc finger C-x8-C-x5-C-x3-H type family protein | chr3:7684852-7688360 FORWARD LENGTH=437	7e-48
c28597_g1_i1_2740_2831	mir156	Psat7g195480.9	AT3G21810.1	| Symbols: | Zinc finger C-x8-C-x5-C-x3-H type family protein | chr3:7684852-7688360 FORWARD LENGTH=437	7e-48
c28597_g1_i1_2740_2831	mir156	Psat7g195480.10	AT3G21810.1	| Symbols: | Zinc finger C-x8-C-x5-C-x3-H type family protein | chr3:7684852-7688360 FORWARD LENGTH=437	7e-48
c28597_g1_i1_2740_2831	mir156	Psat7g195480.8	AT3G21810.1	| Symbols: | Zinc finger C-x8-C-x5-C-x3-H type family protein | chr3:7684852-7688360 FORWARD LENGTH=437	2e-32
c28597_g1_i1_2740_2831	mir156	Psat7g195480.5	AT3G21810.1	| Symbols: | Zinc finger C-x8-C-x5-C-x3-H type family protein | chr3:7684852-7688360 FORWARD LENGTH=437	2e-32
c28597_g1_i1_2740_2831	mir156	Psat7g195480.1	AT3G21810.1	| Symbols: | Zinc finger C-x8-C-x5-C-x3-H type family protein | chr3:7684852-7688360 FORWARD LENGTH=437	2e-32
c28597_g1_i1_2740_2831	mir156	Psat7g195480.4	AT3G21810.1	| Symbols: | Zinc finger C-x8-C-x5-C-x3-H type family protein | chr3:7684852-7688360 FORWARD LENGTH=437	2e-32
c28597_g1_i1_2740_2831	mir156	Psat7g195480.6	AT3G21810.1	| Symbols: | Zinc finger C-x8-C-x5-C-x3-H type family protein | chr3:7684852-7688360 FORWARD LENGTH=437	2e-32
c28597_g1_i1_2740_2831	mir156	Psat7g195480.3	AT3G21810.1	| Symbols: | Zinc finger C-x8-C-x5-C-x3-H type family protein | chr3:7684852-7688360 FORWARD LENGTH=437	2e-32
c28597_g1_i1_2740_2831	mir156	Psat7g195480.12	AT3G21810.1	| Symbols: | Zinc finger C-x8-C-x5-C-x3-H type family protein | chr3:7684852-7688360 FORWARD LENGTH=437	2e-32
c28597_g1_i1_2740_2831	mir156	Psat7g195480.2	AT3G21810.1	| Symbols: | Zinc finger C-x8-C-x5-C-x3-H type family protein | chr3:7684852-7688360 FORWARD LENGTH=437	2e-32
c28597_g1_i1_2740_2831	mir156	Psat1g059600.1	AT5G14880.1	| Symbols: | Potassium transporter family protein | chr5:4814244-4817667 FORWARD LENGTH=781	0
c28597_g1_i1_2740_2831	mir156	Psat5g217040.1	No hits found
c28597_g1_i1_2740_2831	mir156	Psat0s2466g0040.1	AT1G26840.1	| Symbols: ORC6, ATORC6 | origin recognition complex protein 6 | chr1:9298822-9300603 FORWARD LENGTH=284	5e-115
c28597_g1_i1_2740_2831	mir156	Psat0s740g0280.1	AT3G17040.1	| Symbols: HCF107 | high chlorophyll fluorescent 107 | chr3:5809378-5812605 REVERSE LENGTH=652	0
c28597_g1_i1_2740_2831	mir156	Psat4g103840.1	AT1G20693.2	| Symbols: HMGB2, HMG BETA 1, NFD2, NFD02 | high mobility group B2 | chr1:7177282-7178487 FORWARD LENGTH=142	7e-49
c28597_g1_i1_2740_2831	mir156	Psat5g186320.1	AT1G07930.2	| Symbols: | GTP binding Elongation factor Tu family protein | chr1:2459014-2460458 FORWARD LENGTH=372	5e-77
c28597_g1_i1_2740_2831	mir156	Psat5g005720.1	AT1G34420.1	| Symbols: | leucine-rich repeat transmembrane protein kinase family protein | chr1:12584587-12587570 FORWARD LENGTH=966	3e-25
c28597_g1_i1_2740_2831	mir156	Psat7g011440.1	AT1G34420.1	| Symbols: | leucine-rich repeat transmembrane protein kinase family protein | chr1:12584587-12587570 FORWARD LENGTH=966	7e-39
c28597_g1_i1_2740_2831	mir156	Psat2g020160.1	AT3G51650.1	| Symbols: | unknown protein; BEST Arabidopsis thaliana protein match is: unknown protein (TAIR:AT3G51640.1);Has 27645 Blast hits to 15097 proteins in 1246 species: Archae- 44; Bacteria - 3367; Metazoa - 10036; Fungi - 2690; Plants- 1205; Viruses - 196; Other Eukaryotes - 10107 (source:NCBI BLink). | chr3:19159449-19162267 FORWARD LENGTH=842	8e-11
c28597_g1_i1_2740_2831	mir156	Psat4g143400.1	No hits found
c28597_g1_i1_2740_2831	mir156	Psat4g012280.1	AT5G17050.1	| Symbols: UGT78D2 | UDP-glucosyl transferase 78D2 | chr5:5607828-5609392 REVERSE LENGTH=460	5e-157
c28597_g1_i1_2740_2831	mir156	Psat4g020560.1	AT1G69850.1	| Symbols: ATNRT1:2, NTL1, NRT1:2 | nitrate transporter 1:2 | chr1:26296945-26300407 REVERSE LENGTH=585	1e-135
c28597_g1_i1_2740_2831	mir156	Psat5g069400.1	AT5G05190.1	| Symbols: | Protein of unknown function (DUF3133) | chr5:1541853-1543875 FORWARD LENGTH=615	4e-20
c28622_g1_i2_2792_2946		Psat1g204720.1	AT4G04960.1	| Symbols: | Concanavalin A-like lectin protein kinase family protein | chr4:2533096-2535156 FORWARD LENGTH=686	0
c28622_g1_i2_2792_2946		Psat7g237240.1	AT1G18870.1	| Symbols: ICS2, ATICS2 | isochorismate synthase 2 | chr1:6515486-6519176 FORWARD LENGTH=562	0
c28622_g1_i2_2792_2946		Psat2g023840.1	AT3G11910.1	| Symbols: UBP13 | ubiquitin-specific protease 13 | chr3:3761758-3770290 REVERSE LENGTH=1115	0
c28622_g1_i2_2792_2946		Psat5g107120.1	AT3G11910.1	| Symbols: UBP13 | ubiquitin-specific protease 13 | chr3:3761758-3770290 REVERSE LENGTH=1115	0
c28622_g1_i2_2792_2946		Psat2g043480.1	AT3G08960.1	| Symbols: | ARM repeat superfamily protein | chr3:2730405-2736762 REVERSE LENGTH=1010	2e-104
c28622_g1_i2_2792_2946		Psat2g136520.1	No hits found
c28622_g1_i2_2792_2946		Psat3g140400.1	No hits found
c28622_g1_i2_2792_2946		Psat4g064640.1	No hits found
c28622_g1_i2_2792_2946		Psat3g098520.1	AT2G43370.1	| Symbols: | RNA-binding (RRM/RBD/RNP motifs) family protein | chr2:18013431-18015376 FORWARD LENGTH=333	1e-114
c28622_g1_i2_2792_2946		Psat1g195160.1	AT2G42760.1	| Symbols: | unknown protein; CONTAINS InterPro DOMAIN/s: Protein of unknown function DUF1685 (InterPro:IPR012881);Has 170 Blast hits to 164 proteins in 34 species: Archae- 0; Bacteria - 1; Metazoa - 26; Fungi - 10; Plants - 107;Viruses - 0; Other Eukaryotes - 26 (source: NCBI BLink).| chr2:17796382-17797185 REVERSE LENGTH=267	1e-36
c28622_g1_i2_2792_2946		Psat5g237960.1	AT1G50920.1	| Symbols: | Nucleolar GTP-binding protein | chr1:18870555-18872570 FORWARD LENGTH=671	0
c28622_g1_i2_2792_2946		Psat3g104280.1	AT3G44370.1	| Symbols: | Membrane insertion protein, OxaA/YidC with tetratricopeptide repeat domain | chr3:16030515-16035147 REVERSE LENGTH=566	4e-142
c28622_g1_i2_2792_2946		Psat3g104280.2	AT1G65080.1	| Symbols: | Membrane insertion protein, OxaA/YidC with tetratricopeptide repeat domain | chr1:24176619-24180729 FORWARD LENGTH=525	5e-126
c28622_g1_i2_2792_2946		Psat3g104280.3	AT1G65080.1	| Symbols: | Membrane insertion protein, OxaA/YidC with tetratricopeptide repeat domain | chr1:24176619-24180729 FORWARD LENGTH=525	4e-121
c28622_g1_i2_2792_2946		Psat4g018840.1	AT1G74950.1	| Symbols: JAZ2, TIFY10B | TIFY domain/Divergent CCT motif family protein | chr1:28148919-28150258 REVERSE LENGTH=249	2e-19
c28622_g1_i2_2792_2946		Psat2g183440.1	No hits found
c28622_g1_i2_2792_2946		Psat5g297560.1	AT1G50920.1	| Symbols: | Nucleolar GTP-binding protein | chr1:18870555-18872570 FORWARD LENGTH=671	0
c28622_g1_i2_2792_2946		Psat6g213120.1	AT1G44910.1	| Symbols: ATPRP40A, PRP40A | pre-mRNA-processing protein 40A | chr1:16975930-16982818 FORWARD LENGTH=958	0
c28622_g1_i2_2792_2946		Psat6g213120.2	AT1G44910.1	| Symbols: ATPRP40A, PRP40A | pre-mRNA-processing protein 40A | chr1:16975930-16982818 FORWARD LENGTH=958	0
c28622_g1_i2_2792_2946		Psat7g021400.1	AT4G12750.1	| Symbols: | Homeodomain-like transcriptional regulator | chr4:7498009-7503920 REVERSE LENGTH=1131	0
c28622_g1_i2_2792_2946		Psat2g068280.1	AT5G06600.2	| Symbols: UBP12 | ubiquitin-specific protease 12 | chr5:2019545-2027834 REVERSE LENGTH=1115	0
c28622_g1_i2_2792_2946		Psat1g049080.1	AT4G26220.1	| Symbols: | S-adenosyl-L-methionine-dependent methyltransferases superfamily protein | chr4:13284179-13285146 FORWARD LENGTH=232	9e-97
c28622_g1_i2_2792_2946		Psat3g068040.2	AT2G42040.1	| Symbols: | CONTAINS InterPro DOMAIN/s: WRC (InterPro:IPR014977); Has 219 Blast hits to 219 proteins in 19 species: Archae - 0; Bacteria - 0; Metazoa - 3; Fungi - 0; Plants- 215; Viruses - 0; Other Eukaryotes - 1 (source: NCBI BLink). | chr2:17543282-17545063 FORWARD LENGTH=269	1e-20
c28622_g1_i2_2792_2946		Psat3g068040.1	AT2G42040.1	| Symbols: | CONTAINS InterPro DOMAIN/s: WRC (InterPro:IPR014977); Has 219 Blast hits to 219 proteins in 19 species: Archae - 0; Bacteria - 0; Metazoa - 3; Fungi - 0; Plants- 215; Viruses - 0; Other Eukaryotes - 1 (source: NCBI BLink). | chr2:17543282-17545063 FORWARD LENGTH=269	1e-20
c28622_g1_i2_2792_2946		Psat0s5171g0040.1	AT2G42040.1	| Symbols: | CONTAINS InterPro DOMAIN/s: WRC (InterPro:IPR014977); Has 219 Blast hits to 219 proteins in 19 species: Archae - 0; Bacteria - 0; Metazoa - 3; Fungi - 0; Plants- 215; Viruses - 0; Other Eukaryotes - 1 (source: NCBI BLink). | chr2:17543282-17545063 FORWARD LENGTH=269	5e-18
c28622_g1_i2_2792_2946		Psat0s5171g0040.2	AT2G42040.1	| Symbols: | CONTAINS InterPro DOMAIN/s: WRC (InterPro:IPR014977); Has 219 Blast hits to 219 proteins in 19 species: Archae - 0; Bacteria - 0; Metazoa - 3; Fungi - 0; Plants- 215; Viruses - 0; Other Eukaryotes - 1 (source: NCBI BLink). | chr2:17543282-17545063 FORWARD LENGTH=269	5e-18
c28622_g1_i2_2792_2946		Psat3g127280.1	AT5G05580.1	| Symbols: FAD8 | fatty acid desaturase 8 | chr5:1664331-1666345 FORWARD LENGTH=435	0
c28622_g1_i2_2792_2946		Psat5g226480.1	No hits found
c28622_g1_i2_2792_2946		Psat7g067280.1	AT1G29750.2	| Symbols: RKF1 | receptor-like kinase in flowers 1 | chr1:10414071-10420469 REVERSE LENGTH=1021	0
c28622_g1_i2_2792_2946		Psat3g161320.1	No hits found
c28622_g1_i2_2792_2946		Psat1g029200.1	AT5G60840.1	| Symbols: | unknown protein; Has 361 Blast hits to 333 proteins in 92 species: Archae - 2; Bacteria - 55; Metazoa- 145; Fungi - 36; Plants - 42; Viruses - 19; Other Eukaryotes- 62 (source: NCBI BLink). | chr5:24473442-24474423 REVERSE LENGTH=207	6e-09
c28622_g1_i2_2792_2946		Psat3g140400.1	No hits found
c28622_g1_i2_2792_2946		Psat3g131080.1	AT2G38120.1	| Symbols: AUX1, WAV5, PIR1, MAP1 | Transmembrane amino acid transporter family protein | chr2:15973493-15976792 FORWARD LENGTH=485	3e-134
c28622_g1_i2_2792_2946		Psat4g075400.1	No hits found
c28622_g1_i2_2792_2946		Psat0s798g0040.1	AT4G10770.1	| Symbols: ATOPT7, OPT7 | oligopeptide transporter 7 | chr4:6628646-6632517 REVERSE LENGTH=766	0
c28622_g1_i2_2792_2946		Psat0s2674g0040.1	AT3G52150.2	| Symbols: | RNA-binding (RRM/RBD/RNP motifs) family protein | chr3:19342074-19343090 FORWARD LENGTH=253	6e-95
c28622_g1_i2_2792_2946		Psat0s2674g0040.2	AT3G52150.2	| Symbols: | RNA-binding (RRM/RBD/RNP motifs) family protein | chr3:19342074-19343090 FORWARD LENGTH=253	1e-86
c28622_g1_i2_2792_2946		Psat3g019120.1	AT4G20890.1	| Symbols: TUB9 | tubulin beta-9 chain | chr4:11182218-11183840 FORWARD LENGTH=444	2e-16
c28622_g1_i2_2792_2946		Psat3g019120.2	AT4G20890.1	| Symbols: TUB9 | tubulin beta-9 chain | chr4:11182218-11183840 FORWARD LENGTH=444	2e-16
c28622_g1_i2_2792_2946		Psat1g013080.1	No hits found
c28622_g1_i2_2792_2946		Psat4g109680.1	AT4G19440.2	| Symbols: | Tetratricopeptide repeat (TPR)-like superfamily protein | chr4:10602006-10604483 REVERSE LENGTH=825	0
c28622_g1_i2_2792_2946		Psat2g072720.1	AT1G61150.1	| Symbols: | LisH and RanBPM domains containing protein | chr1:22542928-22544355 FORWARD LENGTH=243	1e-44
c28622_g1_i2_2792_2946		Psat2g072800.1	AT2G21470.1	| Symbols: SAE2, ATSAE2, EMB2764 | SUMO-activating enzyme 2 | chr2:9198752-9202136 FORWARD LENGTH=625	6e-48
c28622_g1_i2_2792_2946		Psat1g161800.1	AT3G17170.1	| Symbols: RFC3 | Translation elongation factor EF1B/ribosomal protein S6 family protein | chr3:5853186-5854853 REVERSE LENGTH=314	2e-83
c28622_g1_i2_2792_2946		Psat4g019480.1	AT2G21470.3	| Symbols: SAE2 | SUMO-activating enzyme 2 | chr2:9198752-9202136 FORWARD LENGTH=628	2e-25
c28622_g1_i2_2792_2946		Psat3g183600.1	AT2G21470.1	| Symbols: SAE2, ATSAE2, EMB2764 | SUMO-activating enzyme 2 | chr2:9198752-9202136 FORWARD LENGTH=625	3e-46
c29557_g1_i1_1445_1599	mir172	Psat5g277120.2	AT2G28550.1	| Symbols: RAP2.7, TOE1 | related to AP2.7 | chr2:12226168-12228251 REVERSE LENGTH=449	2e-110
c29557_g1_i1_1445_1599	mir172	Psat5g277120.1	AT2G28550.3	| Symbols: RAP2.7 | related to AP2.7 | chr2:12226168-12228251 REVERSE LENGTH=464	1e-121
c29557_g1_i1_1445_1599	mir172	Psat0s4250g0040.1	AT3G06590.2	| Symbols: | basic helix-loop-helix (bHLH) DNA-binding superfamily protein | chr3:2054647-2055312 REVERSE LENGTH=221	2e-43
c29557_g1_i1_1445_1599	mir172	Psat0s288g0040.2	AT2G40020.2	| Symbols: | Nucleolar histone methyltransferase-related protein | chr2:16711420-16712592 FORWARD LENGTH=182	1e-06
c29557_g1_i1_1445_1599	mir172	Psat0s288g0040.1	AT2G40020.2	| Symbols: | Nucleolar histone methyltransferase-related protein | chr2:16711420-16712592 FORWARD LENGTH=182	7e-10
c29557_g1_i1_1445_1599	mir172	Psat5g169640.1	No hits found
c29557_g1_i1_1445_1599	mir172	Psat7g161160.3	AT4G21380.1	| Symbols: ARK3, RK3 | receptor kinase 3 | chr4:11389219-11393090 REVERSE LENGTH=850	0
c29557_g1_i1_1445_1599	mir172	Psat7g161160.1	AT4G21380.1	| Symbols: ARK3, RK3 | receptor kinase 3 | chr4:11389219-11393090 REVERSE LENGTH=850	0
c29557_g1_i1_1445_1599	mir172	Psat7g161160.4	AT4G21380.1	| Symbols: ARK3, RK3 | receptor kinase 3 | chr4:11389219-11393090 REVERSE LENGTH=850	0
c29557_g1_i1_1445_1599	mir172	Psat7g161160.2	AT4G21380.1	| Symbols: ARK3, RK3 | receptor kinase 3 | chr4:11389219-11393090 REVERSE LENGTH=850	0
c29557_g1_i1_1445_1599	mir172	Psat2g168760.1	AT4G36920.2	| Symbols: AP2 | Integrase-type DNA-binding superfamily protein | chr4:17400998-17403140 FORWARD LENGTH=432	3e-07
c29557_g1_i1_1445_1599	mir172	Psat3g046960.1	AT2G28550.3	| Symbols: RAP2.7 | related to AP2.7 | chr2:12226168-12228251 REVERSE LENGTH=464	5e-114
c29557_g1_i1_1445_1599	mir172	Psat7g221800.1	AT2G28550.3	| Symbols: RAP2.7 | related to AP2.7 | chr2:12226168-12228251 REVERSE LENGTH=464	6e-126
c29557_g1_i1_1445_1599	mir172	Psat2g168720.2	AT4G36920.2	| Symbols: AP2 | Integrase-type DNA-binding superfamily protein | chr4:17400998-17403140 FORWARD LENGTH=432	2e-132
c29557_g1_i1_1445_1599	mir172	Psat2g168720.1	AT4G36920.2	| Symbols: AP2 | Integrase-type DNA-binding superfamily protein | chr4:17400998-17403140 FORWARD LENGTH=432	2e-132
c29557_g1_i1_1445_1599	mir172	Psat4g085680.1	AT4G36920.2	| Symbols: AP2 | Integrase-type DNA-binding superfamily protein | chr4:17400998-17403140 FORWARD LENGTH=432	2e-126
c29557_g1_i1_1445_1599	mir172	Psat7g161200.1	AT4G27290.1	| Symbols: | S-locus lectin protein kinase family protein | chr4:13666281-13669202 FORWARD LENGTH=783	0
c29557_g1_i1_1445_1599	mir172	Psat7g187800.1	AT2G27460.1	| Symbols: | sec23/sec24 transport family protein | chr2:11740670-11744867 FORWARD LENGTH=745	0
c29557_g1_i1_1445_1599	mir172	Psat7g166360.1	AT1G68810.1	| Symbols: | basic helix-loop-helix (bHLH) DNA-binding superfamily protein | chr1:25861289-25862882 FORWARD LENGTH=368	2e-34
c29557_g1_i1_1445_1599	mir172	Psat5g001120.1	AT5G17690.1	| Symbols: TFL2, LHP1 | like heterochromatin protein (LHP1) | chr5:5827504-5829537 REVERSE LENGTH=445	3e-30
c29557_g1_i1_1445_1599	mir172	Psat6g161880.1	AT1G02610.1	| Symbols: | RING/FYVE/PHD zinc finger superfamily protein | chr1:553181-555854 REVERSE LENGTH=221	8e-63
c29557_g1_i1_1445_1599	mir172	Psat5g077680.1	AT3G49240.1	| Symbols: emb1796 | Pentatricopeptide repeat (PPR) superfamily protein | chr3:18256086-18257975 FORWARD LENGTH=629	0
c29557_g1_i1_1445_1599	mir172	Psat7g086560.1	AT1G65810.1	| Symbols: | P-loop containing nucleoside triphosphate hydrolases superfamily protein | chr1:24477043-24480728 REVERSE LENGTH=1050	0
c29557_g1_i1_1445_1599	mir172	Psat5g127160.1	AT3G26390.1	| Symbols: | unknown protein; BEST Arabidopsis thaliana protein match is: unknown protein (TAIR:AT2G39782.1);Has 16 Blast hits to 16 proteins in 4 species: Archae - 0;Bacteria - 0; Metazoa - 0; Fungi - 0; Plants - 16; Viruses- 0; Other Eukaryotes - 0 (source: NCBI BLink). | chr3:9663450-9663950 REVERSE LENGTH=166	2e-08
c29557_g1_i1_1445_1599	mir172	Psat5g248360.2	AT4G27290.1	| Symbols: | S-locus lectin protein kinase family protein | chr4:13666281-13669202 FORWARD LENGTH=783	0
c29557_g1_i1_1445_1599	mir172	Psat5g248360.1	AT4G27290.1	| Symbols: | S-locus lectin protein kinase family protein | chr4:13666281-13669202 FORWARD LENGTH=783	0
c29557_g1_i1_1445_1599	mir172	Psat3g054960.1	AT3G53400.1	| Symbols: | BEST Arabidopsis thaliana protein match is: conserved peptide upstream open reading frame 47 (TAIR:AT5G03190.1);Has 285 Blast hits to 285 proteins in 23 species:Archae - 0; Bacteria - 0; Metazoa - 1; Fungi - 0; Plants- 279; Viruses - 0; Other Eukaryotes - 5 (source: NCBI BLink). | chr3:19798526-19799926 FORWARD LENGTH=466	2e-78
c29557_g1_i1_1445_1599	mir172	Psat3g142040.1	AT3G24650.1	| Symbols: ABI3, SIS10 | AP2/B3-like transcriptional factor family protein | chr3:8997911-9000780 FORWARD LENGTH=720	6e-162
c29557_g1_i1_1445_1599	mir172	Psat7g031320.1	AT5G41410.1	| Symbols: BEL1 | POX (plant homeobox) family protein | chr5:16580424-16583770 FORWARD LENGTH=611	2e-129
c29557_g1_i1_1445_1599	mir172	Psat5g247160.2	AT5G54250.2	| Symbols: ATCNGC4, CNGC4, HLM1, DND2 | cyclic nucleotide-gated cation channel 4 | chr5:22025684-22029971 REVERSE LENGTH=694	0
c29557_g1_i1_1445_1599	mir172	Psat5g247160.1	AT5G54250.2	| Symbols: ATCNGC4, CNGC4, HLM1, DND2 | cyclic nucleotide-gated cation channel 4 | chr5:22025684-22029971 REVERSE LENGTH=694	0
c29557_g1_i1_1445_1599	mir172	Psat7g006360.1	AT4G30700.1	| Symbols: | Pentatricopeptide repeat (PPR) superfamily protein | chr4:14962617-14964995 REVERSE LENGTH=792	0
c29557_g1_i1_1445_1599	mir172	Psat6g173000.2	AT5G04410.1	| Symbols: NAC2, anac078 | NAC domain containing protein 2 | chr5:1243980-1246416 FORWARD LENGTH=567	2e-13
c29557_g1_i1_1445_1599	mir172	Psat6g173000.1	AT3G10500.1	| Symbols: anac053, NAC053 | NAC domain containing protein 53 | chr3:3271718-3273887 FORWARD LENGTH=549	1e-76
c29557_g1_i1_1445_1599	mir172	Psat1g189640.4	AT3G60500.3	| Symbols: CER7 | 3'-5'-exoribonuclease family protein | chr3:22354245-22356440 FORWARD LENGTH=438	1e-155
c29557_g1_i1_1445_1599	mir172	Psat1g189640.3	AT3G60500.3	| Symbols: CER7 | 3'-5'-exoribonuclease family protein | chr3:22354245-22356440 FORWARD LENGTH=438	1e-155
c29557_g1_i1_1445_1599	mir172	Psat1g189640.2	AT3G60500.3	| Symbols: CER7 | 3'-5'-exoribonuclease family protein | chr3:22354245-22356440 FORWARD LENGTH=438	2e-174
c29557_g1_i1_1445_1599	mir172	Psat1g189640.5	AT3G60500.3	| Symbols: CER7 | 3'-5'-exoribonuclease family protein | chr3:22354245-22356440 FORWARD LENGTH=438	0
c29557_g1_i1_1445_1599	mir172	Psat1g189640.1	AT3G60500.3	| Symbols: CER7 | 3'-5'-exoribonuclease family protein | chr3:22354245-22356440 FORWARD LENGTH=438	0
c29557_g1_i1_1445_1599	mir172	Psat3g164160.1	No hits found
c29557_g1_i1_1445_1599	mir172	Psat6g072560.1	AT4G35130.1	| Symbols: | Tetratricopeptide repeat (TPR)-like superfamily protein | chr4:16721084-16723498 REVERSE LENGTH=804	9e-123
c29557_g1_i1_1445_1599	mir172	Psat4g144800.1	AT3G54440.1	| Symbols: | glycoside hydrolase family 2 protein | chr3:20148494-20157019 REVERSE LENGTH=1107	0
c29557_g1_i1_1445_1599	mir172	Psat1g203000.1	AT1G28420.1	| Symbols: HB-1 | homeobox-1 | chr1:9979936-9987460 FORWARD LENGTH=1705	0
c29557_g1_i1_1445_1599	mir172	Psat5g012240.1	AT1G20300.1	| Symbols: | Pentatricopeptide repeat (PPR) superfamily protein | chr1:7029701-7031314 FORWARD LENGTH=537	0
c29557_g1_i1_1445_1599	mir172	Psat5g176720.1	AT5G55200.1	| Symbols: | Co-chaperone GrpE family protein | chr5:22394705-22396335 FORWARD LENGTH=302	5e-100
c29557_g1_i1_1445_1599	mir172	Psat5g049800.1	AT1G70320.1	| Symbols: UPL2 | ubiquitin-protein ligase 2 | chr1:26488745-26501281 REVERSE LENGTH=3658	0
c29557_g1_i1_1445_1599	mir172	Psat3g206320.1	No hits found
c29557_g1_i1_1445_1599	mir172	Psat1g033840.1	AT1G42550.1	| Symbols: PMI1 | plastid movement impaired1 | chr1:15977131-15979734 FORWARD LENGTH=843	0
c29557_g1_i1_1445_1599	mir172	Psat7g004160.1	AT1G42550.1	| Symbols: PMI1 | plastid movement impaired1 | chr1:15977131-15979734 FORWARD LENGTH=843	0
c29557_g1_i1_1445_1599	mir172	Psat5g027760.1	AT2G25660.1	| Symbols: emb2410 | embryo defective 2410 | chr2:10916456-10927390 REVERSE LENGTH=2166	0
c29768_g5_i1_1383_1765		Psat6g000880.1	AT2G47730.1	| Symbols: ATGSTF8, ATGSTF5, GST6, GSTF8 | glutathione S-transferase phi 8 | chr2:19558213-19559266 FORWARD LENGTH=263	5e-61
c29768_g5_i1_1383_1765		Psat0s2528g0080.1	AT1G01580.1	| Symbols: FRO2, FRD1, ATFRO2 | ferric reduction oxidase 2 | chr1:209395-212810 FORWARD LENGTH=725	0
c29768_g5_i1_1383_1765		Psat1g139960.1	AT5G56950.1	| Symbols: NFA03, NFA3, NAP1;3 | nucleosome assembly protein 1;3 | chr5:23032618-23035299 FORWARD LENGTH=374	2e-127
c29768_g5_i1_1383_1765		Psat5g150360.2	AT5G58370.2	| Symbols: | P-loop containing nucleoside triphosphate hydrolases superfamily protein | chr5:23593358-23595645 FORWARD LENGTH=465	2e-153
c29768_g5_i1_1383_1765		Psat5g150360.1	AT5G58370.2	| Symbols: | P-loop containing nucleoside triphosphate hydrolases superfamily protein | chr5:23593358-23595645 FORWARD LENGTH=465	4e-168
c29768_g5_i1_1383_1765		Psat5g150360.3	AT5G58370.2	| Symbols: | P-loop containing nucleoside triphosphate hydrolases superfamily protein | chr5:23593358-23595645 FORWARD LENGTH=465	6e-148
c29768_g5_i1_1383_1765		Psat2g006440.1	AT5G56000.1	| Symbols: Hsp81.4, AtHsp90.4 | HEAT SHOCK PROTEIN 81.4 | chr5:22677602-22680067 REVERSE LENGTH=699	0
c29768_g5_i1_1383_1765		Psat3g194160.1	AT5G11390.1	| Symbols: WIT1 | WPP domain-interacting protein 1 | chr5:3633971-3636418 FORWARD LENGTH=703	3e-113
c29768_g5_i1_1383_1765		Psat3g194160.2	AT5G11390.1	| Symbols: WIT1 | WPP domain-interacting protein 1 | chr5:3633971-3636418 FORWARD LENGTH=703	5e-91
c29768_g5_i1_1383_1765		Psat6g148240.1	AT1G08820.2	| Symbols: VAP27-2 | vamp/synaptobrevin-associated protein 27-2 | chr1:2821810-2824412 REVERSE LENGTH=386	2e-81
c29768_g5_i1_1383_1765		Psat6g148240.2	AT1G08820.2	| Symbols: VAP27-2 | vamp/synaptobrevin-associated protein 27-2 | chr1:2821810-2824412 REVERSE LENGTH=386	2e-81
c29768_g5_i1_1383_1765		Psat1g074680.1	AT5G39865.1	| Symbols: | Glutaredoxin family protein | chr5:15965560-15966732 REVERSE LENGTH=390	4e-84
c29768_g5_i1_1383_1765		Psat4g150320.1	AT2G45540.1	| Symbols: | WD-40 repeat family protein / beige-related | chr2:18757881-18772229 REVERSE LENGTH=2946	0
c29768_g5_i1_1383_1765		Psat2g001920.1	AT4G12650.1	| Symbols: | Endomembrane protein 70 protein family | chr4:7468207-7470165 REVERSE LENGTH=652	0
c29768_g5_i1_1383_1765		Psat0s1566g0120.1	AT4G12650.1	| Symbols: | Endomembrane protein 70 protein family | chr4:7468207-7470165 REVERSE LENGTH=652	0
c29768_g5_i1_1383_1765		Psat6g029760.1	AT4G32420.3	| Symbols: | Cyclophilin-like peptidyl-prolyl cis-trans isomerase family protein | chr4:15647550-15652103 REVERSE LENGTH=837	3e-84
c29768_g5_i1_1383_1765		Psat1g167680.1	AT4G02510.1	| Symbols: TOC159, TOC86, PPI2, TOC160, ATTOC159 | translocon at the outer envelope membrane of chloroplasts 159 | chr4:1104766-1109360 FORWARD LENGTH=1503	5e-94
c29768_g5_i1_1383_1765		Psat5g020520.1	AT4G32870.1	| Symbols: | Polyketide cyclase/dehydrase and lipid transport superfamily protein | chr4:15862168-15862641 FORWARD LENGTH=157	2e-51
c29768_g5_i1_1383_1765		Psat4g200000.1	No hits found
c29768_g5_i1_1383_1765		Psat7g014880.1	No hits found
c29768_g5_i1_1383_1765		Psat1g118560.1	No hits found
c29768_g5_i1_1383_1765		Psat1g215600.1	No hits found
c29768_g5_i1_1383_1765		Psat4g058960.1	AT4G10790.1	| Symbols: | UBX domain-containing protein | chr4:6640752-6643035 REVERSE LENGTH=480	2e-72
c29768_g5_i1_1383_1765		Psat4g058960.2	AT4G10790.1	| Symbols: | UBX domain-containing protein | chr4:6640752-6643035 REVERSE LENGTH=480	1e-43
c29768_g5_i1_1383_1765		Psat5g082520.1	AT3G14205.1	| Symbols: | Phosphoinositide phosphatase family protein | chr3:4716008-4720524 REVERSE LENGTH=808	0
c29768_g5_i1_1383_1765		Psat5g082520.5	AT3G14205.1	| Symbols: | Phosphoinositide phosphatase family protein | chr3:4716008-4720524 REVERSE LENGTH=808	0
c29768_g5_i1_1383_1765		Psat5g082520.4	AT5G20840.1	| Symbols: | Phosphoinositide phosphatase family protein | chr5:7061638-7068572 REVERSE LENGTH=831	0
c29768_g5_i1_1383_1765		Psat5g082520.3	AT5G20840.1	| Symbols: | Phosphoinositide phosphatase family protein | chr5:7061638-7068572 REVERSE LENGTH=831	6e-128
c29768_g5_i1_1383_1765		Psat2g094160.1	AT3G03670.1	| Symbols: | Peroxidase superfamily protein | chr3:901985-903349 REVERSE LENGTH=321	2e-71
c29768_g5_i1_1383_1765		Psat0s1952g0120.1	AT2G37330.1	| Symbols: ALS3 | aluminum sensitive 3 | chr2:15669190-15670172 FORWARD LENGTH=273	9e-152
c29768_g5_i1_1383_1765		Psat6g078720.2	AT5G03730.1	| Symbols: CTR1, SIS1, AtCTR1 | Protein kinase superfamily protein | chr5:974958-979660 REVERSE LENGTH=821	0
c29768_g5_i1_1383_1765		Psat6g078720.1	AT5G03730.1	| Symbols: CTR1, SIS1, AtCTR1 | Protein kinase superfamily protein | chr5:974958-979660 REVERSE LENGTH=821	0
c29768_g5_i1_1383_1765		Psat1g176320.1	AT3G51970.1	| Symbols: ATSAT1, ASAT1, ATASAT1 | acyl-CoA sterol acyl transferase 1 | chr3:19284420-19285457 FORWARD LENGTH=345	3e-84
c29768_g5_i1_1383_1765		Psat1g205320.1	No hits found
c29768_g5_i1_1383_1765		Psat1g047560.1	AT5G25930.1	| Symbols: | Protein kinase family protein with leucine-rich repeat domain | chr5:9050880-9053978 FORWARD LENGTH=1005	0
c29768_g5_i1_1383_1765		Psat6g041720.1	AT1G44446.1	| Symbols: CH1, ATCAO, CAO | Pheophorbide a oxygenase family protein with Rieske [2Fe-2S] domain | chr1:16848664-16851152 REVERSE LENGTH=536	0
c29768_g5_i1_1383_1765		Psat6g041720.2	AT1G44446.1	| Symbols: CH1, ATCAO, CAO | Pheophorbide a oxygenase family protein with Rieske [2Fe-2S] domain | chr1:16848664-16851152 REVERSE LENGTH=536	0
c29768_g5_i1_1383_1765		Psat6g125760.1	No hits found
c29768_g5_i1_1383_1765		Psat4g173920.1	AT4G16110.1	| Symbols: ARR2, RR2 | response regulator 2 | chr4:9112979-9115785 FORWARD LENGTH=664	5e-46
c29768_g5_i1_1383_1765		Psat7g235640.1	AT4G16110.1	| Symbols: ARR2, RR2 | response regulator 2 | chr4:9112979-9115785 FORWARD LENGTH=664	2e-30
c29768_g5_i1_1383_1765		Psat7g216280.1	AT2G01760.1	| Symbols: ARR14, RR14 | response regulator 14 | chr2:333041-334514 FORWARD LENGTH=382	4e-37
c29768_g5_i1_1383_1765		Psat7g235520.1	AT3G16857.2	| Symbols: ARR1, RR1 | response regulator 1 | chr3:5756113-5759139 FORWARD LENGTH=690	5e-27
c29768_g5_i1_1383_1765		Psat7g216280.2	AT2G01760.1	| Symbols: ARR14, RR14 | response regulator 14 | chr2:333041-334514 FORWARD LENGTH=382	6e-28
c29768_g5_i1_1383_1765		Psat1g083320.1	AT3G27350.1	| Symbols: | unknown protein; FUNCTIONS IN: molecular_function unknown; INVOLVED IN: biological_process unknown;LOCATED IN: plasma membrane; EXPRESSED IN: 24 plant structures;EXPRESSED DURING: 15 growth stages; BEST Arabidopsis thaliana protein match is: unknown protein (TAIR:AT5G40700.1);Has 230 Blast hits to 202 proteins in 35 species: Archae- 0; Bacteria - 3; Metazoa - 77; Fungi - 4; Plants - …	7e-33
c29768_g5_i1_1383_1765		Psat3g091320.1	No hits found
c29768_g5_i1_1383_1765		Psat4g154840.3	AT1G31870.2	| Symbols: | unknown protein; FUNCTIONS IN: molecular_function unknown; INVOLVED IN: biological_process unknown;LOCATED IN: cytosol, nucleus; EXPRESSED IN: 25 plant structures;EXPRESSED DURING: 15 growth stages; CONTAINS InterPro DOMAIN/s: Protein of unknown function DUF2050, pre-mRNA-splicing factor (InterPro:IPR018609); Has 35333 Blast hits to 34131 proteins in 2444 species: Archae - 798; Bacte…	6e-156
c29768_g5_i1_1383_1765		Psat4g154840.2	AT1G31870.2	| Symbols: | unknown protein; FUNCTIONS IN: molecular_function unknown; INVOLVED IN: biological_process unknown;LOCATED IN: cytosol, nucleus; EXPRESSED IN: 25 plant structures;EXPRESSED DURING: 15 growth stages; CONTAINS InterPro DOMAIN/s: Protein of unknown function DUF2050, pre-mRNA-splicing factor (InterPro:IPR018609); Has 35333 Blast hits to 34131 proteins in 2444 species: Archae - 798; Bacte…	3e-155
c29768_g5_i1_1383_1765		Psat4g154840.1	AT1G31870.2	| Symbols: | unknown protein; FUNCTIONS IN: molecular_function unknown; INVOLVED IN: biological_process unknown;LOCATED IN: cytosol, nucleus; EXPRESSED IN: 25 plant structures;EXPRESSED DURING: 15 growth stages; CONTAINS InterPro DOMAIN/s: Protein of unknown function DUF2050, pre-mRNA-splicing factor (InterPro:IPR018609); Has 35333 Blast hits to 34131 proteins in 2444 species: Archae - 798; Bacte…	7e-152
c29768_g5_i1_1383_1765		Psat4g000840.1	AT1G09640.1	| Symbols: | Translation elongation factor EF1B, gamma chain | chr1:3120162-3122152 FORWARD LENGTH=414	0
c29768_g5_i1_1383_1765		Psat4g000840.2	AT1G09640.1	| Symbols: | Translation elongation factor EF1B, gamma chain | chr1:3120162-3122152 FORWARD LENGTH=414	0
c29768_g5_i1_1383_1765		Psat1g052840.1	AT1G09760.1	| Symbols: U2A' | U2 small nuclear ribonucleoprotein A | chr1:3159476-3161603 REVERSE LENGTH=249	6e-131
c29768_g5_i1_1383_1765		Psat1g003600.1	AT1G56090.1	| Symbols: | Tetratricopeptide repeat (TPR)-like superfamily protein | chr1:20977989-20979185 REVERSE LENGTH=272	3e-91
c29768_g5_i1_1383_1765		Psat4g039400.2	AT5G20170.1	| Symbols: | RNA polymerase II transcription mediators | chr5:6807554-6810729 REVERSE LENGTH=653	0
c29768_g5_i1_1383_1765		Psat4g039400.1	AT5G20170.1	| Symbols: | RNA polymerase II transcription mediators | chr5:6807554-6810729 REVERSE LENGTH=653	0
c29768_g5_i1_1383_1765		Psat4g039400.3	AT5G20170.1	| Symbols: | RNA polymerase II transcription mediators | chr5:6807554-6810729 REVERSE LENGTH=653	0
c29768_g5_i1_1383_1765		Psat3g044520.2	AT2G37080.1	| Symbols: RIP3 | ROP interactive partner 3 | chr2:15581565-15584057 REVERSE LENGTH=583	5e-157
c29768_g5_i1_1383_1765		Psat3g044520.3	AT2G37080.1	| Symbols: RIP3 | ROP interactive partner 3 | chr2:15581565-15584057 REVERSE LENGTH=583	5e-157
c29768_g5_i1_1383_1765		Psat3g044520.1	AT2G37080.1	| Symbols: RIP3 | ROP interactive partner 3 | chr2:15581565-15584057 REVERSE LENGTH=583	5e-157
c29768_g5_i1_1383_1765		Psat5g189200.1	AT3G10260.2	| Symbols: | Reticulon family protein | chr3:3171413-3172508 REVERSE LENGTH=247	3e-102
c29768_g5_i1_1383_1765		Psat1g170800.1	AT2G44200.1	| Symbols: | CBF1-interacting co-repressor CIR, N-terminal;Pre-mRNA splicing factor | chr2:18276302-18278240 FORWARD LENGTH=493	1e-119
c29768_g5_i1_1383_1765		Psat4g094640.1	AT4G36520.1	| Symbols: | Chaperone DnaJ-domain superfamily protein | chr4:17230589-17235435 REVERSE LENGTH=1422	5e-100
c29768_g5_i1_1383_1765		Psat3g196760.1	AT3G54320.3	| Symbols: WRI1, WRI, ASML1 | Integrase-type DNA-binding superfamily protein | chr3:20114809-20118473 FORWARD LENGTH=430	5e-92
c29768_g5_i1_1383_1765		Psat1g195440.1	AT3G62470.1	| Symbols: | Pentatricopeptide repeat (PPR) superfamily protein | chr3:23106600-23108399 REVERSE LENGTH=599	0
c29768_g5_i1_1383_1765		Psat7g135120.1	AT3G52250.1	| Symbols: | Duplicated homeodomain-like superfamily protein | chr3:19376629-19383100 FORWARD LENGTH=1656	8e-45
c29768_g5_i1_1383_1765		Psat5g035560.1	AT4G33100.1	| Symbols: | CONTAINS InterPro DOMAIN/s: Mitochondrial distribution/morphology family 35/apoptosis (InterPro:IPR007918);Has 214 Blast hits to 214 proteins in 102 species:Archae - 0; Bacteria - 0; Metazoa - 110; Fungi - 69; Plants- 29; Viruses - 0; Other Eukaryotes - 6 (source: NCBI BLink).| chr4:15971701-15972342 FORWARD LENGTH=92	2e-30
c29768_g5_i1_1383_1765		Psat0s1849g0080.1	AT5G57660.1	| Symbols: ATCOL5, COL5 | CONSTANS-like 5 | chr5:23355573-23356729 FORWARD LENGTH=355	3e-119
c29768_g5_i1_1383_1765		Psat2g184920.1	AT5G26110.1	| Symbols: | Protein kinase superfamily protein | chr5:9118239-9119352 REVERSE LENGTH=226	3e-125
c29768_g5_i1_1383_1765		Psat1g189680.1	No hits found
c29768_g5_i1_1383_1765		Psat5g141800.1	No hits found
c29768_g5_i1_1383_1765		Psat5g033400.1	AT5G25100.1	| Symbols: | Endomembrane protein 70 protein family | chr5:8648374-8651015 REVERSE LENGTH=644	0
c29768_g5_i1_1383_1765		Psat6g025800.1	AT5G10840.1	| Symbols: | Endomembrane protein 70 protein family | chr5:3424910-3427797 REVERSE LENGTH=648	2e-73
c29768_g5_i1_1383_1765		Psat7g006680.1	AT2G24130.1	| Symbols: | Leucine-rich receptor-like protein kinase family protein | chr2:10258148-10261220 FORWARD LENGTH=980	0
c29768_g5_i1_1383_1765		Psat7g089000.1	AT4G19980.1	| Symbols: | unknown protein; FUNCTIONS IN: molecular_function unknown; INVOLVED IN: biological_process unknown;LOCATED IN: chloroplast; EXPRESSED IN: root, pedicel; EXPRESSED DURING: 4 anthesis; Has 30201 Blast hits to 17322 proteins in 780 species: Archae - 12; Bacteria - 1396; Metazoa- 17338; Fungi - 3422; Plants - 5037; Viruses - 0; Other Eukaryotes- 2996 (source: NCBI BLink). | chr4:10828153…	2e-15
c29768_g5_i1_1383_1765		Psat0s2411g0120.1	No hits found
c29768_g5_i1_1383_1765		Psat4g199920.1	AT3G07140.2	| Symbols: | GPI transamidase component Gpi16 subunit family protein | chr3:2261278-2263632 FORWARD LENGTH=643	0
c37943_g1_i1_94_234	mir482	Psat3g026240.1	No hits found
c37943_g1_i1_94_234	mir482	Psat1g218080.1	AT4G33430.1	| Symbols: BAK1, RKS10, SERK3, ELG, ATSERK3, ATBAK1 | BRI1-associated receptor kinase | chr4:16086654-16090288 REVERSE LENGTH=615	0
c37943_g1_i1_94_234	mir482	Psat6g210160.2	AT4G05200.1	| Symbols: CRK25 | cysteine-rich RLK (RECEPTOR-like protein kinase) 25 | chr4:2679793-2682309 REVERSE LENGTH=675	1e-144
c37943_g1_i1_94_234	mir482	Psat6g210160.1	AT4G05200.1	| Symbols: CRK25 | cysteine-rich RLK (RECEPTOR-like protein kinase) 25 | chr4:2679793-2682309 REVERSE LENGTH=675	0
c37943_g1_i1_94_234	mir482	Psat2g151040.1	AT1G47670.1	| Symbols: | Transmembrane amino acid transporter family protein | chr1:17536834-17539486 REVERSE LENGTH=519	0
c37943_g1_i1_94_234	mir482	Psat6g075320.4	AT1G08080.1	| Symbols: ATACA7, ACA7 | alpha carbonic anhydrase 7 | chr1:2517022-2518546 REVERSE LENGTH=275	6e-87
c37943_g1_i1_94_234	mir482	Psat6g075320.5	AT1G08080.1	| Symbols: ATACA7, ACA7 | alpha carbonic anhydrase 7 | chr1:2517022-2518546 REVERSE LENGTH=275	3e-79
c37943_g1_i1_94_234	mir482	Psat6g075320.3	AT1G08080.1	| Symbols: ATACA7, ACA7 | alpha carbonic anhydrase 7 | chr1:2517022-2518546 REVERSE LENGTH=275	4e-79
c37943_g1_i1_94_234	mir482	Psat6g075320.2	AT1G08080.1	| Symbols: ATACA7, ACA7 | alpha carbonic anhydrase 7 | chr1:2517022-2518546 REVERSE LENGTH=275	4e-79
c37943_g1_i1_94_234	mir482	Psat6g075320.1	AT1G08080.1	| Symbols: ATACA7, ACA7 | alpha carbonic anhydrase 7 | chr1:2517022-2518546 REVERSE LENGTH=275	4e-79
c37943_g1_i1_94_234	mir482	Psat6g075320.6	AT1G08080.1	| Symbols: ATACA7, ACA7 | alpha carbonic anhydrase 7 | chr1:2517022-2518546 REVERSE LENGTH=275	1e-73
c49474_g1_i1_1_82	mir169_6	Psat7g022760.4	AT4G24040.1	| Symbols: ATTRE1, TRE1 | trehalase 1 | chr4:12488242-12491060 FORWARD LENGTH=626	1e-159
c49474_g1_i1_1_82	mir169_6	Psat7g022760.7	AT4G24040.1	| Symbols: ATTRE1, TRE1 | trehalase 1 | chr4:12488242-12491060 FORWARD LENGTH=626	1e-159
c49474_g1_i1_1_82	mir169_6	Psat7g022760.3	AT4G24040.1	| Symbols: ATTRE1, TRE1 | trehalase 1 | chr4:12488242-12491060 FORWARD LENGTH=626	7e-169
c49474_g1_i1_1_82	mir169_6	Psat7g022760.8	AT4G24040.1	| Symbols: ATTRE1, TRE1 | trehalase 1 | chr4:12488242-12491060 FORWARD LENGTH=626	7e-160
c49474_g1_i1_1_82	mir169_6	Psat7g022760.6	AT4G24040.1	| Symbols: ATTRE1, TRE1 | trehalase 1 | chr4:12488242-12491060 FORWARD LENGTH=626	7e-160
c49474_g1_i1_1_82	mir169_6	Psat7g022760.5	AT4G24040.1	| Symbols: ATTRE1, TRE1 | trehalase 1 | chr4:12488242-12491060 FORWARD LENGTH=626	7e-169
c49474_g1_i1_1_82	mir169_6	Psat7g022760.1	AT4G24040.1	| Symbols: ATTRE1, TRE1 | trehalase 1 | chr4:12488242-12491060 FORWARD LENGTH=626	0
c49474_g1_i1_1_82	mir169_6	Psat7g022760.2	AT4G24040.1	| Symbols: ATTRE1, TRE1 | trehalase 1 | chr4:12488242-12491060 FORWARD LENGTH=626	0
c49474_g1_i1_1_82	mir169_6	Psat6g044920.1	AT2G01630.1	| Symbols: | O-Glycosyl hydrolases family 17 protein | chr2:279541-281955 REVERSE LENGTH=501	0
c53463_g1_i1_629_729	mir156	Psat3g164360.1	AT5G50570.2	| Symbols: SPL13A, SPL13 | Squamosa promoter-binding protein-like (SBP domain) transcription factor family protein| chr5:20582555-20583791 REVERSE LENGTH=359	4e-43
c53463_g1_i1_629_729	mir156	Psat3g164360.2	AT5G50570.2	| Symbols: SPL13A, SPL13 | Squamosa promoter-binding protein-like (SBP domain) transcription factor family protein| chr5:20582555-20583791 REVERSE LENGTH=359	4e-43
c53463_g1_i1_629_729	mir156	Psat2g133080.1	AT1G69170.1	| Symbols: | Squamosa promoter-binding protein-like (SBP domain) transcription factor family protein | chr1:26005626-26007041 FORWARD LENGTH=405	4e-61
c53463_g1_i1_629_729	mir156	Psat4g046440.1	AT1G69170.1	| Symbols: | Squamosa promoter-binding protein-like (SBP domain) transcription factor family protein | chr1:26005626-26007041 FORWARD LENGTH=405	4e-48
c53463_g1_i1_629_729	mir156	Psat4g046440.2	AT1G69170.1	| Symbols: | Squamosa promoter-binding protein-like (SBP domain) transcription factor family protein | chr1:26005626-26007041 FORWARD LENGTH=405	4e-48
c53463_g1_i1_629_729	mir156	Psat5g096720.4	AT5G43270.1	| Symbols: SPL2 | squamosa promoter binding protein-like 2 | chr5:17360527-17362143 REVERSE LENGTH=419	7e-57
c53463_g1_i1_629_729	mir156	Psat7g077080.3	AT5G43270.1	| Symbols: SPL2 | squamosa promoter binding protein-like 2 | chr5:17360527-17362143 REVERSE LENGTH=419	7e-54
c53463_g1_i1_629_729	mir156	Psat7g077080.1	AT5G43270.1	| Symbols: SPL2 | squamosa promoter binding protein-like 2 | chr5:17360527-17362143 REVERSE LENGTH=419	7e-54
c53463_g1_i1_629_729	mir156	Psat7g077080.2	AT5G43270.1	| Symbols: SPL2 | squamosa promoter binding protein-like 2 | chr5:17360527-17362143 REVERSE LENGTH=419	7e-54
c53463_g1_i1_629_729	mir156	Psat5g096720.2	AT5G43270.1	| Symbols: SPL2 | squamosa promoter binding protein-like 2 | chr5:17360527-17362143 REVERSE LENGTH=419	3e-59
c53463_g1_i1_629_729	mir156	Psat5g096720.1	AT5G43270.1	| Symbols: SPL2 | squamosa promoter binding protein-like 2 | chr5:17360527-17362143 REVERSE LENGTH=419	3e-59
c53463_g1_i1_629_729	mir156	Psat5g096720.3	AT5G43270.1	| Symbols: SPL2 | squamosa promoter binding protein-like 2 | chr5:17360527-17362143 REVERSE LENGTH=419	3e-59
c53463_g1_i1_629_729	mir156	Psat1g127000.2	AT1G69170.1	| Symbols: | Squamosa promoter-binding protein-like (SBP domain) transcription factor family protein | chr1:26005626-26007041 FORWARD LENGTH=405	9e-48
c53463_g1_i1_629_729	mir156	Psat1g127000.1	AT1G69170.1	| Symbols: | Squamosa promoter-binding protein-like (SBP domain) transcription factor family protein | chr1:26005626-26007041 FORWARD LENGTH=405	9e-48
c53463_g1_i1_629_729	mir156	Psat5g052160.1	AT5G50570.2	| Symbols: SPL13A, SPL13 | Squamosa promoter-binding protein-like (SBP domain) transcription factor family protein| chr5:20582555-20583791 REVERSE LENGTH=359	1e-67
c53463_g1_i1_629_729	mir156	Psat3g069560.1	AT2G42200.1	| Symbols: SPL9, AtSPL9 | squamosa promoter binding protein-like 9 | chr2:17587601-17589451 FORWARD LENGTH=375	5e-65
c53463_g1_i1_629_729	mir156	Psat6g101960.1	AT2G42200.1	| Symbols: SPL9, AtSPL9 | squamosa promoter binding protein-like 9 | chr2:17587601-17589451 FORWARD LENGTH=375	2e-54
c53463_g1_i1_629_729	mir156	Psat3g157680.1	AT1G27360.4	| Symbols: SPL11 | squamosa promoter-like 11 | chr1:9502139-9503715 FORWARD LENGTH=393	7e-38
c53463_g1_i1_629_729	mir156	Psat2g077800.2	No hits found
c53463_g1_i1_629_729	mir156	Psat2g077800.3	No hits found
c53463_g1_i1_629_729	mir156	Psat2g077800.1	No hits found
c53463_g1_i1_629_729	mir156	Psat2g190200.1	AT1G76690.1	| Symbols: OPR2, ATOPR2 | 12-oxophytodienoate reductase 2 | chr1:28778976-28780355 FORWARD LENGTH=374	0
c53463_g1_i1_629_729	mir156	Psat2g044760.6	AT2G01970.1	| Symbols: | Endomembrane protein 70 protein family | chr2:452197-454819 REVERSE LENGTH=592	0
c53463_g1_i1_629_729	mir156	Psat2g044760.5	AT2G01970.1	| Symbols: | Endomembrane protein 70 protein family | chr2:452197-454819 REVERSE LENGTH=592	0
c53463_g1_i1_629_729	mir156	Psat2g044760.1	AT2G01970.1	| Symbols: | Endomembrane protein 70 protein family | chr2:452197-454819 REVERSE LENGTH=592	0
c53463_g1_i1_629_729	mir156	Psat2g044760.2	AT2G01970.1	| Symbols: | Endomembrane protein 70 protein family | chr2:452197-454819 REVERSE LENGTH=592	0
c53463_g1_i1_629_729	mir156	Psat2g044760.3	AT2G01970.1	| Symbols: | Endomembrane protein 70 protein family | chr2:452197-454819 REVERSE LENGTH=592	0
c53463_g1_i1_629_729	mir156	Psat2g044760.4	AT2G01970.1	| Symbols: | Endomembrane protein 70 protein family | chr2:452197-454819 REVERSE LENGTH=592	0
c53463_g1_i1_629_729	mir156	Psat4g090560.1	AT4G36870.2	| Symbols: BLH2, SAW1 | BEL1-like homeodomain 2 | chr4:17369423-17373723 FORWARD LENGTH=739	5e-177
c53463_g1_i1_629_729	mir156	Psat1g212600.1	AT5G64440.1	| Symbols: AtFAAH, FAAH | fatty acid amide hydrolase | chr5:25766229-25770260 FORWARD LENGTH=607	0
c53463_g1_i1_629_729	mir156	Psat1g212600.2	AT5G64440.1	| Symbols: AtFAAH, FAAH | fatty acid amide hydrolase | chr5:25766229-25770260 FORWARD LENGTH=607	0
c53463_g1_i1_629_729	mir156	Psat0s4610g0040.1	No hits found
c53463_g1_i1_629_729	mir156	Psat5g175080.1	AT5G15280.1	| Symbols: | Pentatricopeptide repeat (PPR) superfamily protein | chr5:4962293-4965976 FORWARD LENGTH=1227	0
c53463_g1_i1_629_729	mir156	Psat4g224640.1	AT4G23180.1	| Symbols: CRK10, RLK4 | cysteine-rich RLK (RECEPTOR-like protein kinase) 10 | chr4:12138171-12140780 FORWARD LENGTH=669	5e-113
c53463_g1_i1_629_729	mir156	Psat7g132840.2	AT5G08470.1	| Symbols: PEX1 | peroxisome 1 | chr5:2735925-2742731 FORWARD LENGTH=1130	0
c53463_g1_i1_629_729	mir156	Psat2g151880.1	AT4G35800.1	| Symbols: NRPB1, RPB1, RNA_POL_II_LSRNA_POL_II_LS, RNA_POL_II_LS | RNA polymerase II large subunit | chr4:16961115-16967892 REVERSE LENGTH=1839	0
c53463_g1_i1_629_729	mir156	Psat3g055760.1	AT4G28600.1	| Symbols: NPGR2 | no pollen germination related 2 | chr4:14130046-14132599 FORWARD LENGTH=739	0
c53463_g1_i1_629_729	mir156	Psat3g055760.2	AT4G28600.1	| Symbols: NPGR2 | no pollen germination related 2 | chr4:14130046-14132599 FORWARD LENGTH=739	0
c53463_g1_i1_629_729	mir156	Psat3g055760.4	AT4G28600.1	| Symbols: NPGR2 | no pollen germination related 2 | chr4:14130046-14132599 FORWARD LENGTH=739	0
c53463_g1_i1_629_729	mir156	Psat3g055760.3	AT4G28600.1	| Symbols: NPGR2 | no pollen germination related 2 | chr4:14130046-14132599 FORWARD LENGTH=739	0
c53463_g1_i1_629_729	mir156	Psat4g104440.1	AT5G66010.1	| Symbols: | RNA-binding (RRM/RBD/RNP motifs) family protein | chr5:26399612-26400753 FORWARD LENGTH=255	3e-129
c53463_g1_i1_629_729	mir156	Psat2g175520.1	No hits found
c53463_g1_i1_629_729	mir156	Psat6g147240.1	AT5G28050.1	| Symbols: | Cytidine/deoxycytidylate deaminase family protein | chr5:10044209-10045755 REVERSE LENGTH=185	4e-49
c5511_g1_i1_78_198	mir166	Psat4g221480.1	AT1G52150.1	| Symbols: ATHB-15, ATHB15, CNA, ICU4 | Homeobox-leucine zipper family protein / lipid-binding START domain-containing protein | chr1:19409913-19413961 REVERSE LENGTH=836	0
c5511_g1_i1_78_198	mir166	Psat5g297000.1	AT1G52150.1	| Symbols: ATHB-15, ATHB15, CNA, ICU4 | Homeobox-leucine zipper family protein / lipid-binding START domain-containing protein | chr1:19409913-19413961 REVERSE LENGTH=836	0
c5511_g1_i1_78_198	mir166	Psat4g221480.2	AT1G52150.3	| Symbols: ATHB-15, ATHB15, CNA, ICU4 | Homeobox-leucine zipper family protein / lipid-binding START domain-containing protein | chr1:19410118-19413961 REVERSE LENGTH=794	0
c5511_g1_i1_78_198	mir166	Psat1g167760.1	AT2G34710.1	| Symbols: PHB, ATHB14, ATHB-14, PHB-1D | Homeobox-leucine zipper family protein / lipid-binding START domain-containing protein | chr2:14639548-14643993 REVERSE LENGTH=852	0
c5511_g1_i1_78_198	mir166	Psat7g225360.1	AT5G60690.1	| Symbols: REV, IFL, IFL1 | Homeobox-leucine zipper family protein / lipid-binding START domain-containing protein| chr5:24397734-24401933 FORWARD LENGTH=842	0
c5511_g1_i1_78_198	mir166	Psat1g167760.2	AT2G34710.1	| Symbols: PHB, ATHB14, ATHB-14, PHB-1D | Homeobox-leucine zipper family protein / lipid-binding START domain-containing protein | chr2:14639548-14643993 REVERSE LENGTH=852	0
c5511_g1_i1_78_198	mir166	Psat5g279960.1	AT5G60690.1	| Symbols: REV, IFL, IFL1 | Homeobox-leucine zipper family protein / lipid-binding START domain-containing protein| chr5:24397734-24401933 FORWARD LENGTH=842	0
c5511_g1_i1_78_198	mir166	Psat5g020800.1	AT4G32880.1	| Symbols: ATHB-8, ATHB8, HB-8 | homeobox gene 8 | chr4:15863587-15867822 REVERSE LENGTH=833	0
chr1LG6_51411458_51411592	mir156	Psat3g164360.1	AT5G50570.2	| Symbols: SPL13A, SPL13 | Squamosa promoter-binding protein-like (SBP domain) transcription factor family protein| chr5:20582555-20583791 REVERSE LENGTH=359	4e-43
chr1LG6_51411458_51411592	mir156	Psat3g164360.2	AT5G50570.2	| Symbols: SPL13A, SPL13 | Squamosa promoter-binding protein-like (SBP domain) transcription factor family protein| chr5:20582555-20583791 REVERSE LENGTH=359	4e-43
chr1LG6_51411458_51411592	mir156	Psat6g101960.1	AT2G42200.1	| Symbols: SPL9, AtSPL9 | squamosa promoter binding protein-like 9 | chr2:17587601-17589451 FORWARD LENGTH=375	2e-54
chr1LG6_51411458_51411592	mir156	Psat3g069560.1	AT2G42200.1	| Symbols: SPL9, AtSPL9 | squamosa promoter binding protein-like 9 | chr2:17587601-17589451 FORWARD LENGTH=375	5e-65
chr1LG6_51411458_51411592	mir156	Psat5g096720.2	AT5G43270.1	| Symbols: SPL2 | squamosa promoter binding protein-like 2 | chr5:17360527-17362143 REVERSE LENGTH=419	3e-59
chr1LG6_51411458_51411592	mir156	Psat5g096720.3	AT5G43270.1	| Symbols: SPL2 | squamosa promoter binding protein-like 2 | chr5:17360527-17362143 REVERSE LENGTH=419	3e-59
chr1LG6_51411458_51411592	mir156	Psat5g096720.1	AT5G43270.1	| Symbols: SPL2 | squamosa promoter binding protein-like 2 | chr5:17360527-17362143 REVERSE LENGTH=419	3e-59
chr1LG6_51411458_51411592	mir156	Psat7g077080.1	AT5G43270.1	| Symbols: SPL2 | squamosa promoter binding protein-like 2 | chr5:17360527-17362143 REVERSE LENGTH=419	7e-54
chr1LG6_51411458_51411592	mir156	Psat7g077080.3	AT5G43270.1	| Symbols: SPL2 | squamosa promoter binding protein-like 2 | chr5:17360527-17362143 REVERSE LENGTH=419	7e-54
chr1LG6_51411458_51411592	mir156	Psat7g077080.2	AT5G43270.1	| Symbols: SPL2 | squamosa promoter binding protein-like 2 | chr5:17360527-17362143 REVERSE LENGTH=419	7e-54
chr1LG6_51411458_51411592	mir156	Psat5g096720.4	AT5G43270.1	| Symbols: SPL2 | squamosa promoter binding protein-like 2 | chr5:17360527-17362143 REVERSE LENGTH=419	7e-57
chr1LG6_51411458_51411592	mir156	Psat2g077800.2	No hits found
chr1LG6_51411458_51411592	mir156	Psat2g077800.3	No hits found
chr1LG6_51411458_51411592	mir156	Psat2g077800.1	No hits found
chr1LG6_51411458_51411592	mir156	Psat3g157680.1	AT1G27360.4	| Symbols: SPL11 | squamosa promoter-like 11 | chr1:9502139-9503715 FORWARD LENGTH=393	7e-38
chr1LG6_51411458_51411592	mir156	Psat5g052160.1	AT5G50570.2	| Symbols: SPL13A, SPL13 | Squamosa promoter-binding protein-like (SBP domain) transcription factor family protein| chr5:20582555-20583791 REVERSE LENGTH=359	1e-67
chr1LG6_51411458_51411592	mir156	Psat1g127000.1	AT1G69170.1	| Symbols: | Squamosa promoter-binding protein-like (SBP domain) transcription factor family protein | chr1:26005626-26007041 FORWARD LENGTH=405	9e-48
chr1LG6_51411458_51411592	mir156	Psat1g127000.2	AT1G69170.1	| Symbols: | Squamosa promoter-binding protein-like (SBP domain) transcription factor family protein | chr1:26005626-26007041 FORWARD LENGTH=405	9e-48
chr1LG6_51411458_51411592	mir156	Psat4g046440.2	AT1G69170.1	| Symbols: | Squamosa promoter-binding protein-like (SBP domain) transcription factor family protein | chr1:26005626-26007041 FORWARD LENGTH=405	4e-48
chr1LG6_51411458_51411592	mir156	Psat4g046440.1	AT1G69170.1	| Symbols: | Squamosa promoter-binding protein-like (SBP domain) transcription factor family protein | chr1:26005626-26007041 FORWARD LENGTH=405	4e-48
chr1LG6_51411458_51411592	mir156	Psat2g133080.1	AT1G69170.1	| Symbols: | Squamosa promoter-binding protein-like (SBP domain) transcription factor family protein | chr1:26005626-26007041 FORWARD LENGTH=405	4e-61
chr1LG6_51411458_51411592	mir156	Psat2g190200.1	AT1G76690.1	| Symbols: OPR2, ATOPR2 | 12-oxophytodienoate reductase 2 | chr1:28778976-28780355 FORWARD LENGTH=374	0
chr1LG6_51411458_51411592	mir156	Psat2g044760.6	AT2G01970.1	| Symbols: | Endomembrane protein 70 protein family | chr2:452197-454819 REVERSE LENGTH=592	0
chr1LG6_51411458_51411592	mir156	Psat2g044760.1	AT2G01970.1	| Symbols: | Endomembrane protein 70 protein family | chr2:452197-454819 REVERSE LENGTH=592	0
chr1LG6_51411458_51411592	mir156	Psat2g044760.5	AT2G01970.1	| Symbols: | Endomembrane protein 70 protein family | chr2:452197-454819 REVERSE LENGTH=592	0
chr1LG6_51411458_51411592	mir156	Psat2g044760.2	AT2G01970.1	| Symbols: | Endomembrane protein 70 protein family | chr2:452197-454819 REVERSE LENGTH=592	0
chr1LG6_51411458_51411592	mir156	Psat2g044760.3	AT2G01970.1	| Symbols: | Endomembrane protein 70 protein family | chr2:452197-454819 REVERSE LENGTH=592	0
chr1LG6_51411458_51411592	mir156	Psat2g044760.4	AT2G01970.1	| Symbols: | Endomembrane protein 70 protein family | chr2:452197-454819 REVERSE LENGTH=592	0
chr1LG6_51411458_51411592	mir156	Psat1g212600.2	AT5G64440.1	| Symbols: AtFAAH, FAAH | fatty acid amide hydrolase | chr5:25766229-25770260 FORWARD LENGTH=607	0
chr1LG6_51411458_51411592	mir156	Psat1g212600.1	AT5G64440.1	| Symbols: AtFAAH, FAAH | fatty acid amide hydrolase | chr5:25766229-25770260 FORWARD LENGTH=607	0
chr1LG6_51411458_51411592	mir156	Psat0s45g0040.1	AT1G48090.1	| Symbols: | calcium-dependent lipid-binding family protein | chr1:17732582-17758194 REVERSE LENGTH=4146	0
chr1LG6_51411458_51411592	mir156	Psat7g132840.2	AT5G08470.1	| Symbols: PEX1 | peroxisome 1 | chr5:2735925-2742731 FORWARD LENGTH=1130	0
chr1LG6_51411458_51411592	mir156	Psat5g175080.1	AT5G15280.1	| Symbols: | Pentatricopeptide repeat (PPR) superfamily protein | chr5:4962293-4965976 FORWARD LENGTH=1227	0
chr1LG6_51411458_51411592	mir156	Psat2g151880.1	AT4G35800.1	| Symbols: NRPB1, RPB1, RNA_POL_II_LSRNA_POL_II_LS, RNA_POL_II_LS | RNA polymerase II large subunit | chr4:16961115-16967892 REVERSE LENGTH=1839	0
chr1LG6_51411458_51411592	mir156	Psat3g055760.1	AT4G28600.1	| Symbols: NPGR2 | no pollen germination related 2 | chr4:14130046-14132599 FORWARD LENGTH=739	0
chr1LG6_51411458_51411592	mir156	Psat3g055760.3	AT4G28600.1	| Symbols: NPGR2 | no pollen germination related 2 | chr4:14130046-14132599 FORWARD LENGTH=739	0
chr1LG6_51411458_51411592	mir156	Psat3g055760.4	AT4G28600.1	| Symbols: NPGR2 | no pollen germination related 2 | chr4:14130046-14132599 FORWARD LENGTH=739	0
chr1LG6_51411458_51411592	mir156	Psat3g055760.2	AT4G28600.1	| Symbols: NPGR2 | no pollen germination related 2 | chr4:14130046-14132599 FORWARD LENGTH=739	0
chr1LG6_51411458_51411592	mir156	Psat1g171040.1	No hits found
chr1LG6_172907582_172907768		Psat5g104600.1	AT3G07700.2	| Symbols: | Protein kinase superfamily protein | chr3:2459696-2463241 REVERSE LENGTH=695	0
chr1LG6_289005926_289006077	mir169_2	Psat4g220360.1	No hits found
chr1LG6_289005926_289006077	mir169_2	Psat6g012560.1	AT5G09890.1	| Symbols: | Protein kinase family protein | chr5:3085810-3088842 REVERSE LENGTH=515	0
chr1LG6_289005926_289006077	mir169_2	Psat4g180280.1	AT1G67120.1	| Symbols: | ATPases;nucleotide binding;ATP binding;nucleoside-triphosphatases;transcription factor binding| chr1:25069727-25095526 REVERSE LENGTH=5393	0
chr1LG6_289005926_289006077	mir169_2	Psat3g208240.1	AT2G33490.1	| Symbols: | hydroxyproline-rich glycoprotein family protein | chr2:14183552-14187666 FORWARD LENGTH=623	0
chr1LG6_289005926_289006077	mir169_2	Psat7g216440.1	AT3G07100.1	| Symbols: ERMO2, SEC24A | Sec23/Sec24 protein transport family protein | chr3:2245689-2250077 REVERSE LENGTH=1038	0
chr1LG6_289005926_289006077	mir169_2	Psat1g131720.1	AT4G33080.1	| Symbols: | AGC (cAMP-dependent, cGMP-dependent and protein kinase C) kinase family protein | chr4:15960146-15964296 FORWARD LENGTH=519	0
chr1LG6_289005926_289006077	mir169_2	Psat1g131720.2	AT4G33080.1	| Symbols: | AGC (cAMP-dependent, cGMP-dependent and protein kinase C) kinase family protein | chr4:15960146-15964296 FORWARD LENGTH=519	0
chr1LG6_289005926_289006077	mir169_2	Psat2g117920.2	AT2G03060.2	| Symbols: AGL30 | AGAMOUS-like 30 | chr2:901614-903569 FORWARD LENGTH=386	5e-96
chr1LG6_289005926_289006077	mir169_2	Psat2g117920.1	AT2G03060.2	| Symbols: AGL30 | AGAMOUS-like 30 | chr2:901614-903569 FORWARD LENGTH=386	5e-96
chr1LG6_289005926_289006077	mir169_2	Psat3g127600.1	AT3G51850.1	| Symbols: CPK13 | calcium-dependent protein kinase 13 | chr3:19232667-19235526 FORWARD LENGTH=528	0
chr1LG6_289005926_289006077	mir169_2	Psat0s2711g0040.1	AT5G07010.1	| Symbols: ATST2A, ST2A | sulfotransferase 2A | chr5:2174960-2176039 REVERSE LENGTH=359	1e-73
chr1LG6_289005926_289006077	mir169_2	Psat0s2711g0160.1	AT5G07010.1	| Symbols: ATST2A, ST2A | sulfotransferase 2A | chr5:2174960-2176039 REVERSE LENGTH=359	1e-117
chr1LG6_289005926_289006077	mir169_2	Psat5g186920.1	AT1G21280.1	| Symbols: | CONTAINS InterPro DOMAIN/s: Retrotransposon gag protein (InterPro:IPR005162); Has 707 Blast hits to 705 proteins in 25 species: Archae - 0; Bacteria - 0; Metazoa- 4; Fungi - 0; Plants - 703; Viruses - 0; Other Eukaryotes- 0 (source: NCBI BLink). | chr1:7447690-7448403 REVERSE LENGTH=237	3e-15
chr1LG6_289005926_289006077	mir169_2	Psat5g157280.1	No hits found
chr1LG6_289005926_289006077	mir169_2	Psat1g182320.1	AT1G03220.1	| Symbols: | Eukaryotic aspartyl protease family protein | chr1:787143-788444 FORWARD LENGTH=433	8e-85
chr1LG6_289005926_289006077	mir169_2	Psat5g225800.1	AT3G23880.1	| Symbols: | F-box and associated interaction domains-containing protein | chr3:8622061-8623155 REVERSE LENGTH=364	3e-26
chr1LG6_289005926_289006077	mir169_2	Psat1g141080.1	AT1G60690.1	| Symbols: | NAD(P)-linked oxidoreductase superfamily protein | chr1:22349892-22351668 REVERSE LENGTH=345	9e-134
chr1LG6_289005926_289006077	mir169_2	Psat1g141080.2	AT1G60690.1	| Symbols: | NAD(P)-linked oxidoreductase superfamily protein | chr1:22349892-22351668 REVERSE LENGTH=345	2e-128
chr1LG6_289005926_289006077	mir169_2	Psat0s3787g0080.1	AT3G22700.1	| Symbols: | F-box and associated interaction domains-containing protein | chr3:8024798-8025814 REVERSE LENGTH=338	4e-13
chr1LG6_289005926_289006077	mir169_2	Psat1g141080.3	AT1G60680.1	| Symbols: | NAD(P)-linked oxidoreductase superfamily protein | chr1:22347824-22349236 REVERSE LENGTH=346	3e-75
chr1LG6_289005926_289006077	mir169_2	Psat6g000400.1	AT1G76680.1	| Symbols: OPR1, ATOPR1 | 12-oxophytodienoate reductase 1 | chr1:28776982-28778271 FORWARD LENGTH=372	1e-179
chr1LG6_289005926_289006077	mir169_2	Psat6g151760.1	No hits found
chr1LG6_289005926_289006077	mir169_2	Psat3g192520.1	AT2G39120.1	| Symbols: | Ubiquitin carboxyl-terminal hydrolase family protein | chr2:16321794-16322957 FORWARD LENGTH=387	1e-166
chr1LG6_289005926_289006077	mir169_2	Psat6g087640.1	AT2G41370.1	| Symbols: BOP2 | Ankyrin repeat family protein / BTB/POZ domain-containing protein | chr2:17238019-17240203 REVERSE LENGTH=491	0
chr1LG6_289005926_289006077	mir169_2	Psat0s2273g0120.1	AT2G03760.1	| Symbols: ST, ATST1, RAR047, ST1, AtSOT1, AtSOT12, SOT12 | sulphotransferase 12 | chr2:1149475-1150455 REVERSE LENGTH=326	3e-111
chr1LG6_289005926_289006077	mir169_2	Psat4g118600.1	AT2G03770.1	| Symbols: | P-loop containing nucleoside triphosphate hydrolases superfamily protein | chr2:1150871-1151845 REVERSE LENGTH=324	2e-108
chr1LG6_289005926_289006077	mir169_2	Psat0s6755g0040.1	AT2G03770.1	| Symbols: | P-loop containing nucleoside triphosphate hydrolases superfamily protein | chr2:1150871-1151845 REVERSE LENGTH=324	4e-86
chr1LG6_289005926_289006077	mir169_2	Psat6g120680.1	AT5G09890.2	| Symbols: | Protein kinase family protein | chr5:3085810-3088842 REVERSE LENGTH=516	4e-50
chr1LG6_289005926_289006077	mir169_2	Psat6g015880.1	AT5G09890.1	| Symbols: | Protein kinase family protein | chr5:3085810-3088842 REVERSE LENGTH=515	1e-130
chr1LG6_289005926_289006077	mir169_2	Psat3g104440.1	No hits found
chr1LG6_289005926_289006077	mir169_2	Psat0s2445g0040.1	AT4G23980.2	| Symbols: ARF9 | auxin response factor 9 | chr4:12451592-12454737 FORWARD LENGTH=636	0
chr1LG6_289005926_289006077	mir169_2	Psat0s2445g0040.2	AT4G23980.2	| Symbols: ARF9 | auxin response factor 9 | chr4:12451592-12454737 FORWARD LENGTH=636	0
chr1LG6_289005926_289006077	mir169_2	Psat6g151800.1	No hits found
chr1LG6_289005926_289006077	mir169_2	Psat3g019400.1	AT1G65440.2	| Symbols: GTB1 | global transcription factor group B1 | chr1:24306908-24314327 REVERSE LENGTH=1642	0
chr1LG6_289005926_289006077	mir169_2	Psat0s3384g0080.1	No hits found
chr1LG6_289005926_289006077	mir169_2	Psat0s3513g0080.1	AT5G24740.1	| Symbols: | Protein of unknown function (DUF1162) | chr5:8470073-8489703 REVERSE LENGTH=3464	0
chr1LG6_289005926_289006077	mir169_2	Psat0s498g0160.3	AT1G20640.2	| Symbols: | Plant regulator RWP-RK family protein | chr1:7155201-7157986 FORWARD LENGTH=844	0
chr1LG6_289005926_289006077	mir169_2	Psat0s498g0160.2	AT1G20640.2	| Symbols: | Plant regulator RWP-RK family protein | chr1:7155201-7157986 FORWARD LENGTH=844	0
chr1LG6_289005926_289006077	mir169_2	Psat0s498g0160.1	AT1G20640.2	| Symbols: | Plant regulator RWP-RK family protein | chr1:7155201-7157986 FORWARD LENGTH=844	0
chr1LG6_289005926_289006077	mir169_2	Psat7g040560.1	AT1G10940.1	| Symbols: ASK1, SNRK2-4, SNRK2.4, SRK2A | Protein kinase superfamily protein | chr1:3656050-3658170 REVERSE LENGTH=363	0
chr1LG6_289005926_289006077	mir169_2	Psat5g197040.1	No hits found
chr1LG6_289005926_289006077	mir169_2	Psat5g001480.1	AT2G16800.1	| Symbols: | high-affinity nickel-transport family protein | chr2:7285824-7287188 FORWARD LENGTH=372	7e-162
chr1LG6_289005926_289006077	mir169_2	Psat3g077280.1	No hits found
chr1LG6_289005926_289006077	mir169_2	Psat0s748g0080.1	AT1G63430.1	| Symbols: | Leucine-rich repeat protein kinase family protein | chr1:23522896-23526451 FORWARD LENGTH=664	0
chr1LG6_289005926_289006077	mir169_2	Psat6g081000.1	No hits found
chr1LG6_289005926_289006077	mir169_2	Psat5g218200.1	No hits found
chr1LG6_289005926_289006077	mir169_2	Psat0s1135g0240.1	AT1G55520.2	| Symbols: TBP2, ATTBP2 | TATA binding protein 2 | chr1:20726150-20727483 REVERSE LENGTH=200	3e-51
chr1LG6_289005926_289006077	mir169_2	Psat6g224680.1	AT2G01220.2	| Symbols: | Nucleotidylyl transferase superfamily protein | chr2:123301-126213 FORWARD LENGTH=388	0
chr1LG6_289005926_289006077	mir169_2	Psat2g088920.1	AT1G68730.1	| Symbols: | Zim17-type zinc finger protein | chr1:25810321-25811128 REVERSE LENGTH=170	7e-41
chr1LG6_289005926_289006077	mir169_2	Psat7g115960.1	AT4G31940.1	| Symbols: CYP82C4 | cytochrome P450, family 82, subfamily C, polypeptide 4 | chr4:15452040-15453966 FORWARD LENGTH=524	3e-166
chr1LG6_289005926_289006077	mir169_2	Psat0s454g0040.1	AT4G40010.1	| Symbols: SNRK2-7, SNRK2.7, SRK2F | SNF1-related protein kinase 2.7 | chr4:18548704-18551056 REVERSE LENGTH=350	2e-169
chr1LG6_289005926_289006077	mir169_2	Psat5g019560.1	No hits found
chr1LG6_289005926_289006077	mir169_2	Psat5g019200.1	No hits found
chr1LG6_289005926_289006077	mir169_2	Psat5g019400.1	No hits found
chr1LG6_289005926_289006077	mir169_2	Psat0s3959g0160.1	No hits found
chr1LG6_289005926_289006077	mir169_2	Psat7g037880.1	AT5G50760.1	| Symbols: | SAUR-like auxin-responsive protein family | chr5:20644780-20645331 FORWARD LENGTH=183	1e-23
chr1LG6_289005926_289006077	mir169_2	Psat4g222600.1	AT1G18450.1	| Symbols: ATARP4, ARP4 | actin-related protein 4 | chr1:6348199-6351766 FORWARD LENGTH=441	0
chr1LG6_289005926_289006077	mir169_2	Psat4g222600.2	AT1G18450.1	| Symbols: ATARP4, ARP4 | actin-related protein 4 | chr1:6348199-6351766 FORWARD LENGTH=441	0
chr1LG6_289005926_289006077	mir169_2	Psat6g027880.1	AT4G32140.1	| Symbols: | EamA-like transporter family | chr4:15523037-15525195 REVERSE LENGTH=394	0
chr1LG6_289005926_289006077	mir169_2	Psat6g027880.2	AT4G32140.1	| Symbols: | EamA-like transporter family | chr4:15523037-15525195 REVERSE LENGTH=394	0
chr1LG6_289005926_289006077	mir169_2	Psat4g036240.2	AT5G34850.1	| Symbols: ATPAP26, PAP26 | purple acid phosphatase 26 | chr5:13108475-13111217 REVERSE LENGTH=475	0
chr1LG6_289005926_289006077	mir169_2	Psat4g036240.1	AT5G34850.1	| Symbols: ATPAP26, PAP26 | purple acid phosphatase 26 | chr5:13108475-13111217 REVERSE LENGTH=475	0
chr1LG6_289005926_289006077	mir169_2	Psat1g198160.1	AT1G29140.1	| Symbols: | Pollen Ole e 1 allergen and extensin family protein | chr1:10179029-10179811 FORWARD LENGTH=171	9e-56
chr1LG6_289005926_289006077	mir169_2	Psat0s2221g0040.2	AT5G20220.2	| Symbols: | zinc knuckle (CCHC-type) family protein | chr5:6822208-6825771 FORWARD LENGTH=393	1e-162
chr1LG6_289005926_289006077	mir169_2	Psat0s2221g0040.3	AT5G20220.2	| Symbols: | zinc knuckle (CCHC-type) family protein | chr5:6822208-6825771 FORWARD LENGTH=393	3e-118
chr1LG6_289005926_289006077	mir169_2	Psat0s2221g0040.1	AT5G20220.2	| Symbols: | zinc knuckle (CCHC-type) family protein | chr5:6822208-6825771 FORWARD LENGTH=393	2e-77
chr1LG6_289005926_289006077	mir169_2	Psat0s2221g0040.4	AT5G20220.2	| Symbols: | zinc knuckle (CCHC-type) family protein | chr5:6822208-6825771 FORWARD LENGTH=393	2e-77
chr1LG6_289005926_289006077	mir169_2	Psat3g029800.1	AT2G35980.1	| Symbols: YLS9, NHL10, ATNHL10 | Late embryogenesis abundant (LEA) hydroxyproline-rich glycoprotein family |chr2:15110635-15111318 FORWARD LENGTH=227	9e-74
chr1LG6_289005926_289006077	mir169_2	Psat7g189080.1	AT3G16000.1	| Symbols: MFP1 | MAR binding filament-like protein 1 | chr3:5431041-5433613 REVERSE LENGTH=726	1e-139
chr1LG6_289005926_289006077	mir169_2	Psat7g189080.2	AT3G16000.1	| Symbols: MFP1 | MAR binding filament-like protein 1 | chr3:5431041-5433613 REVERSE LENGTH=726	8e-149
chr1LG6_289005926_289006077	mir169_2	Psat0s1289g0080.1	AT2G26530.1	| Symbols: AR781 | Protein of unknown function (DUF1645) | chr2:11283036-11283989 REVERSE LENGTH=317	8e-10
chr1LG6_289005926_289006077	mir169_2	Psat7g196720.1	No hits found
chr1LG6_289005926_289006077	mir169_2	Psat0s1998g0040.1	No hits found
chr1LG6_289005926_289006077	mir169_2	Psat7g218840.1	AT3G12580.1	| Symbols: HSP70, ATHSP70 | heat shock protein 70 | chr3:3991487-3993689 REVERSE LENGTH=650	0
chr1LG6_289005926_289006077	mir169_2	Psat2g069320.1	AT1G22490.1	| Symbols: | basic helix-loop-helix (bHLH) DNA-binding superfamily protein | chr1:7938448-7940489 REVERSE LENGTH=304	7e-84
chr1LG6_289005926_289006077	mir169_2	Psat2g069320.2	AT1G22490.1	| Symbols: | basic helix-loop-helix (bHLH) DNA-binding superfamily protein | chr1:7938448-7940489 REVERSE LENGTH=304	8e-72
chr1LG6_289005926_289006077	mir169_2	Psat2g069320.3	AT1G22490.1	| Symbols: | basic helix-loop-helix (bHLH) DNA-binding superfamily protein | chr1:7938448-7940489 REVERSE LENGTH=304	3e-71
chr1LG6_289005926_289006077	mir169_2	Psat3g034680.1	AT1G66950.1	| Symbols: PDR11, ATPDR11 | pleiotropic drug resistance 11 | chr1:24978239-24984461 FORWARD LENGTH=1454	0
chr1LG6_289005926_289006077	mir169_2	Psat2g079520.1	AT5G08640.2	| Symbols: FLS1 | flavonol synthase 1 | chr5:2804009-2805175 FORWARD LENGTH=336	1e-145
chr1LG6_289005926_289006077	mir169_2	Psat0s2311g0040.1	No hits found
chr1LG6_289005926_289006077	mir169_2	Psat7g034920.2	AT5G23750.2	| Symbols: | Remorin family protein | chr5:8010004-8011453 REVERSE LENGTH=201	1e-47
chr1LG6_289005926_289006077	mir169_2	Psat7g034920.1	AT5G23750.2	| Symbols: | Remorin family protein | chr5:8010004-8011453 REVERSE LENGTH=201	3e-51
chr1LG6_289005926_289006077	mir169_2	Psat3g086960.1	AT3G03710.1	| Symbols: RIF10, PNP | polyribonucleotide nucleotidyltransferase, putative | chr3:919542-924906 FORWARD LENGTH=922	3e-137
chr1LG6_289005926_289006077	mir169_2	Psat2g001080.1	AT4G38350.1	| Symbols: | Patched family protein | chr4:17958324-17966846 REVERSE LENGTH=1273	0
chr1LG6_289005926_289006077	mir169_2	Psat3g126120.1	AT3G23590.1	| Symbols: RFR1, MED33A | REF4-related 1 | chr3:8467638-8473469 FORWARD LENGTH=1309	2e-158
chr1LG6_289005926_289006077	mir169_2	Psat3g122200.1	No hits found
chr1LG6_289005926_289006077	mir169_2	Psat4g200960.1	AT2G42010.1	| Symbols: PLDBETA1, PLDBETA | phospholipase D beta 1 | chr2:17533018-17537990 REVERSE LENGTH=1083	4e-110
chr1LG6_289005926_289006077	mir169_2	Psat1g045440.1	AT2G20050.1	| Symbols: | protein serine/threonine phosphatases;protein kinases;catalytics;cAMP-dependent protein kinase regulators;ATP binding;protein serine/threonine phosphatases| chr2:8649779-8654193 REVERSE LENGTH=1094	0
chr1LG6_289005926_289006077	mir169_2	Psat5g112640.1	AT4G12640.1	| Symbols: | RNA recognition motif (RRM)-containing protein | chr4:7462697-7467630 FORWARD LENGTH=823	0
chr1LG6_289005926_289006077	mir169_2	Psat1g066400.1	AT3G02220.1	| Symbols: | unknown protein; CONTAINS InterPro DOMAIN/s: Protein of unknown function DUF2039 (InterPro:IPR019351);Has 215 Blast hits to 215 proteins in 94 species: Archae- 2; Bacteria - 2; Metazoa - 125; Fungi - 4; Plants - 38;Viruses - 0; Other Eukaryotes - 44 (source: NCBI BLink).| chr3:412210-413536 REVERSE LENGTH=227	1e-89
chr1LG6_289005926_289006077	mir169_2	Psat7g214880.1	AT3G59410.1	| Symbols: GCN2 | protein kinase family protein | chr3:21950575-21959151 FORWARD LENGTH=1241	0
chr1LG6_289005926_289006077	mir169_2	Psat2g154280.1	AT5G66200.1	| Symbols: ARO2 | armadillo repeat only 2 | chr5:26453648-26455603 REVERSE LENGTH=651	0
chr1LG6_289005926_289006077	mir169_2	Psat1g200200.1	AT5G22860.1	| Symbols: | Serine carboxypeptidase S28 family protein | chr5:7639511-7642945 REVERSE LENGTH=502	8e-141
chr1LG6_289005926_289006077	mir169_2	Psat7g138080.1	AT5G23190.1	| Symbols: CYP86B1 | cytochrome P450, family 86, subfamily B, polypeptide 1 | chr5:7803478-7805659 REVERSE LENGTH=559	0
chr1LG6_289005926_289006077	mir169_2	Psat0s3452g0040.1	AT3G18990.1	| Symbols: VRN1, REM39 | AP2/B3-like transcriptional factor family protein | chr3:6549077-6551568 REVERSE LENGTH=341	2e-118
chr1LG6_289005926_289006077	mir169_2	Psat4g063040.1	AT1G61850.2	| Symbols: | phospholipases;galactolipases | chr1:22856317-22862225 FORWARD LENGTH=1309	0
chr1LG6_289005926_289006077	mir169_2	Psat2g001880.1	AT1G61520.3	| Symbols: LHCA3 | photosystem I light harvesting complex gene 3 | chr1:22700152-22701149 FORWARD LENGTH=273	7e-165
chr1LG6_331428158_331428247	mir171_1	Psat3g163480.1	AT4G00150.1	| Symbols: HAM3, ATHAM3, LOM3 | GRAS family transcription factor | chr4:57429-59105 REVERSE LENGTH=558	5e-140
chr1LG6_331428158_331428247	mir171_1	Psat7g236360.1	AT4G00150.1	| Symbols: HAM3, ATHAM3, LOM3 | GRAS family transcription factor | chr4:57429-59105 REVERSE LENGTH=558	2e-125
chr1LG6_331428158_331428247	mir171_1	Psat0s4221g0160.1	No hits found
chr1LG6_331428158_331428247	mir171_1	Psat4g126320.1	No hits found
chr1LG6_331428158_331428247	mir171_1	Psat4g071840.1	No hits found
chr1LG6_331428158_331428247	mir171_1	Psat1g053800.1	AT3G25440.2	| Symbols: | RNA-binding CRS1 / YhbY (CRM) domain protein | chr3:9224294-9225505 FORWARD LENGTH=380	9e-48
chr1LG6_331428158_331428247	mir171_1	Psat5g133360.1	AT4G08250.1	| Symbols: | GRAS family transcription factor | chr4:5196787-5198238 FORWARD LENGTH=483	9e-154
chr1LG6_331428158_331428247	mir171_1	Psat6g117480.1	No hits found
chr1LG6_359297682_359297807	mir397	Psat2g053560.1	AT2G30210.1	| Symbols: LAC3 | laccase 3 | chr2:12887735-12889827 REVERSE LENGTH=570	0
chr1LG6_359297682_359297807	mir397	Psat4g028880.3	AT4G15530.6	| Symbols: PPDK | pyruvate orthophosphate dikinase | chr4:8864828-8870748 REVERSE LENGTH=963	0
chr1LG6_359297682_359297807	mir397	Psat4g028880.2	AT4G15530.4	| Symbols: PPDK | pyruvate orthophosphate dikinase | chr4:8864828-8870727 REVERSE LENGTH=956	0
chr1LG6_359297682_359297807	mir397	Psat4g028880.1	AT4G15530.4	| Symbols: PPDK | pyruvate orthophosphate dikinase | chr4:8864828-8870727 REVERSE LENGTH=956	0
chr1LG6_359297682_359297807	mir397	Psat6g076760.2	AT1G22060.1	| Symbols: | LOCATED IN: vacuole; EXPRESSED IN: 23 plant structures; EXPRESSED DURING: 13 growth stages; BEST Arabidopsis thaliana protein match is: FBD, F-box and Leucine Rich Repeat domains containing protein (TAIR:AT1G22000.1);Has 84739 Blast hits to 38714 proteins in 2257 species: Archae- 1436; Bacteria - 11314; Metazoa - 40747; Fungi - 7706;Plants - 4675; Viruses - 308; Other Eukaryotes - 18…	4e-30
chr1LG6_359297682_359297807	mir397	Psat6g076760.1	AT1G22060.1	| Symbols: | LOCATED IN: vacuole; EXPRESSED IN: 23 plant structures; EXPRESSED DURING: 13 growth stages; BEST Arabidopsis thaliana protein match is: FBD, F-box and Leucine Rich Repeat domains containing protein (TAIR:AT1G22000.1);Has 84739 Blast hits to 38714 proteins in 2257 species: Archae- 1436; Bacteria - 11314; Metazoa - 40747; Fungi - 7706;Plants - 4675; Viruses - 308; Other Eukaryotes - 18…	5e-30
chr1LG6_359297682_359297807	mir397	Psat7g195400.1	AT5G42220.1	| Symbols: | Ubiquitin-like superfamily protein | chr5:16872962-16877455 FORWARD LENGTH=879	2e-41
chr1LG6_359297682_359297807	mir397	Psat7g156440.2	AT2G45010.1	| Symbols: | PLAC8 family protein | chr2:18568045-18569615 FORWARD LENGTH=244	8e-108
chr1LG6_359297682_359297807	mir397	Psat7g156440.1	AT2G45010.1	| Symbols: | PLAC8 family protein | chr2:18568045-18569615 FORWARD LENGTH=244	8e-108
chr1LG6_359297682_359297807	mir397	Psat5g066760.1	AT2G30340.1	| Symbols: LBD13 | LOB domain-containing protein 13 | chr2:12931306-12932540 REVERSE LENGTH=268	9e-29
chr1LG6_359297682_359297807	mir397	Psat3g056400.1	AT4G21150.3	| Symbols: HAP6 | ribophorin II (RPN2) family protein | chr4:11278646-11283599 FORWARD LENGTH=691	0
chr1LG6_359297682_359297807	mir397	Psat6g073400.1	AT5G03420.1	| Symbols: | 5'-AMP-activated protein kinase-related | chr5:845641-848705 FORWARD LENGTH=598	8e-89
chr1LG6_359297682_359297807	mir397	Psat5g299360.1	AT4G31400.1	| Symbols: CTF7 | damaged DNA binding;DNA-directed DNA polymerases | chr4:15237411-15239266 FORWARD LENGTH=345	5e-108
chr1LG6_359297682_359297807	mir397	Psat3g091640.1	AT3G26630.1	| Symbols: | Tetratricopeptide repeat (TPR)-like superfamily protein | chr3:9791572-9792939 REVERSE LENGTH=455	2e-154
chr1LG6_359320303_359320503	mir397	Psat2g158520.1	AT5G03260.1	| Symbols: LAC11 | laccase 11 | chr5:777198-779338 REVERSE LENGTH=557	0
chr1LG6_359320303_359320503	mir397	Psat0s78g0040.1	AT5G03260.1	| Symbols: LAC11 | laccase 11 | chr5:777198-779338 REVERSE LENGTH=557	1e-07
chr1LG6_359320303_359320503	mir397	Psat5g161560.1	AT2G38080.1	| Symbols: IRX12, LAC4, ATLMCO4, LMCO4 | Laccase/Diphenol oxidase family protein | chr2:15934540-15937352 FORWARD LENGTH=558	0
chr1LG6_359320303_359320503	mir397	Psat7g247800.1	AT2G38080.1	| Symbols: IRX12, LAC4, ATLMCO4, LMCO4 | Laccase/Diphenol oxidase family protein | chr2:15934540-15937352 FORWARD LENGTH=558	0
chr1LG6_359320303_359320503	mir397	Psat7g242520.2	AT3G09220.1	| Symbols: LAC7 | laccase 7 | chr3:2827434-2830477 REVERSE LENGTH=567	0
chr1LG6_359320303_359320503	mir397	Psat7g242520.1	AT3G09220.1	| Symbols: LAC7 | laccase 7 | chr3:2827434-2830477 REVERSE LENGTH=567	0
chr1LG6_359320303_359320503	mir397	Psat3g137400.1	AT5G60020.1	| Symbols: LAC17, ATLAC17 | laccase 17 | chr5:24168072-24170223 FORWARD LENGTH=577	0
chr1LG6_359320303_359320503	mir397	Psat7g210080.1	AT2G29130.1	| Symbols: LAC2, ATLAC2 | laccase 2 | chr2:12525189-12527699 REVERSE LENGTH=573	0
chr1LG6_359320303_359320503	mir397	Psat3g140800.1	AT5G60020.1	| Symbols: LAC17, ATLAC17 | laccase 17 | chr5:24168072-24170223 FORWARD LENGTH=577	0
chr1LG6_359320303_359320503	mir397	Psat3g144080.1	AT5G60020.1	| Symbols: LAC17, ATLAC17 | laccase 17 | chr5:24168072-24170223 FORWARD LENGTH=577	0
chr1LG6_359320303_359320503	mir397	Psat2g158520.1	AT5G03260.1	| Symbols: LAC11 | laccase 11 | chr5:777198-779338 REVERSE LENGTH=557	0
chr1LG6_359320303_359320503	mir397	Psat3g144120.3	AT5G60020.1	| Symbols: LAC17, ATLAC17 | laccase 17 | chr5:24168072-24170223 FORWARD LENGTH=577	4e-164
chr1LG6_359320303_359320503	mir397	Psat3g144120.2	AT5G60020.1	| Symbols: LAC17, ATLAC17 | laccase 17 | chr5:24168072-24170223 FORWARD LENGTH=577	0
chr1LG6_359320303_359320503	mir397	Psat3g144120.1	AT5G60020.1	| Symbols: LAC17, ATLAC17 | laccase 17 | chr5:24168072-24170223 FORWARD LENGTH=577	0
chr1LG6_359320303_359320503	mir397	Psat2g158560.1	AT5G03260.1	| Symbols: LAC11 | laccase 11 | chr5:777198-779338 REVERSE LENGTH=557	0
chr1LG6_359320303_359320503	mir397	Psat6g196800.1	AT5G52510.1	| Symbols: SCL8 | SCARECROW-like 8 | chr5:21307196-21309118 FORWARD LENGTH=640	3e-135
chr1LG6_359320303_359320503	mir397	Psat3g137280.1	AT5G60020.1	| Symbols: LAC17, ATLAC17 | laccase 17 | chr5:24168072-24170223 FORWARD LENGTH=577	0
chr1LG6_359320303_359320503	mir397	Psat5g145160.1	AT5G05390.1	| Symbols: LAC12 | laccase 12 | chr5:1594753-1597042 FORWARD LENGTH=565	0
chr1LG6_359320303_359320503	mir397	Psat5g074280.2	AT4G27680.1	| Symbols: | P-loop containing nucleoside triphosphate hydrolases superfamily protein | chr4:13821263-13823083 FORWARD LENGTH=398	0
chr1LG6_359320303_359320503	mir397	Psat1g044040.1	AT4G28950.1	| Symbols: ARAC7, ATROP9, ATRAC7, RAC7, ROP9 | RHO-related protein from plants 9 | chr4:14278289-14279705 FORWARD LENGTH=209	1e-141
chr1LG6_359320303_359320503	mir397	Psat0s3074g0040.3	AT5G01040.1	| Symbols: LAC8 | laccase 8 | chr5:13394-16142 REVERSE LENGTH=584	5e-151
chr1LG6_359320303_359320503	mir397	Psat0s3074g0040.2	AT5G01040.1	| Symbols: LAC8 | laccase 8 | chr5:13394-16142 REVERSE LENGTH=584	0
chr1LG6_359320303_359320503	mir397	Psat0s3074g0040.1	AT5G01040.1	| Symbols: LAC8 | laccase 8 | chr5:13394-16142 REVERSE LENGTH=584	0
chr1LG6_359320303_359320503	mir397	Psat6g017440.2	AT1G59540.1	| Symbols: ZCF125 | P-loop containing nucleoside triphosphate hydrolases superfamily protein | chr1:21874083-21879382 FORWARD LENGTH=823	0
chr1LG6_359320303_359320503	mir397	Psat6g017440.1	AT1G59540.1	| Symbols: ZCF125 | P-loop containing nucleoside triphosphate hydrolases superfamily protein | chr1:21874083-21879382 FORWARD LENGTH=823	0
chr1LG6_359320303_359320503	mir397	Psat3g033360.1	AT1G80950.1	| Symbols: | Phospholipid/glycerol acyltransferase family protein | chr1:30412653-30414935 REVERSE LENGTH=398	6e-179
chr1LG6_359320303_359320503	mir397	Psat3g033360.2	AT1G80950.1	| Symbols: | Phospholipid/glycerol acyltransferase family protein | chr1:30412653-30414935 REVERSE LENGTH=398	0
chr1LG6_359320303_359320503	mir397	Psat5g081560.1	AT1G43850.2	| Symbols: SEU | SEUSS transcriptional co-regulator | chr1:16617872-16621596 FORWARD LENGTH=877	0
chr1LG6_359320303_359320503	mir397	Psat7g193480.1	AT1G70710.1	| Symbols: ATGH9B1, CEL1, GH9B1 | glycosyl hydrolase 9B1 | chr1:26659356-26662962 REVERSE LENGTH=492	0
chr1LG6_359320303_359320503	mir397	Psat2g119640.1	AT2G02990.1	| Symbols: RNS1, ATRNS1 | ribonuclease 1 | chr2:873714-874667 FORWARD LENGTH=230	5e-118
chr1LG6_359320303_359320503	mir397	Psat4g054040.2	AT3G47950.1	| Symbols: AHA4, HA4 | H(+)-ATPase 4 | chr3:17693015-17697801 FORWARD LENGTH=960	0
chr1LG6_359320303_359320503	mir397	Psat4g054040.1	AT3G47950.1	| Symbols: AHA4, HA4 | H(+)-ATPase 4 | chr3:17693015-17697801 FORWARD LENGTH=960	0
chr1LG6_359320303_359320503	mir397	Psat2g042080.1	AT1G75500.2	| Symbols: WAT1 | Walls Are Thin 1 | chr1:28338282-28340091 REVERSE LENGTH=389	6e-92
chr1LG6_359320303_359320503	mir397	Psat0s1632g0120.1	AT1G75500.2	| Symbols: WAT1 | Walls Are Thin 1 | chr1:28338282-28340091 REVERSE LENGTH=389	1e-93
chr1LG6_359320303_359320503	mir397	Psat0s1632g0080.1	AT1G75500.2	| Symbols: WAT1 | Walls Are Thin 1 | chr1:28338282-28340091 REVERSE LENGTH=389	1e-92
chr1LG6_359320303_359320503	mir397	Psat0s5121g0040.1	AT1G75500.2	| Symbols: WAT1 | Walls Are Thin 1 | chr1:28338282-28340091 REVERSE LENGTH=389	0
chr1LG6_359320303_359320503	mir397	Psat6g225880.1	AT5G38830.1	| Symbols: | Cysteinyl-tRNA synthetase, class Ia family protein | chr5:15545764-15548094 REVERSE LENGTH=511	0
chr1LG6_369636652_369636808	mir166	Psat5g297000.1	AT1G52150.1	| Symbols: ATHB-15, ATHB15, CNA, ICU4 | Homeobox-leucine zipper family protein / lipid-binding START domain-containing protein | chr1:19409913-19413961 REVERSE LENGTH=836	0
chr1LG6_369636652_369636808	mir166	Psat6g110720.1	No hits found
chr1LG6_369636652_369636808	mir166	Psat4g221480.1	AT1G52150.1	| Symbols: ATHB-15, ATHB15, CNA, ICU4 | Homeobox-leucine zipper family protein / lipid-binding START domain-containing protein | chr1:19409913-19413961 REVERSE LENGTH=836	0
chr1LG6_369636652_369636808	mir166	Psat4g221480.2	AT1G52150.3	| Symbols: ATHB-15, ATHB15, CNA, ICU4 | Homeobox-leucine zipper family protein / lipid-binding START domain-containing protein | chr1:19410118-19413961 REVERSE LENGTH=794	0
chr1LG6_369636652_369636808	mir166	Psat7g081800.1	AT1G30100.1	| Symbols: NCED5, ATNCED5 | nine-cis-epoxycarotenoid dioxygenase 5 | chr1:10571383-10573152 FORWARD LENGTH=589	0
chr2LG1_21550015_21550159	mir398	Psat7g183320.1	AT3G21640.1	| Symbols: TWD1, UCU2, FKBP42, ATFKBP42 | FKBP-type peptidyl-prolyl cis-trans isomerase family protein | chr3:7619025-7621097 REVERSE LENGTH=365	0
chr2LG1_51922181_51922454	mir393	Psat6g167560.1	AT3G62980.1	| Symbols: TIR1 | F-box/RNI-like superfamily protein | chr3:23273479-23276181 REVERSE LENGTH=594	0
chr2LG1_51922181_51922454	mir393	Psat3g024480.1	AT3G62980.1	| Symbols: TIR1 | F-box/RNI-like superfamily protein | chr3:23273479-23276181 REVERSE LENGTH=594	0
chr2LG1_51922181_51922454	mir393	Psat3g024480.2	AT3G62980.1	| Symbols: TIR1 | F-box/RNI-like superfamily protein | chr3:23273479-23276181 REVERSE LENGTH=594	0
chr2LG1_51922181_51922454	mir393	Psat3g094360.1	AT1G12820.1	| Symbols: AFB3 | auxin signaling F-box 3 | chr1:4368879-4370780 REVERSE LENGTH=577	0
chr2LG1_51922181_51922454	mir393	Psat2g023600.1	AT1G16740.1	| Symbols: | Ribosomal protein L20 | chr1:5727773-5728950 FORWARD LENGTH=126	7e-73
chr2LG1_51922181_51922454	mir393	Psat2g023600.2	AT1G16740.1	| Symbols: | Ribosomal protein L20 | chr1:5727773-5728950 FORWARD LENGTH=126	7e-73
chr2LG1_51922181_51922454	mir393	Psat4g204240.1	AT5G18740.1	| Symbols: | Domain of unknown function (DUF3444) | chr5:6250060-6251352 FORWARD LENGTH=430	6e-62
chr2LG1_67576879_67576994	mir172	Psat5g277120.2	AT2G28550.1	| Symbols: RAP2.7, TOE1 | related to AP2.7 | chr2:12226168-12228251 REVERSE LENGTH=449	2e-110
chr2LG1_67576879_67576994	mir172	Psat5g277120.1	AT2G28550.3	| Symbols: RAP2.7 | related to AP2.7 | chr2:12226168-12228251 REVERSE LENGTH=464	1e-121
chr2LG1_67576879_67576994	mir172	Psat2g168760.1	AT4G36920.2	| Symbols: AP2 | Integrase-type DNA-binding superfamily protein | chr4:17400998-17403140 FORWARD LENGTH=432	3e-07
chr2LG1_67576879_67576994	mir172	Psat3g046960.1	AT2G28550.3	| Symbols: RAP2.7 | related to AP2.7 | chr2:12226168-12228251 REVERSE LENGTH=464	5e-114
chr2LG1_67576879_67576994	mir172	Psat2g168720.2	AT4G36920.2	| Symbols: AP2 | Integrase-type DNA-binding superfamily protein | chr4:17400998-17403140 FORWARD LENGTH=432	2e-132
chr2LG1_67576879_67576994	mir172	Psat2g168720.1	AT4G36920.2	| Symbols: AP2 | Integrase-type DNA-binding superfamily protein | chr4:17400998-17403140 FORWARD LENGTH=432	2e-132
chr2LG1_67576879_67576994	mir172	Psat4g085680.1	AT4G36920.2	| Symbols: AP2 | Integrase-type DNA-binding superfamily protein | chr4:17400998-17403140 FORWARD LENGTH=432	2e-126
chr2LG1_67576879_67576994	mir172	Psat7g221800.1	AT2G28550.3	| Symbols: RAP2.7 | related to AP2.7 | chr2:12226168-12228251 REVERSE LENGTH=464	6e-126
chr2LG1_67576879_67576994	mir172	Psat7g187800.1	AT2G27460.1	| Symbols: | sec23/sec24 transport family protein | chr2:11740670-11744867 FORWARD LENGTH=745	0
chr2LG1_67576879_67576994	mir172	Psat6g161880.1	AT1G02610.1	| Symbols: | RING/FYVE/PHD zinc finger superfamily protein | chr1:553181-555854 REVERSE LENGTH=221	8e-63
chr2LG1_67576879_67576994	mir172	Psat3g006920.1	AT1G09770.1	| Symbols: ATCDC5, CDC5, ATMYBCDC5 | cell division cycle 5 | chr1:3162002-3165122 FORWARD LENGTH=844	0
chr2LG1_67576879_67576994	mir172	Psat3g030240.6	AT3G11620.4	| Symbols: | alpha/beta-Hydrolases superfamily protein | chr3:3670030-3671734 REVERSE LENGTH=239	3e-94
chr2LG1_67576879_67576994	mir172	Psat3g030240.5	AT3G11620.4	| Symbols: | alpha/beta-Hydrolases superfamily protein | chr3:3670030-3671734 REVERSE LENGTH=239	2e-106
chr2LG1_67576879_67576994	mir172	Psat3g030240.7	AT3G11620.1	| Symbols: | alpha/beta-Hydrolases superfamily protein | chr3:3669551-3671734 REVERSE LENGTH=312	4e-127
chr2LG1_67576879_67576994	mir172	Psat3g030240.4	AT3G11620.1	| Symbols: | alpha/beta-Hydrolases superfamily protein | chr3:3669551-3671734 REVERSE LENGTH=312	4e-153
chr2LG1_67576879_67576994	mir172	Psat3g030240.1	AT3G11620.1	| Symbols: | alpha/beta-Hydrolases superfamily protein | chr3:3669551-3671734 REVERSE LENGTH=312	4e-153
chr2LG1_67576879_67576994	mir172	Psat3g030240.3	AT3G11620.1	| Symbols: | alpha/beta-Hydrolases superfamily protein | chr3:3669551-3671734 REVERSE LENGTH=312	4e-153
chr2LG1_67576879_67576994	mir172	Psat3g030240.2	AT3G11620.1	| Symbols: | alpha/beta-Hydrolases superfamily protein | chr3:3669551-3671734 REVERSE LENGTH=312	4e-153
chr2LG1_67576879_67576994	mir172	Psat7g005800.1	AT1G17980.1	| Symbols: PAPS1 | poly(A) polymerase 1 | chr1:6187742-6191418 REVERSE LENGTH=713	0
chr2LG1_67576879_67576994	mir172	Psat6g151640.1	AT3G05630.1	| Symbols: PLDP2, PDLZ2, PLDZETA2 | phospholipase D P2 | chr3:1635321-1640105 FORWARD LENGTH=1046	0
chr2LG1_67576884_67576987	mir172	Psat5g277120.2	AT2G28550.1	| Symbols: RAP2.7, TOE1 | related to AP2.7 | chr2:12226168-12228251 REVERSE LENGTH=449	2e-110
chr2LG1_67576884_67576987	mir172	Psat5g277120.1	AT2G28550.3	| Symbols: RAP2.7 | related to AP2.7 | chr2:12226168-12228251 REVERSE LENGTH=464	1e-121
chr2LG1_67576884_67576987	mir172	Psat2g168760.1	AT4G36920.2	| Symbols: AP2 | Integrase-type DNA-binding superfamily protein | chr4:17400998-17403140 FORWARD LENGTH=432	3e-07
chr2LG1_67576884_67576987	mir172	Psat3g046960.1	AT2G28550.3	| Symbols: RAP2.7 | related to AP2.7 | chr2:12226168-12228251 REVERSE LENGTH=464	5e-114
chr2LG1_67576884_67576987	mir172	Psat2g168720.2	AT4G36920.2	| Symbols: AP2 | Integrase-type DNA-binding superfamily protein | chr4:17400998-17403140 FORWARD LENGTH=432	2e-132
chr2LG1_67576884_67576987	mir172	Psat2g168720.1	AT4G36920.2	| Symbols: AP2 | Integrase-type DNA-binding superfamily protein | chr4:17400998-17403140 FORWARD LENGTH=432	2e-132
chr2LG1_67576884_67576987	mir172	Psat4g085680.1	AT4G36920.2	| Symbols: AP2 | Integrase-type DNA-binding superfamily protein | chr4:17400998-17403140 FORWARD LENGTH=432	2e-126
chr2LG1_67576884_67576987	mir172	Psat7g221800.1	AT2G28550.3	| Symbols: RAP2.7 | related to AP2.7 | chr2:12226168-12228251 REVERSE LENGTH=464	6e-126
chr2LG1_67576884_67576987	mir172	Psat7g187800.1	AT2G27460.1	| Symbols: | sec23/sec24 transport family protein | chr2:11740670-11744867 FORWARD LENGTH=745	0
chr2LG1_67576884_67576987	mir172	Psat6g161880.1	AT1G02610.1	| Symbols: | RING/FYVE/PHD zinc finger superfamily protein | chr1:553181-555854 REVERSE LENGTH=221	8e-63
chr2LG1_67576884_67576987	mir172	Psat3g006920.1	AT1G09770.1	| Symbols: ATCDC5, CDC5, ATMYBCDC5 | cell division cycle 5 | chr1:3162002-3165122 FORWARD LENGTH=844	0
chr2LG1_67576884_67576987	mir172	Psat3g030240.6	AT3G11620.4	| Symbols: | alpha/beta-Hydrolases superfamily protein | chr3:3670030-3671734 REVERSE LENGTH=239	3e-94
chr2LG1_67576884_67576987	mir172	Psat3g030240.5	AT3G11620.4	| Symbols: | alpha/beta-Hydrolases superfamily protein | chr3:3670030-3671734 REVERSE LENGTH=239	2e-106
chr2LG1_67576884_67576987	mir172	Psat3g030240.7	AT3G11620.1	| Symbols: | alpha/beta-Hydrolases superfamily protein | chr3:3669551-3671734 REVERSE LENGTH=312	4e-127
chr2LG1_67576884_67576987	mir172	Psat3g030240.4	AT3G11620.1	| Symbols: | alpha/beta-Hydrolases superfamily protein | chr3:3669551-3671734 REVERSE LENGTH=312	4e-153
chr2LG1_67576884_67576987	mir172	Psat3g030240.1	AT3G11620.1	| Symbols: | alpha/beta-Hydrolases superfamily protein | chr3:3669551-3671734 REVERSE LENGTH=312	4e-153
chr2LG1_67576884_67576987	mir172	Psat3g030240.3	AT3G11620.1	| Symbols: | alpha/beta-Hydrolases superfamily protein | chr3:3669551-3671734 REVERSE LENGTH=312	4e-153
chr2LG1_67576884_67576987	mir172	Psat3g030240.2	AT3G11620.1	| Symbols: | alpha/beta-Hydrolases superfamily protein | chr3:3669551-3671734 REVERSE LENGTH=312	4e-153
chr2LG1_67576884_67576987	mir172	Psat7g005800.1	AT1G17980.1	| Symbols: PAPS1 | poly(A) polymerase 1 | chr1:6187742-6191418 REVERSE LENGTH=713	0
chr2LG1_67576884_67576987	mir172	Psat6g151640.1	AT3G05630.1	| Symbols: PLDP2, PDLZ2, PLDZETA2 | phospholipase D P2 | chr3:1635321-1640105 FORWARD LENGTH=1046	0
chr2LG1_86501317_86501577	mir159	Psat1g188440.1	AT4G18390.2	| Symbols: TCP2 | TEOSINTE BRANCHED 1, cycloidea and PCF transcription factor 2 | chr4:10163212-10164309 REVERSE LENGTH=365	4e-46
chr2LG1_86501317_86501577	mir159	Psat0s1198g0040.2	AT4G18390.2	| Symbols: TCP2 | TEOSINTE BRANCHED 1, cycloidea and PCF transcription factor 2 | chr4:10163212-10164309 REVERSE LENGTH=365	1e-71
chr2LG1_86501317_86501577	mir159	Psat0s1198g0040.1	AT4G18390.2	| Symbols: TCP2 | TEOSINTE BRANCHED 1, cycloidea and PCF transcription factor 2 | chr4:10163212-10164309 REVERSE LENGTH=365	1e-71
chr2LG1_86501317_86501577	mir159	Psat0s1198g0040.3	AT4G18390.2	| Symbols: TCP2 | TEOSINTE BRANCHED 1, cycloidea and PCF transcription factor 2 | chr4:10163212-10164309 REVERSE LENGTH=365	1e-71
chr2LG1_86501317_86501577	mir159	Psat1g200600.1	No hits found
chr2LG1_86501317_86501577	mir159	Psat5g274920.1	AT3G15030.3	| Symbols: TCP4 | TCP family transcription factor 4 | chr3:5062308-5063570 FORWARD LENGTH=420	2e-49
chr2LG1_86501317_86501577	mir159	Psat5g240240.1	AT3G15030.3	| Symbols: TCP4 | TCP family transcription factor 4 | chr3:5062308-5063570 FORWARD LENGTH=420	3e-71
chr2LG1_86501317_86501577	mir159	Psat4g170920.1	AT1G53230.1	| Symbols: TCP3 | TEOSINTE BRANCHED 1, cycloidea and PCF transcription factor 3 | chr1:19850260-19851435 REVERSE LENGTH=391	2e-97
chr2LG1_86501317_86501577	mir159	Psat5g225360.3	AT5G06100.1	| Symbols: MYB33, ATMYB33 | myb domain protein 33 | chr5:1838555-1839997 FORWARD LENGTH=451	2e-93
chr2LG1_86501317_86501577	mir159	Psat4g188880.1	AT3G11440.1	| Symbols: ATMYB65, MYB65 | myb domain protein 65 | chr3:3603056-3604929 FORWARD LENGTH=553	2e-101
chr2LG1_86501317_86501577	mir159	Psat5g225360.1	AT3G11440.1	| Symbols: ATMYB65, MYB65 | myb domain protein 65 | chr3:3603056-3604929 FORWARD LENGTH=553	3e-101
chr2LG1_86501317_86501577	mir159	Psat5g225360.2	AT3G11440.1	| Symbols: ATMYB65, MYB65 | myb domain protein 65 | chr3:3603056-3604929 FORWARD LENGTH=553	3e-101
chr2LG1_86501317_86501577	mir159	Psat4g215160.1	AT3G61850.4	| Symbols: DAG1 | Dof-type zinc finger DNA-binding family protein | chr3:22895495-22897150 FORWARD LENGTH=324	4e-28
chr2LG1_104655201_104655382	mir159	Psat5g225360.3	AT5G06100.1	| Symbols: MYB33, ATMYB33 | myb domain protein 33 | chr5:1838555-1839997 FORWARD LENGTH=451	2e-93
chr2LG1_104655201_104655382	mir159	Psat4g188880.1	AT3G11440.1	| Symbols: ATMYB65, MYB65 | myb domain protein 65 | chr3:3603056-3604929 FORWARD LENGTH=553	2e-101
chr2LG1_104655201_104655382	mir159	Psat5g225360.1	AT3G11440.1	| Symbols: ATMYB65, MYB65 | myb domain protein 65 | chr3:3603056-3604929 FORWARD LENGTH=553	3e-101
chr2LG1_104655201_104655382	mir159	Psat5g225360.2	AT3G11440.1	| Symbols: ATMYB65, MYB65 | myb domain protein 65 | chr3:3603056-3604929 FORWARD LENGTH=553	3e-101
chr2LG1_104655201_104655382	mir159	Psat1g200600.1	No hits found
chr2LG1_334925023_334925164	mir398	Psat7g183320.1	AT3G21640.1	| Symbols: TWD1, UCU2, FKBP42, ATFKBP42 | FKBP-type peptidyl-prolyl cis-trans isomerase family protein | chr3:7619025-7621097 REVERSE LENGTH=365	0
chr2LG1_372314340_372314473	mir168	Psat1g122920.1	AT1G48410.1	| Symbols: AGO1 | Stabilizer of iron transporter SufD / Polynucleotidyl transferase | chr1:17886285-17891892 REVERSE LENGTH=1048	0
chr2LG1_372314340_372314473	mir168	Psat4g136720.1	AT4G25200.1	| Symbols: ATHSP23.6-MITO, HSP23.6-MITO | mitochondrion-localized small heat shock protein 23.6 | chr4:12917089-12917858 FORWARD LENGTH=210	9e-70
chr2LG1_372314340_372314473	mir168	Psat5g089880.1	AT5G65030.1	| Symbols: | unknown protein; BEST Arabidopsis thaliana protein match is: unknown protein (TAIR:AT5G10210.1);Has 1807 Blast hits to 1807 proteins in 277 species: Archae- 0; Bacteria - 0; Metazoa - 736; Fungi - 347; Plants - 385;Viruses - 0; Other Eukaryotes - 339 (source: NCBI BLink).| chr5:25975697-25976305 REVERSE LENGTH=202	2e-25
chr2LG1_372314340_372314473	mir168	Psat5g089840.1	AT5G10210.1	| Symbols: | CONTAINS InterPro DOMAIN/s: C2 calcium-dependent membrane targeting (InterPro:IPR000008); BEST Arabidopsis thaliana protein match is: unknown protein (TAIR:AT5G65030.1);Has 1807 Blast hits to 1807 proteins in 277 species:Archae - 0; Bacteria - 0; Metazoa - 736; Fungi - 347;Plants - 385; Viruses - 0; Other Eukaryotes - 339 (source:NCBI BLink). | chr5:3206236-3206829 FORWARD LENGTH=197	1e-24
chr2LG1_372314340_372314473	mir168	Psat5g089720.1	AT5G65030.1	| Symbols: | unknown protein; BEST Arabidopsis thaliana protein match is: unknown protein (TAIR:AT5G10210.1);Has 1807 Blast hits to 1807 proteins in 277 species: Archae- 0; Bacteria - 0; Metazoa - 736; Fungi - 347; Plants - 385;Viruses - 0; Other Eukaryotes - 339 (source: NCBI BLink).| chr5:25975697-25976305 REVERSE LENGTH=202	7e-24
chr2LG1_381836242_381836355	mir171_1	Psat3g163480.1	AT4G00150.1	| Symbols: HAM3, ATHAM3, LOM3 | GRAS family transcription factor | chr4:57429-59105 REVERSE LENGTH=558	5e-140
chr2LG1_381836242_381836355	mir171_1	Psat7g236360.1	AT4G00150.1	| Symbols: HAM3, ATHAM3, LOM3 | GRAS family transcription factor | chr4:57429-59105 REVERSE LENGTH=558	2e-125
chr2LG1_381836242_381836355	mir171_1	Psat6g052800.1	AT1G10390.2	| Symbols: | Nucleoporin autopeptidase | chr1:3407265-3412045 REVERSE LENGTH=1041	0
chr2LG1_381836242_381836355	mir171_1	Psat6g052800.2	AT1G10390.2	| Symbols: | Nucleoporin autopeptidase | chr1:3407265-3412045 REVERSE LENGTH=1041	0
chr2LG1_381836242_381836355	mir171_1	Psat4g091760.1	AT4G36710.1	| Symbols: | GRAS family transcription factor | chr4:17306060-17307520 FORWARD LENGTH=486	2e-165
chr2LG1_381836242_381836355	mir171_1	Psat0s4221g0160.1	No hits found
chr2LG1_381836242_381836355	mir171_1	Psat4g126320.1	No hits found
chr2LG1_381836242_381836355	mir171_1	Psat4g071840.1	No hits found
chr2LG1_422742428_422742603	mir159	Psat1g188440.1	AT4G18390.2	| Symbols: TCP2 | TEOSINTE BRANCHED 1, cycloidea and PCF transcription factor 2 | chr4:10163212-10164309 REVERSE LENGTH=365	4e-46
chr2LG1_422742428_422742603	mir159	Psat0s1198g0040.2	AT4G18390.2	| Symbols: TCP2 | TEOSINTE BRANCHED 1, cycloidea and PCF transcription factor 2 | chr4:10163212-10164309 REVERSE LENGTH=365	1e-71
chr2LG1_422742428_422742603	mir159	Psat0s1198g0040.1	AT4G18390.2	| Symbols: TCP2 | TEOSINTE BRANCHED 1, cycloidea and PCF transcription factor 2 | chr4:10163212-10164309 REVERSE LENGTH=365	1e-71
chr2LG1_422742428_422742603	mir159	Psat0s1198g0040.3	AT4G18390.2	| Symbols: TCP2 | TEOSINTE BRANCHED 1, cycloidea and PCF transcription factor 2 | chr4:10163212-10164309 REVERSE LENGTH=365	1e-71
chr2LG1_422742428_422742603	mir159	Psat1g200600.1	No hits found
chr2LG1_422742428_422742603	mir159	Psat5g274920.1	AT3G15030.3	| Symbols: TCP4 | TCP family transcription factor 4 | chr3:5062308-5063570 FORWARD LENGTH=420	2e-49
chr2LG1_422742428_422742603	mir159	Psat5g240240.1	AT3G15030.3	| Symbols: TCP4 | TCP family transcription factor 4 | chr3:5062308-5063570 FORWARD LENGTH=420	3e-71
chr2LG1_422742428_422742603	mir159	Psat4g170920.1	AT1G53230.1	| Symbols: TCP3 | TEOSINTE BRANCHED 1, cycloidea and PCF transcription factor 3 | chr1:19850260-19851435 REVERSE LENGTH=391	2e-97
chr2LG1_422742428_422742603	mir159	Psat5g225360.3	AT5G06100.1	| Symbols: MYB33, ATMYB33 | myb domain protein 33 | chr5:1838555-1839997 FORWARD LENGTH=451	2e-93
chr2LG1_422742428_422742603	mir159	Psat4g188880.1	AT3G11440.1	| Symbols: ATMYB65, MYB65 | myb domain protein 65 | chr3:3603056-3604929 FORWARD LENGTH=553	2e-101
chr2LG1_422742428_422742603	mir159	Psat5g225360.1	AT3G11440.1	| Symbols: ATMYB65, MYB65 | myb domain protein 65 | chr3:3603056-3604929 FORWARD LENGTH=553	3e-101
chr2LG1_422742428_422742603	mir159	Psat5g225360.2	AT3G11440.1	| Symbols: ATMYB65, MYB65 | myb domain protein 65 | chr3:3603056-3604929 FORWARD LENGTH=553	3e-101
chr2LG1_422742428_422742603	mir159	Psat4g215160.1	AT3G61850.4	| Symbols: DAG1 | Dof-type zinc finger DNA-binding family protein | chr3:22895495-22897150 FORWARD LENGTH=324	4e-28
chr2LG1_426429639_426429800	mir166	Psat4g221480.1	AT1G52150.1	| Symbols: ATHB-15, ATHB15, CNA, ICU4 | Homeobox-leucine zipper family protein / lipid-binding START domain-containing protein | chr1:19409913-19413961 REVERSE LENGTH=836	0
chr2LG1_426429639_426429800	mir166	Psat5g297000.1	AT1G52150.1	| Symbols: ATHB-15, ATHB15, CNA, ICU4 | Homeobox-leucine zipper family protein / lipid-binding START domain-containing protein | chr1:19409913-19413961 REVERSE LENGTH=836	0
chr2LG1_426429639_426429800	mir166	Psat4g221480.2	AT1G52150.3	| Symbols: ATHB-15, ATHB15, CNA, ICU4 | Homeobox-leucine zipper family protein / lipid-binding START domain-containing protein | chr1:19410118-19413961 REVERSE LENGTH=794	0
chr2LG1_426429639_426429800	mir166	Psat1g167760.1	AT2G34710.1	| Symbols: PHB, ATHB14, ATHB-14, PHB-1D | Homeobox-leucine zipper family protein / lipid-binding START domain-containing protein | chr2:14639548-14643993 REVERSE LENGTH=852	0
chr2LG1_426429639_426429800	mir166	Psat7g225360.1	AT5G60690.1	| Symbols: REV, IFL, IFL1 | Homeobox-leucine zipper family protein / lipid-binding START domain-containing protein| chr5:24397734-24401933 FORWARD LENGTH=842	0
chr2LG1_426429639_426429800	mir166	Psat1g167760.2	AT2G34710.1	| Symbols: PHB, ATHB14, ATHB-14, PHB-1D | Homeobox-leucine zipper family protein / lipid-binding START domain-containing protein | chr2:14639548-14643993 REVERSE LENGTH=852	0
chr2LG1_426429639_426429800	mir166	Psat5g279960.1	AT5G60690.1	| Symbols: REV, IFL, IFL1 | Homeobox-leucine zipper family protein / lipid-binding START domain-containing protein| chr5:24397734-24401933 FORWARD LENGTH=842	0
chr2LG1_426429639_426429800	mir166	Psat5g020800.1	AT4G32880.1	| Symbols: ATHB-8, ATHB8, HB-8 | homeobox gene 8 | chr4:15863587-15867822 REVERSE LENGTH=833	0
chr3LG5_28279618_28279726		Psat1g050000.1	AT1G64070.1	| Symbols: RLM1 | Disease resistance protein (TIR-NBS-LRR class) family | chr1:23779949-23783449 FORWARD LENGTH=997	6e-38
chr3LG5_28279618_28279726		Psat1g216720.1	AT1G78160.1	| Symbols: APUM7, PUM7 | pumilio 7 | chr1:29407900-29410184 FORWARD LENGTH=650	3e-131
chr3LG5_28279618_28279726		Psat5g289760.1	AT1G06070.1	| Symbols: | Basic-leucine zipper (bZIP) transcription factor family protein | chr1:1835201-1837116 REVERSE LENGTH=423	5e-164
chr3LG5_28279618_28279726		Psat5g289760.2	AT1G06070.1	| Symbols: | Basic-leucine zipper (bZIP) transcription factor family protein | chr1:1835201-1837116 REVERSE LENGTH=423	5e-164
chr3LG5_28279618_28279726		Psat0s2046g0080.1	AT3G26730.1	| Symbols: | RING/U-box superfamily protein | chr3:9823770-9827270 FORWARD LENGTH=772	2e-32
chr3LG5_28279618_28279726		Psat2g087400.1	AT3G26730.1	| Symbols: | RING/U-box superfamily protein | chr3:9823770-9827270 FORWARD LENGTH=772	2e-56
chr3LG5_28279618_28279726		Psat3g093480.1	AT3G26730.1	| Symbols: | RING/U-box superfamily protein | chr3:9823770-9827270 FORWARD LENGTH=772	8e-147
chr3LG5_130067641_130067899	mir167_1	Psat5g229040.1	AT1G53000.1	| Symbols: KDSB | Nucleotide-diphospho-sugar transferases superfamily protein | chr1:19745330-19747133 REVERSE LENGTH=290	1e-174
chr3LG5_130067641_130067899	mir167_1	Psat2g167360.2	AT5G67030.1	| Symbols: ABA1, LOS6, NPQ2, ATABA1, ZEP, IBS3, ATZEP | zeaxanthin epoxidase (ZEP) (ABA1) | chr5:26753745-26757090 REVERSE LENGTH=667	0
chr3LG5_130067641_130067899	mir167_1	Psat2g167360.3	AT5G67030.1	| Symbols: ABA1, LOS6, NPQ2, ATABA1, ZEP, IBS3, ATZEP | zeaxanthin epoxidase (ZEP) (ABA1) | chr5:26753745-26757090 REVERSE LENGTH=667	0
chr3LG5_130067641_130067899	mir167_1	Psat2g167360.1	AT5G67030.1	| Symbols: ABA1, LOS6, NPQ2, ATABA1, ZEP, IBS3, ATZEP | zeaxanthin epoxidase (ZEP) (ABA1) | chr5:26753745-26757090 REVERSE LENGTH=667	0
chr3LG5_130067641_130067899	mir167_1	Psat3g108400.1	AT4G00450.1	| Symbols: CRP, CCT | RNA polymerase II transcription mediators | chr4:202425-210666 FORWARD LENGTH=2253	0
chr3LG5_130067641_130067899	mir167_1	Psat3g108400.3	AT4G00450.1	| Symbols: CRP, CCT | RNA polymerase II transcription mediators | chr4:202425-210666 FORWARD LENGTH=2253	0
chr3LG5_130067641_130067899	mir167_1	Psat3g108400.2	AT4G00450.1	| Symbols: CRP, CCT | RNA polymerase II transcription mediators | chr4:202425-210666 FORWARD LENGTH=2253	0
chr3LG5_130067641_130067899	mir167_1	Psat0s3082g0040.1	AT3G14350.1	| Symbols: SRF7 | STRUBBELIG-receptor family 7 | chr3:4783115-4786999 REVERSE LENGTH=717	0
chr3LG5_130067641_130067899	mir167_1	Psat1g004040.1	AT3G14350.2	| Symbols: SRF7 | STRUBBELIG-receptor family 7 | chr3:4783115-4786397 REVERSE LENGTH=680	8e-106
chr3LG5_130067641_130067899	mir167_1	Psat6g243600.1	AT2G31660.1	| Symbols: SAD2, URM9 | ARM repeat superfamily protein | chr2:13464519-13471353 FORWARD LENGTH=1040	0
chr3LG5_130067641_130067899	mir167_1	Psat6g029600.3	AT2G25530.1	| Symbols: | AFG1-like ATPase family protein | chr2:10863059-10866597 FORWARD LENGTH=655	0
chr3LG5_130067641_130067899	mir167_1	Psat6g029600.1	AT2G25530.1	| Symbols: | AFG1-like ATPase family protein | chr2:10863059-10866597 FORWARD LENGTH=655	0
chr3LG5_130067641_130067899	mir167_1	Psat6g029600.2	AT2G25530.1	| Symbols: | AFG1-like ATPase family protein | chr2:10863059-10866597 FORWARD LENGTH=655	0
chr3LG5_130067641_130067899	mir167_1	Psat1g168640.1	AT3G54950.1	| Symbols: PLP7, PLA IIIA | patatin-like protein 6 | chr3:20359076-20360774 REVERSE LENGTH=488	1e-137
chr3LG5_130067641_130067899	mir167_1	Psat1g192000.1	AT1G30330.1	| Symbols: ARF6 | auxin response factor 6 | chr1:10686125-10690036 REVERSE LENGTH=933	0
chr3LG5_130067641_130067899	mir167_1	Psat2g042360.1	AT5G37020.1	| Symbols: ARF8, ATARF8 | auxin response factor 8 | chr5:14630151-14634106 FORWARD LENGTH=811	0
chr3LG5_130067641_130067899	mir167_1	Psat2g042360.2	AT5G37020.2	| Symbols: ARF8 | auxin response factor 8 | chr5:14630151-14633916 FORWARD LENGTH=773	0
chr3LG5_130067641_130067899	mir167_1	Psat7g078800.1	AT1G30330.2	| Symbols: ARF6 | auxin response factor 6 | chr1:10686125-10690036 REVERSE LENGTH=935	0
chr3LG5_130067641_130067899	mir167_1	Psat5g144000.1	AT5G37020.1	| Symbols: ARF8, ATARF8 | auxin response factor 8 | chr5:14630151-14634106 FORWARD LENGTH=811	0
chr3LG5_130067641_130067899	mir167_1	Psat7g142800.1	AT2G05990.2	| Symbols: MOD1, ENR1 | NAD(P)-binding Rossmann-fold superfamily protein | chr2:2322876-2324867 FORWARD LENGTH=390	3e-67
chr3LG5_130067641_130067899	mir167_1	Psat4g072520.1	AT4G16650.1	| Symbols: | O-fucosyltransferase family protein | chr4:9372727-9375910 FORWARD LENGTH=549	0
chr3LG5_130067641_130067899	mir167_1	Psat2g059600.1	AT2G38080.1	| Symbols: IRX12, LAC4, ATLMCO4, LMCO4 | Laccase/Diphenol oxidase family protein | chr2:15934540-15937352 FORWARD LENGTH=558	0
chr3LG5_130067641_130067899	mir167_1	Psat7g227760.1	AT1G50510.1	| Symbols: | indigoidine synthase A family protein | chr1:18716578-18719060 FORWARD LENGTH=330	6e-159
chr3LG5_130067641_130067899	mir167_1	Psat7g227760.2	AT1G50510.1	| Symbols: | indigoidine synthase A family protein | chr1:18716578-18719060 FORWARD LENGTH=330	6e-149
chr3LG5_130067641_130067899	mir167_1	Psat7g227760.3	AT1G50510.1	| Symbols: | indigoidine synthase A family protein | chr1:18716578-18719060 FORWARD LENGTH=330	8e-133
chr3LG5_130067641_130067899	mir167_1	Psat7g112840.1	AT4G04920.2	| Symbols: SFR6 | sensitive to freezing 6 | chr4:2497931-2504996 FORWARD LENGTH=1267	0
chr3LG5_130067641_130067899	mir167_1	Psat7g261320.1	AT4G31540.1	| Symbols: ATEXO70G1, EXO70G1 | exocyst subunit exo70 family protein G1 | chr4:15284739-15286802 REVERSE LENGTH=687	0
chr3LG5_130067641_130067899	mir167_1	Psat1g145480.1	AT4G29960.1	| Symbols: | unknown protein; FUNCTIONS IN: molecular_function unknown; INVOLVED IN: biological_process unknown;LOCATED IN: plasma membrane; EXPRESSED IN: 23 plant structures;EXPRESSED DURING: 15 growth stages; Has 30201 Blast hits to 17322 proteins in 780 species: Archae - 12; Bacteria- 1396; Metazoa - 17338; Fungi - 3422; Plants - 5037; Viruses- 0; Other Eukaryotes - 2996 (source: NCBI BLink). …	4e-96
chr3LG5_130067641_130067899	mir167_1	Psat5g027120.1	AT1G15520.1	| Symbols: PDR12, ATPDR12, ABCG40, ATABCG40 | pleiotropic drug resistance 12 | chr1:5331993-5338175 REVERSE LENGTH=1423	0
chr3LG5_130067641_130067899	mir167_1	Psat3g089480.2	AT5G18230.1	| Symbols: | transcription regulator NOT2/NOT3/NOT5 family protein | chr5:6021610-6027031 REVERSE LENGTH=843	0
chr3LG5_130067641_130067899	mir167_1	Psat3g089480.1	AT5G18230.1	| Symbols: | transcription regulator NOT2/NOT3/NOT5 family protein | chr5:6021610-6027031 REVERSE LENGTH=843	0
chr3LG5_181768832_181768981	mir166	Psat5g297000.1	AT1G52150.1	| Symbols: ATHB-15, ATHB15, CNA, ICU4 | Homeobox-leucine zipper family protein / lipid-binding START domain-containing protein | chr1:19409913-19413961 REVERSE LENGTH=836	0
chr3LG5_181768832_181768981	mir166	Psat6g110720.1	No hits found
chr3LG5_181768832_181768981	mir166	Psat4g221480.1	AT1G52150.1	| Symbols: ATHB-15, ATHB15, CNA, ICU4 | Homeobox-leucine zipper family protein / lipid-binding START domain-containing protein | chr1:19409913-19413961 REVERSE LENGTH=836	0
chr3LG5_181768832_181768981	mir166	Psat4g221480.2	AT1G52150.3	| Symbols: ATHB-15, ATHB15, CNA, ICU4 | Homeobox-leucine zipper family protein / lipid-binding START domain-containing protein | chr1:19410118-19413961 REVERSE LENGTH=794	0
chr3LG5_181768832_181768981	mir166	Psat7g081800.1	AT1G30100.1	| Symbols: NCED5, ATNCED5 | nine-cis-epoxycarotenoid dioxygenase 5 | chr1:10571383-10573152 FORWARD LENGTH=589	0
chr3LG5_194757971_194758069	mir156	Psat3g164360.1	AT5G50570.2	| Symbols: SPL13A, SPL13 | Squamosa promoter-binding protein-like (SBP domain) transcription factor family protein| chr5:20582555-20583791 REVERSE LENGTH=359	4e-43
chr3LG5_194757971_194758069	mir156	Psat3g164360.2	AT5G50570.2	| Symbols: SPL13A, SPL13 | Squamosa promoter-binding protein-like (SBP domain) transcription factor family protein| chr5:20582555-20583791 REVERSE LENGTH=359	4e-43
chr3LG5_194757971_194758069	mir156	Psat6g101960.1	AT2G42200.1	| Symbols: SPL9, AtSPL9 | squamosa promoter binding protein-like 9 | chr2:17587601-17589451 FORWARD LENGTH=375	2e-54
chr3LG5_194757971_194758069	mir156	Psat3g069560.1	AT2G42200.1	| Symbols: SPL9, AtSPL9 | squamosa promoter binding protein-like 9 | chr2:17587601-17589451 FORWARD LENGTH=375	5e-65
chr3LG5_194757971_194758069	mir156	Psat5g096720.2	AT5G43270.1	| Symbols: SPL2 | squamosa promoter binding protein-like 2 | chr5:17360527-17362143 REVERSE LENGTH=419	3e-59
chr3LG5_194757971_194758069	mir156	Psat5g096720.3	AT5G43270.1	| Symbols: SPL2 | squamosa promoter binding protein-like 2 | chr5:17360527-17362143 REVERSE LENGTH=419	3e-59
chr3LG5_194757971_194758069	mir156	Psat5g096720.1	AT5G43270.1	| Symbols: SPL2 | squamosa promoter binding protein-like 2 | chr5:17360527-17362143 REVERSE LENGTH=419	3e-59
chr3LG5_194757971_194758069	mir156	Psat7g077080.1	AT5G43270.1	| Symbols: SPL2 | squamosa promoter binding protein-like 2 | chr5:17360527-17362143 REVERSE LENGTH=419	7e-54
chr3LG5_194757971_194758069	mir156	Psat7g077080.3	AT5G43270.1	| Symbols: SPL2 | squamosa promoter binding protein-like 2 | chr5:17360527-17362143 REVERSE LENGTH=419	7e-54
chr3LG5_194757971_194758069	mir156	Psat7g077080.2	AT5G43270.1	| Symbols: SPL2 | squamosa promoter binding protein-like 2 | chr5:17360527-17362143 REVERSE LENGTH=419	7e-54
chr3LG5_194757971_194758069	mir156	Psat5g096720.4	AT5G43270.1	| Symbols: SPL2 | squamosa promoter binding protein-like 2 | chr5:17360527-17362143 REVERSE LENGTH=419	7e-57
chr3LG5_194757971_194758069	mir156	Psat2g077800.2	No hits found
chr3LG5_194757971_194758069	mir156	Psat2g077800.3	No hits found
chr3LG5_194757971_194758069	mir156	Psat2g077800.1	No hits found
chr3LG5_194757971_194758069	mir156	Psat3g157680.1	AT1G27360.4	| Symbols: SPL11 | squamosa promoter-like 11 | chr1:9502139-9503715 FORWARD LENGTH=393	7e-38
chr3LG5_194757971_194758069	mir156	Psat5g052160.1	AT5G50570.2	| Symbols: SPL13A, SPL13 | Squamosa promoter-binding protein-like (SBP domain) transcription factor family protein| chr5:20582555-20583791 REVERSE LENGTH=359	1e-67
chr3LG5_194757971_194758069	mir156	Psat1g127000.1	AT1G69170.1	| Symbols: | Squamosa promoter-binding protein-like (SBP domain) transcription factor family protein | chr1:26005626-26007041 FORWARD LENGTH=405	9e-48
chr3LG5_194757971_194758069	mir156	Psat1g127000.2	AT1G69170.1	| Symbols: | Squamosa promoter-binding protein-like (SBP domain) transcription factor family protein | chr1:26005626-26007041 FORWARD LENGTH=405	9e-48
chr3LG5_194757971_194758069	mir156	Psat4g046440.2	AT1G69170.1	| Symbols: | Squamosa promoter-binding protein-like (SBP domain) transcription factor family protein | chr1:26005626-26007041 FORWARD LENGTH=405	4e-48
chr3LG5_194757971_194758069	mir156	Psat4g046440.1	AT1G69170.1	| Symbols: | Squamosa promoter-binding protein-like (SBP domain) transcription factor family protein | chr1:26005626-26007041 FORWARD LENGTH=405	4e-48
chr3LG5_194757971_194758069	mir156	Psat2g133080.1	AT1G69170.1	| Symbols: | Squamosa promoter-binding protein-like (SBP domain) transcription factor family protein | chr1:26005626-26007041 FORWARD LENGTH=405	4e-61
chr3LG5_194757971_194758069	mir156	Psat2g190200.1	AT1G76690.1	| Symbols: OPR2, ATOPR2 | 12-oxophytodienoate reductase 2 | chr1:28778976-28780355 FORWARD LENGTH=374	0
chr3LG5_194757971_194758069	mir156	Psat2g044760.6	AT2G01970.1	| Symbols: | Endomembrane protein 70 protein family | chr2:452197-454819 REVERSE LENGTH=592	0
chr3LG5_194757971_194758069	mir156	Psat2g044760.1	AT2G01970.1	| Symbols: | Endomembrane protein 70 protein family | chr2:452197-454819 REVERSE LENGTH=592	0
chr3LG5_194757971_194758069	mir156	Psat2g044760.5	AT2G01970.1	| Symbols: | Endomembrane protein 70 protein family | chr2:452197-454819 REVERSE LENGTH=592	0
chr3LG5_194757971_194758069	mir156	Psat2g044760.2	AT2G01970.1	| Symbols: | Endomembrane protein 70 protein family | chr2:452197-454819 REVERSE LENGTH=592	0
chr3LG5_194757971_194758069	mir156	Psat2g044760.3	AT2G01970.1	| Symbols: | Endomembrane protein 70 protein family | chr2:452197-454819 REVERSE LENGTH=592	0
chr3LG5_194757971_194758069	mir156	Psat2g044760.4	AT2G01970.1	| Symbols: | Endomembrane protein 70 protein family | chr2:452197-454819 REVERSE LENGTH=592	0
chr3LG5_194757971_194758069	mir156	Psat1g212600.2	AT5G64440.1	| Symbols: AtFAAH, FAAH | fatty acid amide hydrolase | chr5:25766229-25770260 FORWARD LENGTH=607	0
chr3LG5_194757971_194758069	mir156	Psat1g212600.1	AT5G64440.1	| Symbols: AtFAAH, FAAH | fatty acid amide hydrolase | chr5:25766229-25770260 FORWARD LENGTH=607	0
chr3LG5_194757971_194758069	mir156	Psat0s45g0040.1	AT1G48090.1	| Symbols: | calcium-dependent lipid-binding family protein | chr1:17732582-17758194 REVERSE LENGTH=4146	0
chr3LG5_194757971_194758069	mir156	Psat7g132840.2	AT5G08470.1	| Symbols: PEX1 | peroxisome 1 | chr5:2735925-2742731 FORWARD LENGTH=1130	0
chr3LG5_194757971_194758069	mir156	Psat5g175080.1	AT5G15280.1	| Symbols: | Pentatricopeptide repeat (PPR) superfamily protein | chr5:4962293-4965976 FORWARD LENGTH=1227	0
chr3LG5_194757971_194758069	mir156	Psat2g151880.1	AT4G35800.1	| Symbols: NRPB1, RPB1, RNA_POL_II_LSRNA_POL_II_LS, RNA_POL_II_LS | RNA polymerase II large subunit | chr4:16961115-16967892 REVERSE LENGTH=1839	0
chr3LG5_194757971_194758069	mir156	Psat3g055760.1	AT4G28600.1	| Symbols: NPGR2 | no pollen germination related 2 | chr4:14130046-14132599 FORWARD LENGTH=739	0
chr3LG5_194757971_194758069	mir156	Psat3g055760.3	AT4G28600.1	| Symbols: NPGR2 | no pollen germination related 2 | chr4:14130046-14132599 FORWARD LENGTH=739	0
chr3LG5_194757971_194758069	mir156	Psat3g055760.4	AT4G28600.1	| Symbols: NPGR2 | no pollen germination related 2 | chr4:14130046-14132599 FORWARD LENGTH=739	0
chr3LG5_194757971_194758069	mir156	Psat3g055760.2	AT4G28600.1	| Symbols: NPGR2 | no pollen germination related 2 | chr4:14130046-14132599 FORWARD LENGTH=739	0
chr3LG5_194757971_194758069	mir156	Psat1g171040.1	No hits found
chr3LG5_198675088_198675210	mir862_2	Psat5g037000.1	No hits found
chr3LG5_198675088_198675210	mir862_2	Psat6g205280.1	AT3G48950.1	| Symbols: | Pectin lyase-like superfamily protein | chr3:18148017-18149987 FORWARD LENGTH=469	0
chr3LG5_198675088_198675210	mir862_2	Psat5g092560.1	AT3G26120.1	| Symbols: TEL1 | terminal EAR1-like 1 | chr3:9546398-9549186 FORWARD LENGTH=615	3e-125
chr3LG5_198675088_198675210	mir862_2	Psat5g107640.1	AT5G41540.1	| Symbols: | Disease resistance protein (TIR-NBS-LRR class) family | chr5:16612659-16616063 REVERSE LENGTH=1038	1e-71
chr3LG5_198675088_198675210	mir862_2	Psat1g103560.1	AT4G25480.1	| Symbols: DREB1A, CBF3, ATCBF3 | dehydration response element B1A | chr4:13018353-13019003 REVERSE LENGTH=216	7e-61
chr3LG5_198675088_198675210	mir862_2	Psat3g203320.1	AT5G15790.2	| Symbols: | RING/U-box superfamily protein | chr5:5149800-5150964 FORWARD LENGTH=232	3e-89
chr3LG5_198675088_198675210	mir862_2	Psat3g203320.2	AT5G15790.2	| Symbols: | RING/U-box superfamily protein | chr5:5149800-5150964 FORWARD LENGTH=232	3e-89
chr3LG5_198675088_198675210	mir862_2	Psat6g140320.1	AT3G09670.2	| Symbols: | Tudor/PWWP/MBT superfamily protein | chr3:2966637-2968817 FORWARD LENGTH=726	8e-60
chr3LG5_198675088_198675210	mir862_2	Psat6g148880.1	AT1G54780.1	| Symbols: TLP18.3 | thylakoid lumen 18.3 kDa protein | chr1:20439533-20440953 FORWARD LENGTH=285	6e-136
chr3LG5_198675088_198675210	mir862_2	Psat0s3330g0040.1	AT4G15180.1	| Symbols: SDG2, ATXR3 | SET domain protein 2 | chr4:8651999-8662178 FORWARD LENGTH=2335	0
chr3LG5_198675088_198675210	mir862_2	Psat4g196720.2	AT3G16370.1	| Symbols: | GDSL-like Lipase/Acylhydrolase superfamily protein | chr3:5556928-5558351 FORWARD LENGTH=353	5e-145
chr3LG5_198675088_198675210	mir862_2	Psat4g196720.1	AT3G16370.1	| Symbols: | GDSL-like Lipase/Acylhydrolase superfamily protein | chr3:5556928-5558351 FORWARD LENGTH=353	0
chr3LG5_198675088_198675210	mir862_2	Psat3g159880.1	AT5G06900.1	| Symbols: CYP93D1 | cytochrome P450, family 93, subfamily D, polypeptide 1 | chr5:2136160-2137925 REVERSE LENGTH=507	1e-125
chr3LG5_198675088_198675210	mir862_2	Psat1g216560.1	AT5G09410.1	| Symbols: EICBP.B, CAMTA1 | ethylene induced calmodulin binding protein | chr5:2921457-2927291 FORWARD LENGTH=989	0
chr3LG5_198675088_198675210	mir862_2	Psat2g016200.1	AT5G06600.3	| Symbols: UBP12 | ubiquitin-specific protease 12 | chr5:2020682-2027834 REVERSE LENGTH=985	2e-79
chr3LG5_198675088_198675210	mir862_2	Psat7g112840.1	AT4G04920.2	| Symbols: SFR6 | sensitive to freezing 6 | chr4:2497931-2504996 FORWARD LENGTH=1267	0
chr3LG5_235830429_235830578	mir164	Psat1g002400.1	AT1G56010.2	| Symbols: NAC1, ANAC022 | NAC domain containing protein 1 | chr1:20946852-20949144 REVERSE LENGTH=324	1e-128
chr3LG5_235830429_235830578	mir164	Psat4g050600.1	AT5G61430.1	| Symbols: ANAC100, ATNAC5, NAC100 | NAC domain containing protein 100 | chr5:24701328-24702553 REVERSE LENGTH=336	1e-144
chr3LG5_235830429_235830578	mir164	Psat0s2051g0040.1	AT5G53950.1	| Symbols: CUC2, ANAC098, ATCUC2 | NAC (No Apical Meristem) domain transcriptional regulator superfamily protein| chr5:21901966-21903795 REVERSE LENGTH=375	3e-119
chr3LG5_235830429_235830578	mir164	Psat0s5198g0040.1	AT5G53950.1	| Symbols: CUC2, ANAC098, ATCUC2 | NAC (No Apical Meristem) domain transcriptional regulator superfamily protein| chr5:21901966-21903795 REVERSE LENGTH=375	3e-82
chr3LG5_235830429_235830578	mir164	Psat5g193920.1	AT5G61430.1	| Symbols: ANAC100, ATNAC5, NAC100 | NAC domain containing protein 100 | chr5:24701328-24702553 REVERSE LENGTH=336	5e-118
chr3LG5_235830429_235830578	mir164	Psat4g158840.1	AT4G12740.1	| Symbols: | HhH-GPD base excision DNA repair family protein | chr4:7494578-7497596 REVERSE LENGTH=630	2e-164
chr3LG5_235830429_235830578	mir164	Psat4g158840.2	AT4G12740.1	| Symbols: | HhH-GPD base excision DNA repair family protein | chr4:7494578-7497596 REVERSE LENGTH=630	6e-148
chr3LG5_235830429_235830578	mir164	Psat0ss777g0120.1	No hits found
chr3LG5_235830429_235830578	mir164	Psat7g176440.1	AT3G13530.1	| Symbols: MAPKKK7, MAP3KE1 | mitogen-activated protein kinase kinase kinase 7 | chr3:4411934-4419320 REVERSE LENGTH=1368	0
chr3LG5_235830429_235830578	mir164	Psat7g111280.1	AT1G61240.4	| Symbols: | Protein of unknown function (DUF707) | chr1:22582537-22585050 FORWARD LENGTH=425	2e-170
chr3LG5_235830429_235830578	mir164	Psat7g111280.5	AT1G61240.4	| Symbols: | Protein of unknown function (DUF707) | chr1:22582537-22585050 FORWARD LENGTH=425	4e-154
chr3LG5_235830429_235830578	mir164	Psat7g111280.4	AT1G11170.1	| Symbols: | Protein of unknown function (DUF707) | chr1:3741724-3744459 FORWARD LENGTH=438	1e-151
chr3LG5_235830429_235830578	mir164	Psat7g111280.3	AT1G11170.1	| Symbols: | Protein of unknown function (DUF707) | chr1:3741724-3744459 FORWARD LENGTH=438	1e-151
chr3LG5_235830429_235830578	mir164	Psat7g111280.2	AT1G11170.1	| Symbols: | Protein of unknown function (DUF707) | chr1:3741724-3744459 FORWARD LENGTH=438	7e-153
chr3LG5_235830429_235830578	mir164	Psat2g085400.1	AT4G38050.1	| Symbols: | Xanthine/uracil permease family protein | chr4:17869529-17872461 REVERSE LENGTH=709	2e-12
chr3LG5_235838133_235838286	mir164	Psat1g002400.1	AT1G56010.2	| Symbols: NAC1, ANAC022 | NAC domain containing protein 1 | chr1:20946852-20949144 REVERSE LENGTH=324	1e-128
chr3LG5_235838133_235838286	mir164	Psat4g050600.1	AT5G61430.1	| Symbols: ANAC100, ATNAC5, NAC100 | NAC domain containing protein 100 | chr5:24701328-24702553 REVERSE LENGTH=336	1e-144
chr3LG5_235838133_235838286	mir164	Psat0s2051g0040.1	AT5G53950.1	| Symbols: CUC2, ANAC098, ATCUC2 | NAC (No Apical Meristem) domain transcriptional regulator superfamily protein| chr5:21901966-21903795 REVERSE LENGTH=375	3e-119
chr3LG5_235838133_235838286	mir164	Psat0s5198g0040.1	AT5G53950.1	| Symbols: CUC2, ANAC098, ATCUC2 | NAC (No Apical Meristem) domain transcriptional regulator superfamily protein| chr5:21901966-21903795 REVERSE LENGTH=375	3e-82
chr3LG5_235838133_235838286	mir164	Psat5g193920.1	AT5G61430.1	| Symbols: ANAC100, ATNAC5, NAC100 | NAC domain containing protein 100 | chr5:24701328-24702553 REVERSE LENGTH=336	5e-118
chr3LG5_235838133_235838286	mir164	Psat4g158840.1	AT4G12740.1	| Symbols: | HhH-GPD base excision DNA repair family protein | chr4:7494578-7497596 REVERSE LENGTH=630	2e-164
chr3LG5_235838133_235838286	mir164	Psat4g158840.2	AT4G12740.1	| Symbols: | HhH-GPD base excision DNA repair family protein | chr4:7494578-7497596 REVERSE LENGTH=630	6e-148
chr3LG5_235838133_235838286	mir164	Psat0ss777g0120.1	No hits found
chr3LG5_235838133_235838286	mir164	Psat7g176440.1	AT3G13530.1	| Symbols: MAPKKK7, MAP3KE1 | mitogen-activated protein kinase kinase kinase 7 | chr3:4411934-4419320 REVERSE LENGTH=1368	0
chr3LG5_235838133_235838286	mir164	Psat7g111280.1	AT1G61240.4	| Symbols: | Protein of unknown function (DUF707) | chr1:22582537-22585050 FORWARD LENGTH=425	2e-170
chr3LG5_235838133_235838286	mir164	Psat7g111280.5	AT1G61240.4	| Symbols: | Protein of unknown function (DUF707) | chr1:22582537-22585050 FORWARD LENGTH=425	4e-154
chr3LG5_235838133_235838286	mir164	Psat7g111280.4	AT1G11170.1	| Symbols: | Protein of unknown function (DUF707) | chr1:3741724-3744459 FORWARD LENGTH=438	1e-151
chr3LG5_235838133_235838286	mir164	Psat7g111280.3	AT1G11170.1	| Symbols: | Protein of unknown function (DUF707) | chr1:3741724-3744459 FORWARD LENGTH=438	1e-151
chr3LG5_235838133_235838286	mir164	Psat7g111280.2	AT1G11170.1	| Symbols: | Protein of unknown function (DUF707) | chr1:3741724-3744459 FORWARD LENGTH=438	7e-153
chr3LG5_235838133_235838286	mir164	Psat2g085400.1	AT4G38050.1	| Symbols: | Xanthine/uracil permease family protein | chr4:17869529-17872461 REVERSE LENGTH=709	2e-12
chr3LG5_259252384_259252491	mir2111	Psat1g018120.1	AT3G60030.1	| Symbols: SPL12 | squamosa promoter-binding protein-like 12 | chr3:22165856-22169410 REVERSE LENGTH=927	0
chr3LG5_259252384_259252491	mir2111	Psat5g263840.1	AT5G57930.2	| Symbols: APO2 | Arabidopsis thaliana protein of unknown function (DUF794) | chr5:23454690-23456354 FORWARD LENGTH=443	0
chr3LG5_262443436_262443595	mir5770	Psat4g032400.1	AT1G31710.1	| Symbols: | Copper amine oxidase family protein | chr1:11349855-11355339 FORWARD LENGTH=681	0
chr3LG5_262443436_262443595	mir5770	Psat4g032520.1	AT1G31710.1	| Symbols: | Copper amine oxidase family protein | chr1:11349855-11355339 FORWARD LENGTH=681	0
chr3LG5_262443436_262443595	mir5770	Psat6g158120.1	No hits found
chr3LG5_262443436_262443595	mir5770	Psat7g170680.1	AT5G16820.2	| Symbols: HSF3, HSFA1B, ATHSFA1B | heat shock factor 3 | chr5:5530446-5532497 FORWARD LENGTH=481	5e-63
chr3LG5_262443436_262443595	mir5770	Psat7g170680.2	AT5G16820.2	| Symbols: HSF3, HSFA1B, ATHSFA1B | heat shock factor 3 | chr5:5530446-5532497 FORWARD LENGTH=481	5e-63
chr3LG5_262443436_262443595	mir5770	Psat7g170680.5	AT5G16820.2	| Symbols: HSF3, HSFA1B, ATHSFA1B | heat shock factor 3 | chr5:5530446-5532497 FORWARD LENGTH=481	5e-63
chr3LG5_262443436_262443595	mir5770	Psat3g047400.1	AT1G31360.2	| Symbols: RECQL2, MED34 | RECQ helicase L2 | chr1:11233174-11237412 FORWARD LENGTH=580	1e-25
chr3LG5_262443436_262443595	mir5770	Psat7g170680.4	AT5G16820.2	| Symbols: HSF3, HSFA1B, ATHSFA1B | heat shock factor 3 | chr5:5530446-5532497 FORWARD LENGTH=481	9e-140
chr3LG5_262443436_262443595	mir5770	Psat7g170680.3	AT5G16820.2	| Symbols: HSF3, HSFA1B, ATHSFA1B | heat shock factor 3 | chr5:5530446-5532497 FORWARD LENGTH=481	9e-140
chr3LG5_381108659_381108792	mir475	Psat1g033280.1	AT1G12700.1	| Symbols: | ATP binding;nucleic acid binding;helicases | chr1:4323722-4326227 REVERSE LENGTH=735	1e-135
chr3LG5_381108659_381108792	mir475	Psat1g033280.2	AT1G12700.1	| Symbols: | ATP binding;nucleic acid binding;helicases | chr1:4323722-4326227 REVERSE LENGTH=735	1e-135
chr3LG5_381108659_381108792	mir475	Psat1g118800.3	AT1G62930.1	| Symbols: | Tetratricopeptide repeat (TPR)-like superfamily protein | chr1:23306534-23308423 FORWARD LENGTH=629	1e-127
chr3LG5_381108659_381108792	mir475	Psat1g118800.1	AT1G62930.1	| Symbols: | Tetratricopeptide repeat (TPR)-like superfamily protein | chr1:23306534-23308423 FORWARD LENGTH=629	1e-127
chr3LG5_381108659_381108792	mir475	Psat1g118800.2	AT1G62930.1	| Symbols: | Tetratricopeptide repeat (TPR)-like superfamily protein | chr1:23306534-23308423 FORWARD LENGTH=629	1e-127
chr3LG5_381108659_381108792	mir475	Psat1g118800.4	AT1G62930.1	| Symbols: | Tetratricopeptide repeat (TPR)-like superfamily protein | chr1:23306534-23308423 FORWARD LENGTH=629	1e-127
chr3LG5_381108659_381108792	mir475	Psat1g033160.1	AT1G12700.1	| Symbols: | ATP binding;nucleic acid binding;helicases | chr1:4323722-4326227 REVERSE LENGTH=735	2e-126
chr3LG5_381108659_381108792	mir475	Psat1g116280.1	AT1G12700.1	| Symbols: | ATP binding;nucleic acid binding;helicases | chr1:4323722-4326227 REVERSE LENGTH=735	6e-88
chr3LG5_381108659_381108792	mir475	Psat1g116120.1	AT1G62930.1	| Symbols: | Tetratricopeptide repeat (TPR)-like superfamily protein | chr1:23306534-23308423 FORWARD LENGTH=629	5e-113
chr3LG5_381108659_381108792	mir475	Psat1g116200.1	AT1G62930.1	| Symbols: | Tetratricopeptide repeat (TPR)-like superfamily protein | chr1:23306534-23308423 FORWARD LENGTH=629	4e-130
chr3LG5_381108659_381108792	mir475	Psat0s1728g0160.1	AT1G12300.1	| Symbols: | Tetratricopeptide repeat (TPR)-like superfamily protein | chr1:4184163-4186076 REVERSE LENGTH=637	3e-131
chr3LG5_381108659_381108792	mir475	Psat0s1728g0160.3	AT1G12300.1	| Symbols: | Tetratricopeptide repeat (TPR)-like superfamily protein | chr1:4184163-4186076 REVERSE LENGTH=637	3e-131
chr3LG5_381108659_381108792	mir475	Psat0s1728g0160.2	AT1G12300.1	| Symbols: | Tetratricopeptide repeat (TPR)-like superfamily protein | chr1:4184163-4186076 REVERSE LENGTH=637	3e-131
chr3LG5_381108659_381108792	mir475	Psat0s915g0080.1	AT1G62930.1	| Symbols: | Tetratricopeptide repeat (TPR)-like superfamily protein | chr1:23306534-23308423 FORWARD LENGTH=629	4e-132
chr3LG5_381108659_381108792	mir475	Psat1g116240.1	AT1G62930.1	| Symbols: | Tetratricopeptide repeat (TPR)-like superfamily protein | chr1:23306534-23308423 FORWARD LENGTH=629	2e-120
chr3LG5_381108659_381108792	mir475	Psat5g228960.1	AT1G75290.1	| Symbols: | NAD(P)-binding Rossmann-fold superfamily protein | chr1:28253890-28255173 FORWARD LENGTH=318	3e-59
chr3LG5_381108659_381108792	mir475	Psat7g075280.1	AT1G12700.1	| Symbols: | ATP binding;nucleic acid binding;helicases | chr1:4323722-4326227 REVERSE LENGTH=735	1e-120
chr3LG5_381108659_381108792	mir475	Psat2g134200.1	AT1G62670.1	| Symbols: RPF2 | rna processing factor 2 | chr1:23204773-23206665 REVERSE LENGTH=630	1e-127
chr3LG5_381108659_381108792	mir475	Psat7g025800.1	AT1G12700.1	| Symbols: | ATP binding;nucleic acid binding;helicases | chr1:4323722-4326227 REVERSE LENGTH=735	4e-75
chr3LG5_381108659_381108792	mir475	Psat5g296440.1	AT1G62670.1	| Symbols: RPF2 | rna processing factor 2 | chr1:23204773-23206665 REVERSE LENGTH=630	4e-134
chr3LG5_381108659_381108792	mir475	Psat1g119440.1	AT1G63130.1	| Symbols: | Tetratricopeptide repeat (TPR)-like superfamily protein | chr1:23412854-23414746 FORWARD LENGTH=630	1e-83
chr3LG5_381108659_381108792	mir475	Psat1g118480.1	AT1G62930.1	| Symbols: | Tetratricopeptide repeat (TPR)-like superfamily protein | chr1:23306534-23308423 FORWARD LENGTH=629	9e-93
chr3LG5_381108659_381108792	mir475	Psat5g296440.1	AT1G62670.1	| Symbols: RPF2 | rna processing factor 2 | chr1:23204773-23206665 REVERSE LENGTH=630	4e-134
chr3LG5_381108659_381108792	mir475	Psat1g118800.3	AT1G62930.1	| Symbols: | Tetratricopeptide repeat (TPR)-like superfamily protein | chr1:23306534-23308423 FORWARD LENGTH=629	1e-127
chr3LG5_381108659_381108792	mir475	Psat1g118800.2	AT1G62930.1	| Symbols: | Tetratricopeptide repeat (TPR)-like superfamily protein | chr1:23306534-23308423 FORWARD LENGTH=629	1e-127
chr3LG5_381108659_381108792	mir475	Psat1g118800.4	AT1G62930.1	| Symbols: | Tetratricopeptide repeat (TPR)-like superfamily protein | chr1:23306534-23308423 FORWARD LENGTH=629	1e-127
chr3LG5_381108659_381108792	mir475	Psat1g118800.1	AT1G62930.1	| Symbols: | Tetratricopeptide repeat (TPR)-like superfamily protein | chr1:23306534-23308423 FORWARD LENGTH=629	1e-127
chr3LG5_381108659_381108792	mir475	Psat0s1509g0080.1	AT4G34980.1	| Symbols: SLP2 | subtilisin-like serine protease 2 | chr4:16656929-16659223 REVERSE LENGTH=764	1e-52
chr3LG5_381108659_381108792	mir475	Psat1g118800.2	AT1G62930.1	| Symbols: | Tetratricopeptide repeat (TPR)-like superfamily protein | chr1:23306534-23308423 FORWARD LENGTH=629	1e-127
chr3LG5_381108659_381108792	mir475	Psat1g118800.3	AT1G62930.1	| Symbols: | Tetratricopeptide repeat (TPR)-like superfamily protein | chr1:23306534-23308423 FORWARD LENGTH=629	1e-127
chr3LG5_381108659_381108792	mir475	Psat1g118800.4	AT1G62930.1	| Symbols: | Tetratricopeptide repeat (TPR)-like superfamily protein | chr1:23306534-23308423 FORWARD LENGTH=629	1e-127
chr3LG5_381108659_381108792	mir475	Psat1g118800.1	AT1G62930.1	| Symbols: | Tetratricopeptide repeat (TPR)-like superfamily protein | chr1:23306534-23308423 FORWARD LENGTH=629	1e-127
chr3LG5_381108659_381108792	mir475	Psat3g167440.1	AT1G12700.1	| Symbols: | ATP binding;nucleic acid binding;helicases | chr1:4323722-4326227 REVERSE LENGTH=735	2e-125
chr3LG5_381108659_381108792	mir475	Psat2g054200.1	AT5G58430.1	| Symbols: ATEXO70B1, EXO70B1 | exocyst subunit exo70 family protein B1 | chr5:23621460-23623334 REVERSE LENGTH=624	1e-83
chr3LG5_381108659_381108792	mir475	Psat1g033160.1	AT1G12700.1	| Symbols: | ATP binding;nucleic acid binding;helicases | chr1:4323722-4326227 REVERSE LENGTH=735	2e-126
chr3LG5_381108659_381108792	mir475	Psat0s915g0080.1	AT1G62930.1	| Symbols: | Tetratricopeptide repeat (TPR)-like superfamily protein | chr1:23306534-23308423 FORWARD LENGTH=629	4e-132
chr3LG5_381108659_381108792	mir475	Psat1g116120.1	AT1G62930.1	| Symbols: | Tetratricopeptide repeat (TPR)-like superfamily protein | chr1:23306534-23308423 FORWARD LENGTH=629	5e-113
chr3LG5_381108659_381108792	mir475	Psat0s1728g0160.1	AT1G12300.1	| Symbols: | Tetratricopeptide repeat (TPR)-like superfamily protein | chr1:4184163-4186076 REVERSE LENGTH=637	3e-131
chr3LG5_381108659_381108792	mir475	Psat0s1728g0160.2	AT1G12300.1	| Symbols: | Tetratricopeptide repeat (TPR)-like superfamily protein | chr1:4184163-4186076 REVERSE LENGTH=637	3e-131
chr3LG5_381108659_381108792	mir475	Psat0s1728g0160.3	AT1G12300.1	| Symbols: | Tetratricopeptide repeat (TPR)-like superfamily protein | chr1:4184163-4186076 REVERSE LENGTH=637	3e-131
chr3LG5_381108659_381108792	mir475	Psat1g033160.1	AT1G12700.1	| Symbols: | ATP binding;nucleic acid binding;helicases | chr1:4323722-4326227 REVERSE LENGTH=735	2e-126
chr3LG5_381249611_381249818	mir475	Psat1g033280.1	AT1G12700.1	| Symbols: | ATP binding;nucleic acid binding;helicases | chr1:4323722-4326227 REVERSE LENGTH=735	1e-135
chr3LG5_381249611_381249818	mir475	Psat1g033280.2	AT1G12700.1	| Symbols: | ATP binding;nucleic acid binding;helicases | chr1:4323722-4326227 REVERSE LENGTH=735	1e-135
chr3LG5_381249611_381249818	mir475	Psat1g118800.3	AT1G62930.1	| Symbols: | Tetratricopeptide repeat (TPR)-like superfamily protein | chr1:23306534-23308423 FORWARD LENGTH=629	1e-127
chr3LG5_381249611_381249818	mir475	Psat1g118800.1	AT1G62930.1	| Symbols: | Tetratricopeptide repeat (TPR)-like superfamily protein | chr1:23306534-23308423 FORWARD LENGTH=629	1e-127
chr3LG5_381249611_381249818	mir475	Psat1g118800.2	AT1G62930.1	| Symbols: | Tetratricopeptide repeat (TPR)-like superfamily protein | chr1:23306534-23308423 FORWARD LENGTH=629	1e-127
chr3LG5_381249611_381249818	mir475	Psat1g118800.4	AT1G62930.1	| Symbols: | Tetratricopeptide repeat (TPR)-like superfamily protein | chr1:23306534-23308423 FORWARD LENGTH=629	1e-127
chr3LG5_381249611_381249818	mir475	Psat1g033160.1	AT1G12700.1	| Symbols: | ATP binding;nucleic acid binding;helicases | chr1:4323722-4326227 REVERSE LENGTH=735	2e-126
chr3LG5_381249611_381249818	mir475	Psat1g116280.1	AT1G12700.1	| Symbols: | ATP binding;nucleic acid binding;helicases | chr1:4323722-4326227 REVERSE LENGTH=735	6e-88
chr3LG5_381249611_381249818	mir475	Psat1g116120.1	AT1G62930.1	| Symbols: | Tetratricopeptide repeat (TPR)-like superfamily protein | chr1:23306534-23308423 FORWARD LENGTH=629	5e-113
chr3LG5_381249611_381249818	mir475	Psat1g116200.1	AT1G62930.1	| Symbols: | Tetratricopeptide repeat (TPR)-like superfamily protein | chr1:23306534-23308423 FORWARD LENGTH=629	4e-130
chr3LG5_381249611_381249818	mir475	Psat0s1728g0160.1	AT1G12300.1	| Symbols: | Tetratricopeptide repeat (TPR)-like superfamily protein | chr1:4184163-4186076 REVERSE LENGTH=637	3e-131
chr3LG5_381249611_381249818	mir475	Psat0s1728g0160.3	AT1G12300.1	| Symbols: | Tetratricopeptide repeat (TPR)-like superfamily protein | chr1:4184163-4186076 REVERSE LENGTH=637	3e-131
chr3LG5_381249611_381249818	mir475	Psat0s1728g0160.2	AT1G12300.1	| Symbols: | Tetratricopeptide repeat (TPR)-like superfamily protein | chr1:4184163-4186076 REVERSE LENGTH=637	3e-131
chr3LG5_381249611_381249818	mir475	Psat0s915g0080.1	AT1G62930.1	| Symbols: | Tetratricopeptide repeat (TPR)-like superfamily protein | chr1:23306534-23308423 FORWARD LENGTH=629	4e-132
chr3LG5_381249611_381249818	mir475	Psat1g116240.1	AT1G62930.1	| Symbols: | Tetratricopeptide repeat (TPR)-like superfamily protein | chr1:23306534-23308423 FORWARD LENGTH=629	2e-120
chr3LG5_381249611_381249818	mir475	Psat5g228960.1	AT1G75290.1	| Symbols: | NAD(P)-binding Rossmann-fold superfamily protein | chr1:28253890-28255173 FORWARD LENGTH=318	3e-59
chr3LG5_381249611_381249818	mir475	Psat7g075280.1	AT1G12700.1	| Symbols: | ATP binding;nucleic acid binding;helicases | chr1:4323722-4326227 REVERSE LENGTH=735	1e-120
chr3LG5_381249611_381249818	mir475	Psat2g134200.1	AT1G62670.1	| Symbols: RPF2 | rna processing factor 2 | chr1:23204773-23206665 REVERSE LENGTH=630	1e-127
chr3LG5_381249611_381249818	mir475	Psat7g025800.1	AT1G12700.1	| Symbols: | ATP binding;nucleic acid binding;helicases | chr1:4323722-4326227 REVERSE LENGTH=735	4e-75
chr3LG5_381249611_381249818	mir475	Psat5g296440.1	AT1G62670.1	| Symbols: RPF2 | rna processing factor 2 | chr1:23204773-23206665 REVERSE LENGTH=630	4e-134
chr3LG5_381249611_381249818	mir475	Psat1g119440.1	AT1G63130.1	| Symbols: | Tetratricopeptide repeat (TPR)-like superfamily protein | chr1:23412854-23414746 FORWARD LENGTH=630	1e-83
chr3LG5_381249611_381249818	mir475	Psat1g118480.1	AT1G62930.1	| Symbols: | Tetratricopeptide repeat (TPR)-like superfamily protein | chr1:23306534-23308423 FORWARD LENGTH=629	9e-93
chr3LG5_381249611_381249818	mir475	Psat5g296440.1	AT1G62670.1	| Symbols: RPF2 | rna processing factor 2 | chr1:23204773-23206665 REVERSE LENGTH=630	4e-134
chr3LG5_381249611_381249818	mir475	Psat1g118800.3	AT1G62930.1	| Symbols: | Tetratricopeptide repeat (TPR)-like superfamily protein | chr1:23306534-23308423 FORWARD LENGTH=629	1e-127
chr3LG5_381249611_381249818	mir475	Psat1g118800.4	AT1G62930.1	| Symbols: | Tetratricopeptide repeat (TPR)-like superfamily protein | chr1:23306534-23308423 FORWARD LENGTH=629	1e-127
chr3LG5_381249611_381249818	mir475	Psat1g118800.1	AT1G62930.1	| Symbols: | Tetratricopeptide repeat (TPR)-like superfamily protein | chr1:23306534-23308423 FORWARD LENGTH=629	1e-127
chr3LG5_381249611_381249818	mir475	Psat1g118800.2	AT1G62930.1	| Symbols: | Tetratricopeptide repeat (TPR)-like superfamily protein | chr1:23306534-23308423 FORWARD LENGTH=629	1e-127
chr3LG5_381249611_381249818	mir475	Psat0s1509g0080.1	AT4G34980.1	| Symbols: SLP2 | subtilisin-like serine protease 2 | chr4:16656929-16659223 REVERSE LENGTH=764	1e-52
chr3LG5_381249611_381249818	mir475	Psat1g118800.2	AT1G62930.1	| Symbols: | Tetratricopeptide repeat (TPR)-like superfamily protein | chr1:23306534-23308423 FORWARD LENGTH=629	1e-127
chr3LG5_381249611_381249818	mir475	Psat1g118800.3	AT1G62930.1	| Symbols: | Tetratricopeptide repeat (TPR)-like superfamily protein | chr1:23306534-23308423 FORWARD LENGTH=629	1e-127
chr3LG5_381249611_381249818	mir475	Psat1g118800.4	AT1G62930.1	| Symbols: | Tetratricopeptide repeat (TPR)-like superfamily protein | chr1:23306534-23308423 FORWARD LENGTH=629	1e-127
chr3LG5_381249611_381249818	mir475	Psat1g118800.1	AT1G62930.1	| Symbols: | Tetratricopeptide repeat (TPR)-like superfamily protein | chr1:23306534-23308423 FORWARD LENGTH=629	1e-127
chr3LG5_381249611_381249818	mir475	Psat3g167440.1	AT1G12700.1	| Symbols: | ATP binding;nucleic acid binding;helicases | chr1:4323722-4326227 REVERSE LENGTH=735	2e-125
chr3LG5_381249611_381249818	mir475	Psat2g054200.1	AT5G58430.1	| Symbols: ATEXO70B1, EXO70B1 | exocyst subunit exo70 family protein B1 | chr5:23621460-23623334 REVERSE LENGTH=624	1e-83
chr3LG5_381249611_381249818	mir475	Psat1g033160.1	AT1G12700.1	| Symbols: | ATP binding;nucleic acid binding;helicases | chr1:4323722-4326227 REVERSE LENGTH=735	2e-126
chr3LG5_381249611_381249818	mir475	Psat0s915g0080.1	AT1G62930.1	| Symbols: | Tetratricopeptide repeat (TPR)-like superfamily protein | chr1:23306534-23308423 FORWARD LENGTH=629	4e-132
chr3LG5_381249611_381249818	mir475	Psat1g116120.1	AT1G62930.1	| Symbols: | Tetratricopeptide repeat (TPR)-like superfamily protein | chr1:23306534-23308423 FORWARD LENGTH=629	5e-113
chr3LG5_381249611_381249818	mir475	Psat0s1728g0160.1	AT1G12300.1	| Symbols: | Tetratricopeptide repeat (TPR)-like superfamily protein | chr1:4184163-4186076 REVERSE LENGTH=637	3e-131
chr3LG5_381249611_381249818	mir475	Psat0s1728g0160.2	AT1G12300.1	| Symbols: | Tetratricopeptide repeat (TPR)-like superfamily protein | chr1:4184163-4186076 REVERSE LENGTH=637	3e-131
chr3LG5_381249611_381249818	mir475	Psat0s1728g0160.3	AT1G12300.1	| Symbols: | Tetratricopeptide repeat (TPR)-like superfamily protein | chr1:4184163-4186076 REVERSE LENGTH=637	3e-131
chr3LG5_381249611_381249818	mir475	Psat1g033160.1	AT1G12700.1	| Symbols: | ATP binding;nucleic acid binding;helicases | chr1:4323722-4326227 REVERSE LENGTH=735	2e-126
chr3LG5_422652492_422652574		Psat0s2818g0120.1	No hits found
chr3LG5_422652492_422652574		Psat1g124560.1	AT3G06240.1	| Symbols: | F-box family protein | chr3:1887336-1888619 FORWARD LENGTH=427	6e-15
chr3LG5_422652492_422652574		Psat6g012000.1	AT4G34310.1	| Symbols: | alpha/beta-Hydrolases superfamily protein | chr4:16414113-16419542 FORWARD LENGTH=1228	0
chr3LG5_422652492_422652574		Psat6g171920.1	AT3G10640.1	| Symbols: VPS60.1 | SNF7 family protein | chr3:3323501-3324905 REVERSE LENGTH=235	4e-142
chr3LG5_422652492_422652574		Psat1g128800.1	No hits found
chr3LG5_422652492_422652574		Psat1g123840.1	AT3G06240.1	| Symbols: | F-box family protein | chr3:1887336-1888619 FORWARD LENGTH=427	5e-13
chr3LG5_422652492_422652574		Psat3g135040.2	AT5G01030.2	| Symbols: | Protein of unknown function (DUF3527) | chr5:10638-13003 FORWARD LENGTH=744	2e-62
chr3LG5_422652492_422652574		Psat3g135040.1	AT5G01030.2	| Symbols: | Protein of unknown function (DUF3527) | chr5:10638-13003 FORWARD LENGTH=744	2e-62
chr3LG5_422652492_422652574		Psat3g135040.3	AT5G01030.2	| Symbols: | Protein of unknown function (DUF3527) | chr5:10638-13003 FORWARD LENGTH=744	2e-62
chr3LG5_422652492_422652574		Psat7g013560.1	AT3G13227.1	| Symbols: | serine-rich protein-related | chr3:4258028-4258363 FORWARD LENGTH=111	2e-07
chr3LG5_422652492_422652574		Psat4g111760.1	AT1G32080.1	| Symbols: | membrane protein, putative | chr1:11537572-11539756 REVERSE LENGTH=512	0
chr3LG5_422652492_422652574		Psat3g144480.1	AT5G28530.1	| Symbols: FRS10 | FAR1-related sequence 10 | chr5:10525078-10527300 REVERSE LENGTH=685	4e-11
chr3LG5_422652492_422652574		Psat2g055760.1	AT3G09670.2	| Symbols: | Tudor/PWWP/MBT superfamily protein | chr3:2966637-2968817 FORWARD LENGTH=726	2e-54
chr3LG5_422652492_422652574		Psat7g076600.1	AT3G07880.1	| Symbols: SCN1 | Immunoglobulin E-set superfamily protein | chr3:2514175-2515544 FORWARD LENGTH=240	1e-87
chr3LG5_422652492_422652574		Psat3g068240.1	AT4G13430.1	| Symbols: IIL1, ATLEUC1 | isopropyl malate isomerase large subunit 1 | chr4:7804194-7807789 REVERSE LENGTH=509	1e-138
chr3LG5_422652492_422652574		Psat6g107560.1	AT4G13430.1	| Symbols: IIL1, ATLEUC1 | isopropyl malate isomerase large subunit 1 | chr4:7804194-7807789 REVERSE LENGTH=509	0
chr3LG5_422652492_422652574		Psat4g110720.1	AT1G32100.1	| Symbols: ATPRR1, PRR1 | pinoresinol reductase 1 | chr1:11546472-11547953 REVERSE LENGTH=317	4e-154
chr3LG5_422652492_422652574		Psat0s7414g0040.1	AT3G06240.1	| Symbols: | F-box family protein | chr3:1887336-1888619 FORWARD LENGTH=427	8e-22
chr3LG5_422652492_422652574		Psat2g002840.1	AT3G06240.1	| Symbols: | F-box family protein | chr3:1887336-1888619 FORWARD LENGTH=427	7e-21
chr3LG5_422652492_422652574		Psat6g149160.1	AT3G06240.1	| Symbols: | F-box family protein | chr3:1887336-1888619 FORWARD LENGTH=427	5e-19
chr3LG5_422652492_422652574		Psat2g005280.1	AT3G06240.1	| Symbols: | F-box family protein | chr3:1887336-1888619 FORWARD LENGTH=427	2e-19
chr3LG5_422652492_422652574		Psat4g161440.1	AT3G61780.1	| Symbols: emb1703 | embryo defective 1703 | chr3:22867814-22871462 REVERSE LENGTH=1121	0
chr3LG5_422652492_422652574		Psat7g160480.1	AT4G29090.1	| Symbols: | Ribonuclease H-like superfamily protein | chr4:14333528-14335255 FORWARD LENGTH=575	1e-06
chr3LG5_422652492_422652574		Psat5g226840.1	AT5G09870.1	| Symbols: CESA5 | cellulose synthase 5 | chr5:3073356-3077974 FORWARD LENGTH=1069	0
chr3LG5_422652492_422652574		Psat5g292000.1	AT5G42905.1	| Symbols: | Polynucleotidyl transferase, ribonuclease H-like superfamily protein | chr5:17201414-17202323 REVERSE LENGTH=258	2e-06
chr4LG4_7037616_7037726	mir171_1	Psat3g163480.1	AT4G00150.1	| Symbols: HAM3, ATHAM3, LOM3 | GRAS family transcription factor | chr4:57429-59105 REVERSE LENGTH=558	5e-140
chr4LG4_7037616_7037726	mir171_1	Psat7g236360.1	AT4G00150.1	| Symbols: HAM3, ATHAM3, LOM3 | GRAS family transcription factor | chr4:57429-59105 REVERSE LENGTH=558	2e-125
chr4LG4_7037616_7037726	mir171_1	Psat6g052800.1	AT1G10390.2	| Symbols: | Nucleoporin autopeptidase | chr1:3407265-3412045 REVERSE LENGTH=1041	0
chr4LG4_7037616_7037726	mir171_1	Psat6g052800.2	AT1G10390.2	| Symbols: | Nucleoporin autopeptidase | chr1:3407265-3412045 REVERSE LENGTH=1041	0
chr4LG4_7037616_7037726	mir171_1	Psat4g091760.1	AT4G36710.1	| Symbols: | GRAS family transcription factor | chr4:17306060-17307520 FORWARD LENGTH=486	2e-165
chr4LG4_7037616_7037726	mir171_1	Psat0s4221g0160.1	No hits found
chr4LG4_7037616_7037726	mir171_1	Psat4g126320.1	No hits found
chr4LG4_7037616_7037726	mir171_1	Psat4g071840.1	No hits found
chr4LG4_10354484_10354629	mir1507	Psat6g088040.1	AT3G14470.1	| Symbols: | NB-ARC domain-containing disease resistance protein | chr3:4857940-4861104 FORWARD LENGTH=1054	2e-96
chr4LG4_10354484_10354629	mir1507	Psat7g093800.1	AT3G14470.1	| Symbols: | NB-ARC domain-containing disease resistance protein | chr3:4857940-4861104 FORWARD LENGTH=1054	1e-25
chr4LG4_10354484_10354629	mir1507	Psat5g210600.1	AT4G30080.1	| Symbols: ARF16 | auxin response factor 16 | chr4:14703369-14705564 REVERSE LENGTH=670	3e-101
chr4LG4_10354484_10354629	mir1507	Psat7g218360.2	AT4G30080.1	| Symbols: ARF16 | auxin response factor 16 | chr4:14703369-14705564 REVERSE LENGTH=670	2e-111
chr4LG4_10354484_10354629	mir1507	Psat7g218360.1	AT4G30080.1	| Symbols: ARF16 | auxin response factor 16 | chr4:14703369-14705564 REVERSE LENGTH=670	2e-111
chr4LG4_10354484_10354629	mir1507	Psat5g054160.1	AT4G30080.1	| Symbols: ARF16 | auxin response factor 16 | chr4:14703369-14705564 REVERSE LENGTH=670	2e-95
chr4LG4_10354484_10354629	mir1507	Psat5g210680.1	AT4G30080.1	| Symbols: ARF16 | auxin response factor 16 | chr4:14703369-14705564 REVERSE LENGTH=670	2e-125
chr4LG4_10354484_10354629	mir1507	Psat5g054120.1	AT4G30080.1	| Symbols: ARF16 | auxin response factor 16 | chr4:14703369-14705564 REVERSE LENGTH=670	1e-107
chr4LG4_10354484_10354629	mir1507	Psat3g043840.1	AT4G30080.1	| Symbols: ARF16 | auxin response factor 16 | chr4:14703369-14705564 REVERSE LENGTH=670	9e-141
chr4LG4_10354484_10354629	mir1507	Psat3g043080.1	AT4G30080.1	| Symbols: ARF16 | auxin response factor 16 | chr4:14703369-14705564 REVERSE LENGTH=670	2e-159
chr4LG4_10354484_10354629	mir1507	Psat3g042800.1	AT4G30080.1	| Symbols: ARF16 | auxin response factor 16 | chr4:14703369-14705564 REVERSE LENGTH=670	9e-132
chr4LG4_10354484_10354629	mir1507	Psat5g280280.1	AT2G28320.1	| Symbols: | Pleckstrin homology (PH) and lipid-binding START domains-containing protein | chr2:12095161-12099424 FORWARD LENGTH=737	0
chr4LG4_10361143_10361258	mir1507-m	Psat5g078040.1	AT3G14470.1	| Symbols: | NB-ARC domain-containing disease resistance protein | chr3:4857940-4861104 FORWARD LENGTH=1054	4e-22
chr4LG4_10361143_10361258	mir1507-m	Psat6g088040.1	AT3G14470.1	| Symbols: | NB-ARC domain-containing disease resistance protein | chr3:4857940-4861104 FORWARD LENGTH=1054	2e-96
chr4LG4_10361143_10361258	mir1507-m	Psat3g074200.1	AT3G14470.1	| Symbols: | NB-ARC domain-containing disease resistance protein | chr3:4857940-4861104 FORWARD LENGTH=1054	4e-48
chr4LG4_10361143_10361258	mir1507-m	Psat0s2064g0080.1	AT3G14470.1	| Symbols: | NB-ARC domain-containing disease resistance protein | chr3:4857940-4861104 FORWARD LENGTH=1054	2e-32
chr4LG4_10361143_10361258	mir1507-m	Psat3g074240.2	AT3G14470.1	| Symbols: | NB-ARC domain-containing disease resistance protein | chr3:4857940-4861104 FORWARD LENGTH=1054	1e-81
chr4LG4_10361143_10361258	mir1507-m	Psat3g074240.4	AT3G14470.1	| Symbols: | NB-ARC domain-containing disease resistance protein | chr3:4857940-4861104 FORWARD LENGTH=1054	1e-81
chr4LG4_10361143_10361258	mir1507-m	Psat3g074240.5	AT3G14470.1	| Symbols: | NB-ARC domain-containing disease resistance protein | chr3:4857940-4861104 FORWARD LENGTH=1054	7e-92
chr4LG4_10361143_10361258	mir1507-m	Psat3g074240.1	AT3G14470.1	| Symbols: | NB-ARC domain-containing disease resistance protein | chr3:4857940-4861104 FORWARD LENGTH=1054	7e-92
chr4LG4_10361143_10361258	mir1507-m	Psat3g073280.1	AT3G14470.1	| Symbols: | NB-ARC domain-containing disease resistance protein | chr3:4857940-4861104 FORWARD LENGTH=1054	1e-80
chr4LG4_10361143_10361258	mir1507-m	Psat3g074240.3	AT3G14470.1	| Symbols: | NB-ARC domain-containing disease resistance protein | chr3:4857940-4861104 FORWARD LENGTH=1054	7e-98
chr4LG4_10361143_10361258	mir1507-m	Psat2g060160.1	AT3G14470.1	| Symbols: | NB-ARC domain-containing disease resistance protein | chr3:4857940-4861104 FORWARD LENGTH=1054	3e-31
chr4LG4_10361143_10361258	mir1507-m	Psat5g261840.1	No hits found
chr4LG4_10361143_10361258	mir1507-m	Psat7g093800.1	AT3G14470.1	| Symbols: | NB-ARC domain-containing disease resistance protein | chr3:4857940-4861104 FORWARD LENGTH=1054	1e-25
chr4LG4_10361143_10361258	mir1507-m	Psat5g220960.1	AT3G14470.1	| Symbols: | NB-ARC domain-containing disease resistance protein | chr3:4857940-4861104 FORWARD LENGTH=1054	2e-45
chr4LG4_10361143_10361258	mir1507-m	Psat5g220960.2	AT3G14470.1	| Symbols: | NB-ARC domain-containing disease resistance protein | chr3:4857940-4861104 FORWARD LENGTH=1054	2e-45
chr4LG4_10361143_10361258	mir1507-m	Psat3g074160.1	AT3G14470.1	| Symbols: | NB-ARC domain-containing disease resistance protein | chr3:4857940-4861104 FORWARD LENGTH=1054	3e-34
chr4LG4_10361143_10361258	mir1507-m	Psat3g073240.1	AT3G14470.1	| Symbols: | NB-ARC domain-containing disease resistance protein | chr3:4857940-4861104 FORWARD LENGTH=1054	7e-25
chr4LG4_10361143_10361258	mir1507-m	Psat0s3302g0040.1	AT1G02205.2	| Symbols: CER1 | Fatty acid hydroxylase superfamily | chr1:418818-422154 FORWARD LENGTH=625	0
chr4LG4_60884686_60884843	mir171_1	Psat7g236360.1	AT4G00150.1	| Symbols: HAM3, ATHAM3, LOM3 | GRAS family transcription factor | chr4:57429-59105 REVERSE LENGTH=558	2e-125
chr4LG4_60884686_60884843	mir171_1	Psat3g163480.1	AT4G00150.1	| Symbols: HAM3, ATHAM3, LOM3 | GRAS family transcription factor | chr4:57429-59105 REVERSE LENGTH=558	5e-140
chr4LG4_60884686_60884843	mir171_1	Psat5g133360.1	AT4G08250.1	| Symbols: | GRAS family transcription factor | chr4:5196787-5198238 FORWARD LENGTH=483	9e-154
chr4LG4_60884686_60884843	mir171_1	Psat6g052800.1	AT1G10390.2	| Symbols: | Nucleoporin autopeptidase | chr1:3407265-3412045 REVERSE LENGTH=1041	0
chr4LG4_60884686_60884843	mir171_1	Psat6g052800.2	AT1G10390.2	| Symbols: | Nucleoporin autopeptidase | chr1:3407265-3412045 REVERSE LENGTH=1041	0
chr4LG4_61563150_61563271	mir396	Psat7g177840.1	AT5G23210.1	| Symbols: SCPL34 | serine carboxypeptidase-like 34 | chr5:7810892-7814837 FORWARD LENGTH=499	0
chr4LG4_61563150_61563271	mir396	Psat7g125000.1	AT2G15680.1	| Symbols: | Calcium-binding EF-hand family protein | chr2:6831024-6831587 FORWARD LENGTH=187	3e-76
chr4LG4_61563150_61563271	mir396	Psat1g029400.1	AT1G05600.2	| Symbols: | Tetratricopeptide repeat (TPR)-like superfamily protein | chr1:1672161-1673675 FORWARD LENGTH=504	0
chr4LG4_61563150_61563271	mir396	Psat7g260240.1	AT1G15980.1	| Symbols: NDF1, NDH48 | NDH-dependent cyclic electron flow 1 | chr1:5489314-5491199 FORWARD LENGTH=461	0
chr4LG4_61563150_61563271	mir396	Psat7g260240.3	AT1G15980.1	| Symbols: NDF1, NDH48 | NDH-dependent cyclic electron flow 1 | chr1:5489314-5491199 FORWARD LENGTH=461	0
chr4LG4_61563150_61563271	mir396	Psat7g260240.2	AT1G15980.1	| Symbols: NDF1, NDH48 | NDH-dependent cyclic electron flow 1 | chr1:5489314-5491199 FORWARD LENGTH=461	1e-166
chr4LG4_61563150_61563271	mir396	Psat7g260240.5	AT1G15980.1	| Symbols: NDF1, NDH48 | NDH-dependent cyclic electron flow 1 | chr1:5489314-5491199 FORWARD LENGTH=461	1e-166
chr4LG4_61563150_61563271	mir396	Psat1g197400.1	AT1G16030.1	| Symbols: Hsp70b | heat shock protein 70B | chr1:5502386-5504326 REVERSE LENGTH=646	0
chr4LG4_61563150_61563271	mir396	Psat2g143800.1	AT2G41342.1	| Symbols: | unknown protein; FUNCTIONS IN: molecular_function unknown; INVOLVED IN: biological_process unknown;LOCATED IN: cellular_component unknown; Has 30201 Blast hits to 17322 proteins in 780 species: Archae - 12; Bacteria- 1396; Metazoa - 17338; Fungi - 3422; Plants - 5037; Viruses- 0; Other Eukaryotes - 2996 (source: NCBI BLink). | chr2:17230650-17230898 REVERSE LENGTH=82	4e-13
chr4LG4_61563150_61563271	mir396	Psat7g125880.1	AT4G34131.1	| Symbols: UGT73B3 | UDP-glucosyl transferase 73B3 | chr4:16343268-16344713 REVERSE LENGTH=481	3e-154
chr4LG4_61563150_61563271	mir396	Psat0s1646g0360.1	AT5G41980.1	| Symbols: | CONTAINS InterPro DOMAIN/s: Putative harbinger transposase-derived nuclease (InterPro:IPR006912);BEST Arabidopsis thaliana protein match is: unknown protein(TAIR:AT1G43722.1); Has 1807 Blast hits to 1807 proteins in 277 species: Archae - 0; Bacteria - 0; Metazoa - 736; Fungi- 347; Plants - 385; Viruses - 0; Other Eukaryotes - 339(source: NCBI BLink). | chr5:16793765-16794889 FORWARD …	1e-20
chr4LG4_61563150_61563271	mir396	Psat7g219160.1	AT5G41980.1	| Symbols: | CONTAINS InterPro DOMAIN/s: Putative harbinger transposase-derived nuclease (InterPro:IPR006912);BEST Arabidopsis thaliana protein match is: unknown protein(TAIR:AT1G43722.1); Has 1807 Blast hits to 1807 proteins in 277 species: Archae - 0; Bacteria - 0; Metazoa - 736; Fungi- 347; Plants - 385; Viruses - 0; Other Eukaryotes - 339(source: NCBI BLink). | chr5:16793765-16794889 FORWARD …	1e-14
chr4LG4_61563150_61563271	mir396	Psat6g014440.1	No hits found
chr4LG4_61563150_61563271	mir396	Psat6g144320.1	AT3G04350.1	| Symbols: | Plant protein of unknown function (DUF946) | chr3:1153972-1156469 REVERSE LENGTH=567	0
chr4LG4_61563150_61563271	mir396	Psat7g227480.1	AT1G71350.1	| Symbols: | eukaryotic translation initiation factor SUI1 family protein | chr1:26888525-26891209 REVERSE LENGTH=597	0
chr4LG4_61563150_61563271	mir396	Psat6g017120.1	AT2G22840.1	| Symbols: AtGRF1, GRF1 | growth-regulating factor 1 | chr2:9728841-9731141 FORWARD LENGTH=530	1e-93
chr4LG4_61563150_61563271	mir396	Psat7g111000.1	AT1G61215.1	| Symbols: BRD4 | bromodomain 4 | chr1:22573173-22575374 FORWARD LENGTH=475	1e-89
chr4LG4_61563150_61563271	mir396	Psat0s1966g0120.1	AT2G45480.1	| Symbols: AtGRF9, GRF9 | growth-regulating factor 9 | chr2:18745583-18747403 FORWARD LENGTH=429	7e-33
chr4LG4_61563150_61563271	mir396	Psat0s1966g0120.2	AT2G45480.1	| Symbols: AtGRF9, GRF9 | growth-regulating factor 9 | chr2:18745583-18747403 FORWARD LENGTH=429	6e-33
chr4LG4_61563150_61563271	mir396	Psat5g073400.1	AT4G37740.1	| Symbols: AtGRF2, GRF2 | growth-regulating factor 2 | chr4:17725533-17727609 REVERSE LENGTH=535	1e-29
chr4LG4_61563150_61563271	mir396	Psat4g016760.2	AT3G13960.1	| Symbols: AtGRF5, GRF5 | growth-regulating factor 5 | chr3:4608526-4610160 FORWARD LENGTH=397	5e-52
chr4LG4_61563150_61563271	mir396	Psat4g016760.1	AT3G13960.1	| Symbols: AtGRF5, GRF5 | growth-regulating factor 5 | chr3:4608526-4610160 FORWARD LENGTH=397	5e-52
chr4LG4_61563150_61563271	mir396	Psat1g169560.1	AT1G36320.1	| Symbols: | unknown protein; BEST Arabidopsis thaliana protein match is: unknown protein (TAIR:AT4G37920.1);Has 93 Blast hits to 90 proteins in 22 species: Archae - 0;Bacteria - 0; Metazoa - 0; Fungi - 0; Plants - 85; Viruses- 0; Other Eukaryotes - 8 (source: NCBI BLink). | chr1:13671876-13673939 FORWARD LENGTH=414	4e-164
chr4LG4_61563150_61563271	mir396	Psat3g034600.1	AT3G52910.1	| Symbols: AtGRF4, GRF4 | growth-regulating factor 4 | chr3:19616177-19618268 REVERSE LENGTH=380	2e-96
chr4LG4_61563150_61563271	mir396	Psat4g182160.2	AT3G13960.1	| Symbols: AtGRF5, GRF5 | growth-regulating factor 5 | chr3:4608526-4610160 FORWARD LENGTH=397	3e-64
chr4LG4_61563150_61563271	mir396	Psat4g182160.1	AT3G13960.1	| Symbols: AtGRF5, GRF5 | growth-regulating factor 5 | chr3:4608526-4610160 FORWARD LENGTH=397	1e-64
chr4LG4_61563150_61563271	mir396	Psat1g133440.1	AT3G13960.1	| Symbols: AtGRF5, GRF5 | growth-regulating factor 5 | chr3:4608526-4610160 FORWARD LENGTH=397	7e-55
chr4LG4_61563150_61563271	mir396	Psat2g141480.2	AT3G13960.1	| Symbols: AtGRF5, GRF5 | growth-regulating factor 5 | chr3:4608526-4610160 FORWARD LENGTH=397	2e-39
chr4LG4_61563150_61563271	mir396	Psat2g141480.1	AT3G13960.1	| Symbols: AtGRF5, GRF5 | growth-regulating factor 5 | chr3:4608526-4610160 FORWARD LENGTH=397	2e-39
chr4LG4_61563150_61563271	mir396	Psat4g016760.3	AT2G06200.1	| Symbols: AtGRF6, GRF6 | growth-regulating factor 6 | chr2:2426340-2427255 FORWARD LENGTH=244	2e-26
chr4LG4_61563150_61563271	mir396	Psat7g155280.1	AT3G13960.1	| Symbols: AtGRF5, GRF5 | growth-regulating factor 5 | chr3:4608526-4610160 FORWARD LENGTH=397	1e-41
chr4LG4_61563150_61563271	mir396	Psat2g141480.3	No hits found
chr4LG4_61563150_61563271	mir396	Psat2g141480.4	No hits found
chr4LG4_61563150_61563271	mir396	Psat7g218720.1	No hits found
chr4LG4_61563150_61563271	mir396	Psat2g140800.1	No hits found
chr4LG4_61563150_61563271	mir396	Psat3g121680.1	AT3G53580.1	| Symbols: | diaminopimelate epimerase family protein | chr3:19864784-19866907 FORWARD LENGTH=362	0
chr4LG4_61563150_61563271	mir396	Psat3g121680.2	AT3G53580.1	| Symbols: | diaminopimelate epimerase family protein | chr3:19864784-19866907 FORWARD LENGTH=362	5e-160
chr4LG4_61563150_61563271	mir396	Psat2g139760.1	AT3G07040.1	| Symbols: RPM1, RPS3 | NB-ARC domain-containing disease resistance protein | chr3:2226244-2229024 REVERSE LENGTH=926	9e-147
chr4LG4_61563150_61563271	mir396	Psat7g125920.1	AT4G34131.1	| Symbols: UGT73B3 | UDP-glucosyl transferase 73B3 | chr4:16343268-16344713 REVERSE LENGTH=481	8e-176
chr4LG4_61563150_61563271	mir396	Psat4g090200.1	AT2G23740.2	| Symbols: | nucleic acid binding;sequence-specific DNA binding transcription factors;zinc ion binding | chr2:10098213-10103229 FORWARD LENGTH=1382	2e-97
chr4LG4_61563150_61563271	mir396	Psat3g061280.1	AT3G63380.1	| Symbols: | ATPase E1-E2 type family protein / haloacid dehalogenase-like hydrolase family protein | chr3:23407112-23410213 REVERSE LENGTH=1033	0
chr4LG4_61563150_61563271	mir396	Psat2g026520.1	AT1G55250.3	| Symbols: HUB2 | histone mono-ubiquitination 2 | chr1:20607214-20612302 FORWARD LENGTH=899	0
chr4LG4_61563150_61563271	mir396	Psat1g174280.1	AT4G17220.1	| Symbols: ATMAP70-5, MAP70-5 | microtubule-associated proteins 70-5 | chr4:9657008-9659405 REVERSE LENGTH=513	8e-175
chr4LG4_61563150_61563271	mir396	Psat0s1262g0160.1	AT4G38580.1	| Symbols: ATFP6, HIPP26, FP6 | farnesylated protein 6 | chr4:18034596-18035693 FORWARD LENGTH=153	4e-40
chr4LG4_61563150_61563271	mir396	Psat0s1262g0320.1	AT4G38580.1	| Symbols: ATFP6, HIPP26, FP6 | farnesylated protein 6 | chr4:18034596-18035693 FORWARD LENGTH=153	5e-46
chr4LG4_61563150_61563271	mir396	Psat4g194320.1	AT1G51760.1	| Symbols: IAR3, JR3 | peptidase M20/M25/M40 family protein | chr1:19199562-19201424 FORWARD LENGTH=440	0
chr4LG4_62462066_62462189	mir396	Psat7g218720.1	No hits found
chr4LG4_62462066_62462189	mir396	Psat2g140800.1	No hits found
chr4LG4_62462066_62462189	mir396	Psat2g141480.4	No hits found
chr4LG4_62462066_62462189	mir396	Psat2g141480.3	No hits found
chr4LG4_62462066_62462189	mir396	Psat7g155280.1	AT3G13960.1	| Symbols: AtGRF5, GRF5 | growth-regulating factor 5 | chr3:4608526-4610160 FORWARD LENGTH=397	1e-41
chr4LG4_62462066_62462189	mir396	Psat2g141480.2	AT3G13960.1	| Symbols: AtGRF5, GRF5 | growth-regulating factor 5 | chr3:4608526-4610160 FORWARD LENGTH=397	2e-39
chr4LG4_62462066_62462189	mir396	Psat4g016760.3	AT2G06200.1	| Symbols: AtGRF6, GRF6 | growth-regulating factor 6 | chr2:2426340-2427255 FORWARD LENGTH=244	2e-26
chr4LG4_62462066_62462189	mir396	Psat2g141480.1	AT3G13960.1	| Symbols: AtGRF5, GRF5 | growth-regulating factor 5 | chr3:4608526-4610160 FORWARD LENGTH=397	2e-39
chr4LG4_62462066_62462189	mir396	Psat1g133440.1	AT3G13960.1	| Symbols: AtGRF5, GRF5 | growth-regulating factor 5 | chr3:4608526-4610160 FORWARD LENGTH=397	7e-55
chr4LG4_62462066_62462189	mir396	Psat4g182160.1	AT3G13960.1	| Symbols: AtGRF5, GRF5 | growth-regulating factor 5 | chr3:4608526-4610160 FORWARD LENGTH=397	1e-64
chr4LG4_62462066_62462189	mir396	Psat4g182160.2	AT3G13960.1	| Symbols: AtGRF5, GRF5 | growth-regulating factor 5 | chr3:4608526-4610160 FORWARD LENGTH=397	3e-64
chr4LG4_62462066_62462189	mir396	Psat3g034600.1	AT3G52910.1	| Symbols: AtGRF4, GRF4 | growth-regulating factor 4 | chr3:19616177-19618268 REVERSE LENGTH=380	2e-96
chr4LG4_62462066_62462189	mir396	Psat4g016760.2	AT3G13960.1	| Symbols: AtGRF5, GRF5 | growth-regulating factor 5 | chr3:4608526-4610160 FORWARD LENGTH=397	5e-52
chr4LG4_62462066_62462189	mir396	Psat4g016760.1	AT3G13960.1	| Symbols: AtGRF5, GRF5 | growth-regulating factor 5 | chr3:4608526-4610160 FORWARD LENGTH=397	5e-52
chr4LG4_62462066_62462189	mir396	Psat5g073400.1	AT4G37740.1	| Symbols: AtGRF2, GRF2 | growth-regulating factor 2 | chr4:17725533-17727609 REVERSE LENGTH=535	1e-29
chr4LG4_62462066_62462189	mir396	Psat7g125880.1	AT4G34131.1	| Symbols: UGT73B3 | UDP-glucosyl transferase 73B3 | chr4:16343268-16344713 REVERSE LENGTH=481	3e-154
chr4LG4_62462066_62462189	mir396	Psat7g177840.1	AT5G23210.1	| Symbols: SCPL34 | serine carboxypeptidase-like 34 | chr5:7810892-7814837 FORWARD LENGTH=499	0
chr4LG4_62462066_62462189	mir396	Psat3g121680.2	AT3G53580.1	| Symbols: | diaminopimelate epimerase family protein | chr3:19864784-19866907 FORWARD LENGTH=362	5e-160
chr4LG4_62462066_62462189	mir396	Psat3g121680.1	AT3G53580.1	| Symbols: | diaminopimelate epimerase family protein | chr3:19864784-19866907 FORWARD LENGTH=362	0
chr4LG4_62462066_62462189	mir396	Psat0s1966g0120.2	AT2G45480.1	| Symbols: AtGRF9, GRF9 | growth-regulating factor 9 | chr2:18745583-18747403 FORWARD LENGTH=429	6e-33
chr4LG4_62462066_62462189	mir396	Psat0s1966g0120.1	AT2G45480.1	| Symbols: AtGRF9, GRF9 | growth-regulating factor 9 | chr2:18745583-18747403 FORWARD LENGTH=429	7e-33
chr4LG4_62462066_62462189	mir396	Psat6g017120.1	AT2G22840.1	| Symbols: AtGRF1, GRF1 | growth-regulating factor 1 | chr2:9728841-9731141 FORWARD LENGTH=530	1e-93
chr4LG4_62462066_62462189	mir396	Psat4g037480.1	No hits found
chr4LG4_62462066_62462189	mir396	Psat4g089520.1	AT3G50430.1	| Symbols: | unknown protein; Has 54 Blast hits to 54 proteins in 22 species: Archae - 0; Bacteria - 0; Metazoa- 29; Fungi - 0; Plants - 24; Viruses - 0; Other Eukaryotes- 1 (source: NCBI BLink). | chr3:18713718-18716759 FORWARD LENGTH=642	8e-123
chr4LG4_62462066_62462189	mir396	Psat7g125000.1	AT2G15680.1	| Symbols: | Calcium-binding EF-hand family protein | chr2:6831024-6831587 FORWARD LENGTH=187	3e-76
chr4LG4_62462066_62462189	mir396	Psat5g219080.1	AT3G14460.1	| Symbols: | LRR and NB-ARC domains-containing disease resistance protein | chr3:4851990-4856264 REVERSE LENGTH=1424	2e-115
chr4LG4_62462066_62462189	mir396	Psat5g243600.1	No hits found
chr4LG4_62462066_62462189	mir396	Psat6g158920.1	AT4G01800.1	| Symbols: AGY1, AtcpSecA, SECA1 | Albino or Glassy Yellow 1 | chr4:770926-776131 REVERSE LENGTH=1022	0
chr4LG4_192576712_192576835	mir171_1	Psat5g001960.1	AT5G06120.2	| Symbols: | ARM repeat superfamily protein | chr5:1845309-1852601 FORWARD LENGTH=1052	0
chr4LG4_192576712_192576835	mir171_1	Psat0s7112g0040.1	No hits found
chr4LG4_192576712_192576835	mir171_1	Psat3g093400.4	AT3G26720.1	| Symbols: | Glycosyl hydrolase family 38 protein | chr3:9816707-9823056 FORWARD LENGTH=1019	0
chr4LG4_192576712_192576835	mir171_1	Psat3g093400.2	AT3G26720.1	| Symbols: | Glycosyl hydrolase family 38 protein | chr3:9816707-9823056 FORWARD LENGTH=1019	0
chr4LG4_192576712_192576835	mir171_1	Psat3g093400.3	AT3G26720.1	| Symbols: | Glycosyl hydrolase family 38 protein | chr3:9816707-9823056 FORWARD LENGTH=1019	0
chr4LG4_192576712_192576835	mir171_1	Psat3g093400.1	AT3G26720.1	| Symbols: | Glycosyl hydrolase family 38 protein | chr3:9816707-9823056 FORWARD LENGTH=1019	0
chr4LG4_232025198_232025331	mir5139-m	Psat6g187040.1	No hits found
chr4LG4_232025198_232025331	mir5139-m	Psat4g047080.1	No hits found
chr4LG4_416993332_416993727		Psat1g014800.4	AT3G07930.3	| Symbols: | DNA glycosylase superfamily protein | chr3:2526720-2528416 FORWARD LENGTH=445	1e-69
chr4LG4_416993332_416993727		Psat1g014800.2	AT3G07930.2	| Symbols: | DNA glycosylase superfamily protein | chr3:2526720-2528145 FORWARD LENGTH=358	3e-20
chr4LG4_416993332_416993727		Psat1g014800.5	AT3G07930.2	| Symbols: | DNA glycosylase superfamily protein | chr3:2526720-2528145 FORWARD LENGTH=358	3e-20
chr4LG4_416993332_416993727		Psat1g014800.3	AT3G07930.2	| Symbols: | DNA glycosylase superfamily protein | chr3:2526720-2528145 FORWARD LENGTH=358	1e-19
chr4LG4_416993332_416993727		Psat1g014800.1	AT3G07930.2	| Symbols: | DNA glycosylase superfamily protein | chr3:2526720-2528145 FORWARD LENGTH=358	1e-19
chr4LG4_416993332_416993727		Psat1g014800.2	AT3G07930.2	| Symbols: | DNA glycosylase superfamily protein | chr3:2526720-2528145 FORWARD LENGTH=358	3e-20
chr4LG4_416993332_416993727		Psat1g014800.5	AT3G07930.2	| Symbols: | DNA glycosylase superfamily protein | chr3:2526720-2528145 FORWARD LENGTH=358	3e-20
chr4LG4_416993332_416993727		Psat1g014800.1	AT3G07930.2	| Symbols: | DNA glycosylase superfamily protein | chr3:2526720-2528145 FORWARD LENGTH=358	1e-19
chr4LG4_416993332_416993727		Psat1g014800.3	AT3G07930.2	| Symbols: | DNA glycosylase superfamily protein | chr3:2526720-2528145 FORWARD LENGTH=358	1e-19
chr4LG4_416993332_416993727		Psat1g014800.4	AT3G07930.3	| Symbols: | DNA glycosylase superfamily protein | chr3:2526720-2528416 FORWARD LENGTH=445	1e-69
chr4LG4_430544529_430544925		Psat4g215560.1	No hits found
chr4LG4_430544529_430544925		Psat6g042240.1	AT1G44800.1	| Symbols: | nodulin MtN21 /EamA-like transporter family protein | chr1:16914342-16916858 REVERSE LENGTH=370	4e-169
chr4LG4_435065170_435065297	mir166	Psat4g221480.1	AT1G52150.1	| Symbols: ATHB-15, ATHB15, CNA, ICU4 | Homeobox-leucine zipper family protein / lipid-binding START domain-containing protein | chr1:19409913-19413961 REVERSE LENGTH=836	0
chr4LG4_435065170_435065297	mir166	Psat5g297000.1	AT1G52150.1	| Symbols: ATHB-15, ATHB15, CNA, ICU4 | Homeobox-leucine zipper family protein / lipid-binding START domain-containing protein | chr1:19409913-19413961 REVERSE LENGTH=836	0
chr4LG4_435065170_435065297	mir166	Psat4g221480.2	AT1G52150.3	| Symbols: ATHB-15, ATHB15, CNA, ICU4 | Homeobox-leucine zipper family protein / lipid-binding START domain-containing protein | chr1:19410118-19413961 REVERSE LENGTH=794	0
chr4LG4_435065170_435065297	mir166	Psat1g167760.1	AT2G34710.1	| Symbols: PHB, ATHB14, ATHB-14, PHB-1D | Homeobox-leucine zipper family protein / lipid-binding START domain-containing protein | chr2:14639548-14643993 REVERSE LENGTH=852	0
chr4LG4_435065170_435065297	mir166	Psat7g225360.1	AT5G60690.1	| Symbols: REV, IFL, IFL1 | Homeobox-leucine zipper family protein / lipid-binding START domain-containing protein| chr5:24397734-24401933 FORWARD LENGTH=842	0
chr4LG4_435065170_435065297	mir166	Psat1g167760.2	AT2G34710.1	| Symbols: PHB, ATHB14, ATHB-14, PHB-1D | Homeobox-leucine zipper family protein / lipid-binding START domain-containing protein | chr2:14639548-14643993 REVERSE LENGTH=852	0
chr4LG4_435065170_435065297	mir166	Psat5g279960.1	AT5G60690.1	| Symbols: REV, IFL, IFL1 | Homeobox-leucine zipper family protein / lipid-binding START domain-containing protein| chr5:24397734-24401933 FORWARD LENGTH=842	0
chr4LG4_435065170_435065297	mir166	Psat5g020800.1	AT4G32880.1	| Symbols: ATHB-8, ATHB8, HB-8 | homeobox gene 8 | chr4:15863587-15867822 REVERSE LENGTH=833	0
chr4LG4_435065170_435065297	mir166	Psat2g173760.1	AT3G57990.1	| Symbols: | unknown protein; Has 1497 Blast hits to 1323 proteins in 52 species: Archae - 0; Bacteria - 4;Metazoa - 23; Fungi - 34; Plants - 61; Viruses - 0; Other Eukaryotes- 1375 (source: NCBI BLink). | chr3:21470244-21471347 REVERSE LENGTH=367	9e-31
chr4LG4_435065170_435065297	mir166	Psat1g131440.1	No hits found
chr5LG3_50662476_50662611		Psat7g014120.1	AT4G13360.1	| Symbols: | ATP-dependent caseinolytic (Clp) protease/crotonase family protein | chr4:7775133-7777701 FORWARD LENGTH=421	0
chr5LG3_61818177_61818267	mir156	Psat6g101960.1	AT2G42200.1	| Symbols: SPL9, AtSPL9 | squamosa promoter binding protein-like 9 | chr2:17587601-17589451 FORWARD LENGTH=375	2e-54
chr5LG3_61818177_61818267	mir156	Psat3g069560.1	AT2G42200.1	| Symbols: SPL9, AtSPL9 | squamosa promoter binding protein-like 9 | chr2:17587601-17589451 FORWARD LENGTH=375	5e-65
chr5LG3_61818177_61818267	mir156	Psat5g096720.2	AT5G43270.1	| Symbols: SPL2 | squamosa promoter binding protein-like 2 | chr5:17360527-17362143 REVERSE LENGTH=419	3e-59
chr5LG3_61818177_61818267	mir156	Psat5g096720.3	AT5G43270.1	| Symbols: SPL2 | squamosa promoter binding protein-like 2 | chr5:17360527-17362143 REVERSE LENGTH=419	3e-59
chr5LG3_61818177_61818267	mir156	Psat5g096720.1	AT5G43270.1	| Symbols: SPL2 | squamosa promoter binding protein-like 2 | chr5:17360527-17362143 REVERSE LENGTH=419	3e-59
chr5LG3_61818177_61818267	mir156	Psat7g077080.3	AT5G43270.1	| Symbols: SPL2 | squamosa promoter binding protein-like 2 | chr5:17360527-17362143 REVERSE LENGTH=419	7e-54
chr5LG3_61818177_61818267	mir156	Psat7g077080.1	AT5G43270.1	| Symbols: SPL2 | squamosa promoter binding protein-like 2 | chr5:17360527-17362143 REVERSE LENGTH=419	7e-54
chr5LG3_61818177_61818267	mir156	Psat7g077080.2	AT5G43270.1	| Symbols: SPL2 | squamosa promoter binding protein-like 2 | chr5:17360527-17362143 REVERSE LENGTH=419	7e-54
chr5LG3_61818177_61818267	mir156	Psat5g096720.4	AT5G43270.1	| Symbols: SPL2 | squamosa promoter binding protein-like 2 | chr5:17360527-17362143 REVERSE LENGTH=419	7e-57
chr5LG3_61818177_61818267	mir156	Psat2g077800.2	No hits found
chr5LG3_61818177_61818267	mir156	Psat2g077800.3	No hits found
chr5LG3_61818177_61818267	mir156	Psat2g077800.1	No hits found
chr5LG3_61818177_61818267	mir156	Psat3g157680.1	AT1G27360.4	| Symbols: SPL11 | squamosa promoter-like 11 | chr1:9502139-9503715 FORWARD LENGTH=393	7e-38
chr5LG3_61818177_61818267	mir156	Psat5g052160.1	AT5G50570.2	| Symbols: SPL13A, SPL13 | Squamosa promoter-binding protein-like (SBP domain) transcription factor family protein| chr5:20582555-20583791 REVERSE LENGTH=359	1e-67
chr5LG3_61818177_61818267	mir156	Psat1g127000.2	AT1G69170.1	| Symbols: | Squamosa promoter-binding protein-like (SBP domain) transcription factor family protein | chr1:26005626-26007041 FORWARD LENGTH=405	9e-48
chr5LG3_61818177_61818267	mir156	Psat1g127000.1	AT1G69170.1	| Symbols: | Squamosa promoter-binding protein-like (SBP domain) transcription factor family protein | chr1:26005626-26007041 FORWARD LENGTH=405	9e-48
chr5LG3_61818177_61818267	mir156	Psat4g046440.2	AT1G69170.1	| Symbols: | Squamosa promoter-binding protein-like (SBP domain) transcription factor family protein | chr1:26005626-26007041 FORWARD LENGTH=405	4e-48
chr5LG3_61818177_61818267	mir156	Psat4g046440.1	AT1G69170.1	| Symbols: | Squamosa promoter-binding protein-like (SBP domain) transcription factor family protein | chr1:26005626-26007041 FORWARD LENGTH=405	4e-48
chr5LG3_61818177_61818267	mir156	Psat2g133080.1	AT1G69170.1	| Symbols: | Squamosa promoter-binding protein-like (SBP domain) transcription factor family protein | chr1:26005626-26007041 FORWARD LENGTH=405	4e-61
chr5LG3_61818177_61818267	mir156	Psat5g040520.1	AT4G00340.1	| Symbols: RLK4 | receptor-like protein kinase 4 | chr4:148958-151496 FORWARD LENGTH=818	2e-97
chr5LG3_61818177_61818267	mir156	Psat3g164360.2	AT5G50570.2	| Symbols: SPL13A, SPL13 | Squamosa promoter-binding protein-like (SBP domain) transcription factor family protein| chr5:20582555-20583791 REVERSE LENGTH=359	4e-43
chr5LG3_61818177_61818267	mir156	Psat3g164360.1	AT5G50570.2	| Symbols: SPL13A, SPL13 | Squamosa promoter-binding protein-like (SBP domain) transcription factor family protein| chr5:20582555-20583791 REVERSE LENGTH=359	4e-43
chr5LG3_61818177_61818267	mir156	Psat6g124520.4	AT5G46050.1	| Symbols: ATPTR3, PTR3 | peptide transporter 3 | chr5:18675062-18679071 REVERSE LENGTH=582	0
chr5LG3_61818177_61818267	mir156	Psat6g124520.2	AT5G46050.1	| Symbols: ATPTR3, PTR3 | peptide transporter 3 | chr5:18675062-18679071 REVERSE LENGTH=582	0
chr5LG3_61818177_61818267	mir156	Psat6g124520.3	AT5G46050.1	| Symbols: ATPTR3, PTR3 | peptide transporter 3 | chr5:18675062-18679071 REVERSE LENGTH=582	0
chr5LG3_61818177_61818267	mir156	Psat6g124520.1	AT5G46050.1	| Symbols: ATPTR3, PTR3 | peptide transporter 3 | chr5:18675062-18679071 REVERSE LENGTH=582	0
chr5LG3_61818177_61818267	mir156	Psat2g015200.1	AT1G50840.1	| Symbols: POLGAMMA2 | polymerase gamma 2 | chr1:18839277-18844313 FORWARD LENGTH=1050	0
chr5LG3_61818177_61818267	mir156	Psat5g094840.1	No hits found
chr5LG3_61818177_61818267	mir156	Psat3g194440.1	AT3G29290.1	| Symbols: emb2076 | Pentatricopeptide repeat (PPR) superfamily protein | chr3:11238421-11240125 FORWARD LENGTH=540	2e-153
chr5LG3_61818177_61818267	mir156	Psat2g146880.1	AT5G65930.2	| Symbols: ZWI, PKCBP, KCBP | kinesin-like calmodulin-binding protein (ZWICHEL) | chr5:26370369-26376394 REVERSE LENGTH=1260	0
chr5LG3_61818177_61818267	mir156	Psat2g146880.2	AT5G65930.2	| Symbols: ZWI, PKCBP, KCBP | kinesin-like calmodulin-binding protein (ZWICHEL) | chr5:26370369-26376394 REVERSE LENGTH=1260	0
chr5LG3_61818177_61818267	mir156	Psat2g146880.3	AT5G65930.2	| Symbols: ZWI, PKCBP, KCBP | kinesin-like calmodulin-binding protein (ZWICHEL) | chr5:26370369-26376394 REVERSE LENGTH=1260	0
chr5LG3_61818177_61818267	mir156	Psat3g125960.1	AT3G08960.1	| Symbols: | ARM repeat superfamily protein | chr3:2730405-2736762 REVERSE LENGTH=1010	0
chr5LG3_61818177_61818267	mir156	Psat1g146960.2	AT4G25910.1	| Symbols: NFU3, ATCNFU3 | NFU domain protein 3 | chr4:13164128-13165094 FORWARD LENGTH=236	1e-53
chr5LG3_61818177_61818267	mir156	Psat1g146960.1	AT4G25910.1	| Symbols: NFU3, ATCNFU3 | NFU domain protein 3 | chr4:13164128-13165094 FORWARD LENGTH=236	9e-93
chr5LG3_61818177_61818267	mir156	Psat6g033960.2	AT5G25610.1	| Symbols: RD22, ATRD22 | BURP domain-containing protein | chr5:8914498-8916684 REVERSE LENGTH=392	1e-109
chr5LG3_61818177_61818267	mir156	Psat6g033960.1	AT5G25610.1	| Symbols: RD22, ATRD22 | BURP domain-containing protein | chr5:8914498-8916684 REVERSE LENGTH=392	5e-119
chr5LG3_61818177_61818267	mir156	Psat2g171720.1	AT4G37670.2	| Symbols: NAGS2 | N-acetyl-l-glutamate synthase 2 | chr4:17696179-17698836 REVERSE LENGTH=613	0
chr5LG3_61818177_61818267	mir156	Psat5g196400.1	AT5G17230.2	| Symbols: PSY | PHYTOENE SYNTHASE | chr5:5659839-5662087 REVERSE LENGTH=422	0
chr5LG3_61818177_61818267	mir156	Psat5g196400.3	AT5G17230.2	| Symbols: PSY | PHYTOENE SYNTHASE | chr5:5659839-5662087 REVERSE LENGTH=422	1e-65
chr5LG3_61818177_61818267	mir156	Psat5g196400.2	AT5G17230.2	| Symbols: PSY | PHYTOENE SYNTHASE | chr5:5659839-5662087 REVERSE LENGTH=422	1e-122
chr5LG3_61818177_61818267	mir156	Psat2g059400.1	AT5G17910.2	| Symbols: | unknown protein; FUNCTIONS IN: molecular_function unknown; INVOLVED IN: biological_process unknown;LOCATED IN: mitochondrion; EXPRESSED IN: 23 plant structures;EXPRESSED DURING: 15 growth stages; BEST Arabidopsis thaliana protein match is: unknown protein (TAIR:AT2G29620.1).| chr5:5927906-5932292 FORWARD LENGTH=1342	7e-27
chr5LG3_106621256_106621376	mir166	Psat5g297000.1	AT1G52150.1	| Symbols: ATHB-15, ATHB15, CNA, ICU4 | Homeobox-leucine zipper family protein / lipid-binding START domain-containing protein | chr1:19409913-19413961 REVERSE LENGTH=836	0
chr5LG3_106621256_106621376	mir166	Psat6g110720.1	No hits found
chr5LG3_106621256_106621376	mir166	Psat4g221480.1	AT1G52150.1	| Symbols: ATHB-15, ATHB15, CNA, ICU4 | Homeobox-leucine zipper family protein / lipid-binding START domain-containing protein | chr1:19409913-19413961 REVERSE LENGTH=836	0
chr5LG3_106621256_106621376	mir166	Psat4g221480.2	AT1G52150.3	| Symbols: ATHB-15, ATHB15, CNA, ICU4 | Homeobox-leucine zipper family protein / lipid-binding START domain-containing protein | chr1:19410118-19413961 REVERSE LENGTH=794	0
chr5LG3_106621256_106621376	mir166	Psat7g081800.1	AT1G30100.1	| Symbols: NCED5, ATNCED5 | nine-cis-epoxycarotenoid dioxygenase 5 | chr1:10571383-10573152 FORWARD LENGTH=589	0
chr5LG3_106621422_106621561	mir166	Psat4g221480.1	AT1G52150.1	| Symbols: ATHB-15, ATHB15, CNA, ICU4 | Homeobox-leucine zipper family protein / lipid-binding START domain-containing protein | chr1:19409913-19413961 REVERSE LENGTH=836	0
chr5LG3_106621422_106621561	mir166	Psat5g297000.1	AT1G52150.1	| Symbols: ATHB-15, ATHB15, CNA, ICU4 | Homeobox-leucine zipper family protein / lipid-binding START domain-containing protein | chr1:19409913-19413961 REVERSE LENGTH=836	0
chr5LG3_106621422_106621561	mir166	Psat4g221480.2	AT1G52150.3	| Symbols: ATHB-15, ATHB15, CNA, ICU4 | Homeobox-leucine zipper family protein / lipid-binding START domain-containing protein | chr1:19410118-19413961 REVERSE LENGTH=794	0
chr5LG3_106621422_106621561	mir166	Psat1g167760.1	AT2G34710.1	| Symbols: PHB, ATHB14, ATHB-14, PHB-1D | Homeobox-leucine zipper family protein / lipid-binding START domain-containing protein | chr2:14639548-14643993 REVERSE LENGTH=852	0
chr5LG3_106621422_106621561	mir166	Psat7g225360.1	AT5G60690.1	| Symbols: REV, IFL, IFL1 | Homeobox-leucine zipper family protein / lipid-binding START domain-containing protein| chr5:24397734-24401933 FORWARD LENGTH=842	0
chr5LG3_106621422_106621561	mir166	Psat1g167760.2	AT2G34710.1	| Symbols: PHB, ATHB14, ATHB-14, PHB-1D | Homeobox-leucine zipper family protein / lipid-binding START domain-containing protein | chr2:14639548-14643993 REVERSE LENGTH=852	0
chr5LG3_106621422_106621561	mir166	Psat5g279960.1	AT5G60690.1	| Symbols: REV, IFL, IFL1 | Homeobox-leucine zipper family protein / lipid-binding START domain-containing protein| chr5:24397734-24401933 FORWARD LENGTH=842	0
chr5LG3_106621422_106621561	mir166	Psat5g020800.1	AT4G32880.1	| Symbols: ATHB-8, ATHB8, HB-8 | homeobox gene 8 | chr4:15863587-15867822 REVERSE LENGTH=833	0
chr5LG3_106621422_106621561	mir166	Psat2g173760.1	AT3G57990.1	| Symbols: | unknown protein; Has 1497 Blast hits to 1323 proteins in 52 species: Archae - 0; Bacteria - 4;Metazoa - 23; Fungi - 34; Plants - 61; Viruses - 0; Other Eukaryotes- 1375 (source: NCBI BLink). | chr3:21470244-21471347 REVERSE LENGTH=367	9e-31
chr5LG3_106621422_106621561	mir166	Psat1g131440.1	No hits found
chr5LG3_127478823_127478921	mir159	Psat5g118600.1	AT1G07480.2	| Symbols: | Transcription factor IIA, alpha/beta subunit | chr1:2296706-2299215 REVERSE LENGTH=375	8e-66
chr5LG3_127478823_127478921	mir159	Psat1g200600.1	No hits found
chr5LG3_127478823_127478921	mir159	Psat5g240240.1	AT3G15030.3	| Symbols: TCP4 | TCP family transcription factor 4 | chr3:5062308-5063570 FORWARD LENGTH=420	3e-71
chr5LG3_127478823_127478921	mir159	Psat4g170920.1	AT1G53230.1	| Symbols: TCP3 | TEOSINTE BRANCHED 1, cycloidea and PCF transcription factor 3 | chr1:19850260-19851435 REVERSE LENGTH=391	2e-97
chr5LG3_134064950_134065097	mir166	Psat4g221480.1	AT1G52150.1	| Symbols: ATHB-15, ATHB15, CNA, ICU4 | Homeobox-leucine zipper family protein / lipid-binding START domain-containing protein | chr1:19409913-19413961 REVERSE LENGTH=836	0
chr5LG3_134064950_134065097	mir166	Psat5g297000.1	AT1G52150.1	| Symbols: ATHB-15, ATHB15, CNA, ICU4 | Homeobox-leucine zipper family protein / lipid-binding START domain-containing protein | chr1:19409913-19413961 REVERSE LENGTH=836	0
chr5LG3_134064950_134065097	mir166	Psat4g221480.2	AT1G52150.3	| Symbols: ATHB-15, ATHB15, CNA, ICU4 | Homeobox-leucine zipper family protein / lipid-binding START domain-containing protein | chr1:19410118-19413961 REVERSE LENGTH=794	0
chr5LG3_134064950_134065097	mir166	Psat1g167760.1	AT2G34710.1	| Symbols: PHB, ATHB14, ATHB-14, PHB-1D | Homeobox-leucine zipper family protein / lipid-binding START domain-containing protein | chr2:14639548-14643993 REVERSE LENGTH=852	0
chr5LG3_134064950_134065097	mir166	Psat7g225360.1	AT5G60690.1	| Symbols: REV, IFL, IFL1 | Homeobox-leucine zipper family protein / lipid-binding START domain-containing protein| chr5:24397734-24401933 FORWARD LENGTH=842	0
chr5LG3_134064950_134065097	mir166	Psat1g167760.2	AT2G34710.1	| Symbols: PHB, ATHB14, ATHB-14, PHB-1D | Homeobox-leucine zipper family protein / lipid-binding START domain-containing protein | chr2:14639548-14643993 REVERSE LENGTH=852	0
chr5LG3_134064950_134065097	mir166	Psat5g279960.1	AT5G60690.1	| Symbols: REV, IFL, IFL1 | Homeobox-leucine zipper family protein / lipid-binding START domain-containing protein| chr5:24397734-24401933 FORWARD LENGTH=842	0
chr5LG3_134064950_134065097	mir166	Psat5g020800.1	AT4G32880.1	| Symbols: ATHB-8, ATHB8, HB-8 | homeobox gene 8 | chr4:15863587-15867822 REVERSE LENGTH=833	0
chr5LG3_134064950_134065097	mir166	Psat2g173760.1	AT3G57990.1	| Symbols: | unknown protein; Has 1497 Blast hits to 1323 proteins in 52 species: Archae - 0; Bacteria - 4;Metazoa - 23; Fungi - 34; Plants - 61; Viruses - 0; Other Eukaryotes- 1375 (source: NCBI BLink). | chr3:21470244-21471347 REVERSE LENGTH=367	9e-31
chr5LG3_134064950_134065097	mir166	Psat1g131440.1	No hits found
chr5LG3_264860902_264861103	mir159	Psat1g188440.1	AT4G18390.2	| Symbols: TCP2 | TEOSINTE BRANCHED 1, cycloidea and PCF transcription factor 2 | chr4:10163212-10164309 REVERSE LENGTH=365	4e-46
chr5LG3_264860902_264861103	mir159	Psat0s1198g0040.2	AT4G18390.2	| Symbols: TCP2 | TEOSINTE BRANCHED 1, cycloidea and PCF transcription factor 2 | chr4:10163212-10164309 REVERSE LENGTH=365	1e-71
chr5LG3_264860902_264861103	mir159	Psat0s1198g0040.1	AT4G18390.2	| Symbols: TCP2 | TEOSINTE BRANCHED 1, cycloidea and PCF transcription factor 2 | chr4:10163212-10164309 REVERSE LENGTH=365	1e-71
chr5LG3_264860902_264861103	mir159	Psat0s1198g0040.3	AT4G18390.2	| Symbols: TCP2 | TEOSINTE BRANCHED 1, cycloidea and PCF transcription factor 2 | chr4:10163212-10164309 REVERSE LENGTH=365	1e-71
chr5LG3_264860902_264861103	mir159	Psat1g200600.1	No hits found
chr5LG3_264860902_264861103	mir159	Psat5g274920.1	AT3G15030.3	| Symbols: TCP4 | TCP family transcription factor 4 | chr3:5062308-5063570 FORWARD LENGTH=420	2e-49
chr5LG3_264860902_264861103	mir159	Psat5g240240.1	AT3G15030.3	| Symbols: TCP4 | TCP family transcription factor 4 | chr3:5062308-5063570 FORWARD LENGTH=420	3e-71
chr5LG3_264860902_264861103	mir159	Psat4g170920.1	AT1G53230.1	| Symbols: TCP3 | TEOSINTE BRANCHED 1, cycloidea and PCF transcription factor 3 | chr1:19850260-19851435 REVERSE LENGTH=391	2e-97
chr5LG3_264860902_264861103	mir159	Psat5g225360.3	AT5G06100.1	| Symbols: MYB33, ATMYB33 | myb domain protein 33 | chr5:1838555-1839997 FORWARD LENGTH=451	2e-93
chr5LG3_264860902_264861103	mir159	Psat4g188880.1	AT3G11440.1	| Symbols: ATMYB65, MYB65 | myb domain protein 65 | chr3:3603056-3604929 FORWARD LENGTH=553	2e-101
chr5LG3_264860902_264861103	mir159	Psat5g225360.1	AT3G11440.1	| Symbols: ATMYB65, MYB65 | myb domain protein 65 | chr3:3603056-3604929 FORWARD LENGTH=553	3e-101
chr5LG3_264860902_264861103	mir159	Psat5g225360.2	AT3G11440.1	| Symbols: ATMYB65, MYB65 | myb domain protein 65 | chr3:3603056-3604929 FORWARD LENGTH=553	3e-101
chr5LG3_264860902_264861103	mir159	Psat4g215160.1	AT3G61850.4	| Symbols: DAG1 | Dof-type zinc finger DNA-binding family protein | chr3:22895495-22897150 FORWARD LENGTH=324	4e-28
chr5LG3_278324568_278324675	mir390	Psat3g142120.1	AT5G48940.1	| Symbols: | Leucine-rich repeat transmembrane protein kinase family protein | chr5:19839785-19843744 FORWARD LENGTH=1135	0
chr5LG3_518540971_518541144	mir171_1-m	Psat3g163480.1	AT4G00150.1	| Symbols: HAM3, ATHAM3, LOM3 | GRAS family transcription factor | chr4:57429-59105 REVERSE LENGTH=558	5e-140
chr5LG3_518540971_518541144	mir171_1-m	Psat7g236360.1	AT4G00150.1	| Symbols: HAM3, ATHAM3, LOM3 | GRAS family transcription factor | chr4:57429-59105 REVERSE LENGTH=558	2e-125
chr5LG3_518540971_518541144	mir171_1-m	Psat4g195200.1	AT4G00220.1	| Symbols: LBD30, JLO | Lateral organ boundaries (LOB) domain family protein | chr4:90147-92087 FORWARD LENGTH=228	6e-73
chr6LG2_1007572_1007801	mir394	Psat5g096960.1	AT1G27340.1	| Symbols: | Galactose oxidase/kelch repeat superfamily protein | chr1:9495741-9497857 FORWARD LENGTH=467	0
chr6LG2_1007572_1007801	mir394	Psat7g135960.1	AT5G39660.2	| Symbols: CDF2 | cycling DOF factor 2 | chr5:15878920-15880712 FORWARD LENGTH=457	1e-84
chr6LG2_1007572_1007801	mir394	Psat7g135960.3	AT5G39660.2	| Symbols: CDF2 | cycling DOF factor 2 | chr5:15878920-15880712 FORWARD LENGTH=457	5e-80
chr6LG2_1007572_1007801	mir394	Psat7g135960.2	AT3G47500.1	| Symbols: CDF3 | cycling DOF factor 3 | chr3:17504276-17505964 REVERSE LENGTH=448	5e-67
chr6LG2_1007572_1007801	mir394	Psat2g175480.1	AT4G17620.1	| Symbols: | glycine-rich protein | chr4:9822005-9824859 FORWARD LENGTH=544	0
chr6LG2_1007572_1007801	mir394	Psat7g097440.1	AT5G64550.1	| Symbols: | loricrin-related | chr5:25801794-25803698 REVERSE LENGTH=634	0
chr6LG2_1007572_1007801	mir394	Psat4g004200.1	AT1G62330.1	| Symbols: | O-fucosyltransferase family protein | chr1:23046965-23050053 FORWARD LENGTH=652	0
chr6LG2_1007572_1007801	mir394	Psat5g121480.1	AT4G05460.1	| Symbols: | RNI-like superfamily protein | chr4:2761106-2762400 REVERSE LENGTH=302	2e-61
chr6LG2_1007572_1007801	mir394	Psat1g197760.2	AT3G58670.3	| Symbols: | Protein of unknown function (DUF1637) | chr3:21703693-21705314 REVERSE LENGTH=242	1e-93
chr6LG2_1007572_1007801	mir394	Psat1g197760.1	AT3G58670.3	| Symbols: | Protein of unknown function (DUF1637) | chr3:21703693-21705314 REVERSE LENGTH=242	1e-93
chr6LG2_1007572_1007801	mir394	Psat7g193080.1	AT4G15180.1	| Symbols: SDG2, ATXR3 | SET domain protein 2 | chr4:8651999-8662178 FORWARD LENGTH=2335	0
chr6LG2_1007572_1007801	mir394	Psat7g193080.2	AT4G15180.1	| Symbols: SDG2, ATXR3 | SET domain protein 2 | chr4:8651999-8662178 FORWARD LENGTH=2335	0
chr6LG2_19401898_19401979	mir156	Psat2g133080.1	AT1G69170.1	| Symbols: | Squamosa promoter-binding protein-like (SBP domain) transcription factor family protein | chr1:26005626-26007041 FORWARD LENGTH=405	4e-61
chr6LG2_19401898_19401979	mir156	Psat4g046440.1	AT1G69170.1	| Symbols: | Squamosa promoter-binding protein-like (SBP domain) transcription factor family protein | chr1:26005626-26007041 FORWARD LENGTH=405	4e-48
chr6LG2_19401898_19401979	mir156	Psat4g046440.2	AT1G69170.1	| Symbols: | Squamosa promoter-binding protein-like (SBP domain) transcription factor family protein | chr1:26005626-26007041 FORWARD LENGTH=405	4e-48
chr6LG2_19401898_19401979	mir156	Psat5g096720.4	AT5G43270.1	| Symbols: SPL2 | squamosa promoter binding protein-like 2 | chr5:17360527-17362143 REVERSE LENGTH=419	7e-57
chr6LG2_19401898_19401979	mir156	Psat7g077080.3	AT5G43270.1	| Symbols: SPL2 | squamosa promoter binding protein-like 2 | chr5:17360527-17362143 REVERSE LENGTH=419	7e-54
chr6LG2_19401898_19401979	mir156	Psat7g077080.2	AT5G43270.1	| Symbols: SPL2 | squamosa promoter binding protein-like 2 | chr5:17360527-17362143 REVERSE LENGTH=419	7e-54
chr6LG2_19401898_19401979	mir156	Psat7g077080.1	AT5G43270.1	| Symbols: SPL2 | squamosa promoter binding protein-like 2 | chr5:17360527-17362143 REVERSE LENGTH=419	7e-54
chr6LG2_19401898_19401979	mir156	Psat5g096720.2	AT5G43270.1	| Symbols: SPL2 | squamosa promoter binding protein-like 2 | chr5:17360527-17362143 REVERSE LENGTH=419	3e-59
chr6LG2_19401898_19401979	mir156	Psat5g096720.1	AT5G43270.1	| Symbols: SPL2 | squamosa promoter binding protein-like 2 | chr5:17360527-17362143 REVERSE LENGTH=419	3e-59
chr6LG2_19401898_19401979	mir156	Psat5g096720.3	AT5G43270.1	| Symbols: SPL2 | squamosa promoter binding protein-like 2 | chr5:17360527-17362143 REVERSE LENGTH=419	3e-59
chr6LG2_19401898_19401979	mir156	Psat1g127000.2	AT1G69170.1	| Symbols: | Squamosa promoter-binding protein-like (SBP domain) transcription factor family protein | chr1:26005626-26007041 FORWARD LENGTH=405	9e-48
chr6LG2_19401898_19401979	mir156	Psat1g127000.1	AT1G69170.1	| Symbols: | Squamosa promoter-binding protein-like (SBP domain) transcription factor family protein | chr1:26005626-26007041 FORWARD LENGTH=405	9e-48
chr6LG2_19401898_19401979	mir156	Psat5g052160.1	AT5G50570.2	| Symbols: SPL13A, SPL13 | Squamosa promoter-binding protein-like (SBP domain) transcription factor family protein| chr5:20582555-20583791 REVERSE LENGTH=359	1e-67
chr6LG2_19401898_19401979	mir156	Psat3g069560.1	AT2G42200.1	| Symbols: SPL9, AtSPL9 | squamosa promoter binding protein-like 9 | chr2:17587601-17589451 FORWARD LENGTH=375	5e-65
chr6LG2_19401898_19401979	mir156	Psat6g101960.1	AT2G42200.1	| Symbols: SPL9, AtSPL9 | squamosa promoter binding protein-like 9 | chr2:17587601-17589451 FORWARD LENGTH=375	2e-54
chr6LG2_19401898_19401979	mir156	Psat3g157680.1	AT1G27360.4	| Symbols: SPL11 | squamosa promoter-like 11 | chr1:9502139-9503715 FORWARD LENGTH=393	7e-38
chr6LG2_19401898_19401979	mir156	Psat2g077800.2	No hits found
chr6LG2_19401898_19401979	mir156	Psat2g077800.3	No hits found
chr6LG2_19401898_19401979	mir156	Psat2g077800.1	No hits found
chr6LG2_19401898_19401979	mir156	Psat5g040520.1	AT4G00340.1	| Symbols: RLK4 | receptor-like protein kinase 4 | chr4:148958-151496 FORWARD LENGTH=818	2e-97
chr6LG2_19401898_19401979	mir156	Psat3g164360.1	AT5G50570.2	| Symbols: SPL13A, SPL13 | Squamosa promoter-binding protein-like (SBP domain) transcription factor family protein| chr5:20582555-20583791 REVERSE LENGTH=359	4e-43
chr6LG2_19401898_19401979	mir156	Psat3g164360.2	AT5G50570.2	| Symbols: SPL13A, SPL13 | Squamosa promoter-binding protein-like (SBP domain) transcription factor family protein| chr5:20582555-20583791 REVERSE LENGTH=359	4e-43
chr6LG2_19401898_19401979	mir156	Psat6g022200.1	AT3G07990.1	| Symbols: SCPL27 | serine carboxypeptidase-like 27 | chr3:2552544-2554644 FORWARD LENGTH=459	4e-46
chr6LG2_19401898_19401979	mir156	Psat5g196400.1	AT5G17230.2	| Symbols: PSY | PHYTOENE SYNTHASE | chr5:5659839-5662087 REVERSE LENGTH=422	0
chr6LG2_19401898_19401979	mir156	Psat5g196400.2	AT5G17230.2	| Symbols: PSY | PHYTOENE SYNTHASE | chr5:5659839-5662087 REVERSE LENGTH=422	1e-122
chr6LG2_19401898_19401979	mir156	Psat5g196400.3	AT5G17230.2	| Symbols: PSY | PHYTOENE SYNTHASE | chr5:5659839-5662087 REVERSE LENGTH=422	1e-65
chr6LG2_19401898_19401979	mir156	Psat6g033960.2	AT5G25610.1	| Symbols: RD22, ATRD22 | BURP domain-containing protein | chr5:8914498-8916684 REVERSE LENGTH=392	1e-109
chr6LG2_19401898_19401979	mir156	Psat6g033960.1	AT5G25610.1	| Symbols: RD22, ATRD22 | BURP domain-containing protein | chr5:8914498-8916684 REVERSE LENGTH=392	5e-119
chr6LG2_19401898_19401979	mir156	Psat7g216840.1	AT2G28840.1	| Symbols: XBAT31 | XB3 ortholog 1 in Arabidopsis thaliana | chr2:12378542-12380474 FORWARD LENGTH=456	1e-171
chr6LG2_19401898_19401979	mir156	Psat3g194440.1	AT3G29290.1	| Symbols: emb2076 | Pentatricopeptide repeat (PPR) superfamily protein | chr3:11238421-11240125 FORWARD LENGTH=540	2e-153
chr6LG2_19401898_19401979	mir156	Psat4g057000.1	AT1G24450.1	| Symbols: NFD2 | Ribonuclease III family protein | chr1:8664201-8665077 FORWARD LENGTH=191	9e-57
chr6LG2_19401898_19401979	mir156	Psat3g138600.1	AT2G37660.1	| Symbols: | NAD(P)-binding Rossmann-fold superfamily protein | chr2:15795481-15796977 REVERSE LENGTH=325	5e-160
chr6LG2_19401898_19401979	mir156	Psat2g015200.1	AT1G50840.1	| Symbols: POLGAMMA2 | polymerase gamma 2 | chr1:18839277-18844313 FORWARD LENGTH=1050	0
chr6LG2_19401898_19401979	mir156	Psat3g125960.1	AT3G08960.1	| Symbols: | ARM repeat superfamily protein | chr3:2730405-2736762 REVERSE LENGTH=1010	0
chr6LG2_19401898_19401979	mir156	Psat1g146960.2	AT4G25910.1	| Symbols: NFU3, ATCNFU3 | NFU domain protein 3 | chr4:13164128-13165094 FORWARD LENGTH=236	1e-53
chr6LG2_19401898_19401979	mir156	Psat1g146960.1	AT4G25910.1	| Symbols: NFU3, ATCNFU3 | NFU domain protein 3 | chr4:13164128-13165094 FORWARD LENGTH=236	9e-93
chr6LG2_19401898_19401979	mir156	Psat1g132880.1	AT5G12080.3	| Symbols: MSL10, ATMSL10 | mechanosensitive channel of small conductance-like 10 | chr5:3898182-3900923 REVERSE LENGTH=734	0
chr6LG2_19401898_19401979	mir156	Psat2g171720.1	AT4G37670.2	| Symbols: NAGS2 | N-acetyl-l-glutamate synthase 2 | chr4:17696179-17698836 REVERSE LENGTH=613	0
chr6LG2_58037674_58037815	mir166	Psat2g173760.1	AT3G57990.1	| Symbols: | unknown protein; Has 1497 Blast hits to 1323 proteins in 52 species: Archae - 0; Bacteria - 4;Metazoa - 23; Fungi - 34; Plants - 61; Viruses - 0; Other Eukaryotes- 1375 (source: NCBI BLink). | chr3:21470244-21471347 REVERSE LENGTH=367	9e-31
chr6LG2_58037674_58037815	mir166	Psat1g131440.1	No hits found
chr6LG2_58037674_58037815	mir166	Psat6g110720.1	No hits found
chr6LG2_64029994_64030124	mir167_1	Psat5g229040.1	AT1G53000.1	| Symbols: KDSB | Nucleotide-diphospho-sugar transferases superfamily protein | chr1:19745330-19747133 REVERSE LENGTH=290	1e-174
chr6LG2_64029994_64030124	mir167_1	Psat2g167360.2	AT5G67030.1	| Symbols: ABA1, LOS6, NPQ2, ATABA1, ZEP, IBS3, ATZEP | zeaxanthin epoxidase (ZEP) (ABA1) | chr5:26753745-26757090 REVERSE LENGTH=667	0
chr6LG2_64029994_64030124	mir167_1	Psat2g167360.3	AT5G67030.1	| Symbols: ABA1, LOS6, NPQ2, ATABA1, ZEP, IBS3, ATZEP | zeaxanthin epoxidase (ZEP) (ABA1) | chr5:26753745-26757090 REVERSE LENGTH=667	0
chr6LG2_64029994_64030124	mir167_1	Psat2g167360.1	AT5G67030.1	| Symbols: ABA1, LOS6, NPQ2, ATABA1, ZEP, IBS3, ATZEP | zeaxanthin epoxidase (ZEP) (ABA1) | chr5:26753745-26757090 REVERSE LENGTH=667	0
chr6LG2_64029994_64030124	mir167_1	Psat3g108400.1	AT4G00450.1	| Symbols: CRP, CCT | RNA polymerase II transcription mediators | chr4:202425-210666 FORWARD LENGTH=2253	0
chr6LG2_64029994_64030124	mir167_1	Psat3g108400.3	AT4G00450.1	| Symbols: CRP, CCT | RNA polymerase II transcription mediators | chr4:202425-210666 FORWARD LENGTH=2253	0
chr6LG2_64029994_64030124	mir167_1	Psat3g108400.2	AT4G00450.1	| Symbols: CRP, CCT | RNA polymerase II transcription mediators | chr4:202425-210666 FORWARD LENGTH=2253	0
chr6LG2_64029994_64030124	mir167_1	Psat0s3082g0040.1	AT3G14350.1	| Symbols: SRF7 | STRUBBELIG-receptor family 7 | chr3:4783115-4786999 REVERSE LENGTH=717	0
chr6LG2_64029994_64030124	mir167_1	Psat1g004040.1	AT3G14350.2	| Symbols: SRF7 | STRUBBELIG-receptor family 7 | chr3:4783115-4786397 REVERSE LENGTH=680	8e-106
chr6LG2_64029994_64030124	mir167_1	Psat6g243600.1	AT2G31660.1	| Symbols: SAD2, URM9 | ARM repeat superfamily protein | chr2:13464519-13471353 FORWARD LENGTH=1040	0
chr6LG2_64029994_64030124	mir167_1	Psat6g029600.3	AT2G25530.1	| Symbols: | AFG1-like ATPase family protein | chr2:10863059-10866597 FORWARD LENGTH=655	0
chr6LG2_64029994_64030124	mir167_1	Psat6g029600.1	AT2G25530.1	| Symbols: | AFG1-like ATPase family protein | chr2:10863059-10866597 FORWARD LENGTH=655	0
chr6LG2_64029994_64030124	mir167_1	Psat6g029600.2	AT2G25530.1	| Symbols: | AFG1-like ATPase family protein | chr2:10863059-10866597 FORWARD LENGTH=655	0
chr6LG2_64029994_64030124	mir167_1	Psat1g168640.1	AT3G54950.1	| Symbols: PLP7, PLA IIIA | patatin-like protein 6 | chr3:20359076-20360774 REVERSE LENGTH=488	1e-137
chr6LG2_64029994_64030124	mir167_1	Psat1g192000.1	AT1G30330.1	| Symbols: ARF6 | auxin response factor 6 | chr1:10686125-10690036 REVERSE LENGTH=933	0
chr6LG2_64029994_64030124	mir167_1	Psat2g042360.1	AT5G37020.1	| Symbols: ARF8, ATARF8 | auxin response factor 8 | chr5:14630151-14634106 FORWARD LENGTH=811	0
chr6LG2_64029994_64030124	mir167_1	Psat2g042360.2	AT5G37020.2	| Symbols: ARF8 | auxin response factor 8 | chr5:14630151-14633916 FORWARD LENGTH=773	0
chr6LG2_64029994_64030124	mir167_1	Psat7g078800.1	AT1G30330.2	| Symbols: ARF6 | auxin response factor 6 | chr1:10686125-10690036 REVERSE LENGTH=935	0
chr6LG2_64029994_64030124	mir167_1	Psat5g144000.1	AT5G37020.1	| Symbols: ARF8, ATARF8 | auxin response factor 8 | chr5:14630151-14634106 FORWARD LENGTH=811	0
chr6LG2_64029994_64030124	mir167_1	Psat7g142800.1	AT2G05990.2	| Symbols: MOD1, ENR1 | NAD(P)-binding Rossmann-fold superfamily protein | chr2:2322876-2324867 FORWARD LENGTH=390	3e-67
chr6LG2_64029994_64030124	mir167_1	Psat4g072520.1	AT4G16650.1	| Symbols: | O-fucosyltransferase family protein | chr4:9372727-9375910 FORWARD LENGTH=549	0
chr6LG2_64029994_64030124	mir167_1	Psat2g059600.1	AT2G38080.1	| Symbols: IRX12, LAC4, ATLMCO4, LMCO4 | Laccase/Diphenol oxidase family protein | chr2:15934540-15937352 FORWARD LENGTH=558	0
chr6LG2_64029994_64030124	mir167_1	Psat7g227760.1	AT1G50510.1	| Symbols: | indigoidine synthase A family protein | chr1:18716578-18719060 FORWARD LENGTH=330	6e-159
chr6LG2_64029994_64030124	mir167_1	Psat7g227760.2	AT1G50510.1	| Symbols: | indigoidine synthase A family protein | chr1:18716578-18719060 FORWARD LENGTH=330	6e-149
chr6LG2_64029994_64030124	mir167_1	Psat7g227760.3	AT1G50510.1	| Symbols: | indigoidine synthase A family protein | chr1:18716578-18719060 FORWARD LENGTH=330	8e-133
chr6LG2_64029994_64030124	mir167_1	Psat7g112840.1	AT4G04920.2	| Symbols: SFR6 | sensitive to freezing 6 | chr4:2497931-2504996 FORWARD LENGTH=1267	0
chr6LG2_64029994_64030124	mir167_1	Psat7g261320.1	AT4G31540.1	| Symbols: ATEXO70G1, EXO70G1 | exocyst subunit exo70 family protein G1 | chr4:15284739-15286802 REVERSE LENGTH=687	0
chr6LG2_64029994_64030124	mir167_1	Psat1g145480.1	AT4G29960.1	| Symbols: | unknown protein; FUNCTIONS IN: molecular_function unknown; INVOLVED IN: biological_process unknown;LOCATED IN: plasma membrane; EXPRESSED IN: 23 plant structures;EXPRESSED DURING: 15 growth stages; Has 30201 Blast hits to 17322 proteins in 780 species: Archae - 12; Bacteria- 1396; Metazoa - 17338; Fungi - 3422; Plants - 5037; Viruses- 0; Other Eukaryotes - 2996 (source: NCBI BLink). …	4e-96
chr6LG2_64029994_64030124	mir167_1	Psat5g027120.1	AT1G15520.1	| Symbols: PDR12, ATPDR12, ABCG40, ATABCG40 | pleiotropic drug resistance 12 | chr1:5331993-5338175 REVERSE LENGTH=1423	0
chr6LG2_64029994_64030124	mir167_1	Psat3g089480.2	AT5G18230.1	| Symbols: | transcription regulator NOT2/NOT3/NOT5 family protein | chr5:6021610-6027031 REVERSE LENGTH=843	0
chr6LG2_64029994_64030124	mir167_1	Psat3g089480.1	AT5G18230.1	| Symbols: | transcription regulator NOT2/NOT3/NOT5 family protein | chr5:6021610-6027031 REVERSE LENGTH=843	0
chr6LG2_81769030_81769289	mir160	Psat5g135840.1	AT1G77850.1	| Symbols: ARF17 | auxin response factor 17 | chr1:29272405-29275193 FORWARD LENGTH=585	9e-164
chr6LG2_81769030_81769289	mir160	Psat5g135840.2	AT1G77850.1	| Symbols: ARF17 | auxin response factor 17 | chr1:29272405-29275193 FORWARD LENGTH=585	9e-164
chr6LG2_81769030_81769289	mir160	Psat6g070800.2	AT4G30080.1	| Symbols: ARF16 | auxin response factor 16 | chr4:14703369-14705564 REVERSE LENGTH=670	0
chr6LG2_81769030_81769289	mir160	Psat6g070800.1	AT4G30080.1	| Symbols: ARF16 | auxin response factor 16 | chr4:14703369-14705564 REVERSE LENGTH=670	0
chr6LG2_81769030_81769289	mir160	Psat7g218280.1	AT4G30080.1	| Symbols: ARF16 | auxin response factor 16 | chr4:14703369-14705564 REVERSE LENGTH=670	1e-17
chr6LG2_81769030_81769289	mir160	Psat3g042920.1	AT4G30080.1	| Symbols: ARF16 | auxin response factor 16 | chr4:14703369-14705564 REVERSE LENGTH=670	9e-116
chr6LG2_81769030_81769289	mir160	Psat3g043080.1	AT4G30080.1	| Symbols: ARF16 | auxin response factor 16 | chr4:14703369-14705564 REVERSE LENGTH=670	2e-159
chr6LG2_81769030_81769289	mir160	Psat5g210680.1	AT4G30080.1	| Symbols: ARF16 | auxin response factor 16 | chr4:14703369-14705564 REVERSE LENGTH=670	2e-125
chr6LG2_81769030_81769289	mir160	Psat5g210640.1	No hits found
chr6LG2_81769030_81769289	mir160	Psat3g043840.1	AT4G30080.1	| Symbols: ARF16 | auxin response factor 16 | chr4:14703369-14705564 REVERSE LENGTH=670	9e-141
chr6LG2_81769030_81769289	mir160	Psat3g042800.1	AT4G30080.1	| Symbols: ARF16 | auxin response factor 16 | chr4:14703369-14705564 REVERSE LENGTH=670	9e-132
chr6LG2_81769030_81769289	mir160	Psat6g183360.1	AT4G30080.1	| Symbols: ARF16 | auxin response factor 16 | chr4:14703369-14705564 REVERSE LENGTH=670	0
chr6LG2_81769030_81769289	mir160	Psat5g280080.2	AT4G30080.1	| Symbols: ARF16 | auxin response factor 16 | chr4:14703369-14705564 REVERSE LENGTH=670	0
chr6LG2_81769030_81769289	mir160	Psat5g280080.1	AT2G28350.1	| Symbols: ARF10 | auxin response factor 10 | chr2:12114331-12116665 FORWARD LENGTH=693	0
chr6LG2_81769030_81769289	mir160	Psat5g054120.1	AT4G30080.1	| Symbols: ARF16 | auxin response factor 16 | chr4:14703369-14705564 REVERSE LENGTH=670	1e-107
chr6LG2_81769030_81769289	mir160	Psat3g043720.1	AT4G30080.1	| Symbols: ARF16 | auxin response factor 16 | chr4:14703369-14705564 REVERSE LENGTH=670	8e-98
chr6LG2_81769030_81769289	mir160	Psat3g042760.1	AT4G30080.1	| Symbols: ARF16 | auxin response factor 16 | chr4:14703369-14705564 REVERSE LENGTH=670	1e-117
chr6LG2_81769030_81769289	mir160	Psat3g042760.2	AT4G30080.1	| Symbols: ARF16 | auxin response factor 16 | chr4:14703369-14705564 REVERSE LENGTH=670	1e-117
chr6LG2_81769030_81769289	mir160	Psat0s3594g0040.1	AT2G28350.1	| Symbols: ARF10 | auxin response factor 10 | chr2:12114331-12116665 FORWARD LENGTH=693	0
chr6LG2_81769030_81769289	mir160	Psat3g042840.1	AT4G30080.1	| Symbols: ARF16 | auxin response factor 16 | chr4:14703369-14705564 REVERSE LENGTH=670	5e-26
chr6LG2_81769030_81769289	mir160	Psat5g054160.1	AT4G30080.1	| Symbols: ARF16 | auxin response factor 16 | chr4:14703369-14705564 REVERSE LENGTH=670	2e-95
chr6LG2_81769030_81769289	mir160	Psat0s5865g0120.1	AT1G77850.1	| Symbols: ARF17 | auxin response factor 17 | chr1:29272405-29275193 FORWARD LENGTH=585	5e-75
chr6LG2_81769030_81769289	mir160	Psat2g034920.1	AT1G77850.1	| Symbols: ARF17 | auxin response factor 17 | chr1:29272405-29275193 FORWARD LENGTH=585	5e-84
chr6LG2_81769030_81769289	mir160	Psat4g150840.1	No hits found
chr6LG2_171486425_171486530	mir167_1	Psat5g229040.1	AT1G53000.1	| Symbols: KDSB | Nucleotide-diphospho-sugar transferases superfamily protein | chr1:19745330-19747133 REVERSE LENGTH=290	1e-174
chr6LG2_171486425_171486530	mir167_1	Psat2g167360.2	AT5G67030.1	| Symbols: ABA1, LOS6, NPQ2, ATABA1, ZEP, IBS3, ATZEP | zeaxanthin epoxidase (ZEP) (ABA1) | chr5:26753745-26757090 REVERSE LENGTH=667	0
chr6LG2_171486425_171486530	mir167_1	Psat2g167360.3	AT5G67030.1	| Symbols: ABA1, LOS6, NPQ2, ATABA1, ZEP, IBS3, ATZEP | zeaxanthin epoxidase (ZEP) (ABA1) | chr5:26753745-26757090 REVERSE LENGTH=667	0
chr6LG2_171486425_171486530	mir167_1	Psat2g167360.1	AT5G67030.1	| Symbols: ABA1, LOS6, NPQ2, ATABA1, ZEP, IBS3, ATZEP | zeaxanthin epoxidase (ZEP) (ABA1) | chr5:26753745-26757090 REVERSE LENGTH=667	0
chr6LG2_171486425_171486530	mir167_1	Psat3g108400.1	AT4G00450.1	| Symbols: CRP, CCT | RNA polymerase II transcription mediators | chr4:202425-210666 FORWARD LENGTH=2253	0
chr6LG2_171486425_171486530	mir167_1	Psat3g108400.2	AT4G00450.1	| Symbols: CRP, CCT | RNA polymerase II transcription mediators | chr4:202425-210666 FORWARD LENGTH=2253	0
chr6LG2_171486425_171486530	mir167_1	Psat3g108400.3	AT4G00450.1	| Symbols: CRP, CCT | RNA polymerase II transcription mediators | chr4:202425-210666 FORWARD LENGTH=2253	0
chr6LG2_171486425_171486530	mir167_1	Psat6g243600.1	AT2G31660.1	| Symbols: SAD2, URM9 | ARM repeat superfamily protein | chr2:13464519-13471353 FORWARD LENGTH=1040	0
chr6LG2_171486425_171486530	mir167_1	Psat6g029600.3	AT2G25530.1	| Symbols: | AFG1-like ATPase family protein | chr2:10863059-10866597 FORWARD LENGTH=655	0
chr6LG2_171486425_171486530	mir167_1	Psat6g029600.2	AT2G25530.1	| Symbols: | AFG1-like ATPase family protein | chr2:10863059-10866597 FORWARD LENGTH=655	0
chr6LG2_171486425_171486530	mir167_1	Psat6g029600.1	AT2G25530.1	| Symbols: | AFG1-like ATPase family protein | chr2:10863059-10866597 FORWARD LENGTH=655	0
chr6LG2_171486425_171486530	mir167_1	Psat7g078800.1	AT1G30330.2	| Symbols: ARF6 | auxin response factor 6 | chr1:10686125-10690036 REVERSE LENGTH=935	0
chr6LG2_171486425_171486530	mir167_1	Psat2g059600.1	AT2G38080.1	| Symbols: IRX12, LAC4, ATLMCO4, LMCO4 | Laccase/Diphenol oxidase family protein | chr2:15934540-15937352 FORWARD LENGTH=558	0
chr6LG2_171486425_171486530	mir167_1	Psat7g261320.1	AT4G31540.1	| Symbols: ATEXO70G1, EXO70G1 | exocyst subunit exo70 family protein G1 | chr4:15284739-15286802 REVERSE LENGTH=687	0
chr6LG2_171486425_171486530	mir167_1	Psat1g145480.1	AT4G29960.1	| Symbols: | unknown protein; FUNCTIONS IN: molecular_function unknown; INVOLVED IN: biological_process unknown;LOCATED IN: plasma membrane; EXPRESSED IN: 23 plant structures;EXPRESSED DURING: 15 growth stages; Has 30201 Blast hits to 17322 proteins in 780 species: Archae - 12; Bacteria- 1396; Metazoa - 17338; Fungi - 3422; Plants - 5037; Viruses- 0; Other Eukaryotes - 2996 (source: NCBI BLink). …	4e-96
chr6LG2_188979232_188979383		Psat5g011840.1	AT1G76240.1	| Symbols: | Arabidopsis protein of unknown function (DUF241) | chr1:28602949-28603875 REVERSE LENGTH=308	2e-69
chr6LG2_188979232_188979383		Psat2g122280.4	AT1G69780.1	| Symbols: ATHB13 | Homeobox-leucine zipper protein family | chr1:26259166-26260465 FORWARD LENGTH=294	7e-76
chr6LG2_188979232_188979383		Psat2g122280.5	AT1G69780.1	| Symbols: ATHB13 | Homeobox-leucine zipper protein family | chr1:26259166-26260465 FORWARD LENGTH=294	7e-76
chr6LG2_188979232_188979383		Psat2g122280.3	AT1G69780.1	| Symbols: ATHB13 | Homeobox-leucine zipper protein family | chr1:26259166-26260465 FORWARD LENGTH=294	5e-103
chr6LG2_188979232_188979383		Psat2g122280.6	AT1G69780.1	| Symbols: ATHB13 | Homeobox-leucine zipper protein family | chr1:26259166-26260465 FORWARD LENGTH=294	5e-103
chr6LG2_188979232_188979383		Psat2g122280.1	AT1G69780.1	| Symbols: ATHB13 | Homeobox-leucine zipper protein family | chr1:26259166-26260465 FORWARD LENGTH=294	8e-116
chr6LG2_188979232_188979383		Psat2g122280.2	AT1G69780.1	| Symbols: ATHB13 | Homeobox-leucine zipper protein family | chr1:26259166-26260465 FORWARD LENGTH=294	8e-116
chr6LG2_188979232_188979383		Psat6g219200.1	AT2G15290.1	| Symbols: ATTIC21, TIC21, CIA5, PIC1 | translocon at inner membrane of chloroplasts 21 | chr2:6642512-6644011 REVERSE LENGTH=296	9e-113
chr6LG2_188979232_188979383		Psat6g219200.2	AT2G15290.1	| Symbols: ATTIC21, TIC21, CIA5, PIC1 | translocon at inner membrane of chloroplasts 21 | chr2:6642512-6644011 REVERSE LENGTH=296	9e-113
chr6LG2_188979232_188979383		Psat3g158640.1	AT1G02060.1	| Symbols: | Tetratricopeptide repeat (TPR)-like superfamily protein | chr1:360918-363050 REVERSE LENGTH=710	0
chr6LG2_188979232_188979383		Psat1g111240.1	AT1G63440.1	| Symbols: HMA5 | heavy metal atpase 5 | chr1:23527655-23531109 FORWARD LENGTH=995	0
chr6LG2_188979232_188979383		Psat1g111240.2	AT1G63440.1	| Symbols: HMA5 | heavy metal atpase 5 | chr1:23527655-23531109 FORWARD LENGTH=995	0
chr6LG2_188979232_188979383		Psat1g111240.3	AT1G63440.1	| Symbols: HMA5 | heavy metal atpase 5 | chr1:23527655-23531109 FORWARD LENGTH=995	0
chr6LG2_188979232_188979383		Psat5g260440.3	AT3G16030.1	| Symbols: CES101 | lectin protein kinase family protein | chr3:5439609-5442802 FORWARD LENGTH=850	5e-142
chr6LG2_188979232_188979383		Psat5g260440.4	AT3G16030.1	| Symbols: CES101 | lectin protein kinase family protein | chr3:5439609-5442802 FORWARD LENGTH=850	5e-135
chr6LG2_188979232_188979383		Psat5g260440.1	AT3G16030.1	| Symbols: CES101 | lectin protein kinase family protein | chr3:5439609-5442802 FORWARD LENGTH=850	6e-166
chr6LG2_188979232_188979383		Psat5g260440.2	AT3G16030.1	| Symbols: CES101 | lectin protein kinase family protein | chr3:5439609-5442802 FORWARD LENGTH=850	6e-159
chr6LG2_188979232_188979383		Psat4g144400.1	AT2G40030.1	| Symbols: NRPD1B, DRD3, ATNRPD1B, DMS5, NRPE1 | nuclear RNA polymerase D1B | chr2:16715089-16723406 FORWARD LENGTH=1976	0
chr6LG2_188979232_188979383		Psat2g084520.1	No hits found
chr6LG2_188979232_188979383		Psat6g197120.4	AT4G25610.2	| Symbols: | C2H2-like zinc finger protein | chr4:13063801-13066970 FORWARD LENGTH=571	5e-109
chr6LG2_188979232_188979383		Psat6g197120.3	AT4G25610.2	| Symbols: | C2H2-like zinc finger protein | chr4:13063801-13066970 FORWARD LENGTH=571	9e-128
chr6LG2_188979232_188979383		Psat6g197120.1	AT4G25610.1	| Symbols: | C2H2-like zinc finger protein | chr4:13063801-13066860 FORWARD LENGTH=586	2e-122
chr6LG2_188979232_188979383		Psat6g197120.2	AT4G25610.1	| Symbols: | C2H2-like zinc finger protein | chr4:13063801-13066860 FORWARD LENGTH=586	7e-142
chr6LG2_188979232_188979383		Psat5g142520.1	AT1G65910.1	| Symbols: anac028, NAC028 | NAC domain containing protein 28 | chr1:24520933-24524108 REVERSE LENGTH=631	6e-164
chr6LG2_227595365_227595525	mir5232-m	Psat5g056680.1	AT3G50590.1	| Symbols: | Transducin/WD40 repeat-like superfamily protein | chr3:18771292-18779220 FORWARD LENGTH=1614	7e-26
chr6LG2_227595365_227595525	mir5232-m	Psat3g160680.1	AT4G31590.1	| Symbols: ATCSLC05, CSLC05, ATCSLC5, CSLC5 | Cellulose-synthase-like C5 | chr4:15309889-15312336 REVERSE LENGTH=692	2e-36
chr6LG2_227595365_227595525	mir5232-m	Psat2g189320.1	AT1G11755.1	| Symbols: LEW1 | Undecaprenyl pyrophosphate synthetase family protein | chr1:3969987-3971488 REVERSE LENGTH=254	5e-79
chr6LG2_234595517_234595637	mir166	Psat4g221480.1	AT1G52150.1	| Symbols: ATHB-15, ATHB15, CNA, ICU4 | Homeobox-leucine zipper family protein / lipid-binding START domain-containing protein | chr1:19409913-19413961 REVERSE LENGTH=836	0
chr6LG2_234595517_234595637	mir166	Psat5g297000.1	AT1G52150.1	| Symbols: ATHB-15, ATHB15, CNA, ICU4 | Homeobox-leucine zipper family protein / lipid-binding START domain-containing protein | chr1:19409913-19413961 REVERSE LENGTH=836	0
chr6LG2_234595517_234595637	mir166	Psat4g221480.2	AT1G52150.3	| Symbols: ATHB-15, ATHB15, CNA, ICU4 | Homeobox-leucine zipper family protein / lipid-binding START domain-containing protein | chr1:19410118-19413961 REVERSE LENGTH=794	0
chr6LG2_234595517_234595637	mir166	Psat1g167760.1	AT2G34710.1	| Symbols: PHB, ATHB14, ATHB-14, PHB-1D | Homeobox-leucine zipper family protein / lipid-binding START domain-containing protein | chr2:14639548-14643993 REVERSE LENGTH=852	0
chr6LG2_234595517_234595637	mir166	Psat7g225360.1	AT5G60690.1	| Symbols: REV, IFL, IFL1 | Homeobox-leucine zipper family protein / lipid-binding START domain-containing protein| chr5:24397734-24401933 FORWARD LENGTH=842	0
chr6LG2_234595517_234595637	mir166	Psat1g167760.2	AT2G34710.1	| Symbols: PHB, ATHB14, ATHB-14, PHB-1D | Homeobox-leucine zipper family protein / lipid-binding START domain-containing protein | chr2:14639548-14643993 REVERSE LENGTH=852	0
chr6LG2_234595517_234595637	mir166	Psat5g279960.1	AT5G60690.1	| Symbols: REV, IFL, IFL1 | Homeobox-leucine zipper family protein / lipid-binding START domain-containing protein| chr5:24397734-24401933 FORWARD LENGTH=842	0
chr6LG2_234595517_234595637	mir166	Psat5g020800.1	AT4G32880.1	| Symbols: ATHB-8, ATHB8, HB-8 | homeobox gene 8 | chr4:15863587-15867822 REVERSE LENGTH=833	0
chr6LG2_234595517_234595637	mir166	Psat2g173760.1	AT3G57990.1	| Symbols: | unknown protein; Has 1497 Blast hits to 1323 proteins in 52 species: Archae - 0; Bacteria - 4;Metazoa - 23; Fungi - 34; Plants - 61; Viruses - 0; Other Eukaryotes- 1375 (source: NCBI BLink). | chr3:21470244-21471347 REVERSE LENGTH=367	9e-31
chr6LG2_234595517_234595637	mir166	Psat1g131440.1	No hits found
chr6LG2_274643746_274644013	mir159	Psat3g025280.1	No hits found
chr6LG2_274643746_274644013	mir159	Psat5g300240.1	No hits found
chr6LG2_274643746_274644013	mir159	Psat2g046920.1	No hits found
chr6LG2_274643746_274644013	mir159	Psat5g300120.1	No hits found
chr6LG2_274643746_274644013	mir159	Psat1g200600.1	No hits found
chr6LG2_274643746_274644013	mir159	Psat5g232040.1	No hits found
chr6LG2_274643746_274644013	mir159	Psat5g208640.1	AT2G32460.1	| Symbols: MYB101, ATMYB101, ATM1 | myb domain protein 101 | chr2:13782419-13784363 REVERSE LENGTH=490	1e-56
chr6LG2_274643746_274644013	mir159	Psat2g127640.1	AT3G29750.1	| Symbols: | Eukaryotic aspartyl protease family protein | chr3:11579125-11580600 REVERSE LENGTH=421	1e-08
chr6LG2_274643746_274644013	mir159	Psat3g197960.1	No hits found
chr6LG2_274643746_274644013	mir159	Psat0s1551g0120.1	AT5G14180.1	| Symbols: MPL1 | Myzus persicae-induced lipase 1 | chr5:4571442-4574413 REVERSE LENGTH=418	3e-28
chr6LG2_274643746_274644013	mir159	Psat4g060720.1	No hits found
chr6LG2_274643746_274644013	mir159	Psat4g226000.1	AT3G60460.1	| Symbols: DUO1 | myb-like HTH transcriptional regulator family protein | chr3:22342429-22343491 REVERSE LENGTH=297	2e-78
chr6LG2_274643746_274644013	mir159	Psat5g225360.3	AT5G06100.1	| Symbols: MYB33, ATMYB33 | myb domain protein 33 | chr5:1838555-1839997 FORWARD LENGTH=451	2e-93
chr6LG2_274643746_274644013	mir159	Psat5g225360.1	AT3G11440.1	| Symbols: ATMYB65, MYB65 | myb domain protein 65 | chr3:3603056-3604929 FORWARD LENGTH=553	3e-101
chr6LG2_274643746_274644013	mir159	Psat5g225360.2	AT3G11440.1	| Symbols: ATMYB65, MYB65 | myb domain protein 65 | chr3:3603056-3604929 FORWARD LENGTH=553	3e-101
chr6LG2_274643746_274644013	mir159	Psat5g079920.1	No hits found
chr6LG2_274643746_274644013	mir159	Psat1g012480.1	AT1G67020.1	| Symbols: | unknown protein; FUNCTIONS IN: molecular_function unknown; INVOLVED IN: biological_process unknown;LOCATED IN: cellular_component unknown; EXPRESSED IN: leaf;Has 72 Blast hits to 72 proteins in 9 species: Archae -0; Bacteria - 0; Metazoa - 0; Fungi - 0; Plants - 72; Viruses- 0; Other Eukaryotes - 0 (source: NCBI BLink). | chr1:25011008-25012987 REVERSE LENGTH=659	6e-06
chr6LG2_274643746_274644013	mir159	Psat4g090320.1	No hits found
chr6LG2_274643746_274644013	mir159	Psat6g164680.3	AT1G02850.2	| Symbols: BGLU11 | beta glucosidase 11 | chr1:630569-633085 FORWARD LENGTH=497	2e-173
chr6LG2_274643746_274644013	mir159	Psat6g164680.2	AT1G02850.2	| Symbols: BGLU11 | beta glucosidase 11 | chr1:630569-633085 FORWARD LENGTH=497	1e-174
chr6LG2_274643746_274644013	mir159	Psat6g164680.1	AT1G02850.2	| Symbols: BGLU11 | beta glucosidase 11 | chr1:630569-633085 FORWARD LENGTH=497	0
chr6LG2_274643746_274644013	mir159	Psat2g011840.1	No hits found
chr6LG2_274643746_274644013	mir159	Psat2g011880.1	No hits found
chr6LG2_274643746_274644013	mir159	Psat5g117920.1	AT3G29750.1	| Symbols: | Eukaryotic aspartyl protease family protein | chr3:11579125-11580600 REVERSE LENGTH=421	3e-10
chr6LG2_274643746_274644013	mir159	Psat6g169480.1	AT1G67020.1	| Symbols: | unknown protein; FUNCTIONS IN: molecular_function unknown; INVOLVED IN: biological_process unknown;LOCATED IN: cellular_component unknown; EXPRESSED IN: leaf;Has 72 Blast hits to 72 proteins in 9 species: Archae -0; Bacteria - 0; Metazoa - 0; Fungi - 0; Plants - 72; Viruses- 0; Other Eukaryotes - 0 (source: NCBI BLink). | chr1:25011008-25012987 REVERSE LENGTH=659	7e-07
chr6LG2_274643746_274644013	mir159	Psat7g011880.1	AT3G29750.1	| Symbols: | Eukaryotic aspartyl protease family protein | chr3:11579125-11580600 REVERSE LENGTH=421	7e-10
chr6LG2_274643746_274644013	mir159	Psat1g111280.1	AT3G29750.1	| Symbols: | Eukaryotic aspartyl protease family protein | chr3:11579125-11580600 REVERSE LENGTH=421	4e-09
chr6LG2_274643746_274644013	mir159	Psat6g181280.1	AT3G29750.1	| Symbols: | Eukaryotic aspartyl protease family protein | chr3:11579125-11580600 REVERSE LENGTH=421	5e-08
chr6LG2_274643746_274644013	mir159	Psat5g235280.1	AT3G29750.1	| Symbols: | Eukaryotic aspartyl protease family protein | chr3:11579125-11580600 REVERSE LENGTH=421	1e-10
chr6LG2_274643746_274644013	mir159	Psat5g240600.3	No hits found
chr6LG2_274643746_274644013	mir159	Psat5g240600.4	No hits found
chr6LG2_274643746_274644013	mir159	Psat5g211160.1	AT5G06100.1	| Symbols: MYB33, ATMYB33 | myb domain protein 33 | chr5:1838555-1839997 FORWARD LENGTH=451	4e-19
chr6LG2_274643746_274644013	mir159	Psat5g240600.2	No hits found
chr6LG2_274643746_274644013	mir159	Psat0s91g0080.1	No hits found
chr6LG2_274643746_274644013	mir159	Psat5g240600.1	No hits found
chr6LG2_274643746_274644013	mir159	Psat5g210080.1	AT5G06100.1	| Symbols: MYB33, ATMYB33 | myb domain protein 33 | chr5:1838555-1839997 FORWARD LENGTH=451	2e-65
chr6LG2_274643746_274644013	mir159	Psat7g134880.1	AT5G15310.2	| Symbols: ATMYB16, ATMIXTA, MYB16 | myb domain protein 16 | chr5:4974894-4976106 FORWARD LENGTH=315	6e-99
chr6LG2_274643746_274644013	mir159	Psat6g141840.1	AT5G63930.1	| Symbols: | Leucine-rich repeat protein kinase family protein | chr5:25583006-25586392 FORWARD LENGTH=1102	0
chr6LG2_274643746_274644013	mir159	Psat6g131600.1	No hits found
chr6LG2_274643746_274644013	mir159	Psat6g131600.2	No hits found
chr6LG2_274643746_274644013	mir159	Psat5g160320.1	No hits found
chr6LG2_275075851_275076139	mir159	Psat3g025280.1	No hits found
chr6LG2_275075851_275076139	mir159	Psat5g300240.1	No hits found
chr6LG2_275075851_275076139	mir159	Psat2g046920.1	No hits found
chr6LG2_275075851_275076139	mir159	Psat5g300120.1	No hits found
chr6LG2_275075851_275076139	mir159	Psat1g200600.1	No hits found
chr6LG2_275075851_275076139	mir159	Psat5g232040.1	No hits found
chr6LG2_275075851_275076139	mir159	Psat5g208640.1	AT2G32460.1	| Symbols: MYB101, ATMYB101, ATM1 | myb domain protein 101 | chr2:13782419-13784363 REVERSE LENGTH=490	1e-56
chr6LG2_275075851_275076139	mir159	Psat2g127640.1	AT3G29750.1	| Symbols: | Eukaryotic aspartyl protease family protein | chr3:11579125-11580600 REVERSE LENGTH=421	1e-08
chr6LG2_275075851_275076139	mir159	Psat3g197960.1	No hits found
chr6LG2_275075851_275076139	mir159	Psat0s1551g0120.1	AT5G14180.1	| Symbols: MPL1 | Myzus persicae-induced lipase 1 | chr5:4571442-4574413 REVERSE LENGTH=418	3e-28
chr6LG2_275075851_275076139	mir159	Psat4g060720.1	No hits found
chr6LG2_275075851_275076139	mir159	Psat4g226000.1	AT3G60460.1	| Symbols: DUO1 | myb-like HTH transcriptional regulator family protein | chr3:22342429-22343491 REVERSE LENGTH=297	2e-78
chr6LG2_275075851_275076139	mir159	Psat5g225360.3	AT5G06100.1	| Symbols: MYB33, ATMYB33 | myb domain protein 33 | chr5:1838555-1839997 FORWARD LENGTH=451	2e-93
chr6LG2_275075851_275076139	mir159	Psat5g225360.1	AT3G11440.1	| Symbols: ATMYB65, MYB65 | myb domain protein 65 | chr3:3603056-3604929 FORWARD LENGTH=553	3e-101
chr6LG2_275075851_275076139	mir159	Psat5g225360.2	AT3G11440.1	| Symbols: ATMYB65, MYB65 | myb domain protein 65 | chr3:3603056-3604929 FORWARD LENGTH=553	3e-101
chr6LG2_275075851_275076139	mir159	Psat5g079920.1	No hits found
chr6LG2_275075851_275076139	mir159	Psat1g012480.1	AT1G67020.1	| Symbols: | unknown protein; FUNCTIONS IN: molecular_function unknown; INVOLVED IN: biological_process unknown;LOCATED IN: cellular_component unknown; EXPRESSED IN: leaf;Has 72 Blast hits to 72 proteins in 9 species: Archae -0; Bacteria - 0; Metazoa - 0; Fungi - 0; Plants - 72; Viruses- 0; Other Eukaryotes - 0 (source: NCBI BLink). | chr1:25011008-25012987 REVERSE LENGTH=659	6e-06
chr6LG2_275075851_275076139	mir159	Psat4g090320.1	No hits found
chr6LG2_275075851_275076139	mir159	Psat6g164680.3	AT1G02850.2	| Symbols: BGLU11 | beta glucosidase 11 | chr1:630569-633085 FORWARD LENGTH=497	2e-173
chr6LG2_275075851_275076139	mir159	Psat6g164680.2	AT1G02850.2	| Symbols: BGLU11 | beta glucosidase 11 | chr1:630569-633085 FORWARD LENGTH=497	1e-174
chr6LG2_275075851_275076139	mir159	Psat6g164680.1	AT1G02850.2	| Symbols: BGLU11 | beta glucosidase 11 | chr1:630569-633085 FORWARD LENGTH=497	0
chr6LG2_275075851_275076139	mir159	Psat2g011840.1	No hits found
chr6LG2_275075851_275076139	mir159	Psat2g011880.1	No hits found
chr6LG2_275075851_275076139	mir159	Psat5g117920.1	AT3G29750.1	| Symbols: | Eukaryotic aspartyl protease family protein | chr3:11579125-11580600 REVERSE LENGTH=421	3e-10
chr6LG2_275075851_275076139	mir159	Psat6g169480.1	AT1G67020.1	| Symbols: | unknown protein; FUNCTIONS IN: molecular_function unknown; INVOLVED IN: biological_process unknown;LOCATED IN: cellular_component unknown; EXPRESSED IN: leaf;Has 72 Blast hits to 72 proteins in 9 species: Archae -0; Bacteria - 0; Metazoa - 0; Fungi - 0; Plants - 72; Viruses- 0; Other Eukaryotes - 0 (source: NCBI BLink). | chr1:25011008-25012987 REVERSE LENGTH=659	7e-07
chr6LG2_275075851_275076139	mir159	Psat7g011880.1	AT3G29750.1	| Symbols: | Eukaryotic aspartyl protease family protein | chr3:11579125-11580600 REVERSE LENGTH=421	7e-10
chr6LG2_275075851_275076139	mir159	Psat1g111280.1	AT3G29750.1	| Symbols: | Eukaryotic aspartyl protease family protein | chr3:11579125-11580600 REVERSE LENGTH=421	4e-09
chr6LG2_275075851_275076139	mir159	Psat6g181280.1	AT3G29750.1	| Symbols: | Eukaryotic aspartyl protease family protein | chr3:11579125-11580600 REVERSE LENGTH=421	5e-08
chr6LG2_275075851_275076139	mir159	Psat5g235280.1	AT3G29750.1	| Symbols: | Eukaryotic aspartyl protease family protein | chr3:11579125-11580600 REVERSE LENGTH=421	1e-10
chr6LG2_275075851_275076139	mir159	Psat5g240600.3	No hits found
chr6LG2_275075851_275076139	mir159	Psat5g240600.4	No hits found
chr6LG2_275075851_275076139	mir159	Psat5g211160.1	AT5G06100.1	| Symbols: MYB33, ATMYB33 | myb domain protein 33 | chr5:1838555-1839997 FORWARD LENGTH=451	4e-19
chr6LG2_275075851_275076139	mir159	Psat5g240600.2	No hits found
chr6LG2_275075851_275076139	mir159	Psat0s91g0080.1	No hits found
chr6LG2_275075851_275076139	mir159	Psat5g240600.1	No hits found
chr6LG2_275075851_275076139	mir159	Psat5g210080.1	AT5G06100.1	| Symbols: MYB33, ATMYB33 | myb domain protein 33 | chr5:1838555-1839997 FORWARD LENGTH=451	2e-65
chr6LG2_275075851_275076139	mir159	Psat7g134880.1	AT5G15310.2	| Symbols: ATMYB16, ATMIXTA, MYB16 | myb domain protein 16 | chr5:4974894-4976106 FORWARD LENGTH=315	6e-99
chr6LG2_275075851_275076139	mir159	Psat6g141840.1	AT5G63930.1	| Symbols: | Leucine-rich repeat protein kinase family protein | chr5:25583006-25586392 FORWARD LENGTH=1102	0
chr6LG2_275075851_275076139	mir159	Psat6g131600.1	No hits found
chr6LG2_275075851_275076139	mir159	Psat6g131600.2	No hits found
chr6LG2_275075851_275076139	mir159	Psat5g160320.1	No hits found
chr6LG2_316896989_316897189	mir408	Psat5g030200.1	AT5G21930.2	| Symbols: PAA2, HMA8 | P-type ATPase of Arabidopsis 2 | chr5:7243129-7248721 FORWARD LENGTH=883	0
chr6LG2_316896989_316897189	mir408	Psat7g061200.1	AT2G02850.1	| Symbols: ARPN | plantacyanin | chr2:826630-827720 REVERSE LENGTH=129	4e-28
chr6LG2_316896989_316897189	mir408	Psat0s222g0080.1	No hits found
chr6LG2_316896989_316897189	mir408	Psat1g136200.1	AT2G02850.1	| Symbols: ARPN | plantacyanin | chr2:826630-827720 REVERSE LENGTH=129	1e-20
chr6LG2_316896989_316897189	mir408	Psat1g136360.1	AT2G02850.1	| Symbols: ARPN | plantacyanin | chr2:826630-827720 REVERSE LENGTH=129	1e-19
chr6LG2_316896989_316897189	mir408	Psat0s4837g0200.1	No hits found
chr6LG2_316896989_316897189	mir408	Psat5g174320.1	AT1G50640.1	| Symbols: ERF3, ATERF3 | ethylene responsive element binding factor 3 | chr1:18757602-18758279 REVERSE LENGTH=225	2e-51
chr6LG2_328900018_328900134	mir164	Psat1g002400.1	AT1G56010.2	| Symbols: NAC1, ANAC022 | NAC domain containing protein 1 | chr1:20946852-20949144 REVERSE LENGTH=324	1e-128
chr6LG2_328900018_328900134	mir164	Psat4g050600.1	AT5G61430.1	| Symbols: ANAC100, ATNAC5, NAC100 | NAC domain containing protein 100 | chr5:24701328-24702553 REVERSE LENGTH=336	1e-144
chr6LG2_328900018_328900134	mir164	Psat0s2051g0040.1	AT5G53950.1	| Symbols: CUC2, ANAC098, ATCUC2 | NAC (No Apical Meristem) domain transcriptional regulator superfamily protein| chr5:21901966-21903795 REVERSE LENGTH=375	3e-119
chr6LG2_328900018_328900134	mir164	Psat0s5198g0040.1	AT5G53950.1	| Symbols: CUC2, ANAC098, ATCUC2 | NAC (No Apical Meristem) domain transcriptional regulator superfamily protein| chr5:21901966-21903795 REVERSE LENGTH=375	3e-82
chr6LG2_328900018_328900134	mir164	Psat5g193920.1	AT5G61430.1	| Symbols: ANAC100, ATNAC5, NAC100 | NAC domain containing protein 100 | chr5:24701328-24702553 REVERSE LENGTH=336	5e-118
chr6LG2_328900018_328900134	mir164	Psat4g158840.1	AT4G12740.1	| Symbols: | HhH-GPD base excision DNA repair family protein | chr4:7494578-7497596 REVERSE LENGTH=630	2e-164
chr6LG2_328900018_328900134	mir164	Psat4g158840.2	AT4G12740.1	| Symbols: | HhH-GPD base excision DNA repair family protein | chr4:7494578-7497596 REVERSE LENGTH=630	6e-148
chr6LG2_328900018_328900134	mir164	Psat0ss777g0120.1	No hits found
chr6LG2_328900018_328900134	mir164	Psat7g176440.1	AT3G13530.1	| Symbols: MAPKKK7, MAP3KE1 | mitogen-activated protein kinase kinase kinase 7 | chr3:4411934-4419320 REVERSE LENGTH=1368	0
chr6LG2_328900018_328900134	mir164	Psat7g111280.1	AT1G61240.4	| Symbols: | Protein of unknown function (DUF707) | chr1:22582537-22585050 FORWARD LENGTH=425	2e-170
chr6LG2_328900018_328900134	mir164	Psat7g111280.5	AT1G61240.4	| Symbols: | Protein of unknown function (DUF707) | chr1:22582537-22585050 FORWARD LENGTH=425	4e-154
chr6LG2_328900018_328900134	mir164	Psat7g111280.4	AT1G11170.1	| Symbols: | Protein of unknown function (DUF707) | chr1:3741724-3744459 FORWARD LENGTH=438	1e-151
chr6LG2_328900018_328900134	mir164	Psat7g111280.3	AT1G11170.1	| Symbols: | Protein of unknown function (DUF707) | chr1:3741724-3744459 FORWARD LENGTH=438	1e-151
chr6LG2_328900018_328900134	mir164	Psat7g111280.2	AT1G11170.1	| Symbols: | Protein of unknown function (DUF707) | chr1:3741724-3744459 FORWARD LENGTH=438	7e-153
chr6LG2_328900018_328900134	mir164	Psat2g085400.1	AT4G38050.1	| Symbols: | Xanthine/uracil permease family protein | chr4:17869529-17872461 REVERSE LENGTH=709	2e-12
chr6LG2_370932764_370932849	mir160	Psat5g135840.1	AT1G77850.1	| Symbols: ARF17 | auxin response factor 17 | chr1:29272405-29275193 FORWARD LENGTH=585	9e-164
chr6LG2_370932764_370932849	mir160	Psat5g135840.2	AT1G77850.1	| Symbols: ARF17 | auxin response factor 17 | chr1:29272405-29275193 FORWARD LENGTH=585	9e-164
chr6LG2_370932764_370932849	mir160	Psat6g070800.2	AT4G30080.1	| Symbols: ARF16 | auxin response factor 16 | chr4:14703369-14705564 REVERSE LENGTH=670	0
chr6LG2_370932764_370932849	mir160	Psat6g070800.1	AT4G30080.1	| Symbols: ARF16 | auxin response factor 16 | chr4:14703369-14705564 REVERSE LENGTH=670	0
chr6LG2_370932764_370932849	mir160	Psat7g218280.1	AT4G30080.1	| Symbols: ARF16 | auxin response factor 16 | chr4:14703369-14705564 REVERSE LENGTH=670	1e-17
chr6LG2_370932764_370932849	mir160	Psat3g042920.1	AT4G30080.1	| Symbols: ARF16 | auxin response factor 16 | chr4:14703369-14705564 REVERSE LENGTH=670	9e-116
chr6LG2_370932764_370932849	mir160	Psat3g043080.1	AT4G30080.1	| Symbols: ARF16 | auxin response factor 16 | chr4:14703369-14705564 REVERSE LENGTH=670	2e-159
chr6LG2_370932764_370932849	mir160	Psat5g210680.1	AT4G30080.1	| Symbols: ARF16 | auxin response factor 16 | chr4:14703369-14705564 REVERSE LENGTH=670	2e-125
chr6LG2_370932764_370932849	mir160	Psat5g210640.1	No hits found
chr6LG2_370932764_370932849	mir160	Psat3g043840.1	AT4G30080.1	| Symbols: ARF16 | auxin response factor 16 | chr4:14703369-14705564 REVERSE LENGTH=670	9e-141
chr6LG2_370932764_370932849	mir160	Psat3g042800.1	AT4G30080.1	| Symbols: ARF16 | auxin response factor 16 | chr4:14703369-14705564 REVERSE LENGTH=670	9e-132
chr6LG2_370932764_370932849	mir160	Psat6g183360.1	AT4G30080.1	| Symbols: ARF16 | auxin response factor 16 | chr4:14703369-14705564 REVERSE LENGTH=670	0
chr6LG2_370932764_370932849	mir160	Psat5g280080.2	AT4G30080.1	| Symbols: ARF16 | auxin response factor 16 | chr4:14703369-14705564 REVERSE LENGTH=670	0
chr6LG2_370932764_370932849	mir160	Psat5g280080.1	AT2G28350.1	| Symbols: ARF10 | auxin response factor 10 | chr2:12114331-12116665 FORWARD LENGTH=693	0
chr6LG2_370932764_370932849	mir160	Psat5g054120.1	AT4G30080.1	| Symbols: ARF16 | auxin response factor 16 | chr4:14703369-14705564 REVERSE LENGTH=670	1e-107
chr6LG2_370932764_370932849	mir160	Psat3g043720.1	AT4G30080.1	| Symbols: ARF16 | auxin response factor 16 | chr4:14703369-14705564 REVERSE LENGTH=670	8e-98
chr6LG2_370932764_370932849	mir160	Psat3g042760.1	AT4G30080.1	| Symbols: ARF16 | auxin response factor 16 | chr4:14703369-14705564 REVERSE LENGTH=670	1e-117
chr6LG2_370932764_370932849	mir160	Psat3g042760.2	AT4G30080.1	| Symbols: ARF16 | auxin response factor 16 | chr4:14703369-14705564 REVERSE LENGTH=670	1e-117
chr6LG2_370932764_370932849	mir160	Psat0s3594g0040.1	AT2G28350.1	| Symbols: ARF10 | auxin response factor 10 | chr2:12114331-12116665 FORWARD LENGTH=693	0
chr6LG2_370932764_370932849	mir160	Psat3g042840.1	AT4G30080.1	| Symbols: ARF16 | auxin response factor 16 | chr4:14703369-14705564 REVERSE LENGTH=670	5e-26
chr6LG2_370932764_370932849	mir160	Psat5g054160.1	AT4G30080.1	| Symbols: ARF16 | auxin response factor 16 | chr4:14703369-14705564 REVERSE LENGTH=670	2e-95
chr6LG2_370932764_370932849	mir160	Psat0s5865g0120.1	AT1G77850.1	| Symbols: ARF17 | auxin response factor 17 | chr1:29272405-29275193 FORWARD LENGTH=585	5e-75
chr6LG2_370932764_370932849	mir160	Psat2g034920.1	AT1G77850.1	| Symbols: ARF17 | auxin response factor 17 | chr1:29272405-29275193 FORWARD LENGTH=585	5e-84
chr6LG2_370932764_370932849	mir160	Psat4g150840.1	No hits found
chr6LG2_400226148_400226269	mir399	Psat2g062320.1	AT5G43360.1	| Symbols: PHT3, ATPT4, PHT1;3 | phosphate transporter 1;3 | chr5:17409524-17411214 FORWARD LENGTH=521	0
chr6LG2_400226148_400226269	mir399	Psat5g078080.2	AT5G53450.1	| Symbols: ORG1 | OBP3-responsive gene 1 | chr5:21689204-21692242 FORWARD LENGTH=670	0
chr6LG2_400226148_400226269	mir399	Psat5g078080.1	AT5G53450.1	| Symbols: ORG1 | OBP3-responsive gene 1 | chr5:21689204-21692242 FORWARD LENGTH=670	0
chr6LG2_400226148_400226269	mir399	Psat3g174720.1	AT3G27060.1	| Symbols: TSO2, ATTSO2 | Ferritin/ribonucleotide reductase-like family protein | chr3:9979971-9981057 REVERSE LENGTH=332	0
chr6LG2_400226148_400226269	mir399	Psat2g057760.1	AT3G54700.1	| Symbols: PHT1;7 | phosphate transporter 1;7 | chr3:20248463-20250070 REVERSE LENGTH=535	2e-123
chr6LG2_438237322_438237574	mir159	Psat1g188440.1	AT4G18390.2	| Symbols: TCP2 | TEOSINTE BRANCHED 1, cycloidea and PCF transcription factor 2 | chr4:10163212-10164309 REVERSE LENGTH=365	4e-46
chr6LG2_438237322_438237574	mir159	Psat0s1198g0040.3	AT4G18390.2	| Symbols: TCP2 | TEOSINTE BRANCHED 1, cycloidea and PCF transcription factor 2 | chr4:10163212-10164309 REVERSE LENGTH=365	1e-71
chr6LG2_438237322_438237574	mir159	Psat0s1198g0040.1	AT4G18390.2	| Symbols: TCP2 | TEOSINTE BRANCHED 1, cycloidea and PCF transcription factor 2 | chr4:10163212-10164309 REVERSE LENGTH=365	1e-71
chr6LG2_438237322_438237574	mir159	Psat0s1198g0040.2	AT4G18390.2	| Symbols: TCP2 | TEOSINTE BRANCHED 1, cycloidea and PCF transcription factor 2 | chr4:10163212-10164309 REVERSE LENGTH=365	1e-71
chr6LG2_438237322_438237574	mir159	Psat5g274920.1	AT3G15030.3	| Symbols: TCP4 | TCP family transcription factor 4 | chr3:5062308-5063570 FORWARD LENGTH=420	2e-49
chr6LG2_438237322_438237574	mir159	Psat5g240240.1	AT3G15030.3	| Symbols: TCP4 | TCP family transcription factor 4 | chr3:5062308-5063570 FORWARD LENGTH=420	3e-71
chr6LG2_438237322_438237574	mir159	Psat4g170920.1	AT1G53230.1	| Symbols: TCP3 | TEOSINTE BRANCHED 1, cycloidea and PCF transcription factor 3 | chr1:19850260-19851435 REVERSE LENGTH=391	2e-97
chr6LG2_438237322_438237574	mir159	Psat1g200600.1	No hits found
chr6LG2_438237322_438237574	mir159	Psat2g124400.2	AT3G17900.1	| Symbols: | unknown protein; FUNCTIONS IN: molecular_function unknown; INVOLVED IN: biological_process unknown;LOCATED IN: cellular_component unknown; EXPRESSED IN: 23 plant structures; EXPRESSED DURING: 13 growth stages; Has 45 Blast hits to 44 proteins in 14 species: Archae - 0; Bacteria- 0; Metazoa - 2; Fungi - 2; Plants - 39; Viruses - 0;Other Eukaryotes - 2 (source: NCBI BLink). | chr3:6128…	0
chr6LG2_438237322_438237574	mir159	Psat2g124400.1	AT3G17900.1	| Symbols: | unknown protein; FUNCTIONS IN: molecular_function unknown; INVOLVED IN: biological_process unknown;LOCATED IN: cellular_component unknown; EXPRESSED IN: 23 plant structures; EXPRESSED DURING: 13 growth stages; Has 45 Blast hits to 44 proteins in 14 species: Archae - 0; Bacteria- 0; Metazoa - 2; Fungi - 2; Plants - 39; Viruses - 0;Other Eukaryotes - 2 (source: NCBI BLink). | chr3:6128…	0
chr6LG2_440904006_440904175	mir482	Psat5g213520.1	AT3G14470.1	| Symbols: | NB-ARC domain-containing disease resistance protein | chr3:4857940-4861104 FORWARD LENGTH=1054	4e-72
chr6LG2_440904006_440904175	mir482	Psat1g036840.1	AT3G14470.1	| Symbols: | NB-ARC domain-containing disease resistance protein | chr3:4857940-4861104 FORWARD LENGTH=1054	2e-87
chr7LG7_9428632_9428801	mir156	Psat3g164360.1	AT5G50570.2	| Symbols: SPL13A, SPL13 | Squamosa promoter-binding protein-like (SBP domain) transcription factor family protein| chr5:20582555-20583791 REVERSE LENGTH=359	4e-43
chr7LG7_9428632_9428801	mir156	Psat3g164360.2	AT5G50570.2	| Symbols: SPL13A, SPL13 | Squamosa promoter-binding protein-like (SBP domain) transcription factor family protein| chr5:20582555-20583791 REVERSE LENGTH=359	4e-43
chr7LG7_9428632_9428801	mir156	Psat6g101960.1	AT2G42200.1	| Symbols: SPL9, AtSPL9 | squamosa promoter binding protein-like 9 | chr2:17587601-17589451 FORWARD LENGTH=375	2e-54
chr7LG7_9428632_9428801	mir156	Psat3g069560.1	AT2G42200.1	| Symbols: SPL9, AtSPL9 | squamosa promoter binding protein-like 9 | chr2:17587601-17589451 FORWARD LENGTH=375	5e-65
chr7LG7_9428632_9428801	mir156	Psat5g096720.2	AT5G43270.1	| Symbols: SPL2 | squamosa promoter binding protein-like 2 | chr5:17360527-17362143 REVERSE LENGTH=419	3e-59
chr7LG7_9428632_9428801	mir156	Psat5g096720.3	AT5G43270.1	| Symbols: SPL2 | squamosa promoter binding protein-like 2 | chr5:17360527-17362143 REVERSE LENGTH=419	3e-59
chr7LG7_9428632_9428801	mir156	Psat5g096720.1	AT5G43270.1	| Symbols: SPL2 | squamosa promoter binding protein-like 2 | chr5:17360527-17362143 REVERSE LENGTH=419	3e-59
chr7LG7_9428632_9428801	mir156	Psat7g077080.1	AT5G43270.1	| Symbols: SPL2 | squamosa promoter binding protein-like 2 | chr5:17360527-17362143 REVERSE LENGTH=419	7e-54
chr7LG7_9428632_9428801	mir156	Psat7g077080.3	AT5G43270.1	| Symbols: SPL2 | squamosa promoter binding protein-like 2 | chr5:17360527-17362143 REVERSE LENGTH=419	7e-54
chr7LG7_9428632_9428801	mir156	Psat7g077080.2	AT5G43270.1	| Symbols: SPL2 | squamosa promoter binding protein-like 2 | chr5:17360527-17362143 REVERSE LENGTH=419	7e-54
chr7LG7_9428632_9428801	mir156	Psat5g096720.4	AT5G43270.1	| Symbols: SPL2 | squamosa promoter binding protein-like 2 | chr5:17360527-17362143 REVERSE LENGTH=419	7e-57
chr7LG7_9428632_9428801	mir156	Psat2g077800.2	No hits found
chr7LG7_9428632_9428801	mir156	Psat2g077800.3	No hits found
chr7LG7_9428632_9428801	mir156	Psat2g077800.1	No hits found
chr7LG7_9428632_9428801	mir156	Psat3g157680.1	AT1G27360.4	| Symbols: SPL11 | squamosa promoter-like 11 | chr1:9502139-9503715 FORWARD LENGTH=393	7e-38
chr7LG7_9428632_9428801	mir156	Psat5g052160.1	AT5G50570.2	| Symbols: SPL13A, SPL13 | Squamosa promoter-binding protein-like (SBP domain) transcription factor family protein| chr5:20582555-20583791 REVERSE LENGTH=359	1e-67
chr7LG7_9428632_9428801	mir156	Psat1g127000.1	AT1G69170.1	| Symbols: | Squamosa promoter-binding protein-like (SBP domain) transcription factor family protein | chr1:26005626-26007041 FORWARD LENGTH=405	9e-48
chr7LG7_9428632_9428801	mir156	Psat1g127000.2	AT1G69170.1	| Symbols: | Squamosa promoter-binding protein-like (SBP domain) transcription factor family protein | chr1:26005626-26007041 FORWARD LENGTH=405	9e-48
chr7LG7_9428632_9428801	mir156	Psat4g046440.2	AT1G69170.1	| Symbols: | Squamosa promoter-binding protein-like (SBP domain) transcription factor family protein | chr1:26005626-26007041 FORWARD LENGTH=405	4e-48
chr7LG7_9428632_9428801	mir156	Psat4g046440.1	AT1G69170.1	| Symbols: | Squamosa promoter-binding protein-like (SBP domain) transcription factor family protein | chr1:26005626-26007041 FORWARD LENGTH=405	4e-48
chr7LG7_9428632_9428801	mir156	Psat2g133080.1	AT1G69170.1	| Symbols: | Squamosa promoter-binding protein-like (SBP domain) transcription factor family protein | chr1:26005626-26007041 FORWARD LENGTH=405	4e-61
chr7LG7_9428632_9428801	mir156	Psat2g190200.1	AT1G76690.1	| Symbols: OPR2, ATOPR2 | 12-oxophytodienoate reductase 2 | chr1:28778976-28780355 FORWARD LENGTH=374	0
chr7LG7_9428632_9428801	mir156	Psat2g044760.6	AT2G01970.1	| Symbols: | Endomembrane protein 70 protein family | chr2:452197-454819 REVERSE LENGTH=592	0
chr7LG7_9428632_9428801	mir156	Psat2g044760.1	AT2G01970.1	| Symbols: | Endomembrane protein 70 protein family | chr2:452197-454819 REVERSE LENGTH=592	0
chr7LG7_9428632_9428801	mir156	Psat2g044760.5	AT2G01970.1	| Symbols: | Endomembrane protein 70 protein family | chr2:452197-454819 REVERSE LENGTH=592	0
chr7LG7_9428632_9428801	mir156	Psat2g044760.2	AT2G01970.1	| Symbols: | Endomembrane protein 70 protein family | chr2:452197-454819 REVERSE LENGTH=592	0
chr7LG7_9428632_9428801	mir156	Psat2g044760.3	AT2G01970.1	| Symbols: | Endomembrane protein 70 protein family | chr2:452197-454819 REVERSE LENGTH=592	0
chr7LG7_9428632_9428801	mir156	Psat2g044760.4	AT2G01970.1	| Symbols: | Endomembrane protein 70 protein family | chr2:452197-454819 REVERSE LENGTH=592	0
chr7LG7_9428632_9428801	mir156	Psat1g212600.2	AT5G64440.1	| Symbols: AtFAAH, FAAH | fatty acid amide hydrolase | chr5:25766229-25770260 FORWARD LENGTH=607	0
chr7LG7_9428632_9428801	mir156	Psat1g212600.1	AT5G64440.1	| Symbols: AtFAAH, FAAH | fatty acid amide hydrolase | chr5:25766229-25770260 FORWARD LENGTH=607	0
chr7LG7_9428632_9428801	mir156	Psat0s45g0040.1	AT1G48090.1	| Symbols: | calcium-dependent lipid-binding family protein | chr1:17732582-17758194 REVERSE LENGTH=4146	0
chr7LG7_9428632_9428801	mir156	Psat7g132840.2	AT5G08470.1	| Symbols: PEX1 | peroxisome 1 | chr5:2735925-2742731 FORWARD LENGTH=1130	0
chr7LG7_9428632_9428801	mir156	Psat5g175080.1	AT5G15280.1	| Symbols: | Pentatricopeptide repeat (PPR) superfamily protein | chr5:4962293-4965976 FORWARD LENGTH=1227	0
chr7LG7_9428632_9428801	mir156	Psat2g151880.1	AT4G35800.1	| Symbols: NRPB1, RPB1, RNA_POL_II_LSRNA_POL_II_LS, RNA_POL_II_LS | RNA polymerase II large subunit | chr4:16961115-16967892 REVERSE LENGTH=1839	0
chr7LG7_9428632_9428801	mir156	Psat3g055760.1	AT4G28600.1	| Symbols: NPGR2 | no pollen germination related 2 | chr4:14130046-14132599 FORWARD LENGTH=739	0
chr7LG7_9428632_9428801	mir156	Psat3g055760.3	AT4G28600.1	| Symbols: NPGR2 | no pollen germination related 2 | chr4:14130046-14132599 FORWARD LENGTH=739	0
chr7LG7_9428632_9428801	mir156	Psat3g055760.4	AT4G28600.1	| Symbols: NPGR2 | no pollen germination related 2 | chr4:14130046-14132599 FORWARD LENGTH=739	0
chr7LG7_9428632_9428801	mir156	Psat3g055760.2	AT4G28600.1	| Symbols: NPGR2 | no pollen germination related 2 | chr4:14130046-14132599 FORWARD LENGTH=739	0
chr7LG7_9428632_9428801	mir156	Psat1g171040.1	No hits found
chr7LG7_43481221_43481427	mir159	Psat1g188440.1	AT4G18390.2	| Symbols: TCP2 | TEOSINTE BRANCHED 1, cycloidea and PCF transcription factor 2 | chr4:10163212-10164309 REVERSE LENGTH=365	4e-46
chr7LG7_43481221_43481427	mir159	Psat0s1198g0040.2	AT4G18390.2	| Symbols: TCP2 | TEOSINTE BRANCHED 1, cycloidea and PCF transcription factor 2 | chr4:10163212-10164309 REVERSE LENGTH=365	1e-71
chr7LG7_43481221_43481427	mir159	Psat0s1198g0040.1	AT4G18390.2	| Symbols: TCP2 | TEOSINTE BRANCHED 1, cycloidea and PCF transcription factor 2 | chr4:10163212-10164309 REVERSE LENGTH=365	1e-71
chr7LG7_43481221_43481427	mir159	Psat0s1198g0040.3	AT4G18390.2	| Symbols: TCP2 | TEOSINTE BRANCHED 1, cycloidea and PCF transcription factor 2 | chr4:10163212-10164309 REVERSE LENGTH=365	1e-71
chr7LG7_43481221_43481427	mir159	Psat1g200600.1	No hits found
chr7LG7_43481221_43481427	mir159	Psat5g274920.1	AT3G15030.3	| Symbols: TCP4 | TCP family transcription factor 4 | chr3:5062308-5063570 FORWARD LENGTH=420	2e-49
chr7LG7_43481221_43481427	mir159	Psat5g240240.1	AT3G15030.3	| Symbols: TCP4 | TCP family transcription factor 4 | chr3:5062308-5063570 FORWARD LENGTH=420	3e-71
chr7LG7_43481221_43481427	mir159	Psat4g170920.1	AT1G53230.1	| Symbols: TCP3 | TEOSINTE BRANCHED 1, cycloidea and PCF transcription factor 3 | chr1:19850260-19851435 REVERSE LENGTH=391	2e-97
chr7LG7_43481221_43481427	mir159	Psat5g225360.3	AT5G06100.1	| Symbols: MYB33, ATMYB33 | myb domain protein 33 | chr5:1838555-1839997 FORWARD LENGTH=451	2e-93
chr7LG7_43481221_43481427	mir159	Psat4g188880.1	AT3G11440.1	| Symbols: ATMYB65, MYB65 | myb domain protein 65 | chr3:3603056-3604929 FORWARD LENGTH=553	2e-101
chr7LG7_43481221_43481427	mir159	Psat5g225360.1	AT3G11440.1	| Symbols: ATMYB65, MYB65 | myb domain protein 65 | chr3:3603056-3604929 FORWARD LENGTH=553	3e-101
chr7LG7_43481221_43481427	mir159	Psat5g225360.2	AT3G11440.1	| Symbols: ATMYB65, MYB65 | myb domain protein 65 | chr3:3603056-3604929 FORWARD LENGTH=553	3e-101
chr7LG7_43481221_43481427	mir159	Psat4g215160.1	AT3G61850.4	| Symbols: DAG1 | Dof-type zinc finger DNA-binding family protein | chr3:22895495-22897150 FORWARD LENGTH=324	4e-28
chr7LG7_380299466_380299593	mir171_1	Psat3g163480.1	AT4G00150.1	| Symbols: HAM3, ATHAM3, LOM3 | GRAS family transcription factor | chr4:57429-59105 REVERSE LENGTH=558	5e-140
chr7LG7_380299466_380299593	mir171_1	Psat7g236360.1	AT4G00150.1	| Symbols: HAM3, ATHAM3, LOM3 | GRAS family transcription factor | chr4:57429-59105 REVERSE LENGTH=558	2e-125
chr7LG7_380299466_380299593	mir171_1	Psat6g052800.1	AT1G10390.2	| Symbols: | Nucleoporin autopeptidase | chr1:3407265-3412045 REVERSE LENGTH=1041	0
chr7LG7_380299466_380299593	mir171_1	Psat6g052800.2	AT1G10390.2	| Symbols: | Nucleoporin autopeptidase | chr1:3407265-3412045 REVERSE LENGTH=1041	0
chr7LG7_380299466_380299593	mir171_1	Psat4g091760.1	AT4G36710.1	| Symbols: | GRAS family transcription factor | chr4:17306060-17307520 FORWARD LENGTH=486	2e-165
chr7LG7_380299466_380299593	mir171_1	Psat0s4221g0160.1	No hits found
chr7LG7_380299466_380299593	mir171_1	Psat4g126320.1	No hits found
chr7LG7_380299466_380299593	mir171_1	Psat4g071840.1	No hits found
chr7LG7_411821586_411821691	mir167_1	Psat5g229040.1	AT1G53000.1	| Symbols: KDSB | Nucleotide-diphospho-sugar transferases superfamily protein | chr1:19745330-19747133 REVERSE LENGTH=290	1e-174
chr7LG7_411821586_411821691	mir167_1	Psat2g167360.2	AT5G67030.1	| Symbols: ABA1, LOS6, NPQ2, ATABA1, ZEP, IBS3, ATZEP | zeaxanthin epoxidase (ZEP) (ABA1) | chr5:26753745-26757090 REVERSE LENGTH=667	0
chr7LG7_411821586_411821691	mir167_1	Psat2g167360.3	AT5G67030.1	| Symbols: ABA1, LOS6, NPQ2, ATABA1, ZEP, IBS3, ATZEP | zeaxanthin epoxidase (ZEP) (ABA1) | chr5:26753745-26757090 REVERSE LENGTH=667	0
chr7LG7_411821586_411821691	mir167_1	Psat2g167360.1	AT5G67030.1	| Symbols: ABA1, LOS6, NPQ2, ATABA1, ZEP, IBS3, ATZEP | zeaxanthin epoxidase (ZEP) (ABA1) | chr5:26753745-26757090 REVERSE LENGTH=667	0
chr7LG7_411821586_411821691	mir167_1	Psat3g108400.1	AT4G00450.1	| Symbols: CRP, CCT | RNA polymerase II transcription mediators | chr4:202425-210666 FORWARD LENGTH=2253	0
chr7LG7_411821586_411821691	mir167_1	Psat3g108400.2	AT4G00450.1	| Symbols: CRP, CCT | RNA polymerase II transcription mediators | chr4:202425-210666 FORWARD LENGTH=2253	0
chr7LG7_411821586_411821691	mir167_1	Psat3g108400.3	AT4G00450.1	| Symbols: CRP, CCT | RNA polymerase II transcription mediators | chr4:202425-210666 FORWARD LENGTH=2253	0
chr7LG7_411821586_411821691	mir167_1	Psat6g243600.1	AT2G31660.1	| Symbols: SAD2, URM9 | ARM repeat superfamily protein | chr2:13464519-13471353 FORWARD LENGTH=1040	0
chr7LG7_411821586_411821691	mir167_1	Psat6g029600.3	AT2G25530.1	| Symbols: | AFG1-like ATPase family protein | chr2:10863059-10866597 FORWARD LENGTH=655	0
chr7LG7_411821586_411821691	mir167_1	Psat6g029600.2	AT2G25530.1	| Symbols: | AFG1-like ATPase family protein | chr2:10863059-10866597 FORWARD LENGTH=655	0
chr7LG7_411821586_411821691	mir167_1	Psat6g029600.1	AT2G25530.1	| Symbols: | AFG1-like ATPase family protein | chr2:10863059-10866597 FORWARD LENGTH=655	0
chr7LG7_411821586_411821691	mir167_1	Psat7g078800.1	AT1G30330.2	| Symbols: ARF6 | auxin response factor 6 | chr1:10686125-10690036 REVERSE LENGTH=935	0
chr7LG7_411821586_411821691	mir167_1	Psat2g059600.1	AT2G38080.1	| Symbols: IRX12, LAC4, ATLMCO4, LMCO4 | Laccase/Diphenol oxidase family protein | chr2:15934540-15937352 FORWARD LENGTH=558	0
chr7LG7_411821586_411821691	mir167_1	Psat7g261320.1	AT4G31540.1	| Symbols: ATEXO70G1, EXO70G1 | exocyst subunit exo70 family protein G1 | chr4:15284739-15286802 REVERSE LENGTH=687	0
chr7LG7_411821586_411821691	mir167_1	Psat1g145480.1	AT4G29960.1	| Symbols: | unknown protein; FUNCTIONS IN: molecular_function unknown; INVOLVED IN: biological_process unknown;LOCATED IN: plasma membrane; EXPRESSED IN: 23 plant structures;EXPRESSED DURING: 15 growth stages; Has 30201 Blast hits to 17322 proteins in 780 species: Archae - 12; Bacteria- 1396; Metazoa - 17338; Fungi - 3422; Plants - 5037; Viruses- 0; Other Eukaryotes - 2996 (source: NCBI BLink). …	4e-96
chr7LG7_474875580_474875671	mir2111	Psat3g169800.1	AT3G27150.1	| Symbols: | Galactose oxidase/kelch repeat superfamily protein | chr3:10009692-10010960 REVERSE LENGTH=422	8e-137
chr7LG7_474875580_474875671	mir2111	Psat1g087960.1	AT3G27150.1	| Symbols: | Galactose oxidase/kelch repeat superfamily protein | chr3:10009692-10010960 REVERSE LENGTH=422	3e-122
chr7LG7_474875580_474875671	mir2111	Psat3g187520.1	AT2G31270.1	| Symbols: ATCDT1A, CDT1A, CDT1 | homolog of yeast CDT1 A | chr2:13329037-13331544 FORWARD LENGTH=571	7e-24
chr7LG7_474875580_474875671	mir2111	Psat6g001000.4	AT1G76130.1	| Symbols: ATAMY2, AMY2 | alpha-amylase-like 2 | chr1:28561647-28563914 FORWARD LENGTH=413	1e-162
chr7LG7_474875580_474875671	mir2111	Psat7g031800.2	AT1G63770.3	| Symbols: | Peptidase M1 family protein | chr1:23657791-23664243 REVERSE LENGTH=987	0
chr7LG7_474875580_474875671	mir2111	Psat7g031800.1	AT1G63770.3	| Symbols: | Peptidase M1 family protein | chr1:23657791-23664243 REVERSE LENGTH=987	0
chr7LG7_474875580_474875671	mir2111	Psat5g198440.1	AT5G07810.1	| Symbols: | SNF2 domain-containing protein / helicase domain-containing protein / HNH endonuclease domain-containing protein | chr5:2491412-2498484 REVERSE LENGTH=1190	0
chr7LG7_474875580_474875671	mir2111	Psat7g167560.3	AT5G44180.2	| Symbols: | Homeodomain-like transcriptional regulator | chr5:17783172-17789872 FORWARD LENGTH=1507	0
chr7LG7_474875580_474875671	mir2111	Psat7g167560.4	AT5G44180.1	| Symbols: | Homeodomain-like transcriptional regulator | chr5:17783172-17789872 FORWARD LENGTH=1694	0
chr7LG7_474875580_474875671	mir2111	Psat7g167560.2	AT5G44180.1	| Symbols: | Homeodomain-like transcriptional regulator | chr5:17783172-17789872 FORWARD LENGTH=1694	0
chr7LG7_474875580_474875671	mir2111	Psat7g167560.1	AT5G44180.1	| Symbols: | Homeodomain-like transcriptional regulator | chr5:17783172-17789872 FORWARD LENGTH=1694	0
chr7LG7_474875580_474875671	mir2111	Psat5g034920.1	AT2G26270.1	| Symbols: | FUNCTIONS IN: molecular_function unknown; INVOLVED IN: biological_process unknown; LOCATED IN:endomembrane system; BEST Arabidopsis thaliana protein match is: BRCT domain-containing DNA repair protein (TAIR:AT3G43930.1);Has 29 Blast hits to 29 proteins in 9 species: Archae- 0; Bacteria - 0; Metazoa - 0; Fungi - 0; Plants - 29; Viruses- 0; Other Eukaryotes - 0 (source: NCBI BLink). | …	3e-162
chr7LG7_474875580_474875671	mir2111	Psat5g034920.2	AT2G26270.1	| Symbols: | FUNCTIONS IN: molecular_function unknown; INVOLVED IN: biological_process unknown; LOCATED IN:endomembrane system; BEST Arabidopsis thaliana protein match is: BRCT domain-containing DNA repair protein (TAIR:AT3G43930.1);Has 29 Blast hits to 29 proteins in 9 species: Archae- 0; Bacteria - 0; Metazoa - 0; Fungi - 0; Plants - 29; Viruses- 0; Other Eukaryotes - 0 (source: NCBI BLink). | …	3e-162
chr7LG7_474875580_474875671	mir2111	Psat6g106320.1	AT3G12100.1	| Symbols: | Cation efflux family protein | chr3:3854741-3857270 REVERSE LENGTH=393	2e-66
chr7LG7_474875580_474875671	mir2111	Psat7g260600.1	AT1G51560.1	| Symbols: | Pyridoxamine 5'-phosphate oxidase family protein | chr1:19119900-19121859 REVERSE LENGTH=392	6e-121
chr7LG7_474875580_474875671	mir2111	Psat6g046440.5	AT1G68070.1	| Symbols: | Zinc finger, C3HC4 type (RING finger) family protein | chr1:25515412-25516767 REVERSE LENGTH=343	1e-172
chr7LG7_474875580_474875671	mir2111	Psat2g066000.1	AT5G49700.1	| Symbols: | Predicted AT-hook DNA-binding family protein | chr5:20192599-20193429 FORWARD LENGTH=276	1e-83
chr7LG7_474875580_474875671	mir2111	Psat7g005400.1	AT5G05560.1	| Symbols: EMB2771 | E3 ubiquitin ligase, putative | chr5:1641452-1654685 FORWARD LENGTH=1678	4e-41
chr7LG7_474875580_474875671	mir2111	Psat6g111880.1	AT5G08450.3	| Symbols: | FUNCTIONS IN: molecular_function unknown; INVOLVED IN: biological_process unknown; LOCATED IN:cellular_component unknown; EXPRESSED IN: 25 plant structures;EXPRESSED DURING: 15 growth stages; CONTAINS InterPro DOMAIN/s:Histone deacetylation protein Rxt3 (InterPro:IPR013951);Has 34444 Blast hits to 20801 proteins in 1175 species:Archae - 64; Bacteria - 2390; Metazoa - 15568; Fungi - 3…	0
chr7LG7_474875580_474875671	mir2111	Psat6g111880.2	AT5G08450.3	| Symbols: | FUNCTIONS IN: molecular_function unknown; INVOLVED IN: biological_process unknown; LOCATED IN:cellular_component unknown; EXPRESSED IN: 25 plant structures;EXPRESSED DURING: 15 growth stages; CONTAINS InterPro DOMAIN/s:Histone deacetylation protein Rxt3 (InterPro:IPR013951);Has 34444 Blast hits to 20801 proteins in 1175 species:Archae - 64; Bacteria - 2390; Metazoa - 15568; Fungi - 3…	0
chr7LG7_474875580_474875671	mir2111	Psat6g111880.3	AT5G08450.3	| Symbols: | FUNCTIONS IN: molecular_function unknown; INVOLVED IN: biological_process unknown; LOCATED IN:cellular_component unknown; EXPRESSED IN: 25 plant structures;EXPRESSED DURING: 15 growth stages; CONTAINS InterPro DOMAIN/s:Histone deacetylation protein Rxt3 (InterPro:IPR013951);Has 34444 Blast hits to 20801 proteins in 1175 species:Archae - 64; Bacteria - 2390; Metazoa - 15568; Fungi - 3…	0
chr7LG7_474875580_474875671	mir2111	Psat5g249640.2	AT5G54660.1	| Symbols: | HSP20-like chaperones superfamily protein | chr5:22203950-22204986 FORWARD LENGTH=192	4e-70
chr7LG7_474875580_474875671	mir2111	Psat7g049400.1	AT4G39370.3	| Symbols: UBP27 | ubiquitin-specific protease 27 | chr4:18306392-18308625 FORWARD LENGTH=505	5e-112
chr7LG7_474875580_474875671	mir2111	Psat4g032440.1	AT1G43760.1	| Symbols: | DNAse I-like superfamily protein | chr1:16528880-16531065 REVERSE LENGTH=626	1e-13
chr7LG7_474875580_474875671	mir2111	Psat5g120280.1	AT2G18510.1	| Symbols: emb2444 | RNA-binding (RRM/RBD/RNP motifs) family protein | chr2:8031554-8033517 REVERSE LENGTH=363	5e-162
chr7LG7_474875580_474875671	mir2111	Psat3g026680.1	AT5G06600.1	| Symbols: UBP12 | ubiquitin-specific protease 12 | chr5:2019545-2027834 REVERSE LENGTH=1116	2e-23
chr7LG7_474875580_474875671	mir2111	Psat0ss8330g0200.4	AT5G49470.3	| Symbols: | PAS domain-containing protein tyrosine kinase family protein | chr5:20063616-20068311 FORWARD LENGTH=770	0
chr7LG7_474875580_474875671	mir2111	Psat0ss8330g0200.5	AT5G49470.3	| Symbols: | PAS domain-containing protein tyrosine kinase family protein | chr5:20063616-20068311 FORWARD LENGTH=770	0
chr7LG7_474875580_474875671	mir2111	Psat0ss8330g0200.3	AT5G49470.3	| Symbols: | PAS domain-containing protein tyrosine kinase family protein | chr5:20063616-20068311 FORWARD LENGTH=770	0
chr7LG7_474875580_474875671	mir2111	Psat4g082840.1	AT1G68890.1	| Symbols: | magnesium ion binding;thiamin pyrophosphate binding;hydro-lyases;catalytics;2-succinyl-5-enolpyruvyl-6-hydroxy-3-cyclohexene-1-carboxylic-acid synthases |chr1:25896988-25906553 FORWARD LENGTH=1715	1e-113
chr7LG7_474875580_474875671	mir2111	Psat7g028040.1	AT1G68890.1	| Symbols: | magnesium ion binding;thiamin pyrophosphate binding;hydro-lyases;catalytics;2-succinyl-5-enolpyruvyl-6-hydroxy-3-cyclohexene-1-carboxylic-acid synthases |chr1:25896988-25906553 FORWARD LENGTH=1715	8e-136
chr7LG7_474875580_474875671	mir2111	Psat2g052880.1	AT1G68890.1	| Symbols: | magnesium ion binding;thiamin pyrophosphate binding;hydro-lyases;catalytics;2-succinyl-5-enolpyruvyl-6-hydroxy-3-cyclohexene-1-carboxylic-acid synthases |chr1:25896988-25906553 FORWARD LENGTH=1715	2e-72
chr7LG7_474875580_474875671	mir2111	Psat4g113520.1	AT1G68890.1	| Symbols: | magnesium ion binding;thiamin pyrophosphate binding;hydro-lyases;catalytics;2-succinyl-5-enolpyruvyl-6-hydroxy-3-cyclohexene-1-carboxylic-acid synthases |chr1:25896988-25906553 FORWARD LENGTH=1715	0
chr7LG7_474875580_474875671	mir2111	Psat5g048720.1	No hits found
chr7LG7_474875580_474875671	mir2111	Psat1g207800.1	AT1G11190.1	| Symbols: BFN1, ENDO1 | bifunctional nuclease i | chr1:3750338-3752696 REVERSE LENGTH=305	4e-148
chr7LG7_479657739_479657882	mir390	Psat3g142120.1	AT5G48940.1	| Symbols: | Leucine-rich repeat transmembrane protein kinase family protein | chr5:19839785-19843744 FORWARD LENGTH=1135	0
scaffold00485_99140_99293	mir394	Psat5g096960.1	AT1G27340.1	| Symbols: | Galactose oxidase/kelch repeat superfamily protein | chr1:9495741-9497857 FORWARD LENGTH=467	0
scaffold00485_99140_99293	mir394	Psat7g135960.1	AT5G39660.2	| Symbols: CDF2 | cycling DOF factor 2 | chr5:15878920-15880712 FORWARD LENGTH=457	1e-84
scaffold00485_99140_99293	mir394	Psat7g135960.3	AT5G39660.2	| Symbols: CDF2 | cycling DOF factor 2 | chr5:15878920-15880712 FORWARD LENGTH=457	5e-80
scaffold00485_99140_99293	mir394	Psat7g135960.2	AT3G47500.1	| Symbols: CDF3 | cycling DOF factor 3 | chr3:17504276-17505964 REVERSE LENGTH=448	5e-67
scaffold00485_99140_99293	mir394	Psat2g175480.1	AT4G17620.1	| Symbols: | glycine-rich protein | chr4:9822005-9824859 FORWARD LENGTH=544	0
scaffold00485_99140_99293	mir394	Psat7g097440.1	AT5G64550.1	| Symbols: | loricrin-related | chr5:25801794-25803698 REVERSE LENGTH=634	0
scaffold00485_99140_99293	mir394	Psat4g004200.1	AT1G62330.1	| Symbols: | O-fucosyltransferase family protein | chr1:23046965-23050053 FORWARD LENGTH=652	0
scaffold00485_99140_99293	mir394	Psat5g121480.1	AT4G05460.1	| Symbols: | RNI-like superfamily protein | chr4:2761106-2762400 REVERSE LENGTH=302	2e-61
scaffold00485_99140_99293	mir394	Psat1g197760.2	AT3G58670.3	| Symbols: | Protein of unknown function (DUF1637) | chr3:21703693-21705314 REVERSE LENGTH=242	1e-93
scaffold00485_99140_99293	mir394	Psat1g197760.1	AT3G58670.3	| Symbols: | Protein of unknown function (DUF1637) | chr3:21703693-21705314 REVERSE LENGTH=242	1e-93
scaffold00485_99140_99293	mir394	Psat7g193080.1	AT4G15180.1	| Symbols: SDG2, ATXR3 | SET domain protein 2 | chr4:8651999-8662178 FORWARD LENGTH=2335	0
scaffold00485_99140_99293	mir394	Psat7g193080.2	AT4G15180.1	| Symbols: SDG2, ATXR3 | SET domain protein 2 | chr4:8651999-8662178 FORWARD LENGTH=2335	0
scaffold00590_97646_97747	mir2111	Psat4g037680.1	AT1G02630.1	| Symbols: | Nucleoside transporter family protein | chr1:561007-562382 REVERSE LENGTH=389	8e-177
scaffold00590_97646_97747	mir2111	Psat3g203240.1	AT4G01570.1	| Symbols: | Tetratricopeptide repeat (TPR)-like superfamily protein | chr4:679487-681904 FORWARD LENGTH=805	0
scaffold00590_97646_97747	mir2111	Psat0s305g0040.2	AT2G25010.1	| Symbols: | Aminotransferase-like, plant mobile domain family protein | chr2:10631691-10633547 FORWARD LENGTH=509	5e-23
scaffold00590_97646_97747	mir2111	Psat6g062560.1	AT2G20370.1	| Symbols: KAM1, MUR3 | Exostosin family protein | chr2:8792355-8794214 FORWARD LENGTH=619	0
scaffold00590_97646_97747	mir2111	Psat5g286760.3	AT3G46590.2	| Symbols: TRFL1, ATTRP2 | TRF-like 1 | chr3:17153642-17155946 FORWARD LENGTH=553	1e-47
scaffold00590_97646_97747	mir2111	Psat5g286760.4	AT3G12560.1	| Symbols: TRFL9, ATTBP2 | TRF-like 9 | chr3:3982272-3984848 REVERSE LENGTH=619	6e-88
scaffold00590_97646_97747	mir2111	Psat5g286760.1	AT3G12560.1	| Symbols: TRFL9, ATTBP2 | TRF-like 9 | chr3:3982272-3984848 REVERSE LENGTH=619	2e-119
scaffold00590_97646_97747	mir2111	Psat5g286760.2	AT3G12560.1	| Symbols: TRFL9, ATTBP2 | TRF-like 9 | chr3:3982272-3984848 REVERSE LENGTH=619	2e-119
scaffold00590_97646_97747	mir2111	Psat5g286760.5	AT3G12560.1	| Symbols: TRFL9, ATTBP2 | TRF-like 9 | chr3:3982272-3984848 REVERSE LENGTH=619	2e-119
scaffold00590_97646_97747	mir2111	Psat6g104080.1	AT4G14750.1	| Symbols: IQD19 | IQ-domain 19 | chr4:8470449-8471903 FORWARD LENGTH=387	1e-89
scaffold00590_97646_97747	mir2111	Psat2g141720.1	No hits found
scaffold00590_97646_97747	mir2111	Psat0s3766g0120.1	AT4G33990.1	| Symbols: EMB2758 | Tetratricopeptide repeat (TPR)-like superfamily protein | chr4:16290141-16292612 REVERSE LENGTH=823	2e-37
scaffold00590_97646_97747	mir2111	Psat1g051720.1	AT4G33990.1	| Symbols: EMB2758 | Tetratricopeptide repeat (TPR)-like superfamily protein | chr4:16290141-16292612 REVERSE LENGTH=823	2e-130
scaffold00590_97646_97747	mir2111	Psat3g080720.1	AT4G33990.1	| Symbols: EMB2758 | Tetratricopeptide repeat (TPR)-like superfamily protein | chr4:16290141-16292612 REVERSE LENGTH=823	0
scaffold00590_255548_255651	mir2111-m	Psat5g267760.1	AT4G19860.1	| Symbols: | alpha/beta-Hydrolases superfamily protein | chr4:10777655-10780260 REVERSE LENGTH=535	7e-11
scaffold00590_255548_255651	mir2111-m	Psat3g078560.1	No hits found
scaffold00590_255548_255651	mir2111-m	Psat5g219160.1	No hits found
scaffold00590_255548_255651	mir2111-m	Psat5g219240.1	AT3G14470.1	| Symbols: | NB-ARC domain-containing disease resistance protein | chr3:4857940-4861104 FORWARD LENGTH=1054	4e-149
scaffold00659_125906_126005	mir167_1	Psat0s3082g0040.1	AT3G14350.1	| Symbols: SRF7 | STRUBBELIG-receptor family 7 | chr3:4783115-4786999 REVERSE LENGTH=717	0
scaffold00659_125906_126005	mir167_1	Psat1g004040.1	AT3G14350.2	| Symbols: SRF7 | STRUBBELIG-receptor family 7 | chr3:4783115-4786397 REVERSE LENGTH=680	8e-106
scaffold00659_125906_126005	mir167_1	Psat5g229040.1	AT1G53000.1	| Symbols: KDSB | Nucleotide-diphospho-sugar transferases superfamily protein | chr1:19745330-19747133 REVERSE LENGTH=290	1e-174
scaffold00659_125906_126005	mir167_1	Psat1g168640.1	AT3G54950.1	| Symbols: PLP7, PLA IIIA | patatin-like protein 6 | chr3:20359076-20360774 REVERSE LENGTH=488	1e-137
scaffold00659_125906_126005	mir167_1	Psat7g142800.1	AT2G05990.2	| Symbols: MOD1, ENR1 | NAD(P)-binding Rossmann-fold superfamily protein | chr2:2322876-2324867 FORWARD LENGTH=390	3e-67
scaffold00659_125906_126005	mir167_1	Psat4g072520.1	AT4G16650.1	| Symbols: | O-fucosyltransferase family protein | chr4:9372727-9375910 FORWARD LENGTH=549	0
scaffold00659_125906_126005	mir167_1	Psat7g019880.1	AT2G19600.1	| Symbols: ATKEA4, KEA4 | K+ efflux antiporter 4 | chr2:8479275-8483482 FORWARD LENGTH=592	0
scaffold00659_125906_126005	mir167_1	Psat7g019880.2	AT2G19600.1	| Symbols: ATKEA4, KEA4 | K+ efflux antiporter 4 | chr2:8479275-8483482 FORWARD LENGTH=592	0
scaffold00659_125906_126005	mir167_1	Psat2g059600.1	AT2G38080.1	| Symbols: IRX12, LAC4, ATLMCO4, LMCO4 | Laccase/Diphenol oxidase family protein | chr2:15934540-15937352 FORWARD LENGTH=558	0
scaffold00659_125906_126005	mir167_1	Psat7g112840.1	AT4G04920.2	| Symbols: SFR6 | sensitive to freezing 6 | chr4:2497931-2504996 FORWARD LENGTH=1267	0
scaffold00659_125906_126005	mir167_1	Psat3g089480.1	AT5G18230.1	| Symbols: | transcription regulator NOT2/NOT3/NOT5 family protein | chr5:6021610-6027031 REVERSE LENGTH=843	0
scaffold00659_125906_126005	mir167_1	Psat3g089480.2	AT5G18230.1	| Symbols: | transcription regulator NOT2/NOT3/NOT5 family protein | chr5:6021610-6027031 REVERSE LENGTH=843	0
scaffold00929_26933_27082	mir5037	Psat4g064800.1	AT1G66350.1	| Symbols: RGL1, RGL | RGA-like 1 | chr1:24748327-24749862 FORWARD LENGTH=511	3e-74
scaffold00929_26933_27082	mir5037	Psat5g001640.1	AT5G27740.1	| Symbols: EMB161, EMB2775, EMB251, RFC3 | ATPase family associated with various cellular activities (AAA) |chr5:9823831-9826869 FORWARD LENGTH=354	2e-45
scaffold00929_26933_27082	mir5037	Psat4g160120.1	AT4G01070.1	| Symbols: GT72B1, UGT72B1 | UDP-Glycosyltransferase superfamily protein | chr4:461858-463300 REVERSE LENGTH=480	0
scaffold00929_26933_27082	mir5037	Psat0s2426g0040.1	AT1G11090.1	| Symbols: | alpha/beta-Hydrolases superfamily protein | chr1:3702655-3703629 FORWARD LENGTH=324	3e-144
scaffold00929_26933_27082	mir5037	Psat2g088320.1	AT3G15020.2	| Symbols: mMDH2 | Lactate/malate dehydrogenase family protein | chr3:5056139-5057865 FORWARD LENGTH=316	1e-96
scaffold00929_26933_27082	mir5037	Psat5g001640.1	AT5G27740.1	| Symbols: EMB161, EMB2775, EMB251, RFC3 | ATPase family associated with various cellular activities (AAA) |chr5:9823831-9826869 FORWARD LENGTH=354	2e-45
scaffold00929_26933_27082	mir5037	Psat0s2363g0160.1	AT5G12080.3	| Symbols: MSL10, ATMSL10 | mechanosensitive channel of small conductance-like 10 | chr5:3898182-3900923 REVERSE LENGTH=734	0
scaffold00929_26933_27082	mir5037	Psat2g016000.1	AT2G42920.1	| Symbols: | Pentatricopeptide repeat (PPR-like) superfamily protein | chr2:17858705-17860384 FORWARD LENGTH=559	0
scaffold00929_26933_27082	mir5037	Psat5g308000.1	AT1G80840.1	| Symbols: WRKY40, ATWRKY40 | WRKY DNA-binding protein 40 | chr1:30383834-30385356 FORWARD LENGTH=302	4e-95
scaffold00929_26933_27082	mir5037	Psat7g108240.1	AT5G63020.1	| Symbols: | Disease resistance protein (CC-NBS-LRR class) family | chr5:25283252-25286002 REVERSE LENGTH=888	1e-138
scaffold00929_26933_27082	mir5037	Psat4g024000.1	No hits found
scaffold00929_26933_27082	mir5037	Psat5g001640.1	AT5G27740.1	| Symbols: EMB161, EMB2775, EMB251, RFC3 | ATPase family associated with various cellular activities (AAA) |chr5:9823831-9826869 FORWARD LENGTH=354	2e-45
scaffold01820_10822_10920	mir160	Psat5g135840.1	AT1G77850.1	| Symbols: ARF17 | auxin response factor 17 | chr1:29272405-29275193 FORWARD LENGTH=585	9e-164
scaffold01820_10822_10920	mir160	Psat5g135840.2	AT1G77850.1	| Symbols: ARF17 | auxin response factor 17 | chr1:29272405-29275193 FORWARD LENGTH=585	9e-164
scaffold01820_10822_10920	mir160	Psat6g070800.2	AT4G30080.1	| Symbols: ARF16 | auxin response factor 16 | chr4:14703369-14705564 REVERSE LENGTH=670	0
scaffold01820_10822_10920	mir160	Psat6g070800.1	AT4G30080.1	| Symbols: ARF16 | auxin response factor 16 | chr4:14703369-14705564 REVERSE LENGTH=670	0
scaffold01820_10822_10920	mir160	Psat7g218280.1	AT4G30080.1	| Symbols: ARF16 | auxin response factor 16 | chr4:14703369-14705564 REVERSE LENGTH=670	1e-17
scaffold01820_10822_10920	mir160	Psat3g042920.1	AT4G30080.1	| Symbols: ARF16 | auxin response factor 16 | chr4:14703369-14705564 REVERSE LENGTH=670	9e-116
scaffold01820_10822_10920	mir160	Psat3g043080.1	AT4G30080.1	| Symbols: ARF16 | auxin response factor 16 | chr4:14703369-14705564 REVERSE LENGTH=670	2e-159
scaffold01820_10822_10920	mir160	Psat5g210680.1	AT4G30080.1	| Symbols: ARF16 | auxin response factor 16 | chr4:14703369-14705564 REVERSE LENGTH=670	2e-125
scaffold01820_10822_10920	mir160	Psat5g210640.1	No hits found
scaffold01820_10822_10920	mir160	Psat3g043840.1	AT4G30080.1	| Symbols: ARF16 | auxin response factor 16 | chr4:14703369-14705564 REVERSE LENGTH=670	9e-141
scaffold01820_10822_10920	mir160	Psat3g042800.1	AT4G30080.1	| Symbols: ARF16 | auxin response factor 16 | chr4:14703369-14705564 REVERSE LENGTH=670	9e-132
scaffold01820_10822_10920	mir160	Psat6g183360.1	AT4G30080.1	| Symbols: ARF16 | auxin response factor 16 | chr4:14703369-14705564 REVERSE LENGTH=670	0
scaffold01820_10822_10920	mir160	Psat5g280080.2	AT4G30080.1	| Symbols: ARF16 | auxin response factor 16 | chr4:14703369-14705564 REVERSE LENGTH=670	0
scaffold01820_10822_10920	mir160	Psat5g280080.1	AT2G28350.1	| Symbols: ARF10 | auxin response factor 10 | chr2:12114331-12116665 FORWARD LENGTH=693	0
scaffold01820_10822_10920	mir160	Psat5g054120.1	AT4G30080.1	| Symbols: ARF16 | auxin response factor 16 | chr4:14703369-14705564 REVERSE LENGTH=670	1e-107
scaffold01820_10822_10920	mir160	Psat3g043720.1	AT4G30080.1	| Symbols: ARF16 | auxin response factor 16 | chr4:14703369-14705564 REVERSE LENGTH=670	8e-98
scaffold01820_10822_10920	mir160	Psat3g042760.1	AT4G30080.1	| Symbols: ARF16 | auxin response factor 16 | chr4:14703369-14705564 REVERSE LENGTH=670	1e-117
scaffold01820_10822_10920	mir160	Psat3g042760.2	AT4G30080.1	| Symbols: ARF16 | auxin response factor 16 | chr4:14703369-14705564 REVERSE LENGTH=670	1e-117
scaffold01820_10822_10920	mir160	Psat0s3594g0040.1	AT2G28350.1	| Symbols: ARF10 | auxin response factor 10 | chr2:12114331-12116665 FORWARD LENGTH=693	0
scaffold01820_10822_10920	mir160	Psat3g042840.1	AT4G30080.1	| Symbols: ARF16 | auxin response factor 16 | chr4:14703369-14705564 REVERSE LENGTH=670	5e-26
scaffold01820_10822_10920	mir160	Psat5g054160.1	AT4G30080.1	| Symbols: ARF16 | auxin response factor 16 | chr4:14703369-14705564 REVERSE LENGTH=670	2e-95
scaffold01820_10822_10920	mir160	Psat0s5865g0120.1	AT1G77850.1	| Symbols: ARF17 | auxin response factor 17 | chr1:29272405-29275193 FORWARD LENGTH=585	5e-75
scaffold01820_10822_10920	mir160	Psat2g034920.1	AT1G77850.1	| Symbols: ARF17 | auxin response factor 17 | chr1:29272405-29275193 FORWARD LENGTH=585	5e-84
scaffold01820_10822_10920	mir160	Psat4g150840.1	No hits found
scaffold02004_25850_26091	mir159	Psat3g025280.1	No hits found
scaffold02004_25850_26091	mir159	Psat5g300240.1	No hits found
scaffold02004_25850_26091	mir159	Psat2g046920.1	No hits found
scaffold02004_25850_26091	mir159	Psat5g300120.1	No hits found
scaffold02004_25850_26091	mir159	Psat1g200600.1	No hits found
scaffold02004_25850_26091	mir159	Psat5g232040.1	No hits found
scaffold02004_25850_26091	mir159	Psat5g208640.1	AT2G32460.1	| Symbols: MYB101, ATMYB101, ATM1 | myb domain protein 101 | chr2:13782419-13784363 REVERSE LENGTH=490	1e-56
scaffold02004_25850_26091	mir159	Psat2g127640.1	AT3G29750.1	| Symbols: | Eukaryotic aspartyl protease family protein | chr3:11579125-11580600 REVERSE LENGTH=421	1e-08
scaffold02004_25850_26091	mir159	Psat3g197960.1	No hits found
scaffold02004_25850_26091	mir159	Psat0s1551g0120.1	AT5G14180.1	| Symbols: MPL1 | Myzus persicae-induced lipase 1 | chr5:4571442-4574413 REVERSE LENGTH=418	3e-28
scaffold02004_25850_26091	mir159	Psat4g060720.1	No hits found
scaffold02004_25850_26091	mir159	Psat4g226000.1	AT3G60460.1	| Symbols: DUO1 | myb-like HTH transcriptional regulator family protein | chr3:22342429-22343491 REVERSE LENGTH=297	2e-78
scaffold02004_25850_26091	mir159	Psat5g225360.3	AT5G06100.1	| Symbols: MYB33, ATMYB33 | myb domain protein 33 | chr5:1838555-1839997 FORWARD LENGTH=451	2e-93
scaffold02004_25850_26091	mir159	Psat5g225360.1	AT3G11440.1	| Symbols: ATMYB65, MYB65 | myb domain protein 65 | chr3:3603056-3604929 FORWARD LENGTH=553	3e-101
scaffold02004_25850_26091	mir159	Psat5g225360.2	AT3G11440.1	| Symbols: ATMYB65, MYB65 | myb domain protein 65 | chr3:3603056-3604929 FORWARD LENGTH=553	3e-101
scaffold02004_25850_26091	mir159	Psat5g079920.1	No hits found
scaffold02004_25850_26091	mir159	Psat1g012480.1	AT1G67020.1	| Symbols: | unknown protein; FUNCTIONS IN: molecular_function unknown; INVOLVED IN: biological_process unknown;LOCATED IN: cellular_component unknown; EXPRESSED IN: leaf;Has 72 Blast hits to 72 proteins in 9 species: Archae -0; Bacteria - 0; Metazoa - 0; Fungi - 0; Plants - 72; Viruses- 0; Other Eukaryotes - 0 (source: NCBI BLink). | chr1:25011008-25012987 REVERSE LENGTH=659	6e-06
scaffold02004_25850_26091	mir159	Psat4g090320.1	No hits found
scaffold02004_25850_26091	mir159	Psat6g164680.3	AT1G02850.2	| Symbols: BGLU11 | beta glucosidase 11 | chr1:630569-633085 FORWARD LENGTH=497	2e-173
scaffold02004_25850_26091	mir159	Psat6g164680.2	AT1G02850.2	| Symbols: BGLU11 | beta glucosidase 11 | chr1:630569-633085 FORWARD LENGTH=497	1e-174
scaffold02004_25850_26091	mir159	Psat6g164680.1	AT1G02850.2	| Symbols: BGLU11 | beta glucosidase 11 | chr1:630569-633085 FORWARD LENGTH=497	0
scaffold02004_25850_26091	mir159	Psat2g011840.1	No hits found
scaffold02004_25850_26091	mir159	Psat2g011880.1	No hits found
scaffold02004_25850_26091	mir159	Psat5g117920.1	AT3G29750.1	| Symbols: | Eukaryotic aspartyl protease family protein | chr3:11579125-11580600 REVERSE LENGTH=421	3e-10
scaffold02004_25850_26091	mir159	Psat6g169480.1	AT1G67020.1	| Symbols: | unknown protein; FUNCTIONS IN: molecular_function unknown; INVOLVED IN: biological_process unknown;LOCATED IN: cellular_component unknown; EXPRESSED IN: leaf;Has 72 Blast hits to 72 proteins in 9 species: Archae -0; Bacteria - 0; Metazoa - 0; Fungi - 0; Plants - 72; Viruses- 0; Other Eukaryotes - 0 (source: NCBI BLink). | chr1:25011008-25012987 REVERSE LENGTH=659	7e-07
scaffold02004_25850_26091	mir159	Psat7g011880.1	AT3G29750.1	| Symbols: | Eukaryotic aspartyl protease family protein | chr3:11579125-11580600 REVERSE LENGTH=421	7e-10
scaffold02004_25850_26091	mir159	Psat1g111280.1	AT3G29750.1	| Symbols: | Eukaryotic aspartyl protease family protein | chr3:11579125-11580600 REVERSE LENGTH=421	4e-09
scaffold02004_25850_26091	mir159	Psat6g181280.1	AT3G29750.1	| Symbols: | Eukaryotic aspartyl protease family protein | chr3:11579125-11580600 REVERSE LENGTH=421	5e-08
scaffold02004_25850_26091	mir159	Psat5g235280.1	AT3G29750.1	| Symbols: | Eukaryotic aspartyl protease family protein | chr3:11579125-11580600 REVERSE LENGTH=421	1e-10
scaffold02004_25850_26091	mir159	Psat5g240600.3	No hits found
scaffold02004_25850_26091	mir159	Psat5g240600.4	No hits found
scaffold02004_25850_26091	mir159	Psat5g211160.1	AT5G06100.1	| Symbols: MYB33, ATMYB33 | myb domain protein 33 | chr5:1838555-1839997 FORWARD LENGTH=451	4e-19
scaffold02004_25850_26091	mir159	Psat5g240600.2	No hits found
scaffold02004_25850_26091	mir159	Psat0s91g0080.1	No hits found
scaffold02004_25850_26091	mir159	Psat5g240600.1	No hits found
scaffold02004_25850_26091	mir159	Psat5g210080.1	AT5G06100.1	| Symbols: MYB33, ATMYB33 | myb domain protein 33 | chr5:1838555-1839997 FORWARD LENGTH=451	2e-65
scaffold02004_25850_26091	mir159	Psat7g134880.1	AT5G15310.2	| Symbols: ATMYB16, ATMIXTA, MYB16 | myb domain protein 16 | chr5:4974894-4976106 FORWARD LENGTH=315	6e-99
scaffold02004_25850_26091	mir159	Psat6g141840.1	AT5G63930.1	| Symbols: | Leucine-rich repeat protein kinase family protein | chr5:25583006-25586392 FORWARD LENGTH=1102	0
scaffold02004_25850_26091	mir159	Psat6g131600.1	No hits found
scaffold02004_25850_26091	mir159	Psat6g131600.2	No hits found
scaffold02004_25850_26091	mir159	Psat5g160320.1	No hits found
scaffold02362_270523_270603		Psat2g039440.1	AT4G14465.1	| Symbols: AHL20 | AT-hook motif nuclear-localized protein 20 | chr4:8320972-8321817 FORWARD LENGTH=281	9e-68
scaffold02479_91953_92061	mir156	Psat2g133080.1	AT1G69170.1	| Symbols: | Squamosa promoter-binding protein-like (SBP domain) transcription factor family protein | chr1:26005626-26007041 FORWARD LENGTH=405	4e-61
scaffold02479_91953_92061	mir156	Psat4g046440.1	AT1G69170.1	| Symbols: | Squamosa promoter-binding protein-like (SBP domain) transcription factor family protein | chr1:26005626-26007041 FORWARD LENGTH=405	4e-48
scaffold02479_91953_92061	mir156	Psat4g046440.2	AT1G69170.1	| Symbols: | Squamosa promoter-binding protein-like (SBP domain) transcription factor family protein | chr1:26005626-26007041 FORWARD LENGTH=405	4e-48
scaffold02479_91953_92061	mir156	Psat5g096720.4	AT5G43270.1	| Symbols: SPL2 | squamosa promoter binding protein-like 2 | chr5:17360527-17362143 REVERSE LENGTH=419	7e-57
scaffold02479_91953_92061	mir156	Psat7g077080.3	AT5G43270.1	| Symbols: SPL2 | squamosa promoter binding protein-like 2 | chr5:17360527-17362143 REVERSE LENGTH=419	7e-54
scaffold02479_91953_92061	mir156	Psat7g077080.2	AT5G43270.1	| Symbols: SPL2 | squamosa promoter binding protein-like 2 | chr5:17360527-17362143 REVERSE LENGTH=419	7e-54
scaffold02479_91953_92061	mir156	Psat7g077080.1	AT5G43270.1	| Symbols: SPL2 | squamosa promoter binding protein-like 2 | chr5:17360527-17362143 REVERSE LENGTH=419	7e-54
scaffold02479_91953_92061	mir156	Psat5g096720.2	AT5G43270.1	| Symbols: SPL2 | squamosa promoter binding protein-like 2 | chr5:17360527-17362143 REVERSE LENGTH=419	3e-59
scaffold02479_91953_92061	mir156	Psat5g096720.1	AT5G43270.1	| Symbols: SPL2 | squamosa promoter binding protein-like 2 | chr5:17360527-17362143 REVERSE LENGTH=419	3e-59
scaffold02479_91953_92061	mir156	Psat5g096720.3	AT5G43270.1	| Symbols: SPL2 | squamosa promoter binding protein-like 2 | chr5:17360527-17362143 REVERSE LENGTH=419	3e-59
scaffold02479_91953_92061	mir156	Psat1g127000.2	AT1G69170.1	| Symbols: | Squamosa promoter-binding protein-like (SBP domain) transcription factor family protein | chr1:26005626-26007041 FORWARD LENGTH=405	9e-48
scaffold02479_91953_92061	mir156	Psat1g127000.1	AT1G69170.1	| Symbols: | Squamosa promoter-binding protein-like (SBP domain) transcription factor family protein | chr1:26005626-26007041 FORWARD LENGTH=405	9e-48
scaffold02479_91953_92061	mir156	Psat5g052160.1	AT5G50570.2	| Symbols: SPL13A, SPL13 | Squamosa promoter-binding protein-like (SBP domain) transcription factor family protein| chr5:20582555-20583791 REVERSE LENGTH=359	1e-67
scaffold02479_91953_92061	mir156	Psat3g069560.1	AT2G42200.1	| Symbols: SPL9, AtSPL9 | squamosa promoter binding protein-like 9 | chr2:17587601-17589451 FORWARD LENGTH=375	5e-65
scaffold02479_91953_92061	mir156	Psat6g101960.1	AT2G42200.1	| Symbols: SPL9, AtSPL9 | squamosa promoter binding protein-like 9 | chr2:17587601-17589451 FORWARD LENGTH=375	2e-54
scaffold02479_91953_92061	mir156	Psat3g157680.1	AT1G27360.4	| Symbols: SPL11 | squamosa promoter-like 11 | chr1:9502139-9503715 FORWARD LENGTH=393	7e-38
scaffold02479_91953_92061	mir156	Psat2g077800.2	No hits found
scaffold02479_91953_92061	mir156	Psat2g077800.3	No hits found
scaffold02479_91953_92061	mir156	Psat2g077800.1	No hits found
scaffold02479_91953_92061	mir156	Psat5g040520.1	AT4G00340.1	| Symbols: RLK4 | receptor-like protein kinase 4 | chr4:148958-151496 FORWARD LENGTH=818	2e-97
scaffold02479_91953_92061	mir156	Psat3g164360.1	AT5G50570.2	| Symbols: SPL13A, SPL13 | Squamosa promoter-binding protein-like (SBP domain) transcription factor family protein| chr5:20582555-20583791 REVERSE LENGTH=359	4e-43
scaffold02479_91953_92061	mir156	Psat3g164360.2	AT5G50570.2	| Symbols: SPL13A, SPL13 | Squamosa promoter-binding protein-like (SBP domain) transcription factor family protein| chr5:20582555-20583791 REVERSE LENGTH=359	4e-43
scaffold02479_91953_92061	mir156	Psat6g022200.1	AT3G07990.1	| Symbols: SCPL27 | serine carboxypeptidase-like 27 | chr3:2552544-2554644 FORWARD LENGTH=459	4e-46
scaffold02479_91953_92061	mir156	Psat5g196400.1	AT5G17230.2	| Symbols: PSY | PHYTOENE SYNTHASE | chr5:5659839-5662087 REVERSE LENGTH=422	0
scaffold02479_91953_92061	mir156	Psat5g196400.2	AT5G17230.2	| Symbols: PSY | PHYTOENE SYNTHASE | chr5:5659839-5662087 REVERSE LENGTH=422	1e-122
scaffold02479_91953_92061	mir156	Psat5g196400.3	AT5G17230.2	| Symbols: PSY | PHYTOENE SYNTHASE | chr5:5659839-5662087 REVERSE LENGTH=422	1e-65
scaffold02479_91953_92061	mir156	Psat6g033960.2	AT5G25610.1	| Symbols: RD22, ATRD22 | BURP domain-containing protein | chr5:8914498-8916684 REVERSE LENGTH=392	1e-109
scaffold02479_91953_92061	mir156	Psat6g033960.1	AT5G25610.1	| Symbols: RD22, ATRD22 | BURP domain-containing protein | chr5:8914498-8916684 REVERSE LENGTH=392	5e-119
scaffold02479_91953_92061	mir156	Psat7g216840.1	AT2G28840.1	| Symbols: XBAT31 | XB3 ortholog 1 in Arabidopsis thaliana | chr2:12378542-12380474 FORWARD LENGTH=456	1e-171
scaffold02479_91953_92061	mir156	Psat3g194440.1	AT3G29290.1	| Symbols: emb2076 | Pentatricopeptide repeat (PPR) superfamily protein | chr3:11238421-11240125 FORWARD LENGTH=540	2e-153
scaffold02479_91953_92061	mir156	Psat4g057000.1	AT1G24450.1	| Symbols: NFD2 | Ribonuclease III family protein | chr1:8664201-8665077 FORWARD LENGTH=191	9e-57
scaffold02479_91953_92061	mir156	Psat3g138600.1	AT2G37660.1	| Symbols: | NAD(P)-binding Rossmann-fold superfamily protein | chr2:15795481-15796977 REVERSE LENGTH=325	5e-160
scaffold02479_91953_92061	mir156	Psat2g015200.1	AT1G50840.1	| Symbols: POLGAMMA2 | polymerase gamma 2 | chr1:18839277-18844313 FORWARD LENGTH=1050	0
scaffold02479_91953_92061	mir156	Psat3g125960.1	AT3G08960.1	| Symbols: | ARM repeat superfamily protein | chr3:2730405-2736762 REVERSE LENGTH=1010	0
scaffold02479_91953_92061	mir156	Psat1g146960.2	AT4G25910.1	| Symbols: NFU3, ATCNFU3 | NFU domain protein 3 | chr4:13164128-13165094 FORWARD LENGTH=236	1e-53
scaffold02479_91953_92061	mir156	Psat1g146960.1	AT4G25910.1	| Symbols: NFU3, ATCNFU3 | NFU domain protein 3 | chr4:13164128-13165094 FORWARD LENGTH=236	9e-93
scaffold02479_91953_92061	mir156	Psat1g132880.1	AT5G12080.3	| Symbols: MSL10, ATMSL10 | mechanosensitive channel of small conductance-like 10 | chr5:3898182-3900923 REVERSE LENGTH=734	0
scaffold02479_91953_92061	mir156	Psat2g171720.1	AT4G37670.2	| Symbols: NAGS2 | N-acetyl-l-glutamate synthase 2 | chr4:17696179-17698836 REVERSE LENGTH=613	0
scaffold03518_91562_91733	mir171_1	Psat3g163480.1	AT4G00150.1	| Symbols: HAM3, ATHAM3, LOM3 | GRAS family transcription factor | chr4:57429-59105 REVERSE LENGTH=558	5e-140
scaffold03518_91562_91733	mir171_1	Psat7g236360.1	AT4G00150.1	| Symbols: HAM3, ATHAM3, LOM3 | GRAS family transcription factor | chr4:57429-59105 REVERSE LENGTH=558	2e-125
scaffold03671_91857_92056	mir167_1	Psat2g059600.1	AT2G38080.1	| Symbols: IRX12, LAC4, ATLMCO4, LMCO4 | Laccase/Diphenol oxidase family protein | chr2:15934540-15937352 FORWARD LENGTH=558	0
scaffold03671_91857_92056	mir167_1	Psat7g112840.1	AT4G04920.2	| Symbols: SFR6 | sensitive to freezing 6 | chr4:2497931-2504996 FORWARD LENGTH=1267	0
scaffold03965_44551_44668	mir164	Psat1g002400.1	AT1G56010.2	| Symbols: NAC1, ANAC022 | NAC domain containing protein 1 | chr1:20946852-20949144 REVERSE LENGTH=324	1e-128
scaffold03965_44551_44668	mir164	Psat4g050600.1	AT5G61430.1	| Symbols: ANAC100, ATNAC5, NAC100 | NAC domain containing protein 100 | chr5:24701328-24702553 REVERSE LENGTH=336	1e-144
scaffold03965_44551_44668	mir164	Psat0s2051g0040.1	AT5G53950.1	| Symbols: CUC2, ANAC098, ATCUC2 | NAC (No Apical Meristem) domain transcriptional regulator superfamily protein| chr5:21901966-21903795 REVERSE LENGTH=375	3e-119
scaffold03965_44551_44668	mir164	Psat0s5198g0040.1	AT5G53950.1	| Symbols: CUC2, ANAC098, ATCUC2 | NAC (No Apical Meristem) domain transcriptional regulator superfamily protein| chr5:21901966-21903795 REVERSE LENGTH=375	3e-82
scaffold03965_44551_44668	mir164	Psat5g193920.1	AT5G61430.1	| Symbols: ANAC100, ATNAC5, NAC100 | NAC domain containing protein 100 | chr5:24701328-24702553 REVERSE LENGTH=336	5e-118
scaffold03965_44551_44668	mir164	Psat4g158840.1	AT4G12740.1	| Symbols: | HhH-GPD base excision DNA repair family protein | chr4:7494578-7497596 REVERSE LENGTH=630	2e-164
scaffold03965_44551_44668	mir164	Psat4g158840.2	AT4G12740.1	| Symbols: | HhH-GPD base excision DNA repair family protein | chr4:7494578-7497596 REVERSE LENGTH=630	6e-148
scaffold03965_44551_44668	mir164	Psat0ss777g0120.1	No hits found
scaffold03965_44551_44668	mir164	Psat7g176440.1	AT3G13530.1	| Symbols: MAPKKK7, MAP3KE1 | mitogen-activated protein kinase kinase kinase 7 | chr3:4411934-4419320 REVERSE LENGTH=1368	0
scaffold03965_44551_44668	mir164	Psat7g111280.1	AT1G61240.4	| Symbols: | Protein of unknown function (DUF707) | chr1:22582537-22585050 FORWARD LENGTH=425	2e-170
scaffold03965_44551_44668	mir164	Psat7g111280.5	AT1G61240.4	| Symbols: | Protein of unknown function (DUF707) | chr1:22582537-22585050 FORWARD LENGTH=425	4e-154
scaffold03965_44551_44668	mir164	Psat7g111280.4	AT1G11170.1	| Symbols: | Protein of unknown function (DUF707) | chr1:3741724-3744459 FORWARD LENGTH=438	1e-151
scaffold03965_44551_44668	mir164	Psat7g111280.3	AT1G11170.1	| Symbols: | Protein of unknown function (DUF707) | chr1:3741724-3744459 FORWARD LENGTH=438	1e-151
scaffold03965_44551_44668	mir164	Psat7g111280.2	AT1G11170.1	| Symbols: | Protein of unknown function (DUF707) | chr1:3741724-3744459 FORWARD LENGTH=438	7e-153
scaffold03965_44551_44668	mir164	Psat2g085400.1	AT4G38050.1	| Symbols: | Xanthine/uracil permease family protein | chr4:17869529-17872461 REVERSE LENGTH=709	2e-12
scaffold04340_50698_50831	mir162_1	Psat3g000680.1	AT1G01040.1	| Symbols: DCL1, CAF, SUS1, SIN1, ASU1, EMB76, EMB60, ATDCL1 | dicer-like 1 | chr1:23519-31079 FORWARD LENGTH=1909	0
scaffold04340_50698_50831	mir162_1	Psat6g204360.3	AT4G14720.1	| Symbols: PPD2, TIFY4B | TIFY domain/Divergent CCT motif family protein | chr4:8432452-8434934 REVERSE LENGTH=315	3e-63
scaffold04340_50698_50831	mir162_1	Psat6g204360.1	AT4G14720.1	| Symbols: PPD2, TIFY4B | TIFY domain/Divergent CCT motif family protein | chr4:8432452-8434934 REVERSE LENGTH=315	3e-70
scaffold04340_50698_50831	mir162_1	Psat3g194800.1	AT4G14000.1	| Symbols: | Putative methyltransferase family protein | chr4:8090851-8092347 FORWARD LENGTH=290	1e-110
scaffold04340_50698_50831	mir162_1	Psat4g064880.1	AT3G48490.1	| Symbols: | unknown protein; Has 16 Blast hits to 16 proteins in 7 species: Archae - 0; Bacteria - 0; Metazoa- 0; Fungi - 1; Plants - 15; Viruses - 0; Other Eukaryotes- 0 (source: NCBI BLink). | chr3:17961338-17961800 FORWARD LENGTH=120	5e-10
scaffold04340_50698_50831	mir162_1	Psat3g000200.1	AT5G49960.1	| Symbols: | unknown protein; CONTAINS InterPro DOMAIN/s: Protein of unknown function DUF1012 (InterPro:IPR010420);BEST Arabidopsis thaliana protein match is: Protein of unknown function (DUF1012) (TAIR:AT5G02940.1); Has 1807 Blast hits to 1807 proteins in 277 species: Archae - 0; Bacteria- 0; Metazoa - 736; Fungi - 347; Plants - 385; Viruses -0; Other Eukaryotes - 339 (source: NCBI BLink). | chr…	0
super-scaffold6646_352010_352166	mir156	Psat2g133080.1	AT1G69170.1	| Symbols: | Squamosa promoter-binding protein-like (SBP domain) transcription factor family protein | chr1:26005626-26007041 FORWARD LENGTH=405	4e-61
super-scaffold6646_352010_352166	mir156	Psat4g046440.1	AT1G69170.1	| Symbols: | Squamosa promoter-binding protein-like (SBP domain) transcription factor family protein | chr1:26005626-26007041 FORWARD LENGTH=405	4e-48
super-scaffold6646_352010_352166	mir156	Psat4g046440.2	AT1G69170.1	| Symbols: | Squamosa promoter-binding protein-like (SBP domain) transcription factor family protein | chr1:26005626-26007041 FORWARD LENGTH=405	4e-48
super-scaffold6646_352010_352166	mir156	Psat5g096720.4	AT5G43270.1	| Symbols: SPL2 | squamosa promoter binding protein-like 2 | chr5:17360527-17362143 REVERSE LENGTH=419	7e-57
super-scaffold6646_352010_352166	mir156	Psat7g077080.3	AT5G43270.1	| Symbols: SPL2 | squamosa promoter binding protein-like 2 | chr5:17360527-17362143 REVERSE LENGTH=419	7e-54
super-scaffold6646_352010_352166	mir156	Psat7g077080.2	AT5G43270.1	| Symbols: SPL2 | squamosa promoter binding protein-like 2 | chr5:17360527-17362143 REVERSE LENGTH=419	7e-54
super-scaffold6646_352010_352166	mir156	Psat7g077080.1	AT5G43270.1	| Symbols: SPL2 | squamosa promoter binding protein-like 2 | chr5:17360527-17362143 REVERSE LENGTH=419	7e-54
super-scaffold6646_352010_352166	mir156	Psat5g096720.2	AT5G43270.1	| Symbols: SPL2 | squamosa promoter binding protein-like 2 | chr5:17360527-17362143 REVERSE LENGTH=419	3e-59
super-scaffold6646_352010_352166	mir156	Psat5g096720.1	AT5G43270.1	| Symbols: SPL2 | squamosa promoter binding protein-like 2 | chr5:17360527-17362143 REVERSE LENGTH=419	3e-59
super-scaffold6646_352010_352166	mir156	Psat5g096720.3	AT5G43270.1	| Symbols: SPL2 | squamosa promoter binding protein-like 2 | chr5:17360527-17362143 REVERSE LENGTH=419	3e-59
super-scaffold6646_352010_352166	mir156	Psat1g127000.2	AT1G69170.1	| Symbols: | Squamosa promoter-binding protein-like (SBP domain) transcription factor family protein | chr1:26005626-26007041 FORWARD LENGTH=405	9e-48
super-scaffold6646_352010_352166	mir156	Psat1g127000.1	AT1G69170.1	| Symbols: | Squamosa promoter-binding protein-like (SBP domain) transcription factor family protein | chr1:26005626-26007041 FORWARD LENGTH=405	9e-48
super-scaffold6646_352010_352166	mir156	Psat5g052160.1	AT5G50570.2	| Symbols: SPL13A, SPL13 | Squamosa promoter-binding protein-like (SBP domain) transcription factor family protein| chr5:20582555-20583791 REVERSE LENGTH=359	1e-67
super-scaffold6646_352010_352166	mir156	Psat3g069560.1	AT2G42200.1	| Symbols: SPL9, AtSPL9 | squamosa promoter binding protein-like 9 | chr2:17587601-17589451 FORWARD LENGTH=375	5e-65
super-scaffold6646_352010_352166	mir156	Psat6g101960.1	AT2G42200.1	| Symbols: SPL9, AtSPL9 | squamosa promoter binding protein-like 9 | chr2:17587601-17589451 FORWARD LENGTH=375	2e-54
super-scaffold6646_352010_352166	mir156	Psat3g157680.1	AT1G27360.4	| Symbols: SPL11 | squamosa promoter-like 11 | chr1:9502139-9503715 FORWARD LENGTH=393	7e-38
super-scaffold6646_352010_352166	mir156	Psat2g077800.2	No hits found
super-scaffold6646_352010_352166	mir156	Psat2g077800.3	No hits found
super-scaffold6646_352010_352166	mir156	Psat2g077800.1	No hits found
super-scaffold6646_352010_352166	mir156	Psat5g040520.1	AT4G00340.1	| Symbols: RLK4 | receptor-like protein kinase 4 | chr4:148958-151496 FORWARD LENGTH=818	2e-97
super-scaffold6646_352010_352166	mir156	Psat3g164360.1	AT5G50570.2	| Symbols: SPL13A, SPL13 | Squamosa promoter-binding protein-like (SBP domain) transcription factor family protein| chr5:20582555-20583791 REVERSE LENGTH=359	4e-43
super-scaffold6646_352010_352166	mir156	Psat3g164360.2	AT5G50570.2	| Symbols: SPL13A, SPL13 | Squamosa promoter-binding protein-like (SBP domain) transcription factor family protein| chr5:20582555-20583791 REVERSE LENGTH=359	4e-43
super-scaffold6646_352010_352166	mir156	Psat6g022200.1	AT3G07990.1	| Symbols: SCPL27 | serine carboxypeptidase-like 27 | chr3:2552544-2554644 FORWARD LENGTH=459	4e-46
super-scaffold6646_352010_352166	mir156	Psat5g196400.1	AT5G17230.2	| Symbols: PSY | PHYTOENE SYNTHASE | chr5:5659839-5662087 REVERSE LENGTH=422	0
super-scaffold6646_352010_352166	mir156	Psat5g196400.2	AT5G17230.2	| Symbols: PSY | PHYTOENE SYNTHASE | chr5:5659839-5662087 REVERSE LENGTH=422	1e-122
super-scaffold6646_352010_352166	mir156	Psat5g196400.3	AT5G17230.2	| Symbols: PSY | PHYTOENE SYNTHASE | chr5:5659839-5662087 REVERSE LENGTH=422	1e-65
super-scaffold6646_352010_352166	mir156	Psat6g033960.2	AT5G25610.1	| Symbols: RD22, ATRD22 | BURP domain-containing protein | chr5:8914498-8916684 REVERSE LENGTH=392	1e-109
super-scaffold6646_352010_352166	mir156	Psat6g033960.1	AT5G25610.1	| Symbols: RD22, ATRD22 | BURP domain-containing protein | chr5:8914498-8916684 REVERSE LENGTH=392	5e-119
super-scaffold6646_352010_352166	mir156	Psat7g216840.1	AT2G28840.1	| Symbols: XBAT31 | XB3 ortholog 1 in Arabidopsis thaliana | chr2:12378542-12380474 FORWARD LENGTH=456	1e-171
super-scaffold6646_352010_352166	mir156	Psat3g194440.1	AT3G29290.1	| Symbols: emb2076 | Pentatricopeptide repeat (PPR) superfamily protein | chr3:11238421-11240125 FORWARD LENGTH=540	2e-153
super-scaffold6646_352010_352166	mir156	Psat4g057000.1	AT1G24450.1	| Symbols: NFD2 | Ribonuclease III family protein | chr1:8664201-8665077 FORWARD LENGTH=191	9e-57
super-scaffold6646_352010_352166	mir156	Psat3g138600.1	AT2G37660.1	| Symbols: | NAD(P)-binding Rossmann-fold superfamily protein | chr2:15795481-15796977 REVERSE LENGTH=325	5e-160
super-scaffold6646_352010_352166	mir156	Psat2g015200.1	AT1G50840.1	| Symbols: POLGAMMA2 | polymerase gamma 2 | chr1:18839277-18844313 FORWARD LENGTH=1050	0
super-scaffold6646_352010_352166	mir156	Psat3g125960.1	AT3G08960.1	| Symbols: | ARM repeat superfamily protein | chr3:2730405-2736762 REVERSE LENGTH=1010	0
super-scaffold6646_352010_352166	mir156	Psat1g146960.2	AT4G25910.1	| Symbols: NFU3, ATCNFU3 | NFU domain protein 3 | chr4:13164128-13165094 FORWARD LENGTH=236	1e-53
super-scaffold6646_352010_352166	mir156	Psat1g146960.1	AT4G25910.1	| Symbols: NFU3, ATCNFU3 | NFU domain protein 3 | chr4:13164128-13165094 FORWARD LENGTH=236	9e-93
super-scaffold6646_352010_352166	mir156	Psat1g132880.1	AT5G12080.3	| Symbols: MSL10, ATMSL10 | mechanosensitive channel of small conductance-like 10 | chr5:3898182-3900923 REVERSE LENGTH=734	0
super-scaffold6646_352010_352166	mir156	Psat2g171720.1	AT4G37670.2	| Symbols: NAGS2 | N-acetyl-l-glutamate synthase 2 | chr4:17696179-17698836 REVERSE LENGTH=613	0
super-scaffold9438_161134_161280		Psat7g071840.1	AT5G19820.1	| Symbols: emb2734 | ARM repeat superfamily protein | chr5:6695731-6701247 REVERSE LENGTH=1116	0
super-scaffold9438_161134_161280		Psat7g119400.1	AT3G59770.1	| Symbols: SAC9 | sacI homology domain-containing protein / WW domain-containing protein | chr3:22079281-22085674 REVERSE LENGTH=1630	0
super-scaffold9438_161134_161280		Psat5g118160.1	AT2G31880.1	| Symbols: SOBIR1, EVR | Leucine-rich repeat protein kinase family protein | chr2:13554920-13556845 FORWARD LENGTH=641	0
super-scaffold9438_161134_161280		Psat3g125520.1	AT4G33070.1	| Symbols: | Thiamine pyrophosphate dependent pyruvate decarboxylase family protein | chr4:15952519-15954676 REVERSE LENGTH=607	0
super-scaffold9438_161134_161280		Psat2g152840.1	AT3G51320.1	| Symbols: | Pentatricopeptide repeat (PPR) superfamily protein | chr3:19049853-19051445 REVERSE LENGTH=530	1e-168
super-scaffold9438_161134_161280		Psat6g206640.1	No hits found
super-scaffold9438_161134_161280		Psat3g086040.1	No hits found
super-scaffold9438_161134_161280		Psat6g155960.1	AT3G05900.1	| Symbols: | neurofilament protein-related | chr3:1761408-1763854 REVERSE LENGTH=673	2e-08
super-scaffold9438_161134_161280		Psat6g155960.3	AT3G05900.1	| Symbols: | neurofilament protein-related | chr3:1761408-1763854 REVERSE LENGTH=673	2e-08
super-scaffold9438_161134_161280		Psat6g155960.2	AT3G05900.1	| Symbols: | neurofilament protein-related | chr3:1761408-1763854 REVERSE LENGTH=673	2e-08
super-scaffold9438_161134_161280		Psat6g155960.4	AT3G05900.1	| Symbols: | neurofilament protein-related | chr3:1761408-1763854 REVERSE LENGTH=673	2e-08

## Sheet: Table S9
Table S9: Champagne specific differentially expressed genes at T1
For each stranded genes, log2 Fold Change are specified for significant contrasts. Gene annotation is indicated when identified.
Genes	log2 Fold Change				Annotation
	Ch_LT_T1 vs Ch_N_T1	Ch_LT_T1 vs Te_LT_T1	Ch_N_T1 vs Te_N_T1	Te_LT_T1 vs Te_N_T1
-:Psat0s1142g0040	-0.59509	-1.14023	-0.87621		Unknown gene
-:Psat0s1587g0080	-0.81348	1.58605	1.52165		Fasciclin domain
-:Psat0s1894g0120	0.647445	2.49026	2.19179		Acyltransferase C-terminus
-:Psat0s3119g0400	-1.40659	-1.53414			Auxin responsive SAUR protein
-:Psat0s3278g0200	0.760191	2.33245	1.60463		Intracellular membrane-bounded organelle
-:Psat0s3964g0080	0.413204	0.976142	0.63035		Prp19/Pso4-like
-:Psat0s4097g0040	-0.620036				Prolyl oligopeptidase family
-:Psat0s4221g0160	-1.23178				Substrate-specific transmembrane transporter activity
-:Psat0s4468g0080	-1.26851	8.81674	6.00499		Auxin responsive protein
-:Psat0s489g0080	-1.04295				Alpha-N-acetylglucosaminidase (NAGLU) tim-barrel domain
-:Psat0s5229g0080	0.806244		-0.660644		DEAD/DEAH box helicase
-:Psat1g051840	0.908957				Squalene-hopene cyclase C-terminal domain				.
-:Psat1g089880	-1.6593				Amino acid permease
-:Psat1g143880	-1.03306				Unknown gene
-:Psat1g149240	-1.21972	7.84482	9.06455		Tub family
-:Psat1g159960	0.779655	1.02971			Glycosyl hydrolase family 3 C-terminal domain
-:Psat1g177840	-0.827781		1.0091		Unknown gene
-:Psat1g181680	-0.949517				RNA recognition motif. (a.k.a. RRM + RBD + or RNP domain)
-:Psat2g007840	-0.816846		0.916716		Cell part
-:Psat2g018960	-0.771469	5.36935	5.53891		UDP-glucoronosyl and UDP-glucosyl transferase
-:Psat2g022920	-1.22761	-1.72165			Aromatic-ring hydroxylase (flavoprotein monooxygenase) signature
-:Psat2g022960	-0.645294	-1.51121			GDSL-like Lipase/Acylhydrolase
-:Psat2g031760	-1.04612				Ankyrin repeats (3 copies)
-:Psat2g078720	-0.573979				Protein kinase domain
-:Psat2g082800	-1.16836		1.0572		Unknown gene
-:Psat2g085640	-1.36292	-3.97572	-2.52091		Unknown gene
-:Psat2g101960	-1.23545				Chromo (CHRromatin Organisation MOdifier) domain
-:Psat2g103920	-0.526825		0.422249		GDSL/SGNH-like Acyl-Esterase family found in Pmr5 and Cas1p
-:Psat2g148640	0.977607	8.50694	7.52934		Unknown gene
-:Psat2g178960	-0.682391				Endonuclease activity + active with either ribo- or deoxyribonucleic acids and producing 5'-phosphomonoesters
-:Psat2g187480	0.888847		-0.71439		Unknown gene
-:Psat3g035640	-0.802083				Unknown gene
-:Psat3g115120	-1.03852	-1.61255			Fasciclin domain
-:Psat3g144720	-1.12637	8.60974	9.73612		Calcium-dependent cysteine-type endopeptidase activity
-:Psat3g188840	3.27761	-3.22041	-5.16031		Unknown gene
-:Psat4g001480	-0.879533	4.5544	3.58665		Amidase
-:Psat4g014640	1.24202	1.91531			Endonuclease I
-:Psat4g033960	0.546048				Sugar (and other) transporter
-:Psat4g034520	1.27126				Intracellular non-membrane-bounded organelle
-:Psat4g045760	-0.610882	-0.485135			Protein of unknown function DUF292 + eukaryotic
-:Psat4g049080	-0.748751		0.867619		Formin Homology 2 Domain
-:Psat4g088240	-1.08533				Unknown gene
-:Psat4g136080	-1.41657		0.906715		Protein kinase domain
-:Psat4g140200	-1.12877	-2.332	-0.946679		SecY translocase
-:Psat4g144760	-1.14321				MULE transposase domain
-:Psat4g166800	-1.15867				Spt20 family
-:Psat4g203160	-1.69478	6.98902	8.6838		MutS domain V
-:Psat4g204040	0.605997				Cytochrome P450
-:Psat4g207680	-0.767535	9.2216	9.98913		Unknown gene
-:Psat5g016160	1.12877				Inositol-pentakisphosphate 2-kinase
-:Psat5g028320	-0.577395	-0.603486			Cell part
-:Psat5g030120	1.34516				Myosin head (motor domain)
-:Psat5g033880	-1.16792		1.6882		Protein tyrosine kinase
-:Psat5g054560	1.36744		-1.14314		AAA domain (Cdc48 subfamily)
-:Psat5g089440	1.54633	1.10587			PLAT/LH2 domain
-:Psat5g091840	0.910177	1.13908			Coilin N-terminus
-:Psat5g098560	-0.652245	-0.474035			Transmembrane amino acid transporter protein
-:Psat5g099320	-2.00246				UDP-glucoronosyl and UDP-glucosyl transferase
-:Psat5g112280	-1.26704				Aspartyl protease
-:Psat5g114240	-2.3171	-1.67946			Protein tyrosine kinase
-:Psat5g126680	-1.08984	-0.67732			Hs1pro-1 protein C-terminus
-:Psat5g133800	-1.92735				Transition metal ion binding
-:Psat5g143080	-0.538749				Protein kinase domain
-:Psat5g263200	-1.884	-4.26383	-2.4961		Substrate-specific transmembrane transporter activity
-:Psat6g008960	0.714098	5.49751	5.05951		5' nucleotidase family
-:Psat6g022400	-1.06198	0.787443	1.50808		Spermine/spermidine synthase
-:Psat6g045720	1.21191		-1.48278		Winged helix-turn-helix transcription repressor DNA-binding
-:Psat6g115600	-0.631798	7.7727	7.85722		Virilizer + N-terminal
-:Psat6g155640	1.48887				Aminotransferase class-V
-:Psat6g159120	0.525052	2.2596	2.04179		HTH transcriptional regulator + Myb-type + DNA-binding
-:Psat6g190920	-0.473503				Protein kinase domain
-:Psat7g049120	-0.986065	5.60028	6.04282		Ribonucleotide reductase + barrel domain
-:Psat7g052840	1.31092	1.55034			Myo-inositol-1-phosphate synthase
-:Psat7g075600	-0.619951				UDP-glucoronosyl and UDP-glucosyl transferase
-:Psat7g080400	-1.69198				DEAD/DEAH box helicase
-:Psat7g106000	-1.19921	7.27891	8.47811		Calcium-dependent cysteine-type endopeptidase activity
-:Psat7g106040	-0.831093	7.86477	8.69587		Cellular nucleobase + nucleoside + nucleotide and nucleic acid metabolic process
-:Psat7g172920	-1.08215		1.45993		Nodulin-like
-:Psat7g174960	-0.92028				NB-ARC domain
-:Psat7g192400	-1.98771	7.21031	6.53092		Protein tyrosine kinase
-:Psat7g201920	-0.739153				Elongation factor Tu GTP binding domain
+:Psat0s1021g0040	0.40289				Synaptobrevin
+:Psat0s1031g0080	-0.938142				Unknown gene
+:Psat0s1048g0120	-0.87364	0.59303	1.11213		UDP-glucoronosyl and UDP-glucosyl transferase
+:Psat0s1110g0120	0.861988		-0.871109		Transferase family
+:Psat0s1118g0080	0.580536				3'-5' exonuclease
+:Psat0s1144g0080	0.797564				Ankyrin repeats (many copies)
+:Psat0s1163g0240	-0.412481				Cytochrome oxidase c subunit VIb
+:Psat0s1163g0480	1.81286				Prokaryotic membrane lipoprotein lipid attachment site profile.
+:Psat0s1168g0040	-0.520919				Unknown gene
+:Psat0s116g0200	0.742015				Pollen allergen
+:Psat0s12239g0040	0.679587	0.980075			Unknown gene
+:Psat0s1248g0040	-0.496605				Zinc finger of C3HC4-type + RING
+:Psat0s1268g0360	-0.41493	-0.598612			Subtilase family
+:Psat0s126g0080	-0.929557	10.2006	10.5842		Hydrolase activity + acting on acid anhydrides + in phosphorus-containing anhydrides
+:Psat0s1315g0080	-0.54996				Photosystem I psaG / psaK
+:Psat0s1377g0200	0.609311	0.46014			Histone-like transcription factor (CBF/NF-Y) and archaeal histone
+:Psat0s1389g0240	0.400713	0.351738			Strictosidine synthase
+:Psat0s1389g0280	0.571402	0.450332			Strictosidine synthase + conserved region
+:Psat0s1394g0040	-0.91458	0.882712	1.69172		Haloacid dehalogenase-like hydrolase
+:Psat0s1402g0040	0.495831				PRA1 family protein
+:Psat0s1431g0080	0.371991				Disordered region downstream of MFMR
+:Psat0s1448g0040	0.332049				RNA recognition motif. (a.k.a. RRM + RBD + or RNP domain)
+:Psat0s1460g0040	-1.28375				Unknown gene
+:Psat0s1479g0120	-0.534069				Intracellular membrane-bounded organelle
+:Psat0s1510g0040	-0.474521	1.36173	1.3701		Protein of unknown function + DUF538
+:Psat0s1511g0040	0.659313	0.395038			Nop53 (60S ribosomal biogenesis)
+:Psat0s1521g0080	-0.809127	-1.62782	-0.595523		Alpha/beta hydrolase family
+:Psat0s1531g0040	-0.626108				Hydrolase activity + acting on acid anhydrides + in phosphorus-containing anhydrides
+:Psat0s1548g0040	0.983773				TCP-1/cpn60 chaperonin family
+:Psat0s1567g0160	0.381005				Sucrase/ferredoxin-like
+:Psat0s1681g0120	-0.780868				Heavy-metal-associated domain
+:Psat0s1719g0080	0.500755				Flavin containing amine oxidoreductase
+:Psat0s1726g0040	0.704199	0.802133			Transferase activity + transferring phosphorus-containing groups
+:Psat0s1728g0080	-0.436379		0.413385		Di-glucose binding within endoplasmic reticulum
+:Psat0s1747g0080	-0.66644	4.88372	6.11146		Lipoxygenase
+:Psat0s1748g0080	-0.421938				FAR1 DNA-binding domain
+:Psat0s1781g0240	1.24341		-0.952748		Pectinesterase
+:Psat0s1815g0040	-0.444219				Thioredoxin
+:Psat0s1830g0040	-0.491093	-0.451964			KH domain
+:Psat0s1830g0160	0.759101				GPI-Mannosyltransferase II co-activator
+:Psat0s1849g0080	0.564285				CCT motif
+:Psat0s1875g0160	-0.426687				Helix-loop-helix DNA-binding domain
+:Psat0s1894g0080	-0.746036				Unknown gene
+:Psat0s1930g0040	0.43038				Unknown gene
+:Psat0s1933g0120	1.11477	1.83307			ABC transporter
+:Psat0s1938g0040	-1.01602	-0.989013			Methyladenine glycosylase
+:Psat0s1940g0160	-0.57472				PsbP
+:Psat0s1945g0080	0.542524				Prephenate dehydratase
+:Psat0s194g0080	0.478024				Cyclophilin type peptidyl-prolyl cis-trans isomerase/CLD
+:Psat0s1952g0120	-0.395493	-0.528078			Uncharacterised protein family (UPF0014)
+:Psat0s1953g0400	-0.606182	0.973277	0.90467		Serine carboxypeptidase
+:Psat0s1971g0280	0.480184	0.431157			Gar1/Naf1 RNA binding region
+:Psat0s1978g0160	0.478709				3-oxo-5-alpha-steroid 4-dehydrogenase
+:Psat0s2005g0040	0.345098				Mevalonate kinase family signature
+:Psat0s2005g0080	0.462944		-0.523138		Galactokinase galactose-binding signature
+:Psat0s2027g0080	0.989795	0.599753			Thymidine kinase
+:Psat0s2121g0040	-0.53323	1.69612	2.50615		Unknown gene
+:Psat0s212g0080	0.408587				Protein kinase domain
+:Psat0s215g0200	-0.571844				Unknown gene
+:Psat0s215g0280	0.609715				FBD
+:Psat0s2168g0040	0.449278				NifU-like N terminal domain
+:Psat0s2176g0120	-0.589069		0.631031		Unknown gene
+:Psat0s2200g0080	-1.08146				Protein tyrosine kinase
+:Psat0s2211g0040	-0.530546				Unknown gene
+:Psat0s2295g0240	0.562468				Unknown gene
+:Psat0s22g0040	-0.479862	-0.496303			GH3 auxin-responsive promoter
+:Psat0s2363g0200	-0.47982				Photosystem II reaction centre X protein (PsbX)
+:Psat0s2365g0040	0.434566				Unknown gene
+:Psat0s2365g0080	-0.645201		0.703048		Pentatricopeptide repeat
+:Psat0s2366g0080	-0.323404				Pyridine nucleotide-disulphide oxidoreductase
+:Psat0s2372g0160	-0.894589		0.81965		Ankyrin repeats (3 copies)
+:Psat0s2372g0280	-0.697451				Ankyrin repeats (3 copies)
+:Psat0s2373g0160	0.640453				Unknown gene
+:Psat0s2390g0040	0.605103				Intracellular membrane-bounded organelle
+:Psat0s2399g0040	-0.466732				Protein binding
+:Psat0s2406g0160	-0.319259				Glycogen recognition site of AMP-activated protein kinase
+:Psat0s2495g0040	-0.634981	1.05608	1.20137		Unknown gene
+:Psat0s2508g0080	-0.77811	-1.14299			Unknown gene
+:Psat0s2550g0120	-0.299654				Glycosyl transferase family 8
+:Psat0s2555g0200	-0.477851				2-C-methyl-D-erythritol 4-phosphate cytidylyltransferase
+:Psat0s2564g0080	-0.970728	-1.06782			Terpene synthase family + metal binding domain
+:Psat0s2583g0040	1.1339	0.749734			PRMT5 arginine-N-methyltransferase
+:Psat0s2597g0160	1.21726		-0.856721		Raffinose synthase or seed imbibition protein Sip1
+:Psat0s2604g0080	0.843567	0.494185			MTERF
+:Psat0s2604g0120	0.430219				MTERF
+:Psat0s2626g0040	-1.03334				Enoyl-(Acyl carrier protein) reductase
+:Psat0s2691g0120	0.769181	0.508789			Microtubule-associated protein CRIPT
+:Psat0s2694g0160	-1.17559				Molybdate transporter of MFS superfamily
+:Psat0s2703g0240	-0.45529				Tryptophan/tyrosine permease family
+:Psat0s2724g0120	0.658306				Unknown gene
+:Psat0s2724g0200	-0.523604				Protein kinase domain
+:Psat0s2739g0120	-0.379749				Uncharacterized protein family (UPF0051)
+:Psat0s2745g0040	0.606374				DIRP
+:Psat0s2745g0160	0.653894				Transcription regulator cyclin
+:Psat0s2745g0240	0.795953				Cyclin C-terminal domain
+:Psat0s2745g0280	-0.501578		0.490195		Unknown gene
+:Psat0s2786g0040	0.329015				Protein of unknown function (DUF620)
+:Psat0s2790g0200	-0.469031				Domain of unknown function (DUF3411)
+:Psat0s2814g0040	0.687586	0.88145			Mitochondrial carrier protein signature
+:Psat0s2837g0080	1.10747	1.36347			Transferase family
+:Psat0s2843g0040	0.441487				DEAD/DEAH box helicase
+:Psat0s2845g0080	1.89792	1.93026			UDP-glucoronosyl and UDP-glucosyl transferase
+:Psat0s2845g0240	-0.361568				Sel1-like
+:Psat0s2870g0040	-0.3154	-0.798668	-0.357264		K+ potassium transporter
+:Psat0s2922g0080	0.573443	0.547955			Pyridoxal phosphate-dependent transferase + major region + subdomain 1
+:Psat0s2968g0080	0.491883	0.827842			Enoyl-(Acyl carrier protein) reductase
+:Psat0s2970g0120	0.498884	0.502112			MTERF
+:Psat0s2980g0200	-0.54643				Protein tyrosine kinase
+:Psat0s2997g0040	2.84288	-7.27823	-9.8706		Pectinesterase
+:Psat0s2998g0040	-0.572489	3.04678	3.85988		Mitochondrial carrier protein
+:Psat0s3015g0040	0.825662	-0.792631	-1.0542		NB-ARC domain
+:Psat0s3022g0080	0.500328	0.491227			MTERF
+:Psat0s302g0200	-0.964478				Myb-like DNA-binding domain
+:Psat0s3053g0120	-1.0109				Uracil phosphoribosyltransferase
+:Psat0s3063g0120	-0.942652		0.990658		Unknown gene
+:Psat0s3071g0160	0.788207				Unknown gene
+:Psat0s3082g0080	-0.51628				GDP-fucose protein O-fucosyltransferase
+:Psat0s3104g0160	-0.393674				Unknown gene
+:Psat0s3111g0160	-0.401892	-0.934759	-0.733062		EF-hand domain pair
+:Psat0s3135g0040	0.660286	0.516478			Zinc knuckle
+:Psat0s3169g0040	0.549528				RecQ-mediated genome instability protein 2
+:Psat0s3170g0160	0.618908				Domain of unknown function (DUF4782)
+:Psat0s3175g0040	-0.357965				NAD(P)H-binding
+:Psat0s3193g0120	-0.337054				Regulation of cellular nucleobase + nucleoside + nucleotide and nucleic acid metabolic process
+:Psat0s3208g0040	-0.51671				NB-ARC domain
+:Psat0s3238g0040	-0.562102	-0.54228			Zinc-finger of the FCS-type + C2-C2
+:Psat0s3258g0040	0.540287				NAD dependent epimerase/dehydratase family
+:Psat0s3273g0040	-0.670455				NLI interacting factor-like phosphatase
+:Psat0s3278g0080	0.38364				Unknown gene
+:Psat0s3302g0040	-0.474211	-0.397142			WAX2 C-terminal domain
+:Psat0s3317g0040	-0.306041				Unknown gene
+:Psat0s3339g0040	-0.857639	0.840367	1.27909		Peptidase activity + acting on L-amino acid peptides
+:Psat0s3383g0080	1.23034				Histone-like transcription factor (CBF/NF-Y) and archaeal histone
+:Psat0s3384g0080	-0.578197				Unknown gene
+:Psat0s3397g0040	-0.766436	-0.878472			Unknown gene
+:Psat0s3398g0280	0.554715	0.518748			Aminotransferase class I and II
+:Psat0s3400g0080	0.93744	0.535659			Lon protease (S16) C-terminal proteolytic domain
+:Psat0s3407g0040	0.420048				TCP-1/cpn60 chaperonin family
+:Psat0s3458g0040	0.568849	0.774743			Elongation factor Tu GTP binding domain
+:Psat0s3462g0080	0.75499	1.20537	1.10511		Ion transport protein
+:Psat0s3467g0080	0.478045				Non-haem dioxygenase in morphine synthesis N-terminal
+:Psat0s3476g0080	-0.463922				Dof domain + zinc finger
+:Psat0s3481g0040	1.378	1.09319			PPR repeat family
+:Psat0s3481g0080	0.441256				Protein kinase domain
+:Psat0s350g0080	0.723876				Substrate-specific transmembrane transporter activity
+:Psat0s3511g0080	-1.16725	-2.89781	-1.48323		FAD binding domain
+:Psat0s3526g0080	-0.509578	0.706699	1.05247		Protein phosphatase 2C
+:Psat0s3575g0040	-0.395036	3.72792	3.47533		Regulation of generation of precursor metabolites and energy
+:Psat0s3594g0040	0.376528				Auxin response factor
+:Psat0s3602g0040	0.421327	0.549853			Chaperonin 10 Kd subunit
+:Psat0s3618g0080	0.591922				DnaJ domain
+:Psat0s3618g0120	-0.61372				Unknown gene
+:Psat0s3633g0080	0.969557				Pectinesterase
+:Psat0s3656g0080	0.795196	0.825331			Fibrillarin
+:Psat0s368g0120	-0.53894				Myosin head (motor domain)
+:Psat0s3702g0040	-0.519854				Glycosyl transferase family 8
+:Psat0s3709g0040	-0.648864				XS domain
+:Psat0s3806g0040	0.694697	0.502991			Unknown gene
+:Psat0s3817g0040	-0.428604	8.94415	8.82691		Unknown gene
+:Psat0s3817g0160	0.880244				PPR repeat family
+:Psat0s3819g0040	-0.670024	-0.696984			Probable lipid transfer
+:Psat0s3850g0080	-0.938907	-0.809963			D-arabinono-1 +4-lactone oxidase
+:Psat0s3887g0080	0.466147				BRCA1-associated protein 2
+:Psat0s3917g0040	-0.542705				Lipase (class 3)
+:Psat0s3925g0040	-1.13833				POT family
+:Psat0s3930g0080	0.362711				MIF4G domain
+:Psat0s3943g0040	0.33343				CUE domain
+:Psat0s3964g0040	0.488607	0.546968			Unknown gene
+:Psat0s4007g0120	-1.02939		1.31343		Amidohydrolase family
+:Psat0s4061g0120	-1.15556		1.19094		Alpha/beta hydrolase fold
+:Psat0s4099g0040	-0.970407	-0.678111			Unknown gene
+:Psat0s4126g0040	0.566011				Unknown gene
+:Psat0s4143g0040	1.04587	-1.13311	-2.09919		Transferase family
+:Psat0s4182g0080	1.19753	2.48341	1.57529		Unknown gene
+:Psat0s425g0120	0.62982	0.89662	0.499943		Protein kinase domain
+:Psat0s4267g0040	-0.459361				Peptidase family M50
+:Psat0s4301g0040	-0.461334				Unknown gene
+:Psat0s4319g0040	0.396891				Tim17/Tim22/Tim23/Pmp24 family
+:Psat0s4355g0120	0.692625	4.20796	4.14045		3' exoribonuclease family + domain 1
+:Psat0s443g0080	0.6792				PPR repeat family
+:Psat0s4480g0120	1.36149				Helicase conserved C-terminal domain
+:Psat0s4497g0040	0.389581	0.528322			Fatty acid desaturase
+:Psat0s4546g0040	-0.403261				Uncharacterised ACR + YagE family COG1723
+:Psat0s4560g0040	-0.285445				X-domain of DnaJ-containing
+:Psat0s4582g0040	0.481078				Ribosomal protein S19
+:Psat0s4589g0040	0.541787	-0.852528	-0.901233		NB-ARC domain
+:Psat0s4627g0080	0.391911				Tetratricopeptide repeat
+:Psat0s4627g0120	0.331735				TPR repeat profile.
+:Psat0s4627g0160	-0.650743				Intracellular membrane-bounded organelle
+:Psat0s4662g0040	0.409625	0.864469	0.692682		Metalloenzyme superfamily
+:Psat0s471g0160	0.411233				Tetrapyrrole (Corrin/Porphyrin) Methylases
+:Psat0s471g0440	-0.360008				ATP-dependent protease La (LON) substrate-binding domain
+:Psat0s4722g0080	0.576924				Importin-beta N-terminal domain
+:Psat0s4734g0040	-0.368117				Ribosomal protein L34e
+:Psat0s4784g0040	-1.90471	2.12012	3.72601		Unknown gene
+:Psat0s4805g0040	1.04357		-1.14609		Transferase activity + transferring phosphorus-containing groups
+:Psat0s4922g0080	-0.570749		0.492334		Myb-like DNA-binding domain
+:Psat0s4997g0040	-0.444743		0.43408		MTERF
+:Psat0s5008g0040	0.678562	0.912388			26S proteasome + regulatory subunit Rpn7
+:Psat0s5117g0080	1.18717		-1.31295		Purine ribonucleotide binding
+:Psat0s5174g0040	1.36944	-3.07449	-3.91358		Gamma-thionin family
+:Psat0s545g0040	0.464118				PWWP domain
+:Psat0s546g0120	-0.897381		0.665072		Unknown gene
+:Psat0s581g0040	-0.498931				Myb-like DNA-binding domain
+:Psat0s6170g0080	-0.465363	-0.697848			RNA recognition motif. (a.k.a. RRM + RBD + or RNP domain)
+:Psat0s629g0200	-0.356735				Intracellular membrane-bounded organelle
+:Psat0s62g0080	-0.725702	-0.723815			Ribose/Galactose Isomerase
+:Psat0s654g0120	-0.706564				Ring finger domain
+:Psat0s6670g0080	-0.700051		0.719998		Amidohydrolase family
+:Psat0s6878g0040	-0.578445	-0.736123			RNA recognition motif. (a.k.a. RRM + RBD + or RNP domain)
+:Psat0s699g0040	0.388113				SH2 domain
+:Psat0s7003g0080	-0.997879	1.44437	2.60196		HCO3- transporter family
+:Psat0s709g0120	-0.582472		0.764898		ChaC-like protein
+:Psat0s730g0160	-0.672218	2.22171	2.11351		Auxin responsive protein
+:Psat0s73g0120	-0.81256				Unknown gene
+:Psat0s741g0240	0.561677				E3 Ubiquitin ligase
+:Psat0s743g0040	0.743645				Plant organelle RNA recognition domain
+:Psat0s762g0080	-0.622743	0.627831	1.28676		Senescence regulator
+:Psat0s769g0040	-0.402392		0.429639		HD domain
+:Psat0s769g0120	0.603339	0.906595			Putative diphthamide synthesis protein
+:Psat0s797g0120	0.877551		-0.42509		KH domain
+:Psat0s813g0040	-0.349753				Myb-like DNA-binding domain
+:Psat0s82g0040	-0.925318				Unknown gene
+:Psat0s899g0040	-0.708831	-0.664841			Zinc carboxypeptidase
+:Psat0s96g0040	-0.47771				Unknown gene
+:Psat0ss1196g0120	-0.558289				Protein kinase domain
+:Psat0ss1196g0280	0.601889	0.568318			ABC-2 type transporter
+:Psat0ss1279g0400	0.770553				Ceramidase
+:Psat0ss2010g0120	-0.838761		1.18685		Leucine-rich repeat
+:Psat0ss2518g0320	-0.711287	1.47552	2.07536		Histidine phosphatase superfamily + clade-1
+:Psat0ss2585g0200	-0.676143		0.603568		E1-E2 ATPase
+:Psat0ss7919g0160	-0.677197				Unknown gene
+:Psat0ss7919g0200	-0.554616		0.542747		PEP-utilising enzyme + TIM barrel domain
+:Psat0ss8104g0080	-0.646481	-0.619281			Unknown gene
+:Psat0ss9306g0040	0.670863		-0.663592		Zinc-finger double-stranded RNA-binding
+:Psat0ss9363g0320	0.360589	-0.533632	-0.597695		Xylose isomerase signature
+:Psat0ss9363g0360	-0.367494				ADP-ribosylation factor family
+:Psat1g000520	0.474247				Deoxynucleoside kinase
+:Psat1g001040	-1.4754		1.31166		2OG-Fe(II) oxygenase superfamily
+:Psat1g002000	-0.320971				Intracellular membrane-bounded organelle
+:Psat1g002040	-0.343238				CAMP-regulated phosphoprotein/endosulfine conserved region
+:Psat1g002280	-0.380228	0.530973	0.604679		NAD(P)-binding Rossmann-like domain
+:Psat1g002640	0.672113				Unknown gene
+:Psat1g003320	0.793679				Protein of unknown function (DUF 659)
+:Psat1g005280	0.423719	0.656053	0.508435		Thaumatin family
+:Psat1g005400	-0.421423		0.531056		Pentacotripeptide-repeat region of PROPR
+:Psat1g005440	-0.438363	-0.625253	-0.449565		AKAP7 2'5' RNA ligase-like domain
+:Psat1g006320	0.761341				Auxin responsive protein
+:Psat1g006560	0.628286				Peptidase S24-like
+:Psat1g006600	-0.483892	0.372814	0.646958		Polyprenyl synthetase
+:Psat1g007000	-0.626503		0.921734		EF-hand domain pair
+:Psat1g007080	0.321478				Unknown gene
+:Psat1g007680	-0.39352	-0.71811			Unknown gene
+:Psat1g007920	0.508183				O-methyltransferase
+:Psat1g008120	0.664548				DNA mismatch repair protein Mlh1 C-terminus
+:Psat1g008600	-0.570618		0.494406		Cytochrome P450
+:Psat1g008920	0.981996	1.36453	1.15674		Cytochrome P450
+:Psat1g009080	0.53299				C2 domain
+:Psat1g009920	-0.661524				Elongation factor Tu GTP binding domain
+:Psat1g010000	-0.900845	1.87415	2.71207		Protein kinase domain
+:Psat1g010240	1.38087				Glutathione S-transferase + N-terminal domain
+:Psat1g011240	0.282812	0.391348			Initiation factor eIF2 gamma + C terminal
+:Psat1g012120	0.32298				Glycosyl transferases group 1
+:Psat1g012160	-0.70353	-0.855664			Gag-polypeptide of LTR copia-type
+:Psat1g012640	-0.407413	0.632052	0.953273		Galactose oxidase + central domain
+:Psat1g013000	-0.396758				Protein of unknown function (DUF2854)
+:Psat1g013640	0.497353				Nuclear fragile X mental retardation-interacting protein 1 + conservedregion
+:Psat1g014040	-0.67294				Phosphoglycerate kinase
+:Psat1g017360	-0.707597		0.83114		Eukaryotic aspartyl protease
+:Psat1g017720	0.462112	0.6763	0.604145		Proteasome assembly chaperone 4
+:Psat1g018280	-0.527103	-0.455977			Zinc-binding dehydrogenase
+:Psat1g018480	0.892955				Cell part
+:Psat1g019120	-0.537831				Leucine Rich repeats (2 copies)
+:Psat1g019840	0.324061				Endoplasmic Reticulum Oxidoreductin 1 (ERO1)
+:Psat1g020560	-0.38606				RNA recognition motif. (a.k.a. RRM + RBD + or RNP domain)
+:Psat1g021080	0.473121		-0.38768		Glycosyl hydrolase family 79 + N-terminal domain
+:Psat1g021880	-0.711489				Purine nucleobase transmembrane transport
+:Psat1g022040	1.12169	0.983301			PPR repeat family
+:Psat1g022400	-0.68955				Unknown gene
+:Psat1g022680	0.742064	1.69505	1.30313		Sugar (and other) transporter
+:Psat1g022840	-0.572243				Adenylate kinase
+:Psat1g024680	0.713224				Nuclear pore complex scaffold + nucleoporins 186/192/205
+:Psat1g024760	0.428896				Metalloenzyme superfamily
+:Psat1g026560	-0.522074	-1.00226	-0.40184		Uncharacterized conserved protein (DUF2358)
+:Psat1g027240	0.801934	0.574235			PPR repeat family
+:Psat1g027560	0.826309	0.666111			DEAD/DEAH box helicase
+:Psat1g030240	0.843602	0.463136			SURF1 family
+:Psat1g030720	-0.587808				Methyltransferase domain
+:Psat1g030920	0.624922	0.533076			Putative sugar-binding N-terminal domain
+:Psat1g031160	-1.27958	-1.24325			Auxin responsive protein
+:Psat1g032800	0.954767	0.64149			Clustered mitochondria
+:Psat1g032920	-0.613264	2.618	2.56841		PPR repeat family
+:Psat1g035120	0.699573				Ribosomal protein S24/S35 + mitochondrial
+:Psat1g035520	1.04474	-2.18087	-3.7539		GTP cyclohydrolase II
+:Psat1g036800	-1.13387				Protein of unknown function (DUF1639)
+:Psat1g038960	0.567724	1.09742	0.710285		Xylanase inhibitor N-terminal
+:Psat1g039320	-0.875755		0.927022		ATP-dependent Clp protease adaptor protein ClpS
+:Psat1g039800	-1.49303	-1.95723	-1.17237		Heavy-metal-associated domain
+:Psat1g040280	-0.9828				Aldehyde dehydrogenase family
+:Psat1g041160	-0.663569	-0.765535			Late embryogenesis abundant protein
+:Psat1g042400	0.672957				Fcf2 pre-rRNA processing
+:Psat1g043440	-0.53139	0.845027	1.11077		PP-loop family
+:Psat1g043560	0.771137				Intracellular part
+:Psat1g046480	-0.472599				Plastid and cyanobacterial ribosomal protein (PSRP-3 / Ycf65)
+:Psat1g047000	0.808754	-0.863568	-2.12211		ABC transporter transmembrane region
+:Psat1g047880	-1.37815				Pectinesterase
+:Psat1g048040	0.344602				Protein kinase domain
+:Psat1g048640	-0.575606				HAD superfamily + subfamily IIIB (Acid phosphatase)
+:Psat1g048840	0.760363	0.979142			Carbohydrate-binding protein of the ER
+:Psat1g048960	-0.421152		0.354195		Snf7
+:Psat1g050880	0.69735				Single-strand binding (SSB) domain profile.
+:Psat1g051560	0.678173	0.832976	0.49358		Ankyrin repeats (many copies)
+:Psat1g054960	0.529043				RNA recognition motif. (a.k.a. RRM + RBD + or RNP domain)
+:Psat1g056480	1.04085				Domain of unknown function (DUF3523)
+:Psat1g056960	-0.467825	-0.61346			Tetratricopeptide repeat
+:Psat1g058960	-0.863108				Carbonic anhydrase
+:Psat1g059120	-0.910088	-0.866685			Unknown gene
+:Psat1g060200	0.789177				Reverse transcriptase-like
+:Psat1g060440	0.886861				Pre-mRNA-splicing factor SF3a complex subunit 2 (Prp11)
+:Psat1g060720	-0.387626				2'-5' RNA ligase superfamily
+:Psat1g062200	0.563703	0.404984			Uncharacterised protein family (UPF0121)
+:Psat1g062680	-0.409317				GDSL/SGNH-like Acyl-Esterase family found in Pmr5 and Cas1p
+:Psat1g063440	-0.574041				Protein kinase domain
+:Psat1g066040	0.555131	0.316216			N2 +N2-dimethylguanosine tRNA methyltransferase
+:Psat1g066080	0.623245		-1.24932		Reversibly glycosylated polypeptide
+:Psat1g066240	0.733793	-0.431795	-0.736541		Cytochrome P450
+:Psat1g067920	1.06019				UDP-glucoronosyl and UDP-glucosyl transferase
+:Psat1g068160	-0.957478	1.66058	1.91705		Transferase activity + transferring glycosyl groups
+:Psat1g068200	-0.71495	1.49435	1.75601		UDP-glucoronosyl and UDP-glucosyl transferase
+:Psat1g073200	-1.13907				ZF-HD protein dimerisation region
+:Psat1g073520	-0.382369				Starch synthase catalytic domain
+:Psat1g074560	0.630774				Putative death-receptor fusion protein (DUF2428)
+:Psat1g074680	-0.927407		1.20611		Glutaredoxin
+:Psat1g075640	-0.421187				3-dehydroquinate synthase (EC 4.6.1.3)
+:Psat1g077080	-0.750189		0.759437		ABC transporter transmembrane region
+:Psat1g078440	-0.511052		0.594062		Unknown gene
+:Psat1g078760	0.404062				Glycosyl hydrolases family 38 N-terminal domain
+:Psat1g080240	-0.530494	-1.42274	-0.661889		Rhomboid family
+:Psat1g080640	-0.573784				Serine aminopeptidase + S33
+:Psat1g081320	0.410892	0.409345			Unknown gene
+:Psat1g082040	-0.47084	0.631457	0.945131		Fatty acid hydroxylase superfamily
+:Psat1g085720	0.379458				SWIB/MDM2 domain
+:Psat1g086600	1.76104	3.38575	2.90828		Enoyl-(Acyl carrier protein) reductase
+:Psat1g087280	-0.890007	1.70284	2.19587		PQ loop repeat
+:Psat1g087640	0.392233	0.30032			Proteasome subunit
+:Psat1g087680	0.57693		-0.3918		Plant specific mitochondrial import receptor subunit TOM20
+:Psat1g088560	-0.450969				Putative GTPase activating protein for Arf
+:Psat1g089880	-0.439736	-0.572888			Amino acid permease
+:Psat1g092360	0.495345				Transition metal ion binding
+:Psat1g094960	-0.886907		0.83768		Plant phosphoribosyltransferase C-terminal
+:Psat1g095320	-0.590537	-0.617099			Syntaxin
+:Psat1g095440	-0.558062				Cu-Zn-superoxide dismutase family signature
+:Psat1g095480	0.330785				Eukaryotic initiation factor 4E
+:Psat1g096000	0.354873	0.368738			Galactose-1-phosphate uridyl transferase + N-terminal domain
+:Psat1g096040	0.57547	0.553942			Galactose-1-phosphate uridyl transferase + N-terminal domain
+:Psat1g096440	-0.820912	-0.504169			FAE1/Type III polyketide synthase-like protein
+:Psat1g097840	0.426593	0.351864			DHHC palmitoyltransferase
+:Psat1g098440	0.470692	0.529714			Pyridine nucleotide-disulphide oxidoreductase
+:Psat1g098880	0.522727		-0.484178		MFS/sugar transport protein
+:Psat1g099120	-0.525621				Fructose-1 +6-bisphosphatase signature
+:Psat1g099320	-1.17613				Unknown gene
+:Psat1g099360	-1.01294				Unknown gene
+:Psat1g101240	0.597234	0.432921			Fibrillarin
+:Psat1g101480	0.493912				Unknown gene
+:Psat1g102080	-0.617971	2.0083	2.22109		3-oxo-5-alpha-steroid 4-dehydrogenase
+:Psat1g102960	-0.941985		0.571374		BAG domain
+:Psat1g104240	-0.687275	0.559837	0.964194		ATPase family associated with various cellular activities (AAA)
+:Psat1g105240	-0.682994	-0.320409			Intracellular membrane-bounded organelle
+:Psat1g105960	-0.618769				Unknown gene
+:Psat1g106440	-0.64646	-1.4201			Unknown gene
+:Psat1g106640	1.09437	0.734652			AP2 domain
+:Psat1g107040	0.698899				Helix-loop-helix DNA-binding domain
+:Psat1g107920	0.543005				Prokaryotic membrane lipoprotein lipid attachment site profile.
+:Psat1g108880	-1.00567				UDP-glucoronosyl and UDP-glucosyl transferase
+:Psat1g109120	-0.410426				Oxidoreductase family + NAD-binding Rossmann fold
+:Psat1g109880	-0.667086				Cell cycle regulated microtubule associated protein
+:Psat1g110600	0.699282		-0.567265		Glycolipid transfer protein (GLTP)
+:Psat1g111960	-0.617884				Chlorophyll A-B binding protein
+:Psat1g114800	0.606455				EIF-6 family
+:Psat1g114840	0.403746				TCP-1/cpn60 chaperonin family
+:Psat1g117520	-0.628707	1.28872	1.5481		Alpha/beta hydrolase fold
+:Psat1g120440	0.687056		-0.846205		ABC transporter
+:Psat1g121400	0.346152	0.442211			Translation initiation factor eIF3 subunit
+:Psat1g121800	-0.336961				Cell wall macromolecule catabolic process
+:Psat1g122720	-1.40814	1.47688	2.40885		OPT oligopeptide transporter protein
+:Psat1g124800	0.654882	-0.643558	-1.0991		Dak1 domain
+:Psat1g125120	-0.919463	-0.714278			Myb-like DNA-binding domain
+:Psat1g127120	0.282137	0.403092			Citrate synthase + C-terminal domain
+:Psat1g127240	0.506901	-0.857155	-1.23055		Unknown gene
+:Psat1g129120	-0.636711				Zinc-ribbon
+:Psat1g129560	-0.498597				Plant protein of unknown function (DUF946)
+:Psat1g129880	-0.570302	-0.595319	-0.391485		Myosin head (motor domain)
+:Psat1g130560	0.326165				CTP synthase N-terminus
+:Psat1g131720	1.52162	-1.31337	-2.01847		Protein kinase domain
+:Psat1g132280	0.362626				DEAD/DEAH box helicase
+:Psat1g132920	0.891686				Zinc finger + C3HC4 RING-type
+:Psat1g136080	0.48443				Tify domain
+:Psat1g137920	0.31778				ARID/BRIGHT DNA binding domain
+:Psat1g139560	-0.590526				Chlorophyll A-B binding protein
+:Psat1g140640	1.59555		-1.43606		FAD binding domain
+:Psat1g142320	-0.694103				Triose-phosphate Transporter family
+:Psat1g146160	-0.332193				Aldose 1-epimerase
+:Psat1g146880	-0.388156				Pentatricopeptide repeat domain
+:Psat1g148320	-0.6257				D-Tyr-tRNA(Tyr) deacylase
+:Psat1g149800	0.506769		-0.625977		E1-E2 ATPase
+:Psat1g150600	-0.702682	-0.61526			Plant protein of unknown function
+:Psat1g151680	-0.495196	0.649104	0.973687		Glycosyltransferase family 92
+:Psat1g151920	0.561032	0.560178			PPR repeat family
+:Psat1g152560	0.521012				CW-type Zinc Finger
+:Psat1g153360	-0.745581	-1.11044			Unknown gene
+:Psat1g154920	0.525444	2.28912	1.64713		Non-SMC mitotic condensation complex subunit 1
+:Psat1g155000	-0.379784	-0.522138			WD domain + G-beta repeat
+:Psat1g155880	-0.806596		1.53146		Ring finger domain
+:Psat1g157000	1.27282	2.14094	1.54593		Major pollen allergen Bet V1 signature
+:Psat1g157560	-0.709493	-0.815229			AP2 domain
+:Psat1g159000	-0.677659	-3.58131	-2.47094		Unknown gene
+:Psat1g161680	-0.83065	0.366092	1.03009		Iron-Sulfur binding protein C terminal
+:Psat1g161960	0.353339				WD domain + G-beta repeat
+:Psat1g162280	0.618747	3.73034	3.16016		Unknown gene
+:Psat1g164680	-1.04063		1.0017		Transmembrane amino acid transporter protein
+:Psat1g165160	0.587136	0.893001			Putative S-adenosyl-L-methionine-dependent methyltransferase
+:Psat1g165240	1.26177	1.42685			Wall-associated receptor kinase galacturonan-binding
+:Psat1g165880	0.762635				Cytoplasmic repetitive antigen (CRA) like repeat
+:Psat1g166040	0.464861	0.7828	0.566274		FAD binding domain
+:Psat1g166920	-0.539968				NAD binding domain of 6-phosphogluconate dehydrogenase
+:Psat1g167320	0.575913				Carbohydrate-binding protein of the ER
+:Psat1g167520	-1.52631				Unknown gene
+:Psat1g168120	0.920943	0.72838			G protein beta WD-40 repeat signature
+:Psat1g168400	-0.897503				Peroxidase
+:Psat1g168520	0.401969				YT521-B-like domain
+:Psat1g169240	-0.696856	-0.636623			Unknown gene
+:Psat1g169960	0.383707				IBR domain + a half RING-finger domain
+:Psat1g171800	0.390594				Glycosyl hydrolases family 17
+:Psat1g172160	-0.488145				Polyprenyl synthetase
+:Psat1g172280	0.344045	0.558298			CRAL/TRIO domain
+:Psat1g172760	-0.551671				NUDIX domain
+:Psat1g172920	-0.479548	-1.24133	-0.676677		Heavy-metal-associated domain
+:Psat1g173120	-0.540071	-0.396762			Haloacid dehalogenase-like hydrolase
+:Psat1g173160	0.71092		-0.402908		Protein kinase domain
+:Psat1g175120	0.414056	0.785929	0.43763		Protein of unknown function (DUF568)
+:Psat1g176480	-0.687248				BAG domain
+:Psat1g176520	0.519714	0.687285			Fumarylacetoacetate (FAA) hydrolase family
+:Psat1g177040	-0.482672				Uncharacterised protein family (UPF0041)
+:Psat1g177200	-0.424861				Unknown gene
+:Psat1g177520	1.2362	0.951504			2OG-Fe(II) oxygenase superfamily
+:Psat1g178560	0.444962	0.526062			ATPase family associated with various cellular activities (AAA)
+:Psat1g180640	-0.805571	-0.791444			Starch synthase catalytic domain
+:Psat1g181440	-0.793306	-1.48491			Adenosine/AMP deaminase
+:Psat1g181680	0.33991				RNA recognition motif. (a.k.a. RRM + RBD + or RNP domain)
+:Psat1g181720	-0.453962				MYND finger
+:Psat1g181840	0.288347	0.362374			Der1-like family
+:Psat1g181920	0.415028	0.4713			PPR repeat family
+:Psat1g181960	0.660375		-0.601468		CDP-alcohol phosphatidyltransferase
+:Psat1g182000	-1.48882	-1.30998			Protein kinase domain
+:Psat1g182240	0.982089		-1.30786		Xylanase inhibitor C-terminal
+:Psat1g182280	0.521797	0.591552			Dehydratase family
+:Psat1g182600	-0.839459				Unknown gene
+:Psat1g183400	-0.442863				Heavy-metal-associated domain
+:Psat1g183640	0.879155				IPP transferase
+:Psat1g184280	1.05921				PPR repeat family
+:Psat1g184960	-0.92789				Unknown gene
+:Psat1g185400	-0.850957				Protein phosphatase 2C
+:Psat1g185480	-1.09817		1.18214		SelR domain
+:Psat1g185960	-0.697557				Glutamine synthetase + catalytic domain
+:Psat1g187120	-1.1031		1.10591		Glycosyl hydrolase family 14
+:Psat1g187240	-0.504513				Intracellular membrane-bounded organelle
+:Psat1g188480	0.84458				Unknown gene
+:Psat1g190600	1.05132				Reverse transcriptase (RNA-dependent DNA polymerase)
+:Psat1g190960	0.900986				3' exoribonuclease family + domain 1
+:Psat1g191320	-1.83207	2.93593	4.67914		Unknown gene
+:Psat1g191920	0.519728				DOMON domain
+:Psat1g191960	0.732857				Skp1 family + dimerisation domain
+:Psat1g192400	0.450354	0.492532			Serine hydroxymethyltransferase
+:Psat1g197440	-0.786886				Protein tyrosine kinase
+:Psat1g197920	-0.721316	-0.625282			Domain of unknown function (DUF4228)
+:Psat1g198040	0.600148	0.584942			Protein of unknown function (DUF640)
+:Psat1g199040	-0.624864				Uncharacterised protein family UPF0052
+:Psat1g200560	-0.523528				Unknown gene
+:Psat1g201720	0.389926	0.91002	0.467139		Transcription elongation factor Elf1 like
+:Psat1g202960	-0.573725	-0.415376			Homeobox domain
+:Psat1g203000	-0.416598				DDT domain
+:Psat1g204160	-0.494507				VQ motif
+:Psat1g205000	0.375555				Protein of unknown function (DUF2921)
+:Psat1g207080	-0.48563	-0.784379	-0.707791		Unknown gene
+:Psat1g207280	-0.430807		0.548025		Con80 domain of Katanin
+:Psat1g207760	-0.843365		0.418979		Transmembrane amino acid transporter protein
+:Psat1g207840	0.389582		-0.790391		Ribosomal proteins L26 eukaryotic + L24P archaeal
+:Psat1g209240	-0.428588				WRC
+:Psat1g209400	1.27848		-0.742327		Nucleoside transporter
+:Psat1g210600	-0.759325		1.08605		Myc-type + basic helix-loop-helix (bHLH) domain profile.
+:Psat1g210720	-1.03843				Protein of unknown function + DUF538
+:Psat1g210960	-0.997465				Protein of unknown function (DUF1218)
+:Psat1g212280	-0.632712	-0.445785			Unknown gene
+:Psat1g212920	0.33792		-0.352286		CorA-like Mg2+ transporter protein
+:Psat1g214520	1.56006	1.37993			WD domain + G-beta repeat
+:Psat1g216640	-0.396593				K+ potassium transporter
+:Psat1g218160	0.366711				Protein kinase domain
+:Psat1g218440	0.580719	0.691705			Phosphatidylserine decarboxylase
+:Psat1g219240	0.279065				Tub family
+:Psat1g220000	0.56794	0.560573			Mago binding
+:Psat1g220200	0.474257				PPR repeat family
+:Psat1g220400	0.59117	-0.529415	-0.679367		Unknown gene
+:Psat1g221240	0.472419		-0.495345		Importin-beta N-terminal domain
+:Psat1g221960	-0.58865	-1.15173	-0.765147		Ion transport protein
+:Psat1g222960	0.353279				Homodimerisation region of STAR domain protein
+:Psat1g223120	0.525702		-0.579412		Protein kinase domain
+:Psat1g223800	0.738147		-0.710519		Uncharacterised conserved protein UCP031277
+:Psat1g223960	0.397758				RNA recognition motif. (a.k.a. RRM + RBD + or RNP domain)
+:Psat2g000120	-0.566906				Cellulose synthase
+:Psat2g000280	0.826016	0.525579			Queuine tRNA-ribosyltransferase
+:Psat2g000600	0.482333	0.400285			Protein kinase domain
+:Psat2g000640	-0.418322	0.497489	0.639732		Mitochondrial carrier protein
+:Psat2g001840	-0.462343				Acetyltransferase (GNAT) family
+:Psat2g003280	-0.354199				Emp24/gp25L/p24 family/GOLD
+:Psat2g003840	-0.615434	1.71356	2.37972		Unknown gene
+:Psat2g004040	0.346671				G protein beta WD-40 repeat signature
+:Psat2g004160	0.609897				Protein kinase domain
+:Psat2g004520	-1.05977				Unknown gene
+:Psat2g006600	0.385704	0.507618			Protein of unknown function (DUF1296)
+:Psat2g006920	0.376401				Ribosome biogenesis regulatory protein (RRS1)
+:Psat2g007800	-0.48893				Ion channel
+:Psat2g007880	-0.446462				Cell part
+:Psat2g008800	0.399988	0.767561			MTERF
+:Psat2g009040	-1.47694	2.05892	2.45344		Cytochrome P450
+:Psat2g009280	-3.05735	-1.79817			Transition metal ion binding
+:Psat2g010480	0.470906				Cytosine specific DNA methyltransferase replication foci domain
+:Psat2g010800	-0.398865	0.669773	0.676821		Tubulin binding cofactor A
+:Psat2g010960	-0.350369	-0.489539			Peptide methionine sulfoxide reductase
+:Psat2g011680	0.850604	0.972585			Mitochondrial glycoprotein
+:Psat2g012280	-0.755822		0.480251		Unknown gene
+:Psat2g012440	0.622593				Ribonuclease III domain
+:Psat2g012760	0.313358				G protein beta WD-40 repeat signature
+:Psat2g012920	0.620784				DEAD/DEAH box helicase
+:Psat2g013120	-0.512574				Domain of Kin17 curved DNA-binding protein
+:Psat2g013480	-0.557124	0.464134	0.901518		TIR domain
+:Psat2g015320	0.674233	1.25831	0.697758		Ras family
+:Psat2g015400	0.352696				LSM domain
+:Psat2g017000	-0.548071		0.982409		Xylanase inhibitor N-terminal
+:Psat2g017280	0.452234				PH domain
+:Psat2g018160	-0.56391	-0.712493			Snare region anchored in the vesicle membrane C-terminus
+:Psat2g018280	-1.042	-1.00448			PsbP
+:Psat2g018680	-0.881595	-1.25374	-0.922219		UDP-glucoronosyl and UDP-glucosyl transferase
+:Psat2g018720	0.889567		-0.633963		UDP-glucoronosyl and UDP-glucosyl transferase
+:Psat2g018960	0.794781	4.55606	4.80283		UDP-glucoronosyl and UDP-glucosyl transferase
+:Psat2g020560	1.06641		-1.21107		Unknown gene
+:Psat2g021040	-0.947326				HSF-type DNA-binding
+:Psat2g021520	0.507135				PPR repeat family
+:Psat2g022040	0.675367				SEP domain
+:Psat2g023040	0.570327				Nucleic acid binding
+:Psat2g023920	-0.62943		0.54302		Unknown gene
+:Psat2g024720	-0.653422		0.786812		Unknown gene
+:Psat2g024880	-0.72321	0.981979	1.29537		Protein kinase domain
+:Psat2g025360	-0.820459				Ankyrin repeats (3 copies)
+:Psat2g025760	-1.1378		0.975767		POT family
+:Psat2g026080	-0.866387		0.889586		Domain of unknown function
+:Psat2g028400	1.05564	-2.46004	-3.32871		Unknown gene
+:Psat2g029720	-1.2315	-1.05414			Transmembrane amino acid transporter protein
+:Psat2g029920	-0.827695				Sodium/hydrogen exchanger family
+:Psat2g030640	-0.364927				Helicase conserved C-terminal domain
+:Psat2g030800	-0.597651				Protein tyrosine kinase
+:Psat2g031800	-0.525447				PPR repeat family
+:Psat2g032040	-0.722304		0.686245		GDSL/SGNH-like Acyl-Esterase family found in Pmr5 and Cas1p
+:Psat2g032200	-0.891839				Multicopper oxidase
+:Psat2g033200	0.521578				Phosphatidylinositol-specific phospholipase C + X domain
+:Psat2g033240	0.374767				Structure-specific recognition protein (SSRP1)
+:Psat2g033680	-0.694629				Unknown gene
+:Psat2g034360	0.512057	0.419291			PH domain
+:Psat2g034600	0.392729				JAB1/Mov34/MPN/PAD-1 ubiquitin protease
+:Psat2g035200	-0.434304				Myb-like DNA-binding domain
+:Psat2g035600	-0.52592	-0.468171			Unknown gene
+:Psat2g037680	1.19187	0.889442			RNA recognition motif. (a.k.a. RRM + RBD + or RNP domain)
+:Psat2g038520	-0.632454	-0.440826			RING-variant domain
+:Psat2g040720	0.447551				RNA recognition motif. (a.k.a. RRM + RBD + or RNP domain)
+:Psat2g041480	-0.570689	-0.807193	-0.521523		RNA recognition motif. (a.k.a. RRM + RBD + or RNP domain)
+:Psat2g041560	1.04323	1.68421			C2 domain
+:Psat2g042320	-1.02742	3.80796	4.03906		Unknown gene
+:Psat2g042800	-0.391298				SET domain
+:Psat2g044120	0.595985	0.431111			MAPEG family
+:Psat2g044760	-0.734647		0.713959		Endomembrane protein 70
+:Psat2g045480	-1.28255		0.78953		Zinc finger C2H2 type domain profile.
+:Psat2g046360	-1.0073				Salt stress response/antifungal
+:Psat2g046520	-0.773041				Protein tyrosine kinase
+:Psat2g047760	-1.06891	-0.676988			Myb-like DNA-binding domain
+:Psat2g049720	-0.342228				KIP1-like protein
+:Psat2g050560	1.66318		-1.16985		AP2 domain
+:Psat2g050840	-0.540443				Protein tyrosine kinase
+:Psat2g051160	-0.371866				Expansin signature
+:Psat2g051200	0.364561				Transferase activity + transferring phosphorus-containing groups
+:Psat2g052000	-1.42078	-1.33932			Peroxidase
+:Psat2g052520	-1.60839	-2.69675			Peroxidase
+:Psat2g052960	0.893933				HEAT repeats
+:Psat2g055960	-0.488799				Histidine phosphatase superfamily (branch 1)
+:Psat2g057520	0.712428	1.28569	0.750443		Pyridine nucleotide-disulphide oxidoreductase
+:Psat2g058240	-0.514241				Phosphatidylinositol-specific phospholipase C + X domain
+:Psat2g058280	-1.04283	0.53062	1.61404		Cytochrome P450
+:Psat2g058320	-0.475579		0.478851		Cytochrome P450
+:Psat2g059200	-2.17501				Cytochrome P450
+:Psat2g059480	-0.328695				Myb-like DNA-binding domain
+:Psat2g059600	-1.34717	-1.51826			Multicopper oxidase
+:Psat2g059960	-0.574069	-0.404416			Protein of unknown function DUF125 + transmembrane
+:Psat2g061480	-0.660923		0.423426		Legume lectin domain
+:Psat2g062800	-0.370095	-0.492614			Rhodanese-like domain
+:Psat2g064360	2.5316				Plasma membrane
+:Psat2g064400	-0.703281		0.848001		Rhamnogalacturonate lyase family
+:Psat2g066440	-0.356143				Phosphoglucose isomerase
+:Psat2g070000	0.678796	0.910127			DEAD/DEAH box helicase
+:Psat2g071040	-1.47465	-1.22044			Phosphate-induced protein 1 conserved region
+:Psat2g072880	-0.614057				Unknown gene
+:Psat2g073600	-1.35034				Trehalose-phosphatase
+:Psat2g074160	0.604915	0.849787			Major Facilitator Superfamily
+:Psat2g075040	-0.265055		0.302793		Putative S-adenosyl-L-methionine-dependent methyltransferase
+:Psat2g075640	-0.769936	-0.891025			Unknown gene
+:Psat2g076800	0.711298				Seed dormancy control
+:Psat2g077040	-1.17235				Eukaryotic molybdopterin domain signature
+:Psat2g077720	-0.654864				MORN repeat
+:Psat2g080200	-0.357425				MADS domain signature
+:Psat2g081240	-0.684295				Unknown gene
+:Psat2g082400	0.758992				Unknown gene
+:Psat2g083720	0.83887	0.6508			Elongation factor Tu GTP binding domain
+:Psat2g084080	1.08866				Unknown gene
+:Psat2g084280	-0.666894	-0.375629			NPH3 family
+:Psat2g085880	-0.722855		0.614303		PB1 domain
+:Psat2g085960	-0.324037				Unknown gene
+:Psat2g087760	-0.457499	-0.439953			Unknown gene
+:Psat2g088560	-0.539289				ATP-dependent Clp protease adaptor protein ClpS
+:Psat2g088960	-0.769738				Proline rich extensin signature
+:Psat2g090520	0.570621		-0.710661		ATPase family associated with various cellular activities (AAA)
+:Psat2g090640	0.488818		-0.430188		Hydrolase activity + acting on carbon-nitrogen (but not peptide) bonds + in linear amides
+:Psat2g091520	-0.568743		0.663533		Alcohol dehydrogenase GroES-like domain
+:Psat2g092120	-1.32272				Unknown gene
+:Psat2g093240	0.393034				Phosphoribulokinase / Uridine kinase family
+:Psat2g093600	-1.10388	-0.892747			Universal stress protein family
+:Psat2g098360	-0.717322	-1.02763			Unknown gene
+:Psat2g099680	-0.759978				Unknown gene
+:Psat2g101040	0.343582				Mediator complex subunit 25 von Willebrand factor type A
+:Psat2g101520	-0.912756	-2.8517	-2.03979		Unknown gene
+:Psat2g103000	0.952091				Trp-Asp (WD) repeats circular profile.
+:Psat2g104080	-0.506713		0.354682		Unknown gene
+:Psat2g105120	-0.356566		0.440288		Zinc finger + C3HC4 type (RING finger)
+:Psat2g105720	-0.486831				K+ potassium transporter
+:Psat2g106400	-0.538781				GatB domain
+:Psat2g106920	-0.901191		0.815762		HD domain
+:Psat2g107000	0.41521				Threonyl-tRNA synthetase signature
+:Psat2g109360	-0.504329	0.532158	0.860226		GDSL/SGNH-like Acyl-Esterase family found in Pmr5 and Cas1p
+:Psat2g109920	-0.37383	0.373919	0.560779		Acetyltransferase (GNAT) family
+:Psat2g110480	-0.584884				Fatty acid hydroxylase superfamily
+:Psat2g110840	-0.910683				Purine ribonucleotide binding
+:Psat2g112600	0.841362	2.26038	1.25885		MYND finger
+:Psat2g113760	-1.3403		0.651697		Sulfate permease family
+:Psat2g114480	0.322492				Cyclin + N-terminal domain
+:Psat2g114640	-0.442454				HEAT repeat associated with sister chromatid cohesion
+:Psat2g116320	0.422195				DBC1
+:Psat2g116840	0.80001	1.80567			2OG-Fe(II) oxygenase superfamily
+:Psat2g117800	-0.949306	-1.26439	-0.498652		Expansin signature
+:Psat2g119400	0.661431	0.51358			Galactosyltransferase
+:Psat2g120240	-0.588021	0.895787	1.13667		Protein of unknown function (DUF1666)
+:Psat2g120280	1.03816		-0.903246		Cellular response to red or far red light
+:Psat2g120640	0.53219				Cullin family
+:Psat2g121120	0.817404		-0.729667		APO RNA-binding
+:Psat2g122280	-0.536696	-0.443315			Homeobox domain
+:Psat2g124480	-0.365334				Whirly transcription factor
+:Psat2g125600	-0.997272		0.551764		Thioredoxin
+:Psat2g127040	-1.03555	2.08237	2.2398		Histone H2A signature
+:Psat2g127400	0.984225	1.19938			KH domain
+:Psat2g127560	-0.596719				Eukaryotic elongation factor 5A hypusine + DNA-binding OB fold
+:Psat2g127840	0.666935	0.883058	0.781383		WRKY DNA -binding domain
+:Psat2g128360	-0.287838				Hemimethylated DNA-binding protein YccV like
+:Psat2g128400	1.27489				PPR repeat family
+:Psat2g128760	-0.525231				WRKY DNA -binding domain
+:Psat2g128920	-0.556672		0.602908		A20-like zinc finger
+:Psat2g130280	0.570478	1.05843			Ureide permease
+:Psat2g130440	0.393063				Unknown gene
+:Psat2g130840	-0.73345				Ureide permease
+:Psat2g131480	0.424218	1.69034	1.51084		Domain of unknown function (DUF2828)
+:Psat2g131520	0.858448	4.25099	4.00913		Domain of unknown function (DUF2828)
+:Psat2g131640	-0.642575	1.24922	1.7082		Glucosamine-6-phosphate isomerases/6-phosphogluconolactonase
+:Psat2g131720	0.783615	0.501126			Pterin binding enzyme
+:Psat2g133800	-1.10797		0.814589		Unknown gene
+:Psat2g134200	-0.687397				PPR repeat family
+:Psat2g134320	0.355694				Unknown gene
+:Psat2g134960	1.02345				Unknown gene
+:Psat2g136360	-0.73191	-0.993718			Eggshell protein signature
+:Psat2g137200	1.15713	-1.92138	-2.13064		TPR repeat region circular profile.
+:Psat2g137280	-0.529727				SNARE associated Golgi protein
+:Psat2g139880	0.572174	-0.555179	-0.738691		ESCRT-II complex subunit
+:Psat2g140000	0.331316				PCI domain
+:Psat2g140200	0.584401	0.617048			Response to DNA damage stimulus
+:Psat2g140680	-0.699975				Phosphoribulokinase / Uridine kinase family
+:Psat2g140760	1.1755				Regulation of cellular nucleobase + nucleoside + nucleotide and nucleic acid metabolic process
+:Psat2g141080	-0.623062		0.391083		Domain of unknown function (DUF1995)
+:Psat2g141400	0.607346				Family of unknown function (DUF716)
+:Psat2g142280	-0.621929		0.574014		Tetratricopeptide repeat
+:Psat2g142640	0.637336	1.57901	0.869806		Sodium:solute symporter family
+:Psat2g143320	0.906191	0.796073			Myb/SANT-like DNA-binding domain
+:Psat2g143880	-1.08386		0.837647		Nodulin-like
+:Psat2g144160	-0.752696				Pectinacetylesterase
+:Psat2g145200	1.2138		-0.769864		Cytochrome P450
+:Psat2g146000	0.56875				Ribosomal protein L4/L1 family
+:Psat2g147000	0.683049		-0.757308		Legume lectin domain
+:Psat2g147720	0.526567				Sugar (and other) transporter
+:Psat2g148040	-0.722406	0.772404	1.13849		MutL C terminal dimerisation domain
+:Psat2g148280	0.660659				Hydrolase activity + acting on carbon-nitrogen (but not peptide) bonds + in linear amides
+:Psat2g148560	-0.500903				Receptor family ligand binding region
+:Psat2g150440	-1.05578				Aminotransferase class-V
+:Psat2g151400	-1.02839	-0.649607			Rhodanese-like domain
+:Psat2g151440	0.697516	-0.54032	-1.17302		Protein tyrosine kinase
+:Psat2g152160	0.41869	0.49093			Aconitase family (aconitate hydratase)
+:Psat2g152360	-1.17631	-1.96635	-1.25234		Peroxidase
+:Psat2g152840	0.818337				PPR repeat
+:Psat2g152920	-0.485783				PLAC8 family
+:Psat2g154080	-0.596891				Oxidoreductase NAD-binding domain
+:Psat2g154160	-0.864757				Unknown gene
+:Psat2g154800	0.597942	0.515986			YEATS family
+:Psat2g154920	-0.61981				Intracellular membrane-bounded organelle
+:Psat2g155760	0.332523				Plus-3 domain
+:Psat2g156040	0.708647	0.769956			Pre-rRNA-processing protein TSR2
+:Psat2g156640	-0.798474				Cytochrome P450
+:Psat2g156680	0.938013				Ribosomal RNA adenine dimethylase
+:Psat2g157080	0.468147				Glutaredoxin signature
+:Psat2g158320	-0.513246				Eukaryotic protein of unknown function (DUF829)
+:Psat2g159520	0.827069		-0.633027		Nrap protein
+:Psat2g159600	0.491263	0.806388			Embryonic development ending in seed dormancy
+:Psat2g159680	-0.322859	-0.348346			Vacuolar sorting protein 39 domain 2
+:Psat2g160520	-0.564173				Pterin 4 alpha carbinolamine dehydratase
+:Psat2g160560	-0.612675				Sulfite exporter TauE/SafE
+:Psat2g160920	0.657773				PPR repeat family
+:Psat2g161320	-0.692643				NADPH-dependent FMN reductase
+:Psat2g161480	-1.79823	-2.67609	-1.81637		UDP-glucoronosyl and UDP-glucosyl transferase
+:Psat2g162400	1.49779		-1.38289		Mitochondrial calcium uniporter
+:Psat2g162960	-0.353838	-0.766881			Associated with HOX
+:Psat2g163800	0.314415				Thioredoxin
+:Psat2g164160	0.719402	0.39831			Unknown gene
+:Psat2g164440	1.43967	2.98963	2.73577		Alpha/beta hydrolase fold-1
+:Psat2g165040	0.352358	0.365445			Misato Segment II tubulin-like domain
+:Psat2g165400	-0.998482				Trp-Asp (WD) repeats profile.
+:Psat2g165520	0.38701				Glutathione S-transferase/chloride channel + C-terminal
+:Psat2g167360	-0.973268				Aromatic-ring hydroxylase (flavoprotein monooxygenase) signature
+:Psat2g167480	0.333544				RNA recognition motif. (a.k.a. RRM + RBD + or RNP domain)
+:Psat2g167560	0.875082	-1.04158	-1.95745		Lipase (class 3)
+:Psat2g170320	-0.436732				NPH3 family
+:Psat2g172640	0.689521	0.931053	0.605831		Regulation of cellular nucleobase + nucleoside + nucleotide and nucleic acid metabolic process
+:Psat2g172800	0.557893	0.560877			Aminotransferase class-V
+:Psat2g173640	-0.61963				Glycine cleavage H-protein
+:Psat2g174680	-0.362083				Vacuolar protein sorting 55
+:Psat2g175720	0.581717	0.820842	0.652317		ERCC4 domain
+:Psat2g176400	-0.882425		0.857597		Lipase (class 3)
+:Psat2g176520	0.433139	0.390415			Acyl-coenzyme A oxidase N-terminal
+:Psat2g177080	-0.641025	0.735232	1.16242		Leucine-zipper of ternary complex factor MIP1
+:Psat2g177680	0.587137	0.954501	0.611761		GDP-fucose protein O-fucosyltransferase
+:Psat2g178800	0.305548	0.412907			TPR repeat
+:Psat2g179440	-0.613756		0.557476		Protein tyrosine kinase
+:Psat2g180040	-0.692005		0.83816		MatE
+:Psat2g180240	-0.432212				Kinesin motor domain
+:Psat2g180560	-0.369449				SNARE associated Golgi protein
+:Psat2g180880	-0.528782		0.676373		Photosynthetic electron transport in photosystem I
+:Psat2g181200	-0.601216				KNOX1 domain
+:Psat2g181720	0.733046				Phloem protein 2
+:Psat2g182160	0.513351	0.633126			Domain of unknown function (DUF296)
+:Psat2g182400	0.374086	0.448357			Transcription factor S-II (TFIIS) + central domain
+:Psat2g183000	-1.55134	1.50917	1.8781		Unknown gene
+:Psat2g184640	-1.44696	8.71856	10.1655		Tubby + C-terminal
+:Psat2g186200	0.348621				RNA binding motif protein 8 family signature
+:Psat2g186280	1.14628				PPR repeat family
+:Psat2g186640	0.537178				FKBP-type peptidyl-prolyl cis-trans isomerase
+:Psat2g186800	-0.410563				De-etiolated protein 1 Det1
+:Psat2g186960	0.327458				Hexokinase
+:Psat2g187400	0.631745				PLAC8 family
+:Psat2g187520	0.857702		-0.792703		Unknown gene
+:Psat2g188080	0.673231				Bacterial leader peptidase 1 (S26A) family signature
+:Psat2g188880	0.516031	0.528316			Unknown gene
+:Psat2g189440	-0.819305	-1.64193			PLATZ transcription factor
+:Psat2g189520	1.02935	0.9597			DYW family of nucleic acid deaminases
+:Psat2g189680	-0.356692				Plus-3 domain
+:Psat2g191040	0.664215				KH domain
+:Psat2g191120	0.566488				Unknown gene
+:Psat3g000840	-0.463075				Unknown gene
+:Psat3g002520	1.0898	1.38221			UDP-glucoronosyl and UDP-glucosyl transferase
+:Psat3g002720	0.648789	1.79731	1.29784		Ion transport protein
+:Psat3g002760	1.61866		-1.36028		KH domain
+:Psat3g005320	0.715446				RNA recognition motif. (a.k.a. RRM + RBD + or RNP domain)
+:Psat3g005400	0.437816				MuDR family transposase
+:Psat3g005440	-1.13485				Plasma membrane
+:Psat3g006080	0.566979				C-Myc-binding protein signature
+:Psat3g006600	0.312943				Protein of unknown function (DUF3353)
+:Psat3g008000	-1.81875				Myb/SANT-like DNA-binding domain
+:Psat3g008040	0.582496				TRNA pseudouridine synthase D (TruD)
+:Psat3g010040	0.557184				Ring finger domain
+:Psat3g011120	-0.635026		0.690122		Ferric reductase NAD binding domain
+:Psat3g011880	1.3855	0.851926			Phloem protein 2
+:Psat3g013320	0.566226				Eukaryotic translation initiation factor 3 subunit 7 (eIF-3)
+:Psat3g013600	0.740909	0.724548			Calmodulin binding protein-like
+:Psat3g014320	-0.631773				NAD dependent epimerase/dehydratase family
+:Psat3g015480	0.369294				DEAD/DEAH box helicase
+:Psat3g015840	-0.448483	-0.446424			Cyclophilin type peptidyl-prolyl cis-trans isomerase/CLD
+:Psat3g015880	0.308385				TRNA synthetases class I (R)
+:Psat3g016360	-0.997008		0.895924		Unknown gene
+:Psat3g016400	-0.840941	-0.844342			Chitinase class I
+:Psat3g016720	0.309119				Sec23/Sec24 trunk domain
+:Psat3g016920	-1.1973		0.750131		Transferase family
+:Psat3g018400	0.759408				WD domain + G-beta repeat
+:Psat3g018680	-0.553959	0.478311	0.728134		Nitrogen regulatory protein P-II
+:Psat3g018880	-1.05593				HCO3- transporter family
+:Psat3g019320	1.28108				WRKY DNA -binding domain
+:Psat3g020560	-1.37813				Domain of unknown function (DUF4228)
+:Psat3g020760	0.528426				Transition metal ion binding
+:Psat3g020880	-0.777294				Unknown gene
+:Psat3g021040	-0.875925				Glycosyl hydrolase family 3 C-terminal domain
+:Psat3g021240	0.596791	0.710037			Unknown gene
+:Psat3g021360	0.385402		-0.410844		Histidine kinase- + DNA gyrase B- + and HSP90-like ATPase
+:Psat3g021600	0.895393	2.44425	2.14178		Late embryogenesis abundant protein
+:Psat3g022400	0.364108				Ribosomal protein 60S L18 and 50S L18e
+:Psat3g023280	0.395574				Unknown gene
+:Psat3g023920	-0.415309		0.723979		Protein of unknown function + DUF255
+:Psat3g024640	-0.578049				KIP1-like protein
+:Psat3g024840	-0.746728		0.539135		Unknown gene
+:Psat3g026000	0.461845	0.573829	0.406223		PAP2 superfamily
+:Psat3g026040	-0.407251	-0.492544			Serine/threonine phosphatase family signature
+:Psat3g026240	-1.09728				Xanthine/uracil/vitamin C permease
+:Psat3g028080	0.958714				Protein kinase domain
+:Psat3g029240	0.568421				Protein kinase domain
+:Psat3g030640	0.606354				Programmed cell death protein 2 + C-terminal putative domain
+:Psat3g030680	0.721521				Enoyl-(Acyl carrier protein) reductase
+:Psat3g031360	-0.567415	-0.543658			Serine carboxypeptidase S28
+:Psat3g031520	0.474603				Cyclophilin type peptidyl-prolyl cis-trans isomerase/CLD
+:Psat3g031720	0.598528				Vacuolar protein sorting 55
+:Psat3g032320	-0.524684	1.47029	1.74112		SRP54-type protein + GTPase domain
+:Psat3g034640	-0.379309		0.462731		Carbohydrate-binding module 48 (Isoamylase N-terminal domain)
+:Psat3g034760	-0.559309	-0.717258			Protein kinase domain
+:Psat3g035400	0.606124		-0.534836		Myb/SANT-like DNA-binding domain
+:Psat3g035640	1.01979				Unknown gene
+:Psat3g035800	1.18062	0.941424			D-mannose binding lectin
+:Psat3g036240	0.774561				Unknown gene
+:Psat3g036520	0.40821				Pyruvate kinase + barrel domain
+:Psat3g036600	-0.578049				Unknown gene
+:Psat3g037680	-0.484744				Ribosomal protein S6
+:Psat3g037760	0.507464				Cactus-binding C-terminus of cactin protein
+:Psat3g038680	1.07851	9.07527	7.99676		Transferase activity + transferring glycosyl groups
+:Psat3g039120	1.79646		-1.52613		UDP-glucoronosyl and UDP-glucosyl transferase
+:Psat3g040240	-0.506138				Binding
+:Psat3g040800	-0.406501				Triosephosphate isomerase
+:Psat3g042120	-0.662295				Thioredoxin
+:Psat3g043400	-0.389188		0.345605		Unknown gene
+:Psat3g044000	-0.689184	-0.965923	-0.576387		Fasciclin domain
+:Psat3g044160	-0.737424				Unknown gene
+:Psat3g044360	-0.664007				Glycosyltransferase family 43
+:Psat3g046000	0.560792	0.327019			Adenylate kinase
+:Psat3g047480	-0.562624				Domain of unknown function
+:Psat3g048240	0.403035	0.659921	0.381609		Tetratricopeptide repeat
+:Psat3g048840	0.600595	-1.20505	-1.39142		Unknown gene
+:Psat3g048880	0.835715	0.975091			RNA recognition motif. (a.k.a. RRM + RBD + or RNP domain)
+:Psat3g048960	0.348207				PCI domain
+:Psat3g049560	-0.540677		0.568155		Fusaric acid resistance protein-like
+:Psat3g049960	-1.17257	1.76975	3.85283		Domain of unknown function
+:Psat3g050480	-0.977717	-1.10101	-0.552394		PfkB family carbohydrate kinase
+:Psat3g050640	-0.617677	0.887802	1.50364		Glycerophosphoryl diester phosphodiesterase family
+:Psat3g051320	0.390936				WD domain + G-beta repeat
+:Psat3g051920	-1.09784	0.941101	1.53434		TPR repeat region circular profile.
+:Psat3g052120	-0.35289				Alcohol dehydrogenase GroES-like domain
+:Psat3g053560	-0.287763				ELMO/CED-12 family
+:Psat3g054640	-0.672865				Salt stress response/antifungal
+:Psat3g056720	0.412744				Unknown gene
+:Psat3g056920	0.435892				Cotton fibre expressed protein
+:Psat3g057160	-0.555865				GMC oxidoreductase
+:Psat3g057440	1.17794	3.0417	3.31803		ABC-2 type transporter
+:Psat3g059400	0.332593				BHLH-MYC and R2R3-MYB transcription factors N-terminal
+:Psat3g059920	0.868688	0.865984			PRA1 family protein
+:Psat3g061520	-0.682045	-0.444924			Domain of unknown function (DUF4378)
+:Psat3g061720	-0.528734				AUX/IAA family
+:Psat3g062000	-0.84591	-0.947494			AUX/IAA family
+:Psat3g062640	0.756851				DDE superfamily endonuclease
+:Psat3g062680	-0.658051				Sulfate permease family
+:Psat3g063480	1.01855	0.880553			Enoyl-(Acyl carrier protein) reductase
+:Psat3g063800	0.533414				Plant protein of unknown function (DUF868)
+:Psat3g064000	0.4586				Prp18 domain
+:Psat3g064360	-1.24157				Unknown gene
+:Psat3g065000	0.402406				LSM domain
+:Psat3g065560	0.643966	0.488746			RNA polymerase II-binding domain.
+:Psat3g065800	0.511414	0.510173			Elongation factor Tu GTP binding domain
+:Psat3g066280	-0.650556	-0.818334			BSD domain
+:Psat3g066400	-0.571058		0.419074		Unknown gene
+:Psat3g067000	-0.325213				Activator of Hsp90 ATPase + N-terminal
+:Psat3g067800	-0.555266		0.593139		GDSL/SGNH-like Acyl-Esterase family found in Pmr5 and Cas1p
+:Psat3g068360	0.685764		-0.718265		Cation efflux family
+:Psat3g068720	-1.09932				Protein phosphatase 2C
+:Psat3g069640	-1.02044		0.875186		Protein tyrosine kinase
+:Psat3g070360	-0.496466				Cornichon protein
+:Psat3g070440	-0.368215				Helix-loop-helix DNA-binding domain
+:Psat3g070680	-0.562703				Leucine rich repeat N-terminal domain
+:Psat3g071280	-0.649376	-0.566833			Hsp70 protein
+:Psat3g071800	0.381653				Ankyrin repeats (3 copies)
+:Psat3g072560	0.61228		-0.62509		PCI domain
+:Psat3g074400	-0.628611	-0.587953			Mitochondrial glycoprotein
+:Psat3g076400	-0.43294				Plant calmodulin-binding domain
+:Psat3g077080	-0.530006				EF-hand domain pair
+:Psat3g077760	-0.455395				Glutaredoxin
+:Psat3g077960	1.173				Methyltransferase domain
+:Psat3g078000	0.996535				Pyrroline-5-carboxylate reductase dimerisation
+:Psat3g079200	0.909958	0.689973			Pentatricopeptide repeat domain
+:Psat3g079760	0.504073				UBA/TS-N domain
+:Psat3g080040	-0.483097				Helix-loop-helix DNA-binding domain
+:Psat3g080240	-0.407724		0.487533		HMGL-like
+:Psat3g082400	0.745627	0.445906			Ring finger domain
+:Psat3g083040	1.03154				Unknown gene
+:Psat3g083240	0.294531				RNA recognition motif. (a.k.a. RRM + RBD + or RNP domain)
+:Psat3g083520	-0.529544		0.563792		MYB-CC type transfactor + LHEQLE motif
+:Psat3g085440	-0.737857	2.01361	2.368		Exostosin family
+:Psat3g087120	0.456635				MA3 domain
+:Psat3g087240	0.743912				Ribosomal protein TL5 + C-terminal domain
+:Psat3g087320	0.502396		-0.769893		Uncharacterized conserved protein (DUF2215)
+:Psat3g087480	1.29116				Protein of unknown function (DUF1637)
+:Psat3g087760	-0.307196		0.549218		Chromosome condensation regulator RCC1 signature
+:Psat3g089160	-0.430203				HNH endonuclease
+:Psat3g090080	0.667204				Pre-mRNA 3'-end-processing endonuclease polyadenylation factor C-term
+:Psat3g090880	1.25156				PPR repeat family
+:Psat3g091640	-0.973397		0.640399		PPR repeat family
+:Psat3g091760	0.684926	2.61265	1.89396		DNA repair metallo-beta-lactamase
+:Psat3g092760	-0.987297	-1.17173	-0.638914		C2 domain
+:Psat3g093040	0.328256				Protein of unknown function (DUF3754)
+:Psat3g093400	-0.366264				Glycosyl hydrolases family 38 N-terminal domain
+:Psat3g094000	1.01555	0.985819			DYW family of nucleic acid deaminases
+:Psat3g094560	0.739888				Ribosomal L18 of archaea + bacteria + mitoch. and chloroplast
+:Psat3g095280	-0.317972				DHHC palmitoyltransferase
+:Psat3g095800	0.505977	1.41948	1.17302		Alpha/beta hydrolase fold
+:Psat3g096800	0.577675		-0.468704		Methyltransferase domain
+:Psat3g097120	-0.946331	1.38731	2.39671		Secondary active transmembrane transporter activity
+:Psat3g097680	-0.344564				LIS1 homology (LisH) motif profile.
+:Psat3g097880	-0.967728				GMC oxidoreductase
+:Psat3g099160	0.430523				Hyaluronan / mRNA binding family
+:Psat3g100200	0.37849				Domain of unknown function (DUF1771)
+:Psat3g101080	-0.524727	-0.405761			Unknown gene
+:Psat3g102040	-0.454451	0.599215	0.805522		Calreticulin family
+:Psat3g102640	-0.532834				Thioredoxin
+:Psat3g102720	-0.475167				Uncharacterized conserved protein (DUF2358)
+:Psat3g104080	0.674893				Unknown gene
+:Psat3g104200	-0.360054				Glutaredoxin
+:Psat3g104640	-1.22332				Helix-loop-helix DNA-binding domain
+:Psat3g105040	-0.465297				Cytochrome P450
+:Psat3g105160	0.412804	0.799275			Calcineurin-like phosphoesterase
+:Psat3g105480	-0.466776	-0.321514			Alpha/beta hydrolase fold
+:Psat3g105880	-0.912645	-0.698229			Heavy-metal-associated domain
+:Psat3g106600	-1.62958		1.61322		NB-ARC domain
+:Psat3g106720	0.66979				Protein kinase domain
+:Psat3g106760	-0.352631				Carbohydrate-binding protein of the ER
+:Psat3g106920	-0.461583	-0.712723			Glycosyl hydrolases family 28
+:Psat3g107400	0.602297				Protein of unknown function (DUF3522)
+:Psat3g108120	0.553762		-0.59427		Signal peptide peptidase
+:Psat3g110960	0.535495	0.613969			Tetrahydrofolate dehydrogenase/cyclohydrolase family signature
+:Psat3g111880	-0.344046				Glycosyl transferases group 1
+:Psat3g112840	0.425416				C2 domain
+:Psat3g112880	0.483487				Phospholipase D C terminal
+:Psat3g113280	-0.355037		0.391768		Peroxisomal biogenesis factor 11 (PEX11)
+:Psat3g113840	-0.524463				Unknown gene
+:Psat3g115920	0.494557				WD domain + G-beta repeat
+:Psat3g116680	0.390402				Glycosyl transferase family 8
+:Psat3g117160	-0.395698	-0.332922			Domain of unknown function (DUF3411)
+:Psat3g117360	0.468677				Protein tyrosine kinase
+:Psat3g117440	-0.322973		0.347725		Transferase activity + transferring acyl groups other than amino-acyl groups
+:Psat3g117880	1.02922		-1.17486		DEAD/DEAH box helicase
+:Psat3g118320	0.420567	0.571234	0.512573		Alpha galactosidase A
+:Psat3g118440	-0.873581	-0.539976			Protein kinase domain
+:Psat3g120640	-0.741124	-1.10558	-0.646674		Soluble NSF attachment protein + SNAP
+:Psat3g125600	-0.405064				Ubiquitin family
+:Psat3g125840	0.434339				Proteasome subunit
+:Psat3g126840	0.898946	0.586897			SCO1/SenC
+:Psat3g126880	0.43475		-0.539408		Transferase activity + transferring phosphorus-containing groups
+:Psat3g129040	-0.735064	0.666543	1.25886		Glycosyl hydrolase family 1
+:Psat3g130760	-0.441128	0.834438	0.962756		Glycosyl transferases group 1
+:Psat3g131000	0.369857				Zinc finger C2H2 type domain signature.
+:Psat3g131120	-0.460544	-0.521238			Intracellular membrane-bounded organelle
+:Psat3g134200	1.67556	-1.9369	-4.09571		Glutathione S-transferase + N-terminal domain
+:Psat3g134720	-1.41116	-1.08037			Unknown gene
+:Psat3g135840	0.86139				Mitochondrial glycoprotein
+:Psat3g136120	0.857002				Thaumatin family
+:Psat3g137040	-0.563679				Unknown gene
+:Psat3g137280	-0.897643	-0.967941			Multicopper oxidase
+:Psat3g137880	0.996486		-0.956277		Transmembrane amino acid transporter protein
+:Psat3g138640	-0.626685		0.865705		GRAS domain family
+:Psat3g138840	0.575138	0.934237			Oxysterol-binding protein
+:Psat3g140560	0.450879	0.958561	0.582017		PPR repeat family
+:Psat3g142600	-0.540235	1.99656	2.97102		Unknown gene
+:Psat3g143800	-0.940718	0.54127	1.40265		F-box domain
+:Psat3g145080	-0.445591				PPPDE putative peptidase domain
+:Psat3g145560	0.339325				Serine incorporator (Serinc)
+:Psat3g145720	-0.609503				Protein tyrosine kinase
+:Psat3g147440	0.857151		-0.651988		Purple acid Phosphatase + N-terminal domain
+:Psat3g148160	0.387109				Cleavage site for pathogenic type III effector avirulence factor Avr
+:Psat3g149000	0.635353				Dual-specific/protein-tyrosine phosphatase + conserved region
+:Psat3g149240	-0.523566	0.778564	1.24507		AP2 domain
+:Psat3g150080	-1.27977	-2.10295	-1.17464		Zinc-binding dehydrogenase
+:Psat3g150400	-0.979377		0.650881		Helix-loop-helix DNA-binding domain
+:Psat3g151640	0.727603	1.12498	0.676492		CAF1 family ribonuclease
+:Psat3g152680	0.529661				Hexapeptide repeat of succinyl-transferase
+:Psat3g155560	-0.700919		1.4803		Unknown gene
+:Psat3g156760	0.487558				NB-ARC domain
+:Psat3g157680	-0.954977	-1.81414			SBP domain
+:Psat3g158080	-0.56568	-0.517467			Unknown gene
+:Psat3g158440	-1.19614				Retinal pigment epithelial membrane protein
+:Psat3g162320	-0.703968				Glycogen recognition site of AMP-activated protein kinase
+:Psat3g162880	-0.424718		0.63167		TCP family transcription factor
+:Psat3g163280	-0.519453	-0.500572			Unknown gene
+:Psat3g163880	0.686842				RNA polymerase Rpb4
+:Psat3g163920	-0.594216				Telomere recombination
+:Psat3g164600	0.692811				Gag-polypeptide of LTR copia-type
+:Psat3g167880	0.810428	0.531473			Unknown gene
+:Psat3g169440	-0.640265				PPR repeat family
+:Psat3g169800	1.16571				Kelch motif
+:Psat3g171720	-0.55046				Catalytic activity
+:Psat3g172280	-0.353321	0.627469	0.785541		Development and cell death domain
+:Psat3g174000	-0.878929				Unknown gene
+:Psat3g175880	-0.561952				Major facilitator superfamily + general substrate transporter
+:Psat3g181320	1.08531				Unknown gene
+:Psat3g181400	0.42401	-0.664013	-1.03641		Prenyltransferase and squalene oxidase repeat
+:Psat3g182840	0.753454				Domain of unknown function (DUF4516)
+:Psat3g185360	0.591621				Transferase family
+:Psat3g186320	0.326469	0.348397			ACT domain
+:Psat3g188360	0.431904	-0.640251	-0.86263		JAB1/Mov34/MPN/PAD-1 ubiquitin protease
+:Psat3g188560	-0.393246				Xylanase inhibitor N-terminal
+:Psat3g188920	1.79709	1.93398			Aldo/keto reductase family
+:Psat3g189200	-0.421358				Chitinase class I
+:Psat3g189440	-0.83421				Serine carboxypeptidase
+:Psat3g190320	0.789973	0.958287			RNA polymerase Rpb3/Rpb11 dimerisation domain
+:Psat3g190480	-0.619467	-1.62805	-1.22348		Unknown gene
+:Psat3g191240	-0.60676	0.678232	1.06067		Unknown gene
+:Psat3g191440	-0.574958		0.707384		Nuclear transport factor 2 (NTF2) domain
+:Psat3g191560	0.327299				Unknown gene
+:Psat3g192880	0.625169	0.588333			PPR repeat
+:Psat3g194160	-0.395151				Pentatricopeptide repeat
+:Psat3g195160	-0.331446	-0.312749			Thioredoxin
+:Psat3g195640	-0.773168		0.352259		Amino acid permease
+:Psat3g196040	-0.689983	-0.841554			PQQ-like domain
+:Psat3g196440	-1.21306	-1.15178			Glutaredoxin
+:Psat3g196520	0.898994				KDPG and KHG aldolase
+:Psat3g199480	0.635795				Pectinesterase
+:Psat3g200680	-0.335668				Ubiquitin-2 like Rad60 SUMO-like
+:Psat3g200840	0.497182				Unknown gene
+:Psat3g201280	-0.695707	1.59402	1.7049		UDP-glucoronosyl and UDP-glucosyl transferase
+:Psat3g202040	-0.876152	1.35204	2.13417		Heavy metal transport/detoxification protein
+:Psat3g203920	0.468633				Helix-loop-helix DNA-binding domain
+:Psat3g204320	-0.612452				COBRA-like protein
+:Psat3g204360	-0.502598	-0.429819			COBRA-like protein
+:Psat3g204680	-0.729351	-0.339834			Unknown gene
+:Psat3g205160	-0.746477		0.85924		RuBisCO small subunit signature
+:Psat3g205200	-0.667947				Ribulose bisphosphate carboxylase + small chain
+:Psat3g206440	0.336286				TCP-1/cpn60 chaperonin family
+:Psat3g206480	0.387044	0.814238			Zinc-binding dehydrogenase
+:Psat3g207840	-0.694333				ATP synthase
+:Psat3g208160	0.520721				F-box domain
+:Psat3g208280	-0.715171				Leucine rich repeat N-terminal domain
+:Psat4g000760	-1.6433	1.20631	3.121		Voltage gated chloride channel
+:Psat4g001160	0.506737	0.468685			Origin recognition complex (ORC) subunit 5 C-terminus
+:Psat4g002040	0.515377	-0.615792	-0.808204		Glutathione S-transferase + N-terminal domain
+:Psat4g004600	0.407938				LSM domain
+:Psat4g005680	-0.901662	-0.787623			Wall-associated receptor kinase galacturonan-binding
+:Psat4g006040	-0.466173		0.42528		Unknown gene
+:Psat4g006560	-0.590312		0.880664		Protein of unknown function DUF3424
+:Psat4g006680	0.561341				Methyltransferase TYW3
+:Psat4g008440	-0.308368	-0.31677			ThiF family
+:Psat4g008600	-0.471246				Aldehyde dehydrogenase family
+:Psat4g008680	0.422074				TRNA pseudouridine synthase
+:Psat4g008720	1.06237	-1.21293	-1.90904		Eukaryotic porin
+:Psat4g010160	0.681398				WD40/YVTN repeat-like-containing domain
+:Psat4g010480	-0.580945	0.444584	0.944189		Acetyltransferase (GNAT) family
+:Psat4g012000	0.367683	-0.398084	-0.640419		FGGY family of carbohydrate kinases + N-terminal domain
+:Psat4g012120	-0.404655	-0.310167			Protein tyrosine kinase
+:Psat4g012600	1.20977		-0.628144		Domain associated at C-terminal with AAA
+:Psat4g012880	0.420418	0.331268			Protein of unknown function (DUF1777)
+:Psat4g012960	-0.478998				PHD - plant homeodomain finger protein
+:Psat4g014320	-0.806369	-1.05847			Ring hydroxylating alpha subunit (catalytic domain)
+:Psat4g015160	-0.861097		0.821736		Protein tyrosine kinase
+:Psat4g016280	0.6471	0.723472			LYAR-type C2HC zinc finger
+:Psat4g016880	-0.413466				Myosin head (motor domain)
+:Psat4g017200	-0.759965				Photosystem II reaction centre X protein (PsbX)
+:Psat4g017400	-0.692589				Stress responsive A/B Barrel Domain
+:Psat4g017840	0.447592				GDP-fucose protein O-fucosyltransferase
+:Psat4g019360	0.429233				Las17-binding protein actin regulator
+:Psat4g020200	-0.641605				Divergent CCT motif
+:Psat4g020480	-0.728857				Eukaryotic aspartyl protease
+:Psat4g020600	0.882523				Pectinacetylesterase
+:Psat4g020720	0.475176				SNF5 / SMARCB1 / INI1
+:Psat4g021560	-1.38007	-0.456699	0.620652		Unknown gene
+:Psat4g022000	0.4223	-0.284851	-0.428348		TRNA synthetases class I (M)
+:Psat4g022240	-0.354695	0.75335	0.798561		GTP-binding SAR1 protein signature
+:Psat4g022840	-0.324511	-0.477374			Unknown gene
+:Psat4g023240	0.510157	0.782188	0.390715		KH domain
+:Psat4g024520	-0.565359				Transferase activity + transferring phosphorus-containing groups
+:Psat4g024840	0.662882	0.414608			Protein phosphatase 2C
+:Psat4g025840	-1.42443	-1.09993			Protein phosphatase 2C
+:Psat4g027440	-0.409503				Unknown gene
+:Psat4g027720	0.635216				Elongation factor Tu GTP binding domain
+:Psat4g027800	0.535857				DIRP
+:Psat4g028320	1.26079				PPR repeat family
+:Psat4g030240	-0.344939				2OG-Fe(II) oxygenase superfamily
+:Psat4g032400	-0.507688	2.04187	2.10128		Copper amine oxidase + enzyme domain
+:Psat4g032760	0.726643	0.311577			Elongation factor Tu GTP binding domain
+:Psat4g033160	-0.456621		0.45337		KNOX2 domain
+:Psat4g033920	0.803577	0.624925			Cullin binding
+:Psat4g034120	-0.43153				Protein of unknown function (DUF1336)
+:Psat4g035800	0.480919				Ubiquitin carboxyl-terminal hydrolase
+:Psat4g036080	-1.40318		1.19992		Voltage gated chloride channel
+:Psat4g036960	-1.23137		0.624172		EF-hand domain pair
+:Psat4g037000	-0.432481				Protein tyrosine kinase
+:Psat4g037440	0.698272	0.587939			YABBY protein
+:Psat4g037680	-0.84505				Nucleoside transporter
+:Psat4g037800	-0.6603	-0.60823			Serine carboxypeptidase
+:Psat4g038040	-0.782269	-0.582643			Tetratricopeptide repeat-containing
+:Psat4g038160	0.611595				F-box-like
+:Psat4g038520	-0.546531				POT family
+:Psat4g038640	0.524752	0.455265			Ribosomal protein L7Ae/L30e/S12e/Gadd45 family
+:Psat4g038680	0.359231				Ribosomal protein L36
+:Psat4g038720	-0.669468				Protein of unknown function (DUF4050)
+:Psat4g039480	0.374473				Kelch motif
+:Psat4g039800	-2.21412				Unknown gene
+:Psat4g041280	-0.791285				Unknown gene
+:Psat4g043800	-1.16925		0.61084		Protein of unknown function + DUF617
+:Psat4g044640	-0.781635				Rhodanese-like domain
+:Psat4g045880	-0.511899				Adenosylmethionine decarboxylase
+:Psat4g046200	-1.12823	3.4112	2.76299		Universal stress protein family
+:Psat4g046880	1.29949	2.77442			Ribosomal protein S3 + C-terminal domain
+:Psat4g048120	-0.521585	0.680292	0.853236		Acetyltransferase (GNAT) family
+:Psat4g048840	0.624699	0.572401			HNH endonuclease
+:Psat4g049560	1.61596				PPR repeat family
+:Psat4g049960	-0.687875				Ribulose-phosphate 3 epimerase family
+:Psat4g050200	-0.512752				Aromatic-ring hydroxylase (flavoprotein monooxygenase) signature
+:Psat4g050600	1.13501				No apical meristem (NAM) protein
+:Psat4g051280	0.424547	0.38665			Alpha/beta hydrolase family
+:Psat4g051440	0.872353				PPR repeat family
+:Psat4g051840	1.45169		-1.04049		POT family
+:Psat4g052920	-0.559843	0.582245	0.781642		Homeobox domain
+:Psat4g053560	-0.983102				Eukaryotic porin
+:Psat4g054240	-0.567772				Zinc-ribbon
+:Psat4g055320	-2.1015				G protein beta WD-40 repeat signature
+:Psat4g056120	-0.527859	-0.39614			Calmodulin binding protein-like
+:Psat4g057320	0.612522	0.42565			Trypsin-like peptidase domain
+:Psat4g058680	-0.59073		0.535615		Domain of unknown function (DUF239)
+:Psat4g058880	0.354928				Synaptobrevin
+:Psat4g059760	-0.905067	-1.25037			Unknown gene
+:Psat4g060800	0.689352	0.921534			PPR repeat family
+:Psat4g061360	-0.504322				Transmembrane amino acid transporter protein
+:Psat4g062840	-0.942743	-1.43509	-0.942093		Cathepsin propeptide inhibitor domain (I29)
+:Psat4g063800	-1.2002				Unknown gene
+:Psat4g064920	-0.640962				ABC1 family
+:Psat4g064960	0.510077	0.351059			PCI domain
+:Psat4g070040	0.603545				L-lactate dehydrogenase signature
+:Psat4g071280	-0.772222				YABBY protein
+:Psat4g071760	-0.552295				MSP (Major sperm protein) domain
+:Psat4g072480	0.595205				Unknown gene
+:Psat4g072920	0.567012	0.495239			Unknown gene
+:Psat4g072960	0.748286	1.0204	0.514816		Acyl-coenzyme A oxidase N-terminal
+:Psat4g073000	0.643597				Transferase activity + transferring acyl groups other than amino-acyl groups
+:Psat4g075040	0.909768	0.864392			Major Facilitator Superfamily
+:Psat4g075400	0.935887				Unknown gene
+:Psat4g076000	0.456846				Hydrolase activity + hydrolyzing O-glycosyl compounds
+:Psat4g078880	-0.485176				2Fe-2S iron-sulfur cluster binding domain
+:Psat4g079200	-0.708986	-0.421743			TLD
+:Psat4g080000	-0.739204	-1.50288	-0.82989		Plant invertase/pectin methylesterase inhibitor
+:Psat4g080920	0.889384	0.941588			Unknown gene
+:Psat4g083280	0.488836	0.701262			Peroxidase
+:Psat4g083560	-1.39324	-1.7182	-0.590409		NPH3 family
+:Psat4g084040	1.69576				Cytochrome P450
+:Psat4g085120	-0.641285		0.505128		Polysaccharide biosynthesis
+:Psat4g085400	0.662562				SEC-C motif
+:Psat4g087160	0.525475				Zinc finger SWIM-type profile.
+:Psat4g089400	0.632128	0.774138			Ribosomal protein TL5 + C-terminal domain
+:Psat4g089880	-0.584758				Manganese-stabilising protein / photosystem II polypeptide
+:Psat4g090680	-0.378606				Protein of unknown function (DUF3633)
+:Psat4g091040	-0.89132		0.446485		Mitochondrial calcium uniporter
+:Psat4g091080	-2.06861				GNS1/SUR4 family
+:Psat4g091880	0.643281		-0.605705		Zinc-finger double-stranded RNA-binding
+:Psat4g093520	-1.12131	2.08097	3.16542		Fatty acid desaturase + type 1
+:Psat4g094360	-1.1247	-1.15449			ABC transporter
+:Psat4g094600	-0.35174				Inorganic pyrophosphatase
+:Psat4g095320	-0.640181				Pyridoxal phosphate-dependent transferase + major region + subdomain 1
+:Psat4g095360	-0.687336				Aminotransferase class-V
+:Psat4g095600	0.588978	0.616452			Unknown gene
+:Psat4g096120	0.621254				HECT-like Ubiquitin-conjugating enzyme (E2)-binding
+:Psat4g096280	-1.38207		1.22525		Peroxidase
+:Psat4g097000	-1.35268		1.3564		Cytochrome P450
+:Psat4g097720	0.447448				Vacuolar ATP synthase 16kDa subunit signature
+:Psat4g099000	0.471373		-0.513718		Zn-finger in Ran binding protein and others
+:Psat4g099040	-0.565549				Unknown gene
+:Psat4g100240	-0.62106		0.736977		Armadillo-like helical
+:Psat4g101400	-0.495259	0.513285	0.634551		Histidine kinase- + DNA gyrase B- + and HSP90-like ATPase
+:Psat4g101960	0.543351	0.409537			Rad17 cell cycle checkpoint protein
+:Psat4g102320	-1.17009	-1.24732			Peroxidase
+:Psat4g102360	-0.394562				Xylanase inhibitor N-terminal
+:Psat4g102480	0.433611				Late exocytosis + associated with Golgi transport
+:Psat4g102560	-0.974179	-0.862318			Unknown gene
+:Psat4g104080	0.319453				Ubiquitin family
+:Psat4g105800	0.359476				Alpha and gamma adaptin binding protein p34
+:Psat4g106800	0.47763				Kinesin motor domain
+:Psat4g107440	-0.729457				Diacylglycerol acyltransferase
+:Psat4g110520	0.51702				Prokaryotic membrane lipoprotein lipid attachment site profile.
+:Psat4g111600	-0.709801		0.735843		Protein kinase domain
+:Psat4g111760	-0.878537				LrgB-like family
+:Psat4g112000	0.459359		-0.585612		Gamma-thionin family
+:Psat4g113680	0.733009				Sodium/calcium exchanger protein
+:Psat4g114440	0.712805				Protein of unknown function DUF861 + cupin-3
+:Psat4g114560	1.11905	2.24255	1.3887		Probable lipid transfer
+:Psat4g115680	-0.546636				NPH3 family
+:Psat4g115800	1.06016				Unknown gene
+:Psat4g116440	0.779013				Transferase activity + transferring phosphorus-containing groups
+:Psat4g116680	-0.52814				Intracellular membrane-bounded organelle
+:Psat4g117240	-0.640611		0.595099		Kinesin motor domain
+:Psat4g117280	0.364383				UbiA prenyltransferase family
+:Psat4g117640	-0.696438				Dof domain + zinc finger
+:Psat4g117960	1.00046				BHLH-MYC and R2R3-MYB transcription factors N-terminal
+:Psat4g118080	0.745327	3.16304	2.1858		Intracellular membrane-bounded organelle
+:Psat4g119040	-1.34361		1.31548		SOUL heme-binding protein
+:Psat4g119200	0.453616		-0.613679		Uncharacterized protein family UPF0029
+:Psat4g119320	-0.664642		0.560287		Hydrolase activity + acting on acid anhydrides + in phosphorus-containing anhydrides
+:Psat4g119360	-0.811308		0.616194		Kinesin motor domain profile.
+:Psat4g119840	-0.905708				Permease family
+:Psat4g120560	0.548025	0.514371			AUX/IAA family
+:Psat4g120840	-0.543442				Mitochondrial carrier protein
+:Psat4g120880	-0.728956	-1.405			Eggshell protein signature
+:Psat4g122680	0.482273				PIG-X / PBN1
+:Psat4g123440	1.42231				DYW family of nucleic acid deaminases
+:Psat4g123800	-0.800466		0.463893		Zinc-binding dehydrogenase
+:Psat4g124480	-0.928492	0.501208	1.02416		Glycosyl hydrolases family 28
+:Psat4g124800	-0.522076				K+ potassium transporter
+:Psat4g125800	-1.43413		2.41945		Protein kinase domain
+:Psat4g126120	-0.486937				Unknown gene
+:Psat4g127640	0.757889	0.990795	0.663996		Six-bladed beta-propeller + TolB-like
+:Psat4g128640	0.66903		-0.44871		F-box domain
+:Psat4g129640	-1.23455		0.984972		Purine ribonucleotide binding
+:Psat4g130840	-0.851706				NAD dependent epimerase/dehydratase family
+:Psat4g133720	-0.842389	8.6661	9.50849		Prokaryotic membrane lipoprotein lipid attachment site profile.
+:Psat4g134120	0.435795				Domain of unknown function (DUF383)
+:Psat4g135160	-0.321464		0.49275		SelR domain
+:Psat4g136760	-0.416629	1.06991	1.3197		SOUL heme-binding protein
+:Psat4g137160	1.1382	-1.28719	-2.03565		Unknown gene
+:Psat4g139160	0.472004				Src homology 2 (SH2) domain profile.
+:Psat4g140880	-0.646593				Protein of unknown function (DUF1223)
+:Psat4g141000	0.453962		-0.432567		Unknown gene
+:Psat4g142240	0.38533				Copine
+:Psat4g142960	0.764402	2.1259	1.73653		Ion transport protein
+:Psat4g144600	-0.660203	0.588938	0.889805		Unknown gene
+:Psat4g145840	1.45124		-0.95476		PPR repeat family
+:Psat4g150760	-0.543799	2.16678	3.00131		D-isomer specific 2-hydroxyacid dehydrogenase + NAD binding domain
[truncated: 1,213 more rows]

[truncated: 8 more sheets: Table S10, Table S11, Table S12, Table S13, Table S14, Table S15, Table S16, Table S17]
